# Supplementary material
Source: PubMed Central journal article supplement (PMC4216227)
Supplement: jo501121g_si_001.pdf [file jo501121g_si_001.pdf]

Reactivities of Substituted  $\alpha$ -Phenyl-*N-tert*-butyl Nitrones

Marie Rosselin,<sup>†,§</sup> Fanny Choteau,<sup>†,§</sup> Kamal Zéamari,<sup>‡</sup> Kevin Nash,<sup>||,#</sup> Amlan Das,<sup>||,#</sup> Robert Lauricella,<sup>‡</sup> Elisabeth Lojou,<sup>||</sup> Béatrice Tuccio,<sup>‡</sup> Frederick A. Villamena,<sup>||,#\*</sup> Grégory Durand,<sup>†,§\*</sup>

<sup>†</sup>Avignon Université, Equipe Chimie Bioorganique et Systèmes Amphiphiles, 33 rue Louis Pasteur, F-84000 Avignon, France ;

<sup>§</sup>Institut des Biomolécules Max Mousseron (UMR 5247), 15 avenue Charles Flahault, F-34093 Montpellier Cedex 05, France ;

<sup>‡</sup>Aix-Marseille Université-CNRS, Institut de Chimie Radicalaire (UMR 7273), Equipe Spectrométries Appliquées à la Caractérisation Structurale, avenue Escadrille Normandie-Niemen, F-13397 Marseille Cedex 20, France ;

<sup>||</sup>Department of Pharmacology and <sup>#</sup>The Davis Heart and Lung Research Institute, College of Medicine, The Ohio State University, Columbus, OH 43210 ;

<sup>¶</sup>CNRS-Aix-Marseille Université, Bioénergétique et Ingénierie des Protéines (UMR 7281), 31 chemin Joseph Aiguier, F-13402 Marseille Cedex 20, France.

| <b>Table of contents</b>                                                                                                                                                                                                                | <b>Pages</b> |
|-----------------------------------------------------------------------------------------------------------------------------------------------------------------------------------------------------------------------------------------|--------------|
| <b>Figure S1</b> Correlation between log $k^{\text{w}}$ and Clog $P$                                                                                                                                                                    | <b>S3</b>    |
| <b>Figure S2</b> Cyclic voltammograms of PBN and compounds <b>2</b> , <b>6</b> and <b>7</b> in water containing 50 mM of NaCl with a sweep rate of 0.1 V.s <sup>-1</sup>                                                                | <b>S3</b>    |
| <b>Figure S3</b> Cyclic voltammograms of PBN and compounds <b>2</b> , <b>10</b> and <b>11</b> in water containing 50 mM of NaCl with a sweep rate of 0.1 V.s <sup>-1</sup>                                                              | <b>S3</b>    |
| <b>Figure S4</b> Cyclic voltammograms of PBN and compounds <b>1</b> , <b>8</b> and <b>9</b> in water containing 50 mM of NaCl with a sweep rate of 0.1 mV.s <sup>-1</sup>                                                               | <b>S4</b>    |
| <b>Figure S5</b> Cyclic voltammograms of PBN and compounds <b>2</b> , <b>10</b> and <b>11</b> in acetonitrile containing 50 mM of TBAP with a sweep rate of 0.1 mV.s <sup>-1</sup>                                                      | <b>S4</b>    |
| <b>Figure S6</b> Cyclic voltammograms of PBN and compounds <b>1</b> , <b>8</b> and <b>9</b> in acetonitrile containing 50 mM of TBAP with a sweep rate of 0.1 mV.s <sup>-1</sup>                                                        | <b>S4</b>    |
| <b>Figure S7</b> Cyclic voltammograms of PBN and compounds <b>2</b> , <b>10</b> and <b>11</b> in acetonitrile containing 50 mM of TBAP with a sweep rate of 0.1 V.s <sup>-1</sup>                                                       | <b>S5</b>    |
| <b>Figure S8</b> Cyclic voltammograms of PBN and compounds <b>1</b> , <b>8</b> and <b>9</b> in acetonitrile containing 50 mM of TBAP with a sweep rate of 0.1 V.s <sup>-1</sup>                                                         | <b>S5</b>    |
| <b>Figure S9</b> Sweep rate variations for PBN oxidation in acetonitrile containing 50 mM of TBAP at sweep rate ranging from 0.1 V.s <sup>-1</sup> to 1 V.s <sup>-1</sup>                                                               | <b>S5</b>    |
| <b>Figure S10</b> Sweep rate variations for PBN reduction in acetonitrile containing 50 mM of TBAP at sweep rate ranging from 0.1 V.s <sup>-1</sup> to 1 V.s <sup>-1</sup>                                                              | <b>S6</b>    |
| <b>Figure S11</b> Sweep rate variations on PBN, $\beta$ -OAc-PBN and $\beta$ -NHAc-PBN oxidation (a) and reduction (b) in acetonitrile containing 50 mM of TBAP at sweep rate ranging from 0.1 V.s <sup>-1</sup> to 1 V.s <sup>-1</sup> | <b>S6</b>    |
| <b>Figure S12</b> Correlation between nitronyl-carbon charge densities and <sup>1</sup> H NMR chemical shifts                                                                                                                           | <b>S7</b>    |
| <b>Figure S13</b> Charge densities of nitronyl carbons versus free energies of O <sub>2</sub> <sup>-</sup> addition reactions                                                                                                           | <b>S7</b>    |

|                                |                                                                                                                                                      |                 |
|--------------------------------|------------------------------------------------------------------------------------------------------------------------------------------------------|-----------------|
| <b>Table S1</b>                | Natural population analysis (NPA) charge densities of the nitronyl-atoms of PBN derivatives at the PCM/B3LYP/6-31+G**//B3LYP/6-31G* level of theory. | <b>S8</b>       |
| <b>Table S2</b>                | Natural bond orbital (NBO) analysis of the nitronyl-atoms of PBN derivatives at the PCM/B3LYP/6-31+G**//B3LYP/6-31G* level of theory.                | <b>S9</b>       |
| <b>Complete reference (50)</b> |                                                                                                                                                      | <b>S10</b>      |
| <b>Figure S14</b>              | <sup>1</sup> H NMR spectrum of compound <b>1</b> in CDCl <sub>3</sub>                                                                                | <b>S11</b>      |
| <b>Figure S15</b>              | <sup>13</sup> C NMR spectrum of compound <b>1</b> in CDCl <sub>3</sub>                                                                               | <b>S11</b>      |
| <b>Figure S16</b>              | <sup>1</sup> H NMR spectrum of compound <b>2</b> in CDCl <sub>3</sub>                                                                                | <b>S12</b>      |
| <b>Figure S17</b>              | <sup>13</sup> C NMR spectrum of compound <b>2</b> in CDCl <sub>3</sub>                                                                               | <b>S12</b>      |
| <b>Figure S18</b>              | <sup>1</sup> H NMR spectrum of compound <b>3</b> in CDCl <sub>3</sub>                                                                                | <b>S13</b>      |
| <b>Figure S19</b>              | <sup>13</sup> C NMR spectrum of compound <b>3</b> in CDCl <sub>3</sub>                                                                               | <b>S13</b>      |
| <b>Figure S20</b>              | <sup>1</sup> H NMR spectrum of compound <b>5</b> in CDCl <sub>3</sub>                                                                                | <b>S14</b>      |
| <b>Figure S21</b>              | <sup>13</sup> C NMR spectrum of compound <b>5</b> in CDCl <sub>3</sub>                                                                               | <b>S14</b>      |
| <b>Figure S22</b>              | <sup>1</sup> H NMR spectrum of compound <b>6</b> in CDCl <sub>3</sub>                                                                                | <b>S15</b>      |
| <b>Figure S23</b>              | <sup>13</sup> C NMR spectrum of compound <b>6</b> in CDCl <sub>3</sub>                                                                               | <b>S15</b>      |
| <b>Figure S24</b>              | <sup>1</sup> H NMR spectrum of compound <b>7</b> in CDCl <sub>3</sub>                                                                                | <b>S16</b>      |
| <b>Figure S25</b>              | <sup>13</sup> C NMR spectrum of compound <b>7</b> in CDCl <sub>3</sub>                                                                               | <b>S16</b>      |
| <b>Figure S26</b>              | <sup>1</sup> H NMR spectrum of compound <b>8</b> in CDCl <sub>3</sub>                                                                                | <b>S17</b>      |
| <b>Figure S27</b>              | <sup>13</sup> C NMR spectrum of compound <b>8</b> in CDCl <sub>3</sub>                                                                               | <b>S17</b>      |
| <b>Figure S28</b>              | <sup>1</sup> H NMR spectrum of compound <b>10</b> in CDCl <sub>3</sub>                                                                               | <b>S18</b>      |
| <b>Figure S29</b>              | <sup>13</sup> C NMR spectrum of compound <b>10</b> in CDCl <sub>3</sub>                                                                              | <b>S18</b>      |
| <b>Figure S30</b>              | <sup>1</sup> H NMR spectrum of compound <b>11</b> in CDCl <sub>3</sub>                                                                               | <b>S19</b>      |
| <b>Figure S31</b>              | <sup>13</sup> C NMR spectrum of compound <b>11</b> in CDCl <sub>3</sub>                                                                              | <b>S19</b>      |
| <b>Figure S32</b>              | High resolution mass spectrum of compound <b>1</b>                                                                                                   | <b>S20</b>      |
| <b>Figure S33</b>              | High resolution mass spectrum of compound <b>2</b>                                                                                                   | <b>S20</b>      |
| <b>Figure S34</b>              | High resolution mass spectrum of compound <b>3</b>                                                                                                   | <b>S21</b>      |
| <b>Figure S35</b>              | High resolution mass spectrum of compound <b>5</b>                                                                                                   | <b>S21</b>      |
| <b>Figure S36</b>              | High resolution mass spectrum of compound <b>6</b>                                                                                                   | <b>S22</b>      |
| <b>Figure S37</b>              | High resolution mass spectrum of compound <b>7</b>                                                                                                   | <b>S22</b>      |
| <b>Figure S38</b>              | High resolution mass spectrum of compound <b>8</b>                                                                                                   | <b>S23</b>      |
| <b>Figure S39</b>              | High resolution mass spectrum of compound <b>10</b>                                                                                                  | <b>S23</b>      |
| <b>Figure S40</b>              | High resolution mass spectrum of compound <b>11</b>                                                                                                  | <b>S24</b>      |
| <b>Table S3</b>                | Thermodynamic parameters of the nitrones in water at the PCM/B3LYP/6-31+g**//B3LYP/6-31g* level of theory                                            | <b>S25-S80</b>  |
| <b>Table S4</b>                | Cartesian coordinates                                                                                                                                | <b>S81-S178</b> |

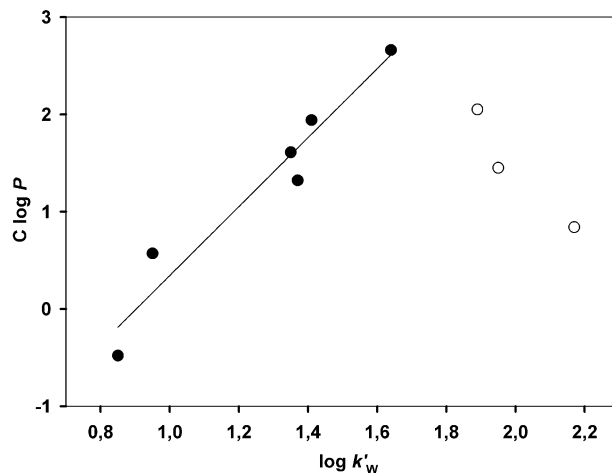

**Figure S1.** Correlation between  $\log k'_w$  and  $C \log P$ . Hydroxylated compounds **1**, **8** and **9** are marked as (○).

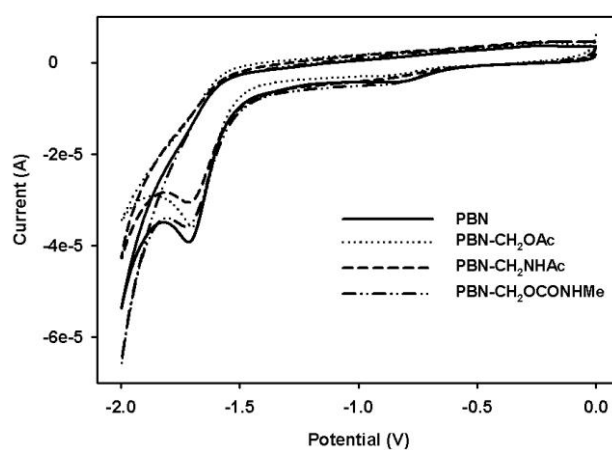

**Figure S2.** Cyclic voltammograms of PBN and compounds **2**, **6** and **7**, reduction in water containing 50 mM of NaCl with a sweep rate of  $0.1 \text{ V.s}^{-1}$ .

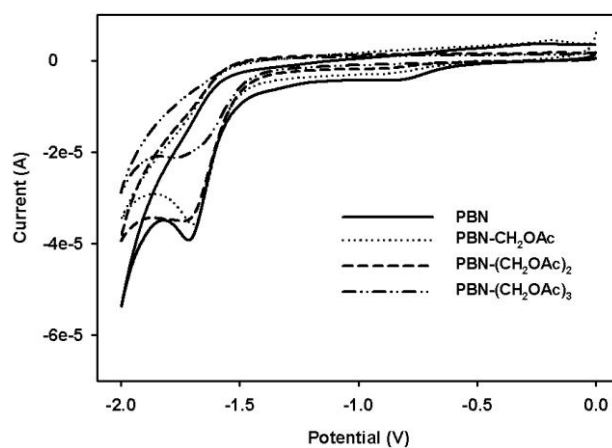

**Figure S3.** Cyclic voltammograms of PBN and compounds **2**, **10** and **11**, reduction in water containing 50 mM of NaCl with a sweep rate of  $0.1 \text{ V.s}^{-1}$ .

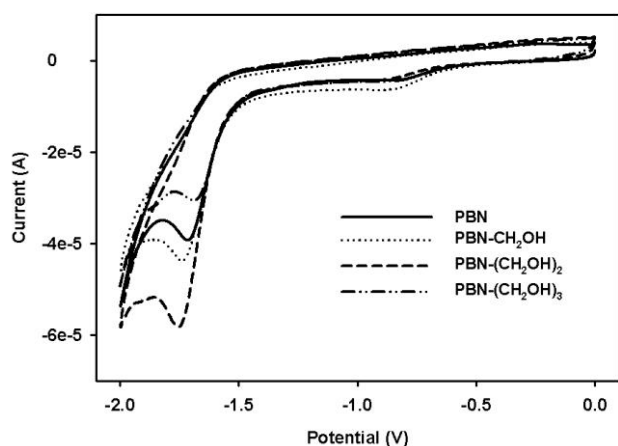

**Figure S4.** Cyclic voltammograms of PBN and compounds **1**, **8** and **9**, reduction in water containing 50 mM of NaCl with a sweep rate of  $0.1 \text{ mV}\cdot\text{s}^{-1}$ .

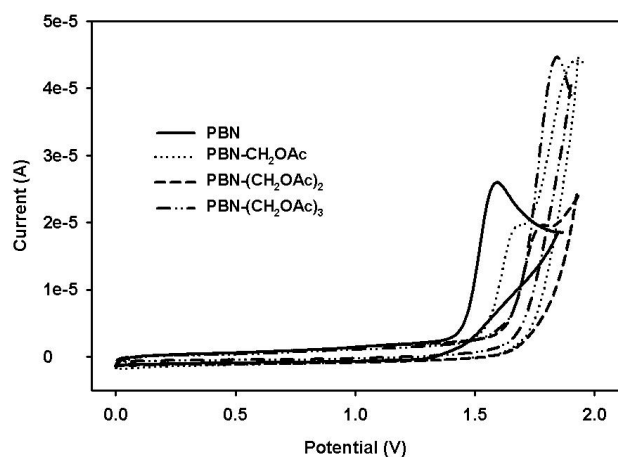

**Figure S5.** Cyclic voltammograms of PBN and compounds **2**, **10** and **11**, oxidation in acetonitrile containing 50 mM of TBAP with a sweep rate of  $0.1 \text{ mV}\cdot\text{s}^{-1}$ .

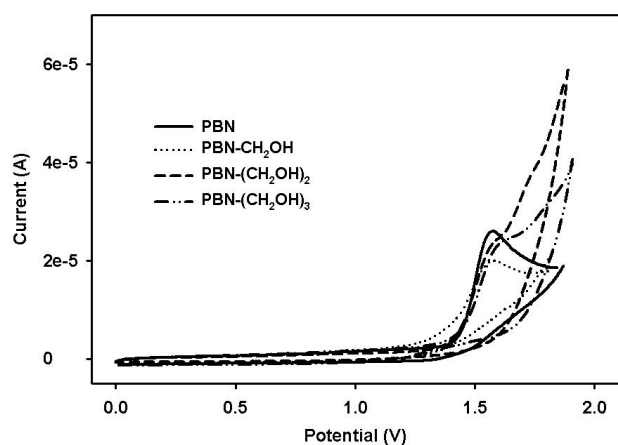

**Figure S6.** Cyclic voltammograms of PBN and compounds **1**, **8** and **9**, oxidation in acetonitrile containing 50 mM of TBAP with a sweep rate of  $0.1 \text{ mV}\cdot\text{s}^{-1}$ .

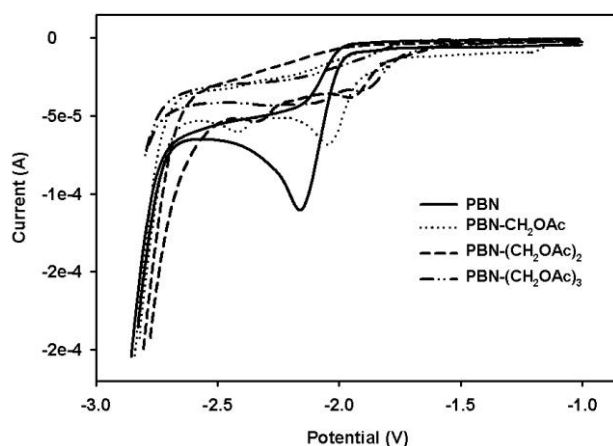

**Figure S7.** Cyclic voltammograms of PBN and compounds **2**, **10** and **11**, reduction in acetonitrile containing 50 mM of TBAP with a sweep rate of 0.1 V.s<sup>-1</sup>.

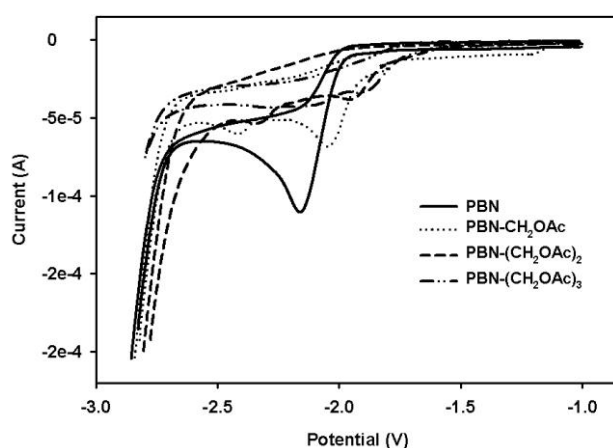

**Figure S8.** Cyclic voltammograms of PBN and compounds **1**, **8** and **9**, reduction in acetonitrile containing 50 mM of TBAP with a sweep rate of 0.1 V.s<sup>-1</sup>.

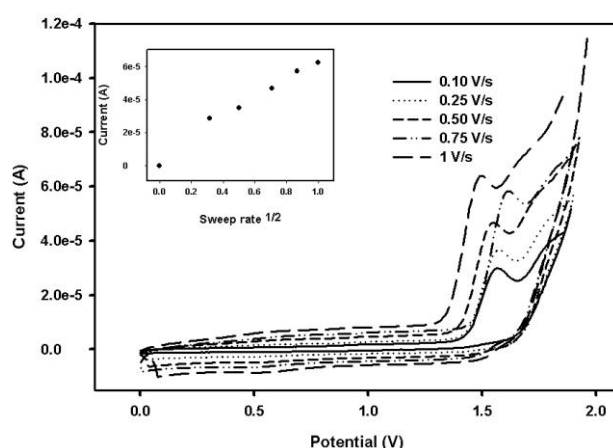

**Figure S9.** Sweep rate variations on PBN oxidation in acetonitrile containing 50 mM of TBAP at sweep rate ranging from 0.1 V.s<sup>-1</sup> to 1 V.s<sup>-1</sup> with corresponding linear regression curve.

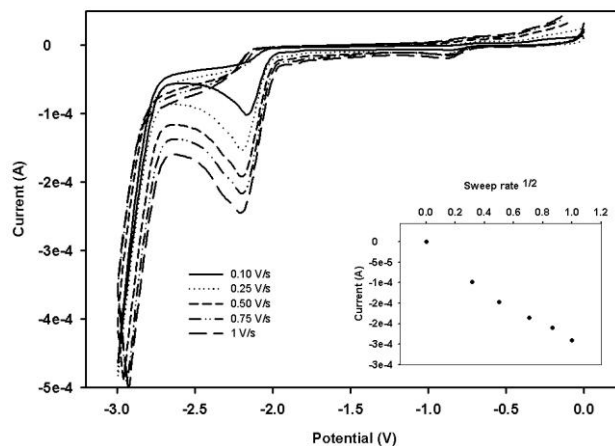

**Figure S10.** Sweep rate variations on PBN reduction in acetonitrile containing 50 mM of TBAP at sweep rate ranging from  $0.1 \text{ V.s}^{-1}$  to  $1 \text{ V.s}^{-1}$  with corresponding linear regression curve.

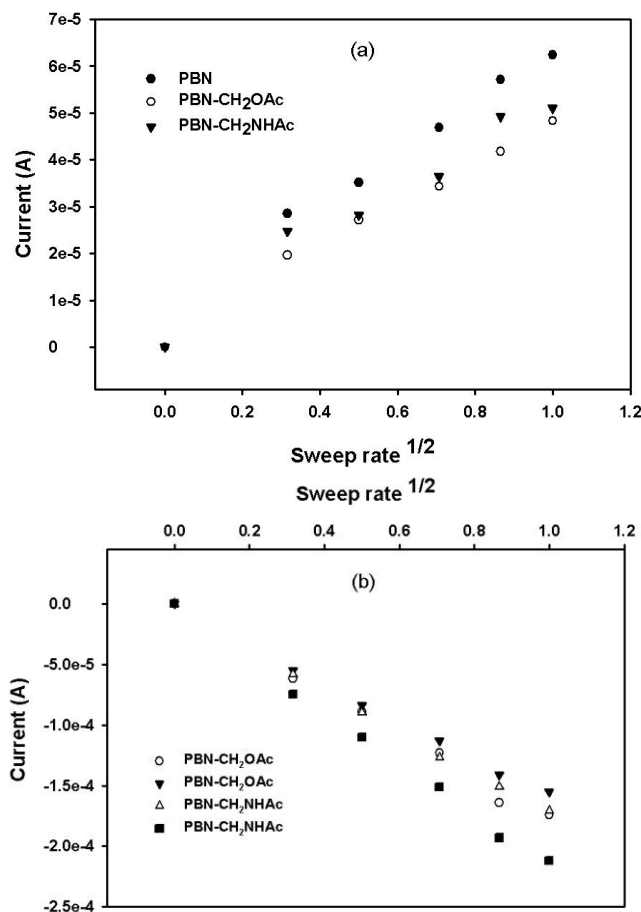

**Figure S11.** Linear regressions corresponding to sweep rate variations on PBN, PBN- $\text{CH}_2\text{OAc}$  and PBN- $\text{CH}_2\text{NHAc}$  oxidation (a) and reduction (b) in acetonitrile containing 50 mM of TBAP at sweep rate ranging from  $0.1 \text{ V.s}^{-1}$  to  $1 \text{ V.s}^{-1}$ .

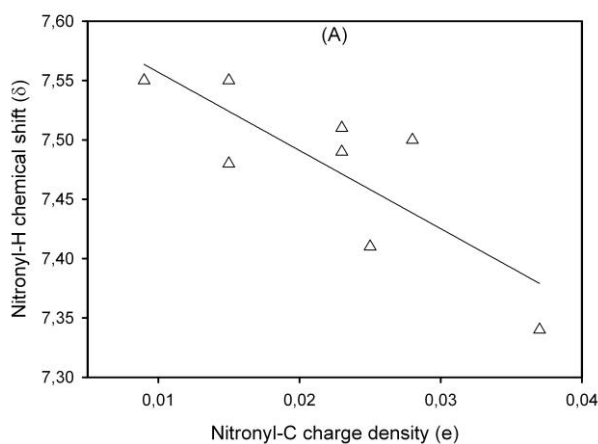

**Figure S12.** Correlation of the nitronyl-carbon charge densities with the nitronyl-H chemical shifts of nitrones **1**, **2**, **6-8**, **10** and **11** ( $R^2 = 0.656$ ) excluding nitrone **9**.

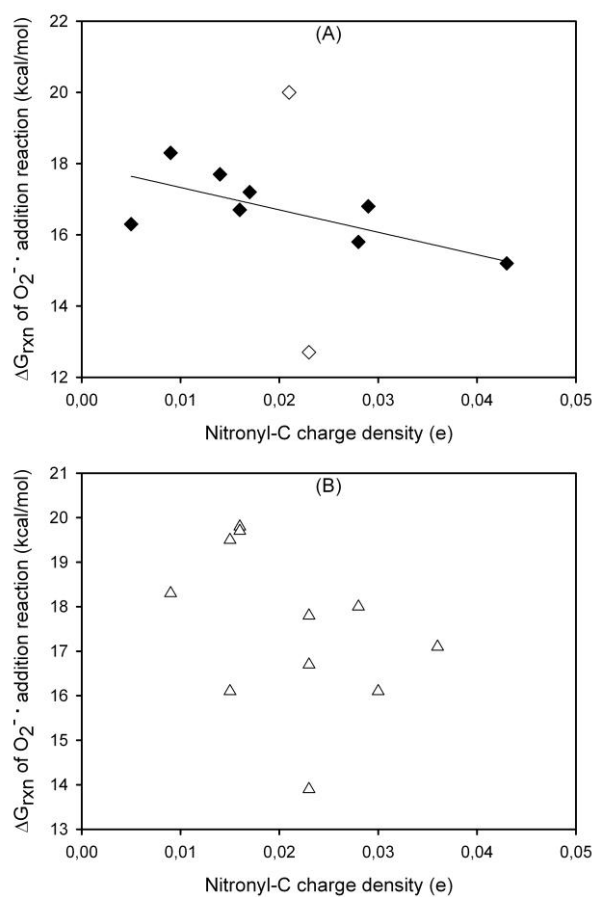

**Figure S13.** Plots of NPA charge densities of the nitronyl carbon of the monosubstituted nitrones versus their free energies ( $\Delta G_{rxn, 298K}$ ) of  $O_2^{\bullet-}$  addition reactions: (A)  $\alpha$ -substituted nitrones ( $\blacklozenge$ ) ( $R^2 = 0.473$ ) excluding  $-P(=O)(OMe)_2$  and  $-NHC(=O)Me$  derivatives ( $\diamond$ ). (B)  $\beta$ -substituted nitrones ( $\triangle$ ) ( $R^2 = 0.169$ ).

**Table S1.** Natural population analysis (NPA) charge densities of the nitronyl- atoms of PBN derivatives at the PCM/B3LYP/6-31+G\*\*//B3LYP/6-31G\* level of theory. In bold are the data for the molecules synthesized.

| Nitrones       |                                          | monosubstitution |              |               | disubstitution |              |               | trisubstitution |              |               |
|----------------|------------------------------------------|------------------|--------------|---------------|----------------|--------------|---------------|-----------------|--------------|---------------|
|                |                                          | C                | N            | O             | C              | N            | O             | C               | N            | O             |
| PBN            | -CH <sub>3</sub>                         | <b>0.009</b>     | <b>0.073</b> | <b>-0.606</b> | n/a            | n/a          | n/a           | n/a             | n/a          | n/a           |
| α-substitution | -COOH                                    | 0.029            | 0.067        | -0.607        | 0.041          | 0.059        | -0.606        | 0.050           | 0.056        | -0.590        |
|                | -C(=O)OMe                                | 0.005            | 0.077        | -0.577        | 0.037          | 0.063        | -0.601        | 0.040           | 0.061        | -0.576        |
|                | -C(=O)NH <sub>2</sub>                    | 0.043            | 0.055        | -0.617        | 0.074          | 0.037        | -0.631        | 0.068           | 0.039        | -0.613        |
|                | -OMe                                     | 0.014            | 0.047        | -0.595        | 0.020          | 0.030        | -0.601        | 0.023           | 0.016        | -0.595        |
|                | -OC(=O)Me                                | 0.028            | 0.050        | -0.596        | 0.034          | 0.028        | -0.592        | 0.040           | 0.012        | -0.577        |
|                | -OC(=O)NHMe                              | 0.016            | 0.049        | -0.601        | 0.049          | 0.017        | -0.617        | 0.049           | 0.018        | -0.584        |
|                | -NHC(=O)Me                               | 0.023            | 0.057        | -0.609        | 0.005          | 0.055        | -0.583        | 0.004           | 0.046        | -0.564        |
|                | -SMe                                     | 0.017            | 0.057        | -0.596        | 0.012          | 0.048        | -0.584        | 0.014           | 0.035        | -0.567        |
|                | -P(=O)(OMe) <sub>2</sub>                 | 0.021            | 0.048        | -0.586        | 0.031          | 0.047        | -0.575        | 0.051           | 0.028        | -0.582        |
| β-substitution | -CH <sub>2</sub> OH                      | <b>0.015</b>     | <b>0.070</b> | <b>-0.608</b> | <b>0.015</b>   | <b>0.074</b> | <b>-0.605</b> | <b>0.023</b>    | <b>0.062</b> | <b>-0.613</b> |
|                | -CH <sub>2</sub> OC(=O)Me                | <b>0.023</b>     | <b>0.065</b> | <b>-0.608</b> | <b>0.025</b>   | <b>0.062</b> | <b>-0.605</b> | <b>0.037</b>    | <b>0.053</b> | <b>-0.608</b> |
|                | -CH <sub>2</sub> NHC(=O)Me               | <b>0.028</b>     | <b>0.063</b> | <b>-0.619</b> | 0.035          | 0.059        | -0.620        | 0.052           | 0.049        | -0.624        |
|                | -CH <sub>2</sub> OC(=O)NHMe              | <b>0.023</b>     | <b>0.066</b> | <b>-0.608</b> | 0.041          | 0.150        | -0.241        | 0.027           | 0.056        | -0.596        |
|                | -CH <sub>2</sub> C(=O)NH <sub>2</sub>    | 0.036            | 0.054        | -0.621        | 0.061          | 0.042        | -0.633        | 0.038           | 0.050        | -0.609        |
|                | -CH <sub>2</sub> C(=O)OMe                | 0.023            | 0.067        | -0.610        | 0.034          | 0.061        | -0.611        | 0.034           | 0.063        | -0.604        |
|                | -CH <sub>2</sub> OMe                     | 0.016            | 0.070        | -0.607        | 0.020          | 0.067        | -0.609        | 0.022           | 0.066        | -0.610        |
|                | -CH <sub>2</sub> P(=O)(OMe) <sub>2</sub> | 0.030            | 0.054        | -0.609        | 0.024          | 0.055        | -0.601        | 0.008           | 0.068        | -0.566        |
|                | -CH <sub>2</sub> SMe                     | 0.016            | 0.070        | -0.604        | 0.018          | 0.071        | -0.597        | 0.022           | 0.067        | -0.594        |



**Table S2.** Natural bond orbital (NBO) analysis showing the percent electron localization on the polar  $\sigma$  C-N and N-O (in parentheses); and  $\pi$  C-N bonds at the B3LYP/6-31+G\*\* level of theory.

| Nitrones                                          |                                   | monosubstitution             |               |               | disubstitution |               |               | trisubstitution |               |               |       |
|---------------------------------------------------|-----------------------------------|------------------------------|---------------|---------------|----------------|---------------|---------------|-----------------|---------------|---------------|-------|
|                                                   |                                   | C                            | N             | O             | C              | N             | O             | C               | N             | O             |       |
| PBN                                               | -CH <sub>3</sub> $\sigma$         | 37.07                        | 62.93 (50.13) | 49.87         | n/a            | n/a           | n/a           | n/a             | n/a           | n/a           |       |
|                                                   | $\pi$                             | 40.32                        | 59.68         |               | n/a            | n/a           | n/a           | n/a             | n/a           | n/a           |       |
| $\alpha$ -substitution                            | -COOH $\sigma$                    | 36.87                        | 63.13 (50.45) | 49.55         | 36.49          | 63.51 (50.62) | 49.38         | 36.96           | 63.61 (50.78) | 49.22         |       |
|                                                   | $\pi$                             | 39.16                        | 60.84         |               | 37.12          | 62.88         |               | 36.19           | 63.81         |               |       |
|                                                   | -C(=O)OMe $\sigma$                | 37.02                        | 62.98 (50.17) | 49.83         | 36.54          | 63.46 (50.54) | 49.46         | 36.52           | 63.48 (50.67) | 49.33         |       |
|                                                   | $\pi$                             | 39.85                        | 60.15         |               | 37.45          | 62.55         |               | 36.98           | 63.02         |               |       |
|                                                   | -C(=O)NH <sub>2</sub> $\sigma$    | 37.01                        | 62.99 (50.16) | 49.84         | 36.93          | 63.07 (50.19) | 49.81         | 36.71           | 63.29 (50.61) | 49.39         |       |
|                                                   | $\pi$                             | 38.41                        | 61.59         |               | 36.72          | 63.28         |               | 36.21           | 63.79         |               |       |
|                                                   | -OMe $\sigma$                     | 37.19                        | 62.81 (50.12) | 49.88         | 36.97          | 63.03 (50.32) | 49.68         | 37.05           | 62.95 (50.27) | 49.73         |       |
|                                                   | $\pi$                             | 39.91                        | 60.09         |               | 38.36          | 61.64         |               | 37.93           | 62.07         |               |       |
|                                                   | -OC(=O)Me $\sigma$                | 36.97                        | 63.03 (50.33) | 49.67         | 36.83          | 63.17 (50.41) | 49.59         | 36.76           | 63.24 (50.89) | 49.11         |       |
|                                                   | $\pi$                             | 38.96                        | 61.04         |               | 37.45          | 62.55         |               | 36.79           | 63.21         |               |       |
|                                                   | -OC(=O)NHMe $\sigma$              | 36.93                        | 63.07 (50.39) | 49.61         | 36.91          | 63.09 (50.19) | 49.81         | 37.10           | 62.90 (50.14) | 49.86         |       |
|                                                   | $\pi$                             | 39.29                        | 60.71         |               | 36.62          | 63.38         |               | 36.92           | 63.08         |               |       |
|                                                   | -NHC(=O)Me $\sigma$               | 37.06                        | 62.94 (50.13) | 49.87         | 37.19          | 62.18 (49.95) | 50.05         | 37.39           | 62.61 (49.62) | 50.38         |       |
|                                                   | $\pi$                             | 39.13                        | 60.87         |               | 40.01          | 59.99         |               | 39.73           | 60.27         |               |       |
|                                                   | -SMe $\sigma$                     | 36.93                        | 63.07 (50.24) | 49.76         | 36.77          | 63.23 (50.39) | 49.61         | 36.79           | 63.21 (50.26) | 49.74         |       |
|                                                   | $\pi$                             | 39.52                        | 60.48         |               | 39.08          | 60.92         |               | 38.21           | 61.79         |               |       |
|                                                   | -P(=O)(OMe) <sub>2</sub> $\sigma$ | 36.90                        | 63.10 (50.38) | 49.62         | 36.59          | 63.41 (50.44) | 49.56         | 36.38           | 63.62 (50.49) | 49.51         |       |
|                                                   | $\pi$                             | 38.30                        | 61.70         |               | 37.84          | 62.16         |               | 36.09           | 63.91         |               |       |
|                                                   | $\beta$ -substitution             | -CH <sub>2</sub> OH $\sigma$ | 37.01         | 62.99 (50.22) | 49.78          | 36.99         | 63.01 (50.22) | 49.78           | 36.76         | 63.24 (50.33) | 49.67 |
|                                                   |                                   | $\pi$                        | 39.88         | 60.12         |                | 40.12         | 59.88         |                 | 37.95         | 62.05         |       |
| -CH <sub>2</sub> OC(=O)Me $\sigma$                |                                   | 36.96                        | 63.04 (50.29) | 49.71         | 36.85          | 63.15 (50.29) | 49.71         | 36.73           | 63.27 (50.49) | 49.51         |       |
| $\pi$                                             |                                   | 39.43                        | 60.57         |               | 38.38          | 61.62         |               | 37.34           | 62.66         |               |       |
| -CH <sub>2</sub> NHC(=O)Me $\sigma$               |                                   | 37.06                        | 62.94 (50.08) | 49.92         | 36.98          | 63.02 (50.16) | 49.84         | 36.96           | 63.04 (50.16) | 49.84         |       |
| $\pi$                                             |                                   | 39.41                        | 60.59         |               | 38.68          | 61.32         |               | 38.08           | 61.92         |               |       |
| -CH <sub>2</sub> OC(=O)NHMe $\sigma$              |                                   | 36.96                        | 63.04 (50.29) | 49.71         | 36.86          | 63.14 (50.39) | 49.61         | 36.82           | 63.18 (50.46) | 49.54         |       |
| $\pi$                                             |                                   | 39.46                        | 60.54         |               | 38.43          | 61.57         |               | 37.82           | 62.18         |               |       |
| -CH <sub>2</sub> C(=O)NH <sub>2</sub> $\sigma$    |                                   | 37.07                        | 62.93 (50.15) | 49.85         | 37.12          | 62.88 (49.93) | 50.07         | 37.00           | 63.00 (50.26) | 49.74         |       |
| $\pi$                                             |                                   | 38.82                        | 61.18         |               | 37.68          | 62.32         |               | 38.14           | 61.86         |               |       |
| -CH <sub>2</sub> C(=O)OMe $\sigma$                |                                   | 36.97                        | 63.03 (50.22) | 49.78         | 36.94          | 63.06 (50.24) | 49.76         | 36.75           | 63.25 (50.19) | 49.81         |       |
| $\pi$                                             |                                   | 39.29                        | 60.71         |               | 38.79          | 61.21         |               | 38.70           | 61.30         |               |       |
| -CH <sub>2</sub> OMe $\sigma$                     |                                   | 37.01                        | 62.99 (50.23) | 49.77         | 36.93          | 63.07 (50.31) | 49.69         | 36.81           | 63.19 (50.34) | 49.66         |       |
| $\pi$                                             |                                   | 39.92                        | 60.08         |               | 39.54          | 60.46         |               | 38.65           | 61.35         |               |       |
| -CH <sub>2</sub> P(=O)(OMe) <sub>2</sub> $\sigma$ | 36.97                             | 63.03 (50.27)                | 49.73         | 37.03         | 62.97 (50.16)  | 49.84         | 37.06         | 62.94 (49.71)   | 50.29         |               |       |

**Complete reference (50):**

Frisch, M. J.; Trucks, G. W.; Schlegel, H. B.; Scuseria, G. E.; Robb, M. A.; Cheeseman, J. R.; Montgomery, J. A., Jr.; Vreven, T.; Kudin, K. N.; Burant, J. C.; Millam, J. M.; Iyengar, S. S.; Tomasi, J.; Barone, V.; Mennucci, B.; Cossi, M.; Scalmani, G.; Rega, N.; Petersson, G. A.; Nakatsuji, H.; Hada, M.; Ehara, M.; Toyota, K.; Fukuda, R.; Hasegawa, J.; Ishida, M.; Nakajima, T.; Honda, Y.; Kitao, O.; Nakai, H.; Klene, M.; Li, X.; Knox, J. E.; Hratchian, H. P.; Cross, J. B.; Bakken, V.; Adamo, C.; Jaramillo, J.; Gomperts, R.; Stratmann, R. E.; Yazyev, O.; Austin, A. J.; Cammi, R.; Pomelli, C.; Ochterski, J. W.; Ayala, P. Y.; Morokuma, K.; Voth, G. A.; Salvador, P.; Dannenberg, J. J.; Zakrzewski, V. G.; Dapprich, S.; Daniels, A. D.; Strain, M. C.; Farkas, O.; Malick, D. K.; Rabuck, A. D.; Raghavachari, K.; Foresman, J. B.; Ortiz, J. V.; Cui, Q.; Baboul, A. G.; Clifford, S.; Cioslowski, J.; Stefanov, B. B.; Liu, G.; Liashenko, A.; Piskorz, P.; Komaromi, I.; Martin, R. L.; Fox, D. J.; Keith, T.; Al-Laham, M. A.; Peng, C. Y.; Nanayakkara, A.; Challacombe, M.; Gill, P. M. W.; Johnson, B.; Chen, W.; Wong, M. W.; Gonzalez, C.; Pople, J. A.; Revision B.01 ed.; Gaussian, Inc., Wallingford CT, 2004; Pittsburgh PA, 2003.

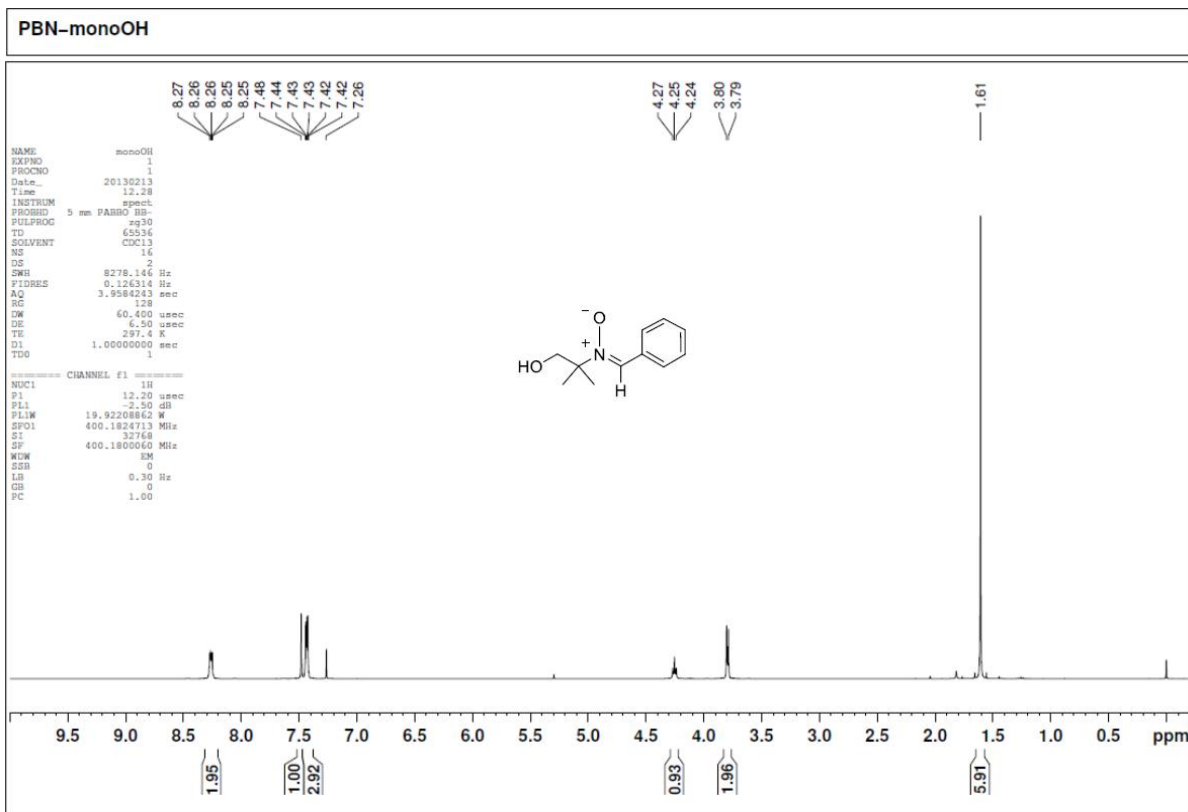

**Figure S14.**  $^1\text{H}$  NMR spectrum of compound **1** in  $\text{CDCl}_3$ .

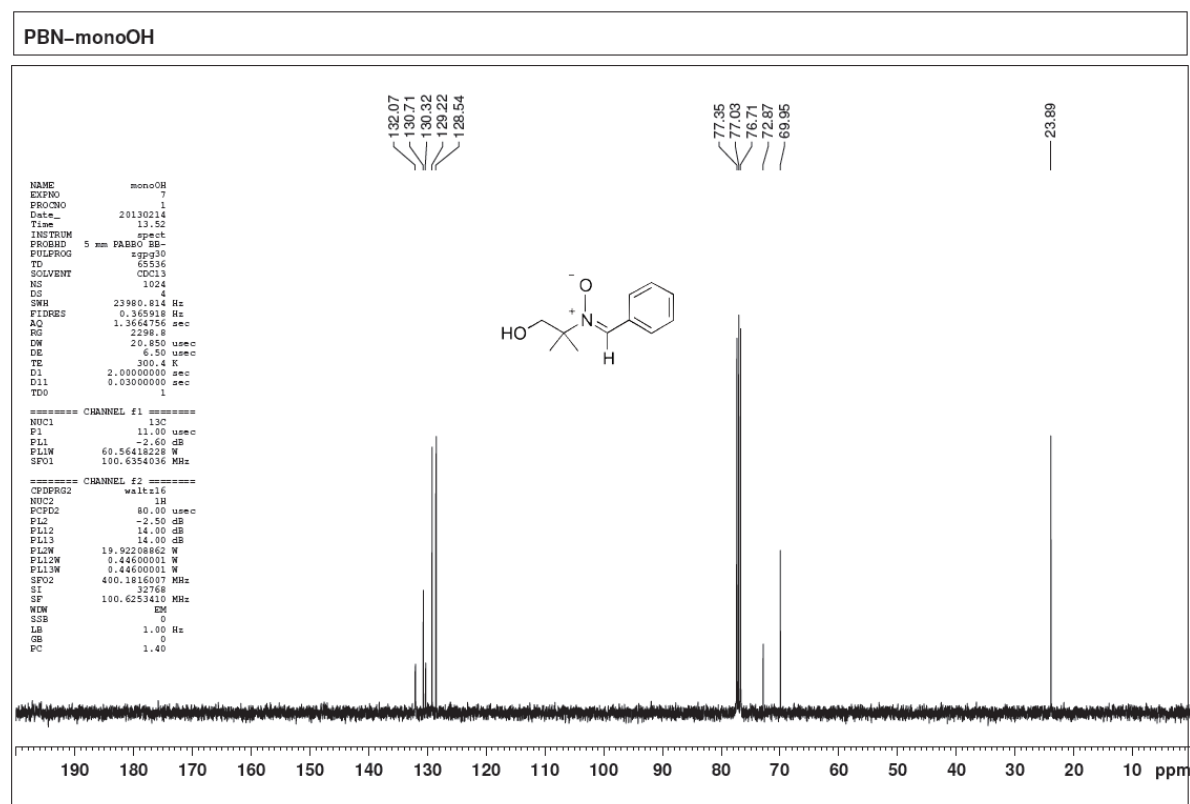

**Figure S15.**  $^{13}\text{C}$  NMR spectrum of compound **1** in  $\text{CDCl}_3$ .

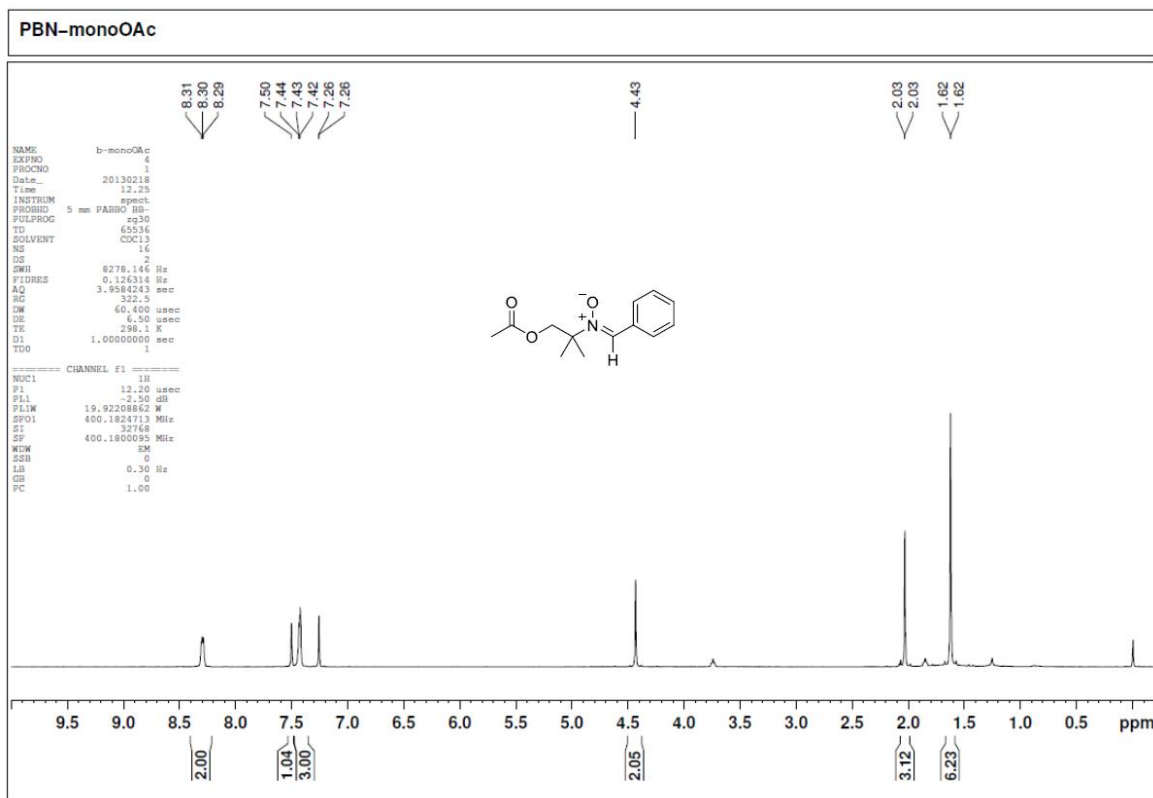

**Figure S16.**  $^1\text{H}$  NMR spectrum of compound **2** in  $\text{CDCl}_3$ .

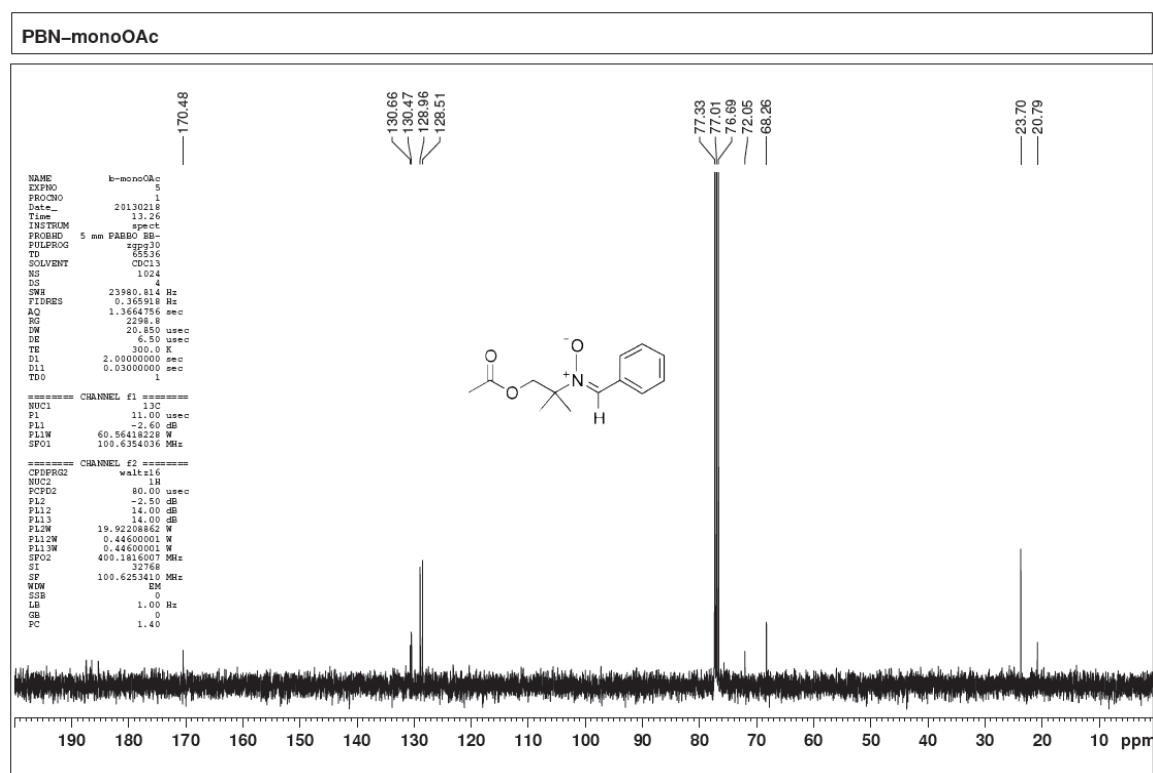

**Figure S17.**  $^{13}\text{C}$  NMR spectrum of compound **2** in  $\text{CDCl}_3$

NO<sub>2</sub>-C(CH<sub>3</sub>)<sub>2</sub>-CH<sub>2</sub>-OCONH-CH<sub>3</sub>

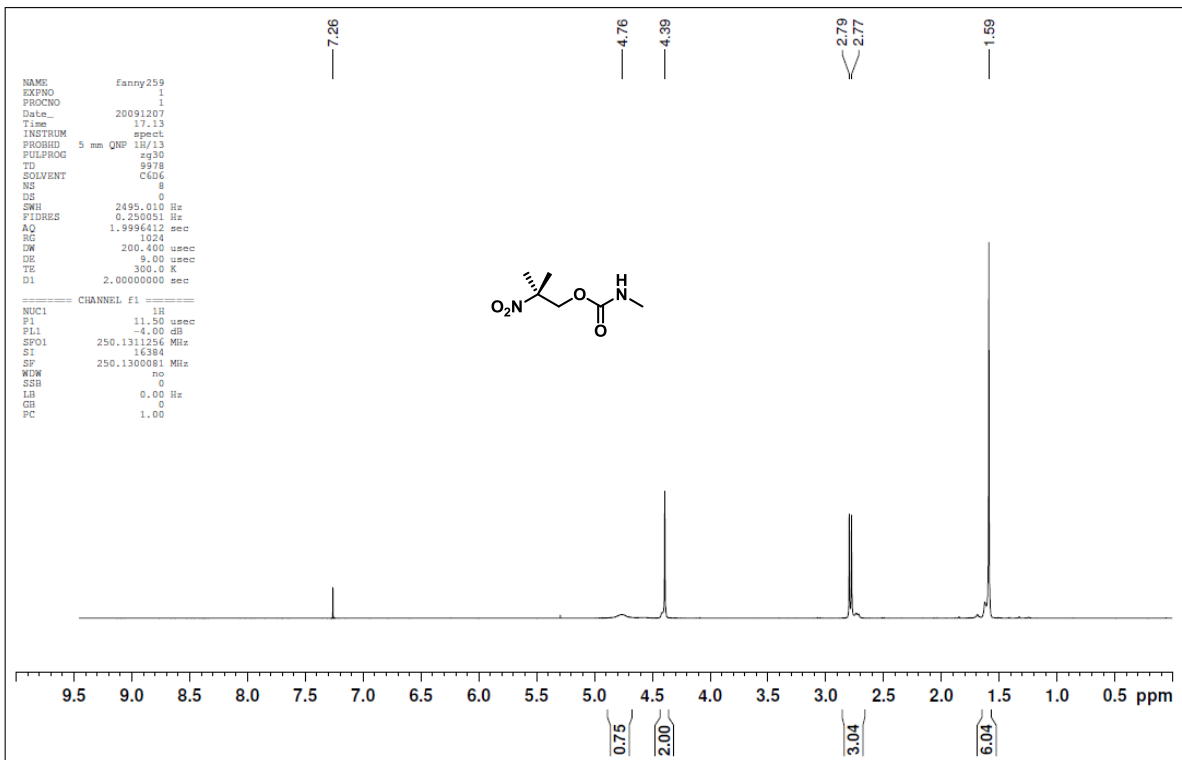

Figure S18. <sup>1</sup>H NMR spectrum of compound 3 in CDCl<sub>3</sub>

NO<sub>2</sub>-C(CH<sub>3</sub>)<sub>2</sub>-CH<sub>2</sub>-OCONH-CH<sub>3</sub>

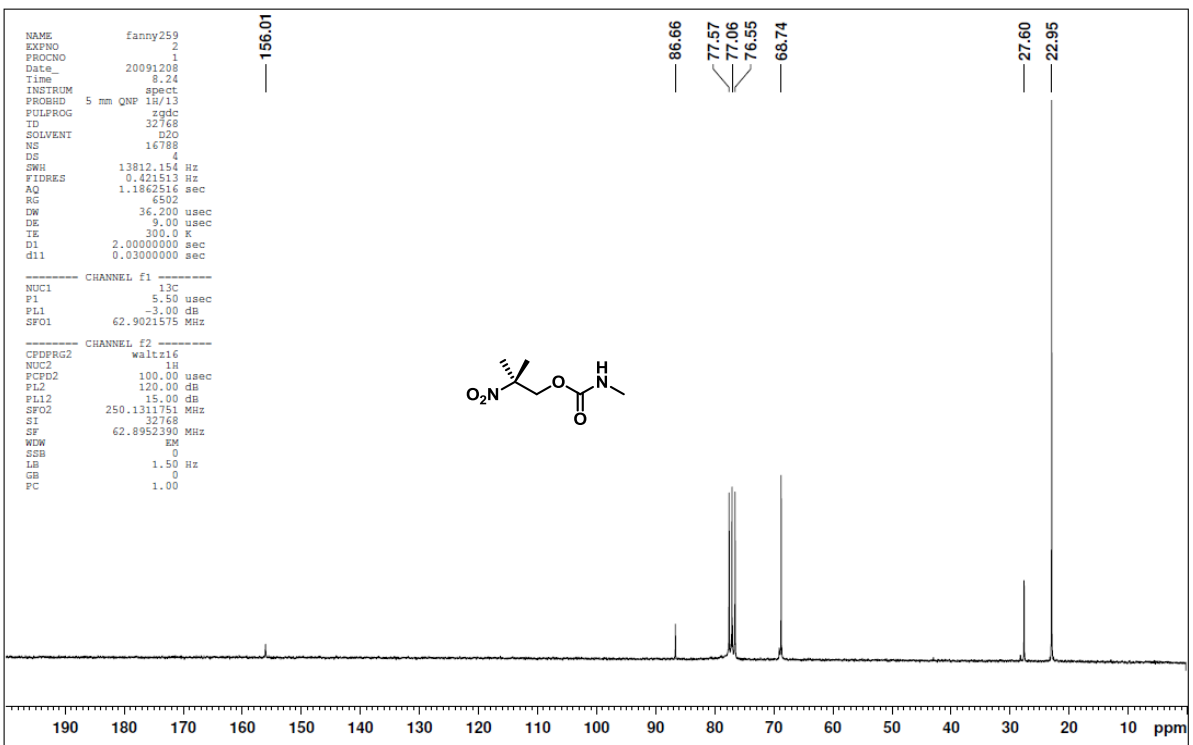

Figure S19. <sup>13</sup>C NMR spectrum of compound 3 in CDCl<sub>3</sub>

NO<sub>2</sub>-C(CH<sub>3</sub>)<sub>2</sub>-CH<sub>2</sub>-NHCO-CH<sub>3</sub>

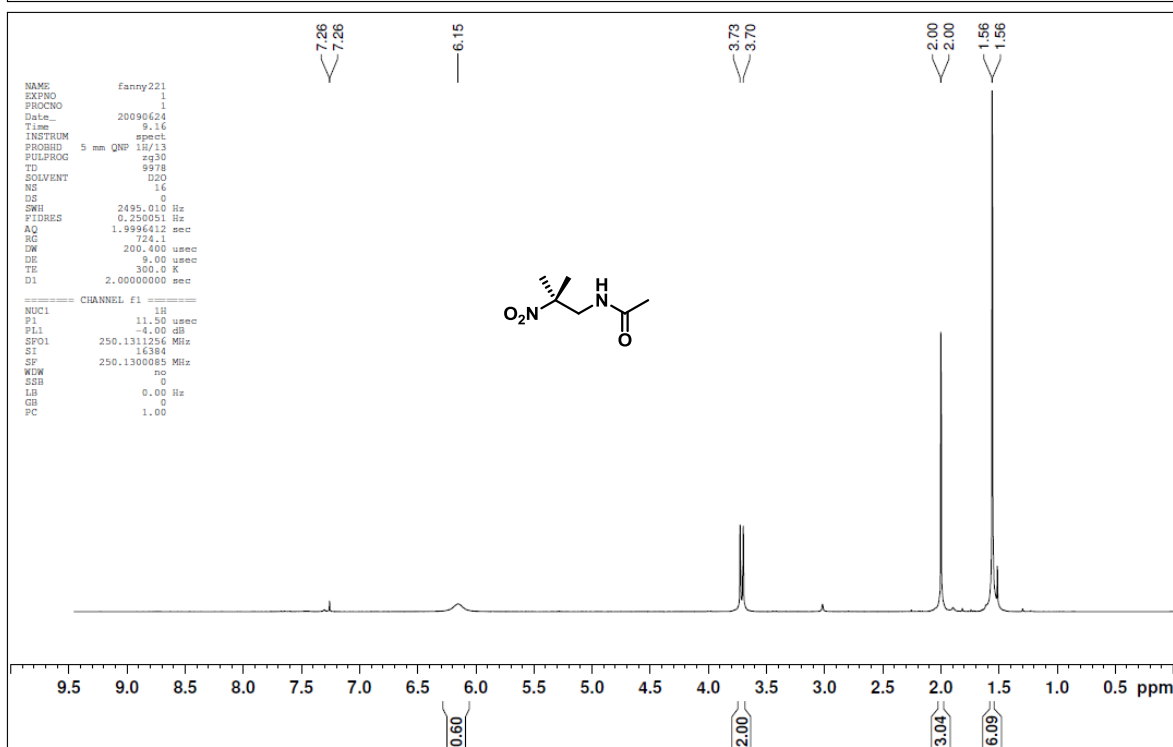

Figure S20. <sup>1</sup>H NMR spectrum of compound **5** in CDCl<sub>3</sub>

NO<sub>2</sub>-C(CH<sub>3</sub>)<sub>2</sub>-CH<sub>2</sub>-NHCO-CH<sub>3</sub>

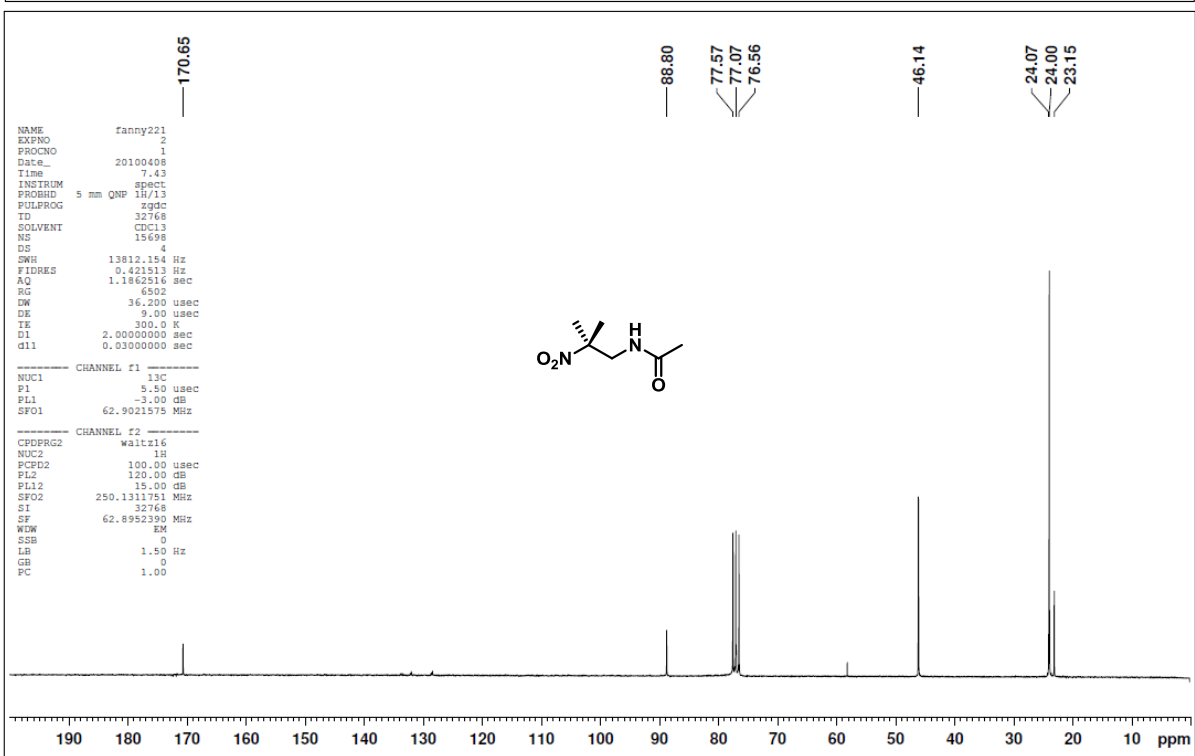

Figure S21. <sup>13</sup>C NMR spectrum of compound **5** in CDCl<sub>3</sub>

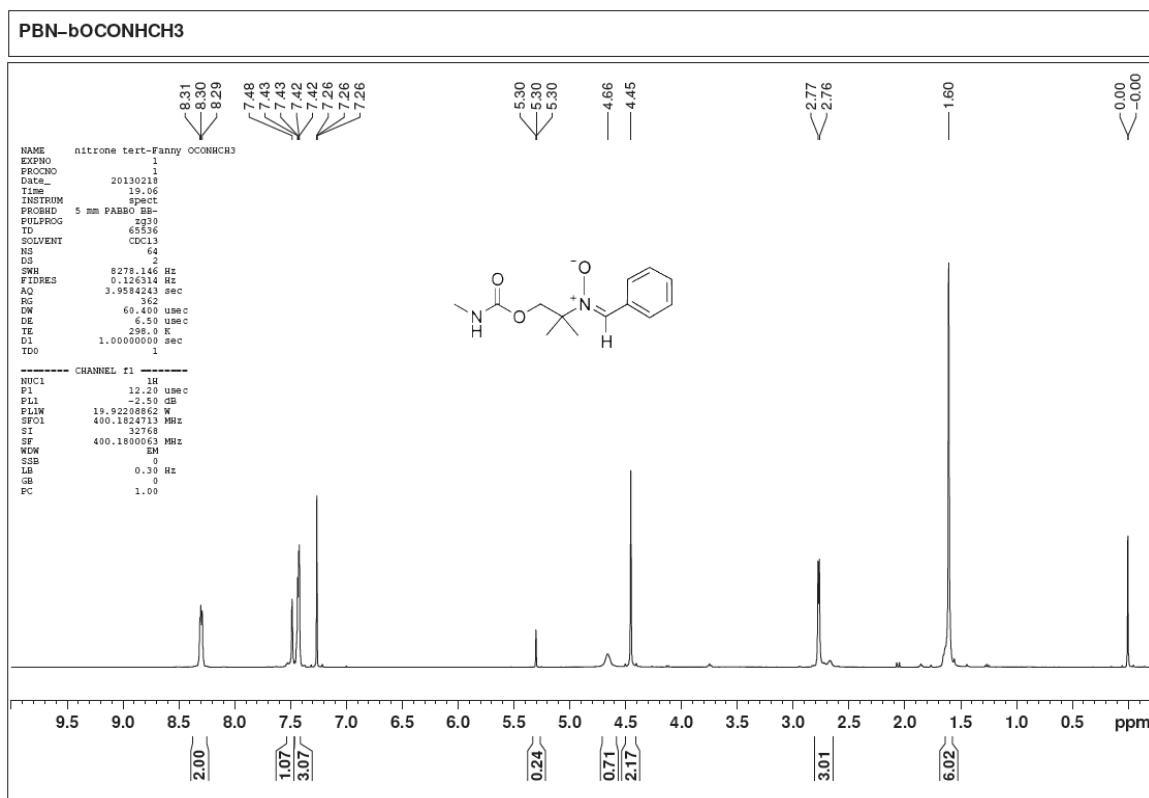

Figure S22.  $^1\text{H}$  NMR spectrum of compound **6** in  $\text{CDCl}_3$ .

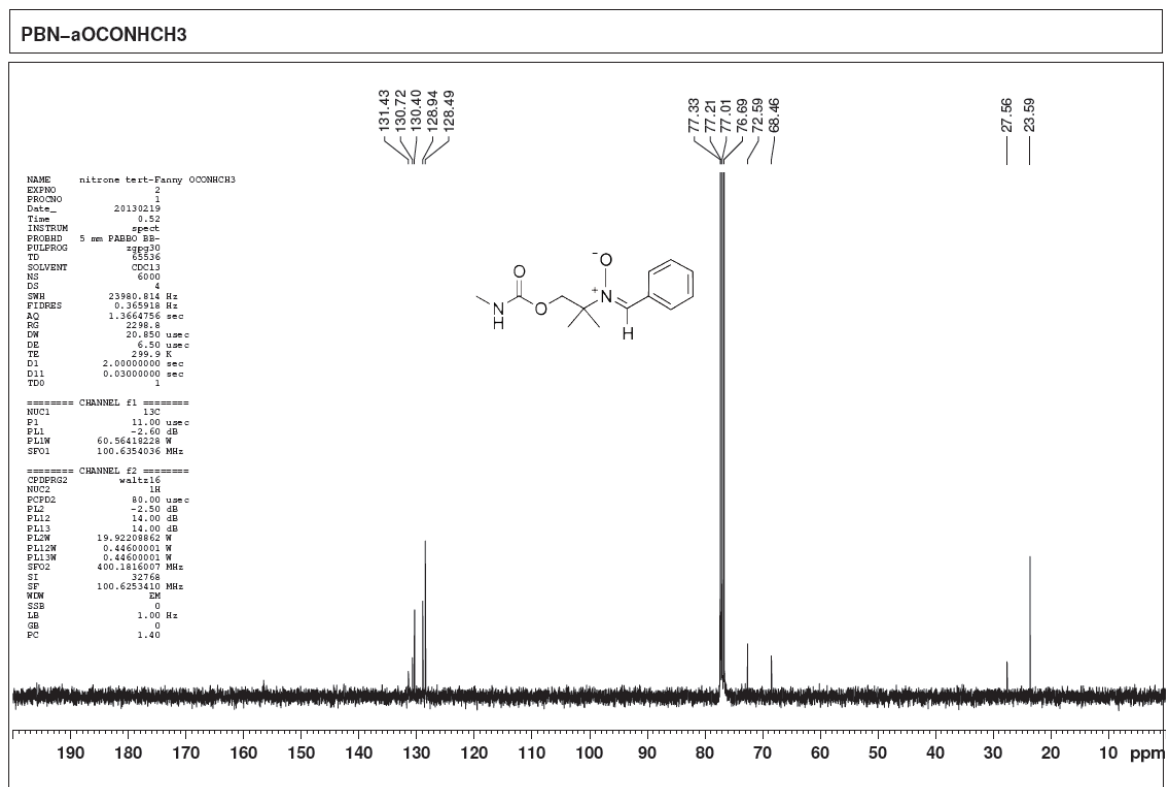

Figure S23.  $^{13}\text{C}$  NMR spectrum of compound **6** in  $\text{CDCl}_3$ .

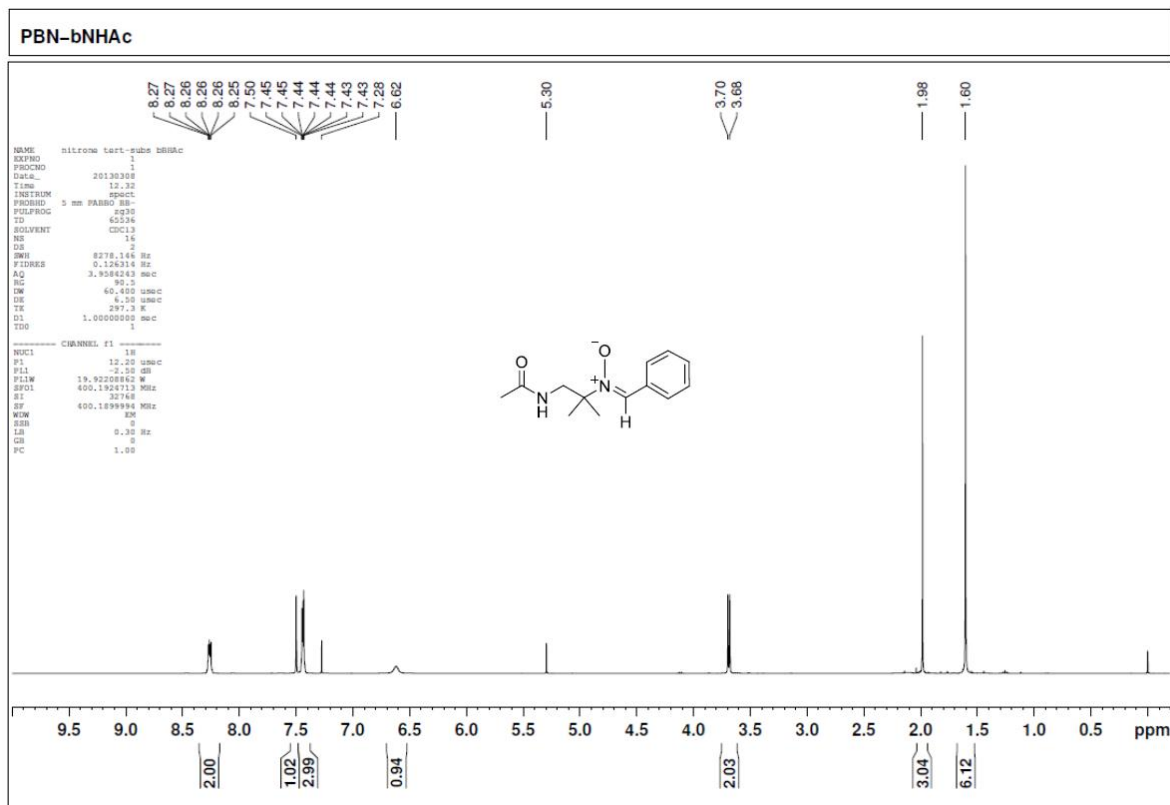

Figure S24.  $^1\text{H}$  NMR spectrum of compound 7 in  $\text{CDCl}_3$ .

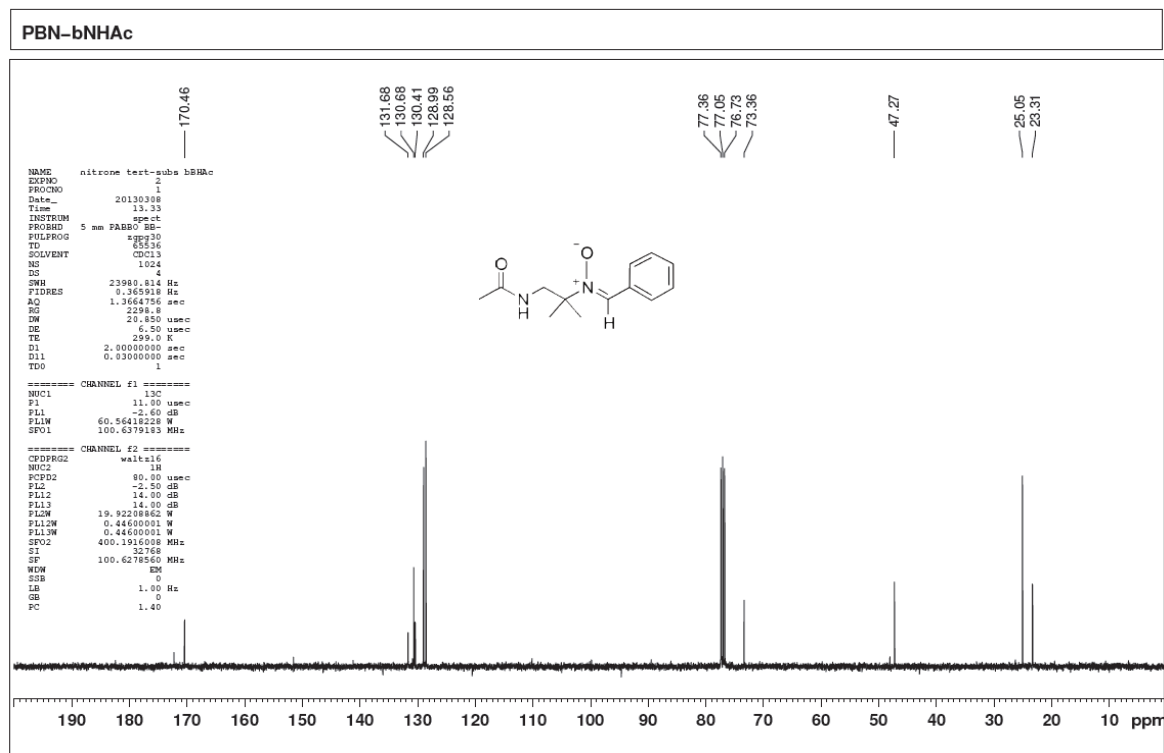

Figure S25.  $^{13}\text{C}$  NMR spectrum of compound 7 in  $\text{CDCl}_3$



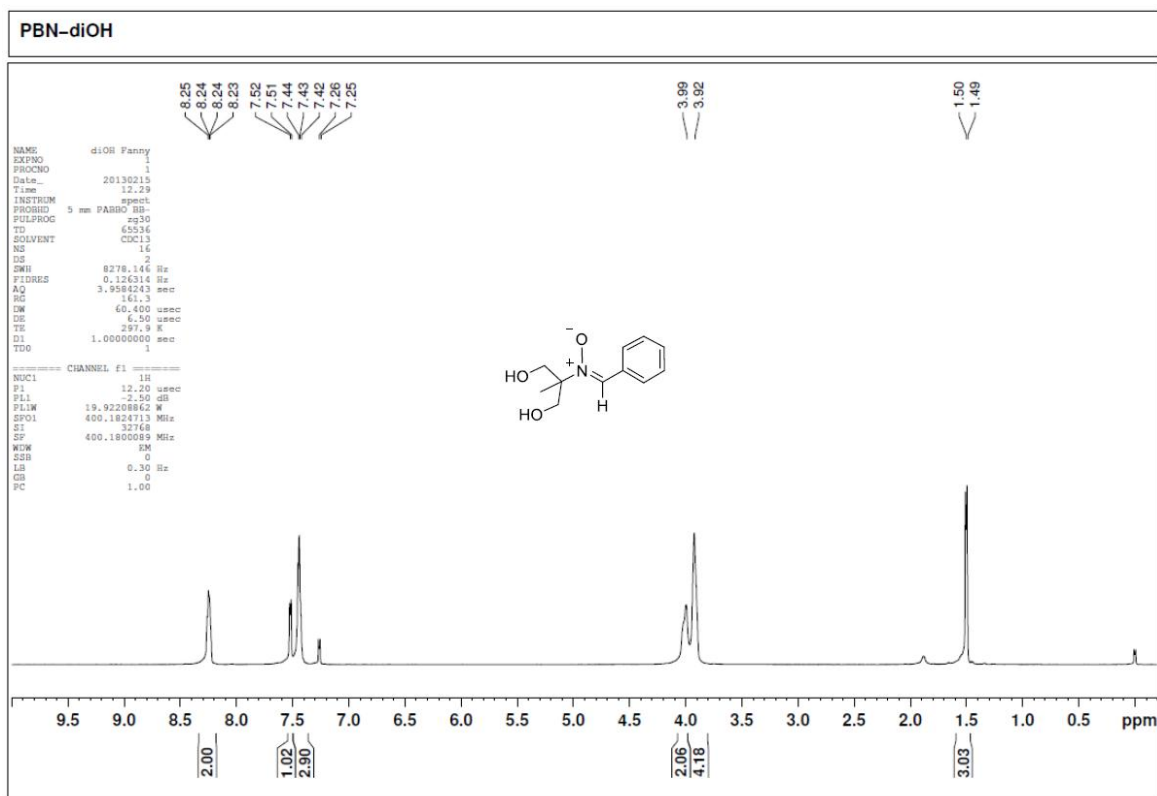

**Figure S26.**  $^1\text{H}$  NMR spectrum of compound **8** in  $\text{CDCl}_3$ .

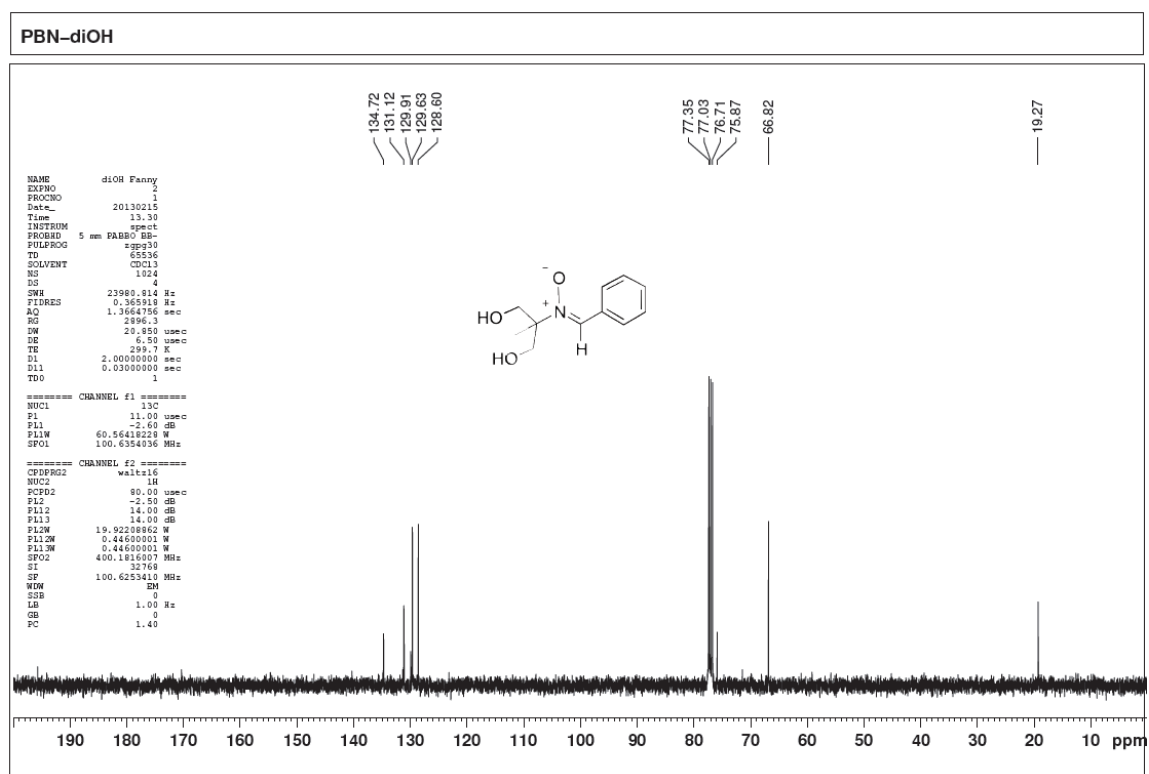

**Figure S27.**  $^{13}\text{C}$  NMR spectrum of compound **8** in  $\text{CDCl}_3$ .

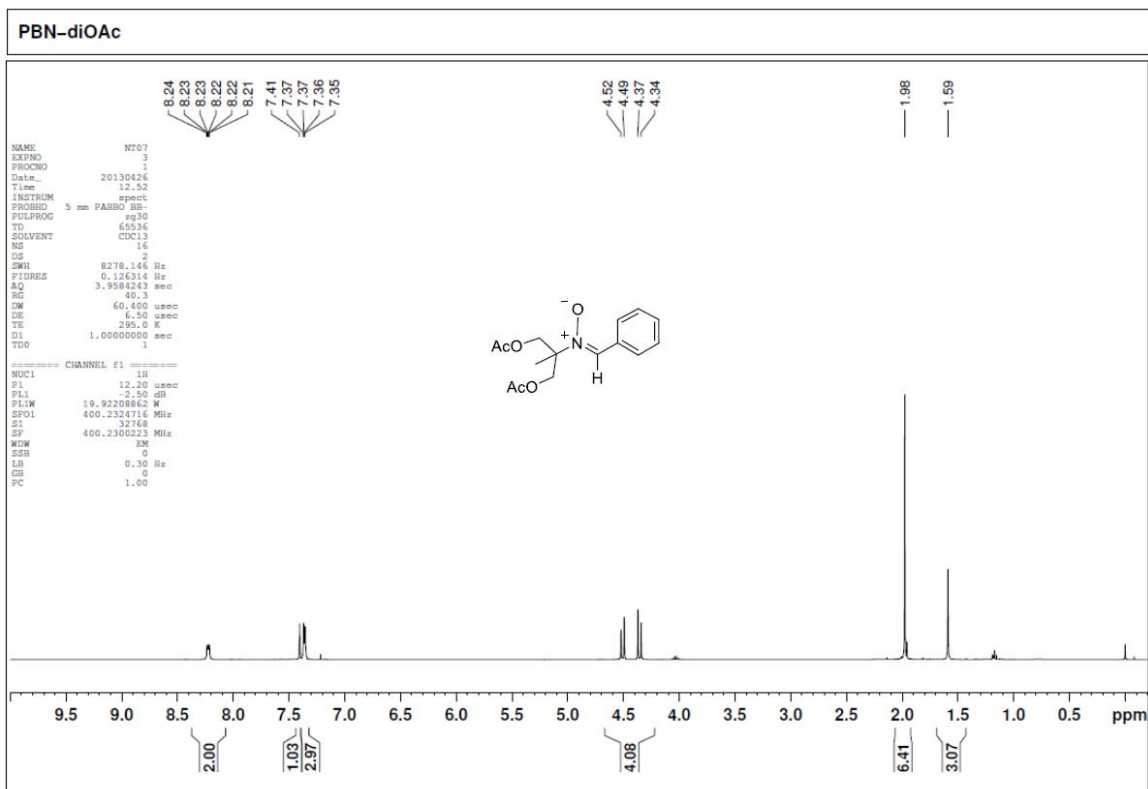

**Figure S28.**  $^1\text{H}$  NMR spectrum of compound **10** in  $\text{CDCl}_3$ .

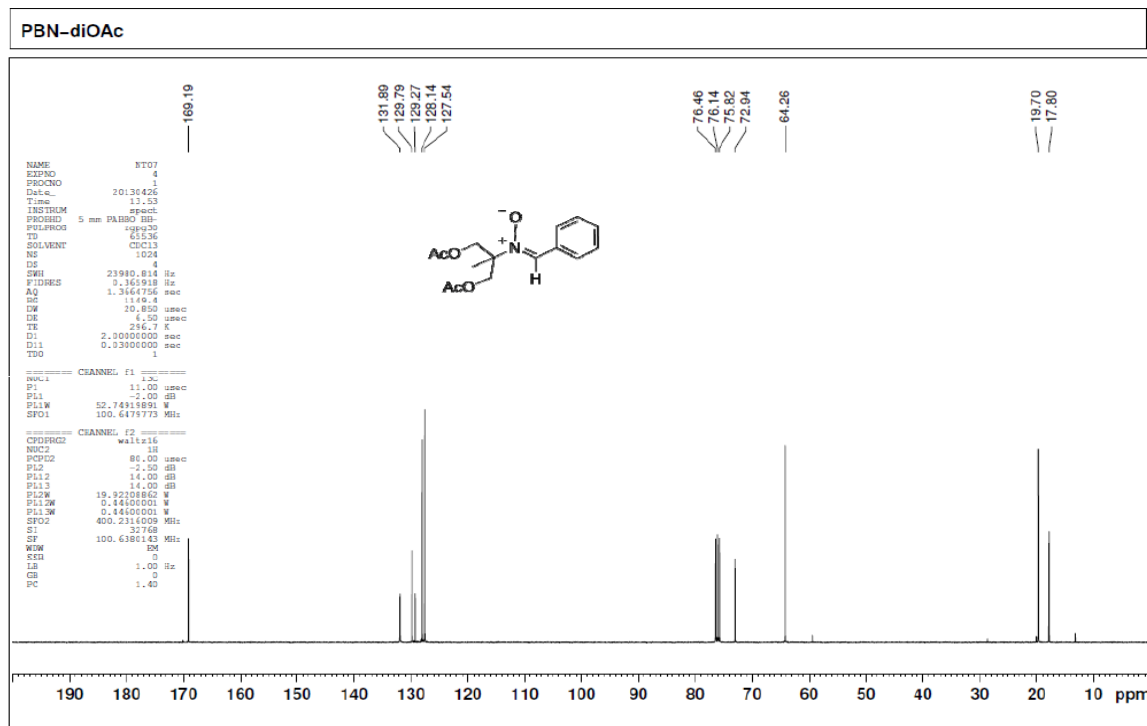

**Figure S29.**  $^{13}\text{C}$  NMR spectrum of compound **10** in  $\text{CDCl}_3$ .

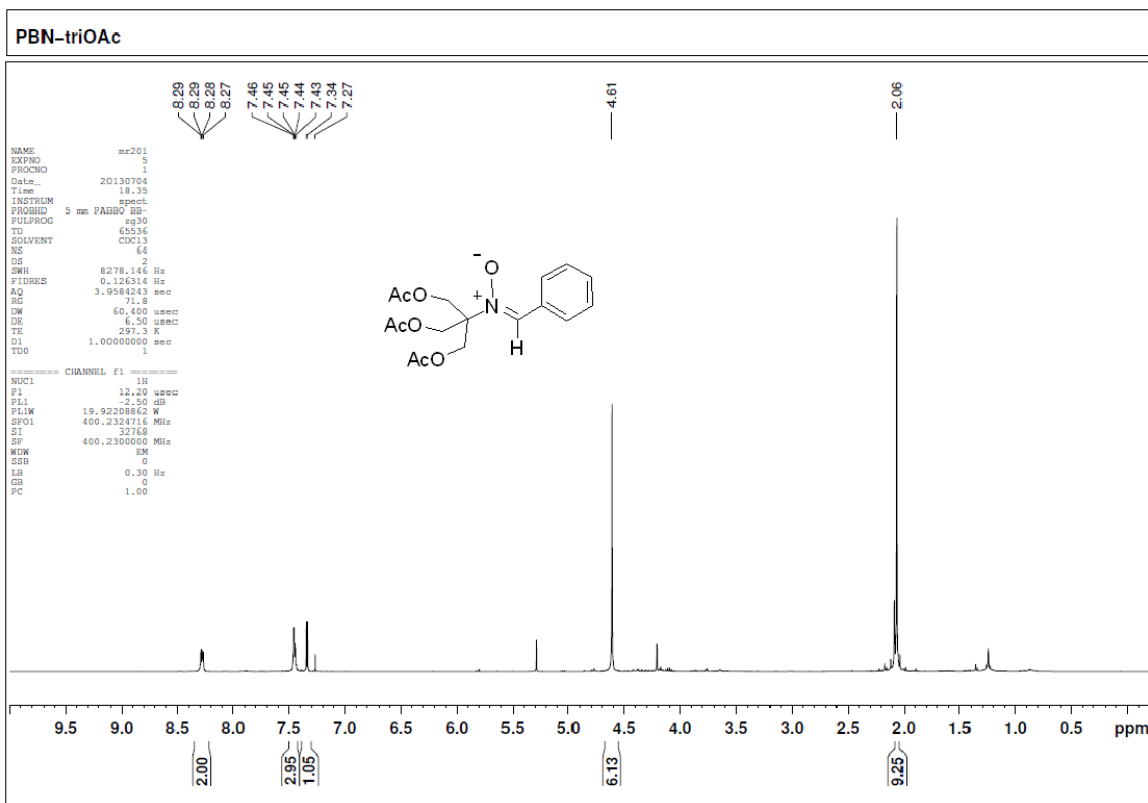

**Figure S30.**  $^1\text{H}$  NMR spectrum of compound **11** in  $\text{CDCl}_3$ .

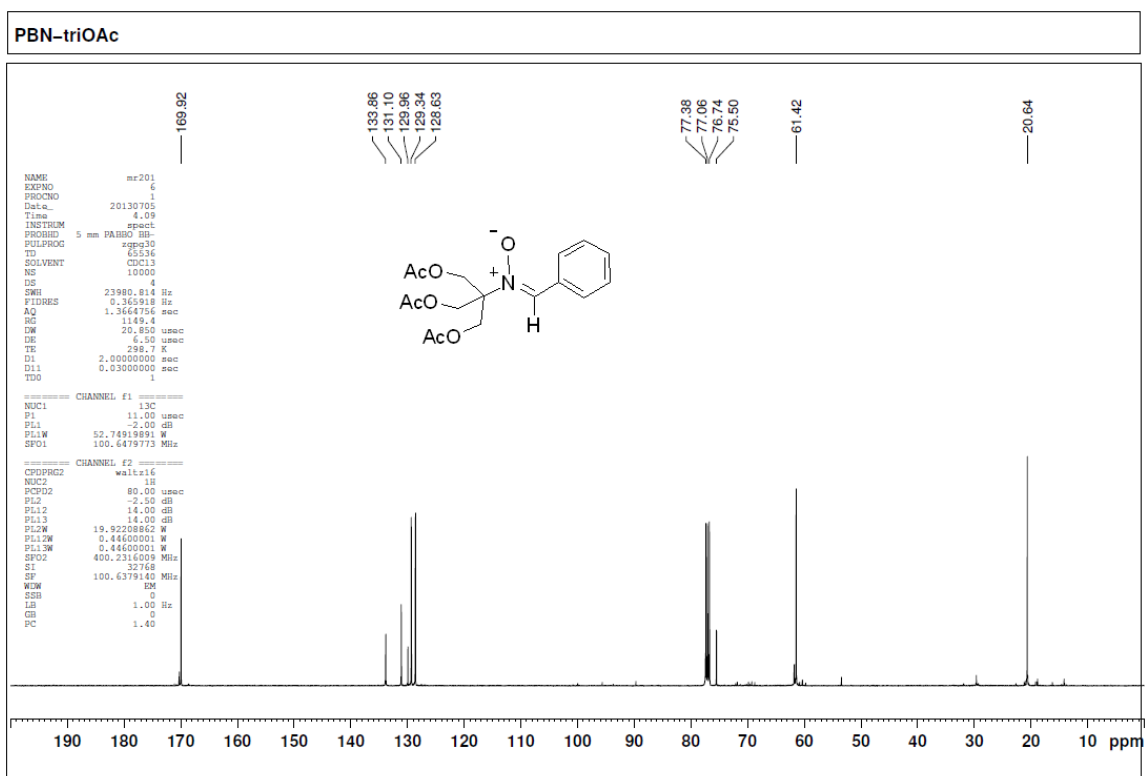

**Figure S31.**  $^{13}\text{C}$  NMR spectrum of compound **11** in  $\text{CDCl}_3$ .

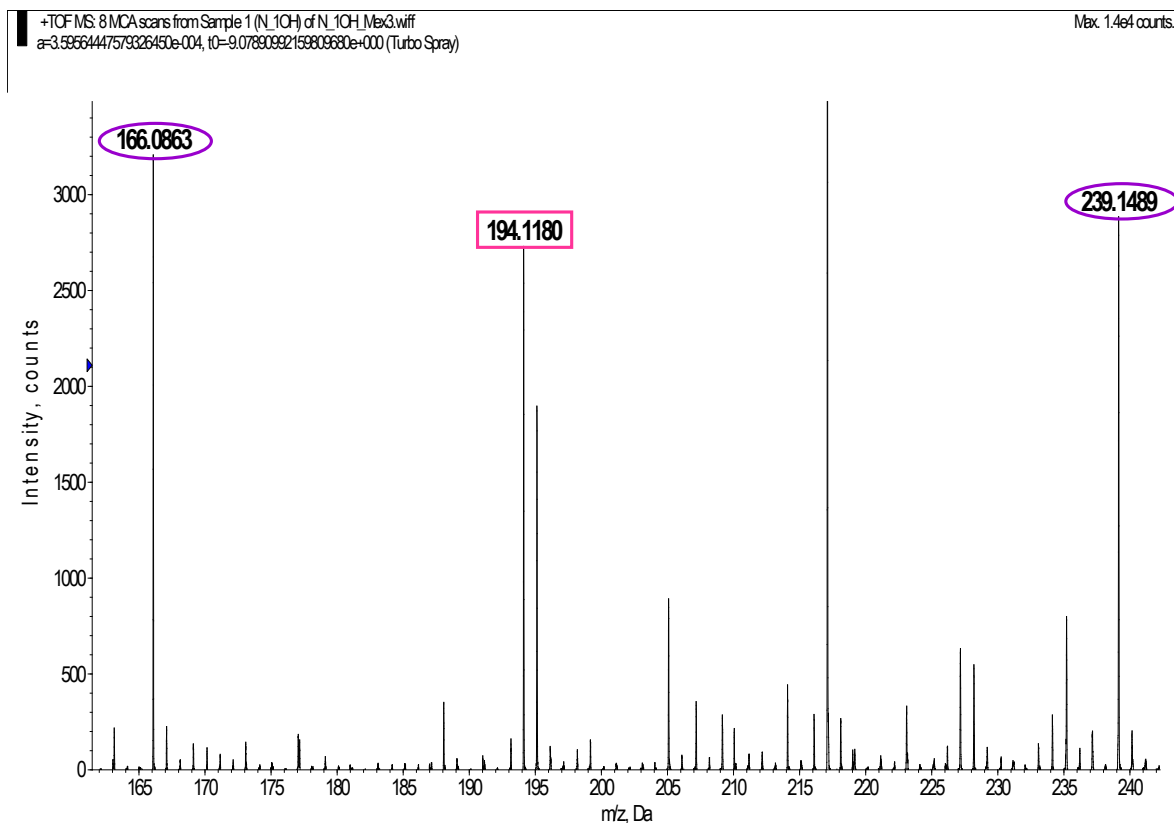

**Figure S32.** High-resolution mass spectrum of compound 1.

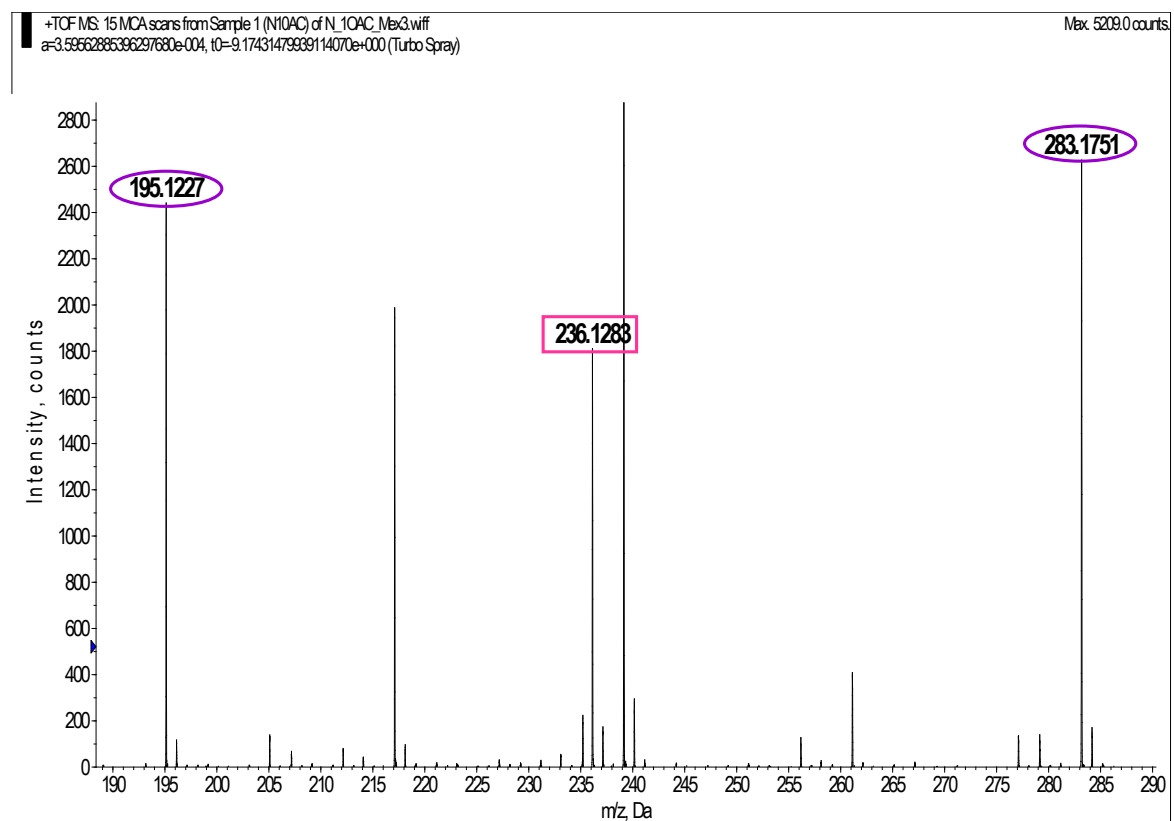

**Figure S33.** High-resolution mass spectrum of compound 2.

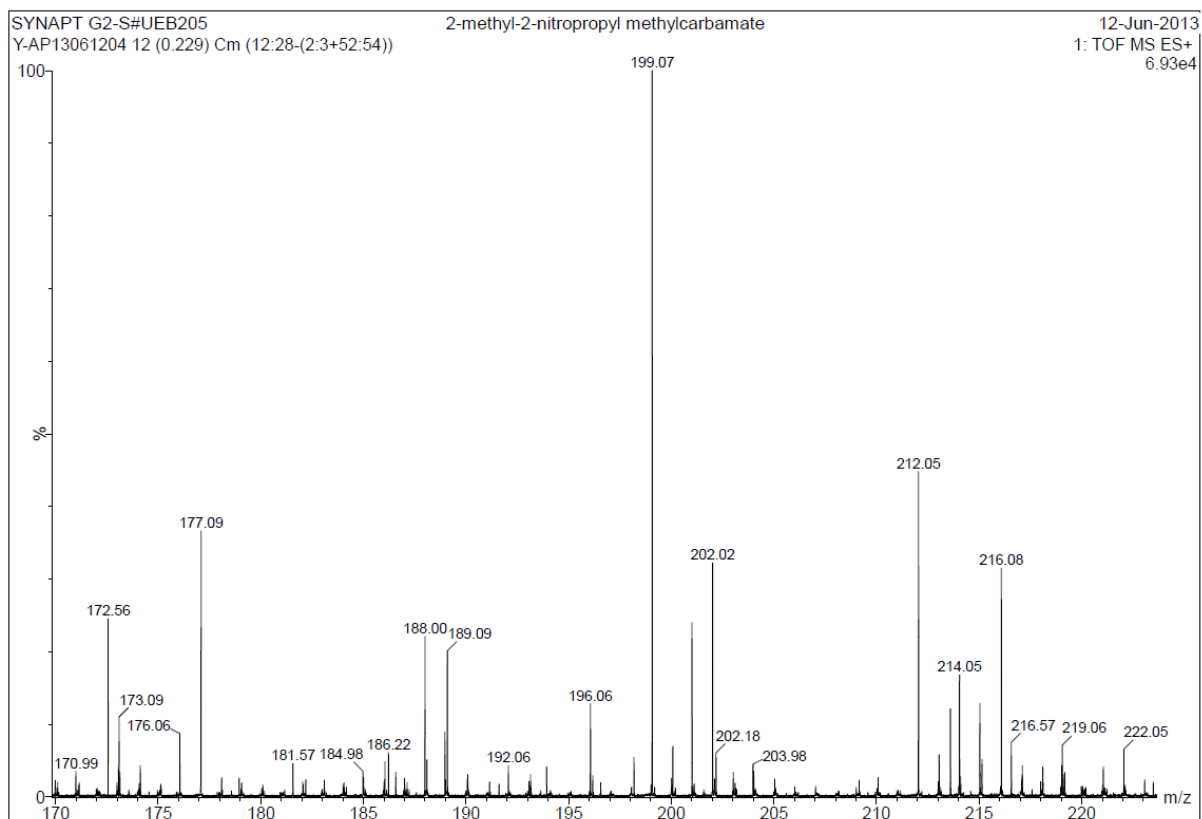

**Figure S34.** High-resolution mass spectrum of compound **3**.

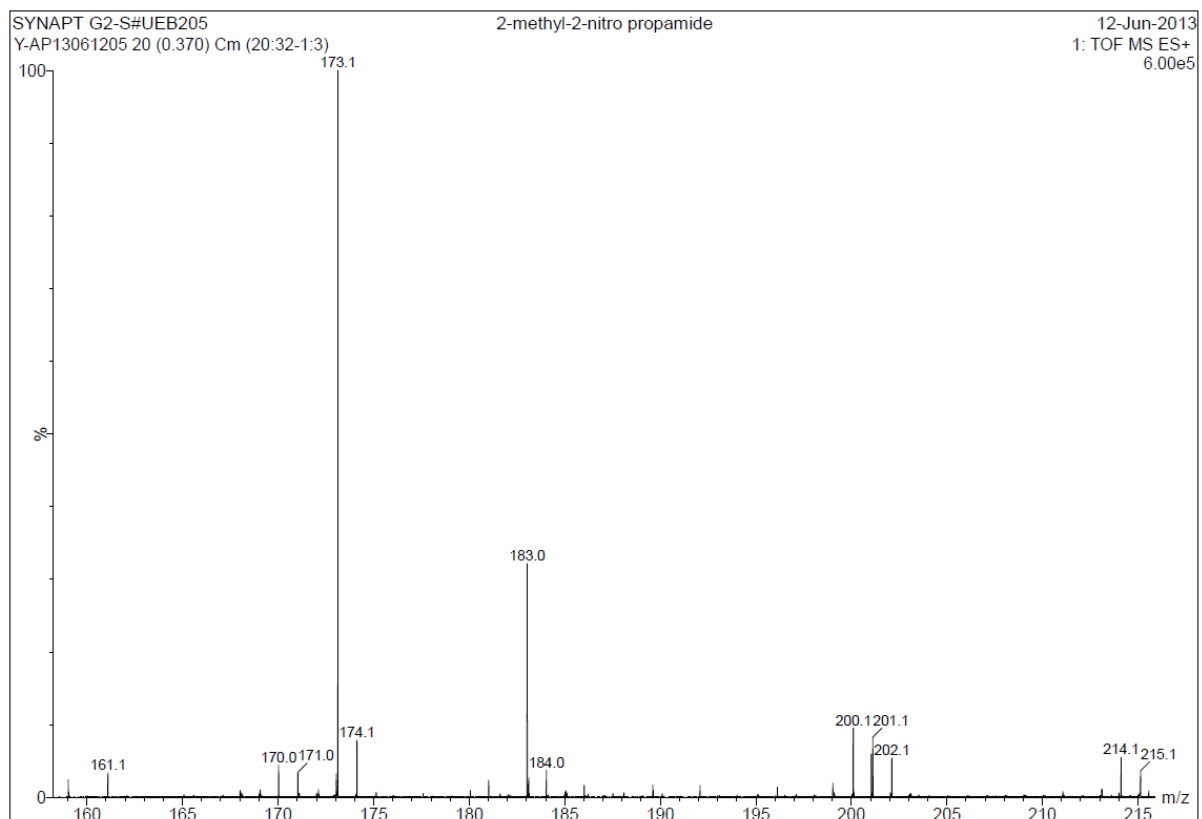

**Figure S35.** High-resolution mass spectrum of compound **5**.

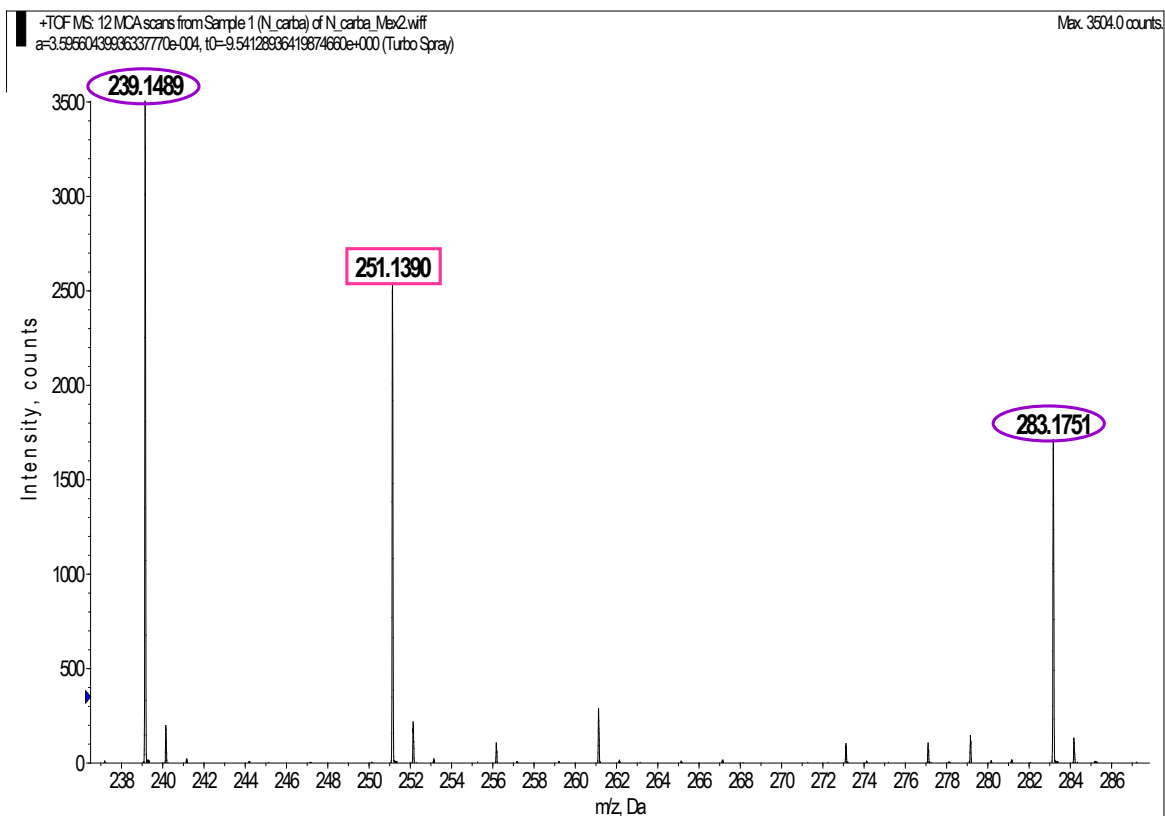

Figure S36. High-resolution mass spectrum of compound 6.

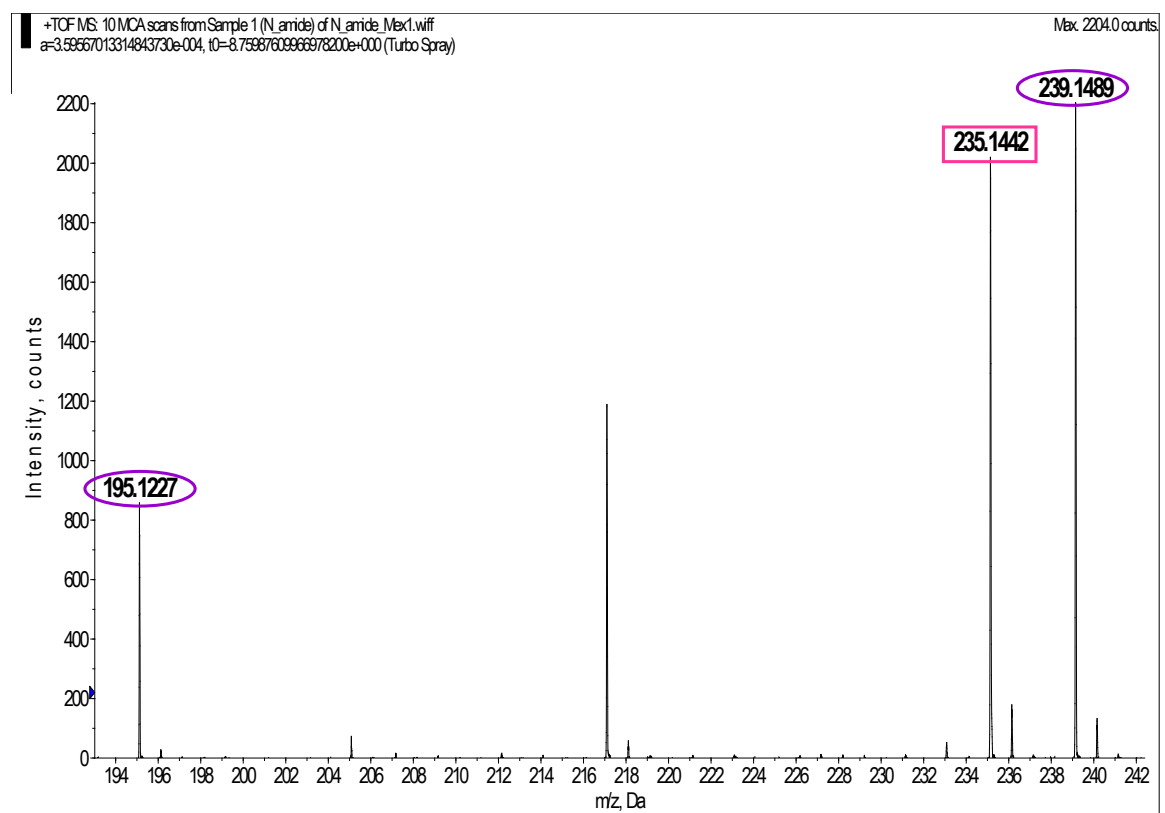

Figure S37. High-resolution mass spectrum of compound 7.

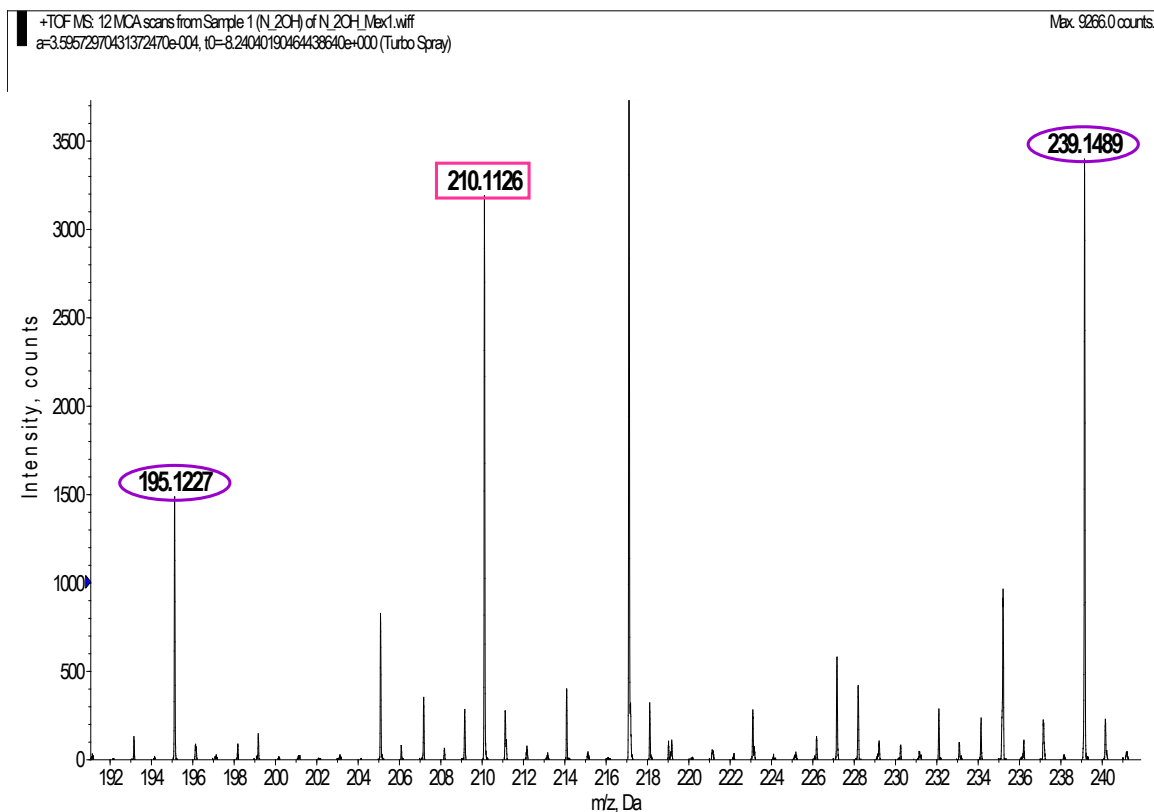

**Figure S38.** High-resolution mass spectrum of compound **8**.

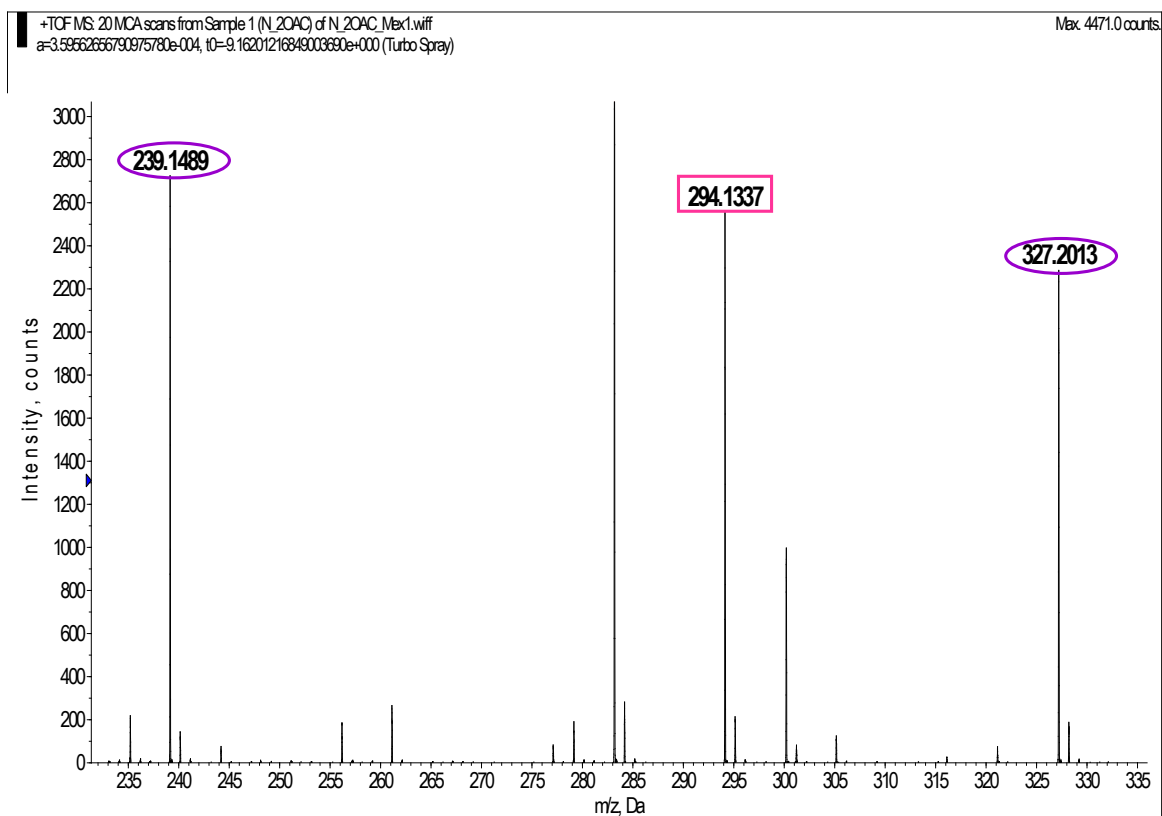

**Figure S39.** High-resolution mass spectrum of compound **10**.

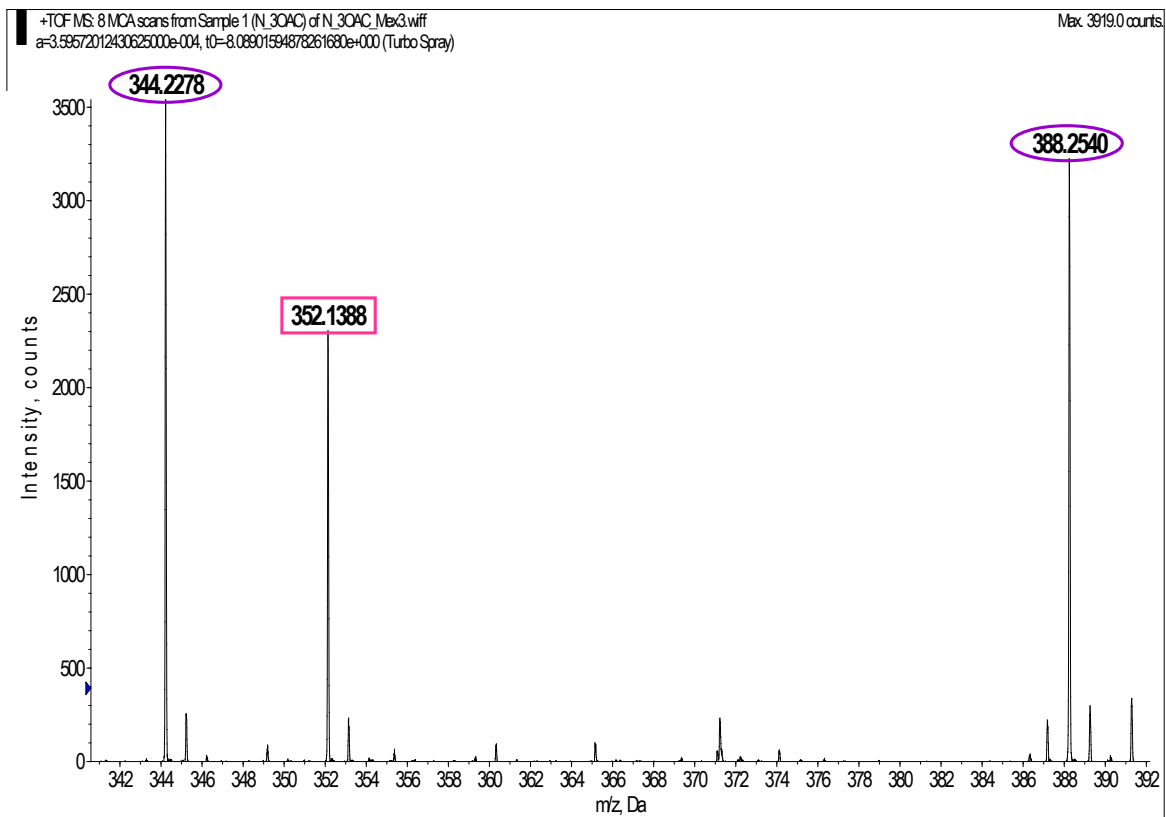

**Figure S40.** High-resolution mass spectrum of compound **11**.



**Table S3.** Thermodynamic parameters of the nitrones in water at the PCM/B3LYP/6-31+g\*\*//B3LYP/6-31g\* level of theory.

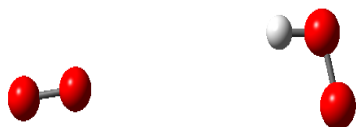

| Compound              | O2 Radical Anion | OOH Radical    |
|-----------------------|------------------|----------------|
| file                  | o2.log           | peroxyIrad.log |
| E 6-31+g**/PCM        | -150.465075      | -150.926851    |
| E 6-31g*              | -150.2996938     | -150.899156    |
| ZPE (raw)             | 0.002761         | 0.014031       |
| Therm Corr to H (raw) | 0.006082         | 0.017832       |
| Therm Corr to G (raw) | -0.017041        | -0.008160      |
| H (raw)               | -150.293612      |                |
| G (raw)               | -150.316735      |                |
| ZPE (scaled)          | 0.002707         | 0.013759       |
| Electronic State      |                  | 2-A"           |
| s2 6-31g*             | 0.7528           | 0.754000       |
| Symmetry              | C01              | CS             |
| N Imag                | 0                | 0.000000       |
| Rotational Con. (GHz) | 1.63425          | 608.847080     |
| Rotational Con. (GHz) | 0.75785          | 33.559922      |
| Rotational Con. (GHz) | 0.66048          | 31.806722      |
| H298                  |                  |                |
| 6-31+g* */PCM         | -150.459047      | -150.909291    |
| 6-31g*                | -150.293665      | -150.881597    |
| G298                  |                  |                |
| 6-31+g* */PCM         | -150.482170      | -150.935283    |
| 6-31g*                | -150.316788      | -150.907589    |

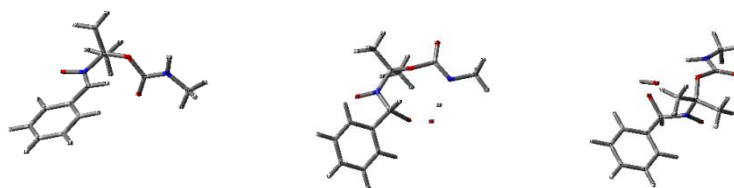

| Compound              | PBN-mono-OC(O)NHMe      | PBN-mono-OC(O)NHMe-O2      | PBN-mono-OC(O)NHMe-HO2      |
|-----------------------|-------------------------|----------------------------|-----------------------------|
| file                  | PBN-alpha-carbamate.log | PBN-alpha-carbamate-O2.log | PBN-alpha-carbamate-O2H.log |
| E 6-31+g**            | -802.102993             | -952.560333                | -953.045952                 |
| E 6-31g*              | -802.0482311            | -952.4226875               | -952.9738242                |
| ZPE (raw)             | 0.272005                | 0.275592                   | 0.290109                    |
| Therm Corr to H (raw) | 0.290165                | 0.295451                   | 0.311141                    |
| Therm Corr to G (raw) | 0.225326                | 0.227129                   | 0.239117                    |
| H (raw)               |                         |                            |                             |
| G (raw)               |                         |                            |                             |
| ZPE (scaled)          | 0.266728                | 0.270246                   | 0.284481                    |
| Electronic State      | 1-A                     | 2-A                        | 2-A                         |
| s2 6-31g*             | 0                       | 0.7546                     | 0.7545                      |
| Symmetry              | C1                      | C1                         | C1                          |
| N Imag                | 0.000000                | 0                          | 0.000000                    |
| Rotational Con. (GHz) | 0.718374                | 0.7408215                  | 0.8196567                   |
| Rotational Con. (GHz) | 0.2798918               | 0.2349741                  | 0.2282568                   |
| Rotational Con. (GHz) | 0.2232464               | 0.1955388                  | 0.2035903                   |
| H298                  |                         |                            |                             |
| 6-31+g* *             | -801.818105             | -952.270228                | -952.740439                 |
| 6-31g*                | -801.763343             | -952.132583                | -952.668311                 |
| G298                  |                         |                            |                             |
| 6-31+g* *             | -801.882944             | -952.338550                | -952.812463                 |
| 6-31g*                | -801.828182             | -952.200905                | -952.740335                 |

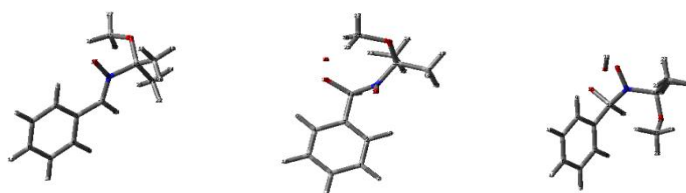

| Compound              | PBN-mono-OMe        | PBN-mono-OMe-O2        | PBN-mono-OMe-HO2        |
|-----------------------|---------------------|------------------------|-------------------------|
| file                  | PBN-alpha-ether.log | PBN-alpha-ether-O2.log | PBN-alpha-ether-O2H.log |
| E 6-31+g**            | -633.368212         | -783.824231            | -784.322527             |
| E 6-31g*              | -633.327056         | -783.676431            | -784.2680369            |
| ZPE (raw)             | 0.245009            | 0.2498                 | 0.263544                |
| Therm Corr to H (raw) | 0.259704            | 0.26646                | 0.280926                |
| Therm Corr to G (raw) | 0.204374            | 0.206491               | 0.218806                |
| H (raw)               |                     |                        |                         |
| G (raw)               |                     |                        |                         |
| ZPE (scaled)          | 0.240256            | 0.244954               | 0.258431                |
| Electronic State      | 1-A                 | 2-A                    | 2-A                     |
| s2 6-31g*             | 0                   | 0.7545                 | 0.7544                  |
| Symmetry              | C1                  | C1                     | C1                      |
| N Imag                | 0.000000            | 0                      | 0                       |
| Rotational Con. (GHz) | 1.595910            | 1.0016998              | 0.7930845               |
| Rotational Con. (GHz) | 0.3488671           | 0.3495338              | 0.4100507               |
| Rotational Con. (GHz) | 0.3310871           | 0.2994256              | 0.3382328               |
| H298                  |                     |                        |                         |
| 6-31+g* *             | -633.113261         | -783.562617            | -784.046714             |
| 6-31g*                | -633.072105         | -783.414817            | -783.992224             |
| G298                  |                     |                        |                         |
| 6-31+g* *             | -633.168591         | -783.622586            | -784.108834             |
| 6-31g*                | -633.127435         | -783.474786            | -784.054344             |

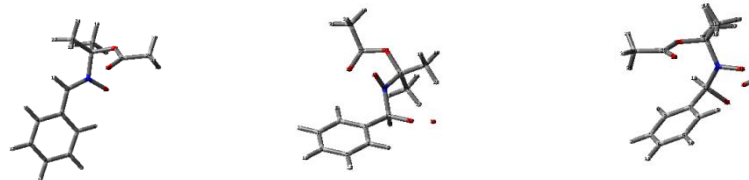

| Compound              | PBN-mono-OC(O)Me    | PBN-mono-OC(O)Me-O2    | PBN-mono-OC(O)Me-HO2    |
|-----------------------|---------------------|------------------------|-------------------------|
| file                  | PBN-alpha-ester.log | PBN-alpha-ester-O2.log | PBN-alpha-ester-O2H.log |
| E 6-31+g**            | -746.730934         | -897.189714            | -897.681499             |
| E 6-31g*              | -746.6864285        | -897.0399514           | -897.6228738            |
| ZPE (raw)             | 0.254483            | 0.259336               | 0.272601                |
| Therm Corr to H (raw) | 0.271066            | 0.278012               | 0.29208                 |
| Therm Corr to G (raw) | 0.210906            | 0.212774               | 0.224369                |
| H (raw)               |                     |                        |                         |
| G (raw)               |                     |                        |                         |
| ZPE (scaled)          | 0.249546            | 0.254305               | 0.267313                |
| Electronic State      | 1-A                 | 2-A                    | 2-A                     |
| s2 6-31g*             | 0                   | 0.7544                 | 0.7544                  |
| Symmetry              | C1                  | C1                     | C1                      |
| N Imag                | 0.000000            | 0                      | 0                       |
| Rotational Con. (GHz) | 1.0658731           | 0.6349036              | 0.551645                |
| Rotational Con. (GHz) | 0.2838513           | 0.3147217              | 0.394877                |
| Rotational Con. (GHz) | 0.2678065           | 0.2359381              | 0.2914232               |
| H298                  |                     |                        |                         |
| 6-31+g* *             | -746.464805         | -896.916733            | -897.394707             |
| 6-31g*                | -746.420299         | -896.766970            | -897.336082             |
| G298                  |                     |                        |                         |
| 6-31+g* *             | -746.524965         | -896.981971            | -897.462418             |
| 6-31g*                | -746.480459         | -896.832208            | -897.403793             |

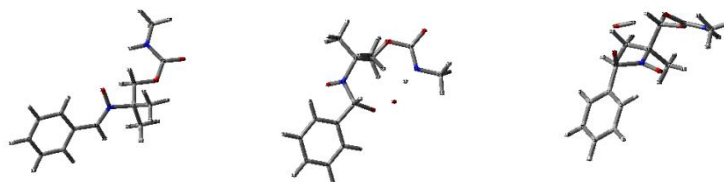

| Compound              | PBN-mono-CH2-OCONHMe<br>PBN-alpha-methylcarbamate.log | PBN-mono-CH2-OCONHMe-O2<br>PBN-alpha-methylcarbamate-O2.log | PBN-mono-CH2-OCONHMe-HO2<br>PBN-alpha-methylcarbamate-O2H.log |
|-----------------------|-------------------------------------------------------|-------------------------------------------------------------|---------------------------------------------------------------|
| file                  |                                                       |                                                             |                                                               |
| E 6-31+g**            | -841.41223                                            | -991.87745                                                  | -992.368953                                                   |
| E 6-31g*              | -841.3495103                                          | -991.7303516                                                | -992.3022749                                                  |
| ZPE (raw)             | 0.301233                                              | 0.306522                                                    | 0.321083                                                      |
| Therm Corr to H (raw) | 0.32068                                               | 0.327154                                                    | 0.342516                                                      |
| Therm Corr to G (raw) | 0.252347                                              | 0.257583                                                    | 0.270201                                                      |
| H (raw)               |                                                       |                                                             |                                                               |
| G (raw)               |                                                       |                                                             |                                                               |
| ZPE (scaled)          | 0.295389                                              | 0.300575                                                    | 0.314854                                                      |
| Electronic State      | 1-A                                                   | 2-A                                                         | 2-A                                                           |
| s2 6-31g*             | 0                                                     | 0.7546                                                      | 0.7544                                                        |
| Symmetry              | C1                                                    | C1                                                          | C1                                                            |
| N Imag                | 0.000000                                              | 0                                                           | 0                                                             |
| Rotational Con. (GHz) | 1.0230754                                             | 0.7200958                                                   | 0.5550306                                                     |
| Rotational Con. (GHz) | 0.1559983                                             | 0.1889317                                                   | 0.2175204                                                     |
| Rotational Con. (GHz) | 0.146479                                              | 0.1606431                                                   | 0.1942813                                                     |
| H298                  |                                                       |                                                             |                                                               |
| 6-31+g* *             | -841.097394                                           | -991.556243                                                 | -992.032666                                                   |
| 6-31g*                | -841.034674                                           | -991.409144                                                 | -991.965988                                                   |
| G298                  |                                                       |                                                             |                                                               |
| 6-31+g* *             | -841.165727                                           | -991.625814                                                 | -992.104981                                                   |
| 6-31g*                | -841.103007                                           | -991.478715                                                 | -992.038303                                                   |

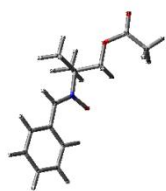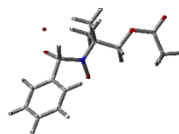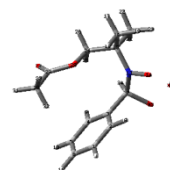

| Compound              | PBN-mono-CH2OCOME         | PBN-mono-CH2OCOME-O2         | PBN-mono-CH2OCOME-HO2         |
|-----------------------|---------------------------|------------------------------|-------------------------------|
| file                  | PBN-alpha-methylester.log | PBN-alpha-methylester-O2.log | PBN-alpha-methylester-O2H.log |
| E 6-31+g**            | -786.042782               | -936.499465                  | -936.99893                    |
| E 6-31g*              | -785.9899653              | -936.3417761                 | -936.9346061                  |
| ZPE (raw)             | 0.283721                  | 0.288257                     | 0.302086                      |
| Therm Corr to H (raw) | 0.301636                  | 0.308333                     | 0.322799                      |
| Therm Corr to G (raw) | 0.237404                  | 0.238544                     | 0.251596                      |
| H (raw)               |                           |                              |                               |
| G (raw)               |                           |                              |                               |
| ZPE (scaled)          | 0.278217                  | 0.282665                     | 0.296226                      |
| Electronic State      | 1-A                       | 2-A                          | 2-A                           |
| s2 6-31g*             | 0                         | 0.7546                       | 0.7545                        |
| Symmetry              | C1                        | C1                           | C1                            |
| N Imag                | 0                         | 0                            | 0                             |
| Rotational Con. (GHz) | 1.2708003                 | 0.7413299                    | 0.4543138                     |
| Rotational Con. (GHz) | 0.1798693                 | 0.1841537                    | 0.3645709                     |
| Rotational Con. (GHz) | 0.1716097                 | 0.157964                     | 0.2488327                     |
| H298                  |                           |                              |                               |
| 6-31+g* *             | -785.746650               | -936.196724                  | -936.681991                   |
| 6-31g*                | -785.693834               | -936.039035                  | -936.617668                   |
| G298                  |                           |                              |                               |
| 6-31+g* *             | -785.810882               | -936.266513                  | -936.753194                   |
| 6-31g*                | -785.758066               | -936.108824                  | -936.688871                   |

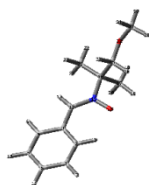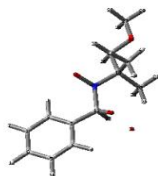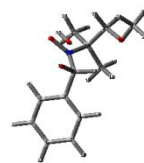

| Compound              | PBN-mono-CH2OMe<br>PBN-alpha-methylether.log | PBN-mono-CH2OMe-O2<br>PBN-alpha-methylether-O2.log | PBN-mono-CH2OMe-HO2<br>PBN-alpha-methylether-O2H.log |
|-----------------------|----------------------------------------------|----------------------------------------------------|------------------------------------------------------|
| file                  |                                              |                                                    |                                                      |
| E 6-31+g**            | -672.68027                                   | -823.131399                                        | -823.629274                                          |
| E 6-31g*              | -672.6390395                                 | -822.9794606                                       | -823.5749547                                         |
| ZPE (raw)             | 0.274087                                     | 0.278292                                           | 0.29262                                              |
| Therm Corr to H (raw) | 0.290152                                     | 0.296744                                           | 0.311307                                             |
| Therm Corr to G (raw) | 0.231289                                     | 0.231805                                           | 0.245649                                             |
| H (raw)               |                                              |                                                    |                                                      |
| G (raw)               |                                              |                                                    |                                                      |
| ZPE (scaled)          | 0.268770                                     | 0.272893                                           | 0.286943                                             |
| Electronic State      | 1-A                                          | 2-A                                                | 2-A                                                  |
| s2 6-31g*             | 0                                            | 0.755                                              | 0.7545                                               |
| Symmetry              | C1                                           | C1                                                 | C1                                                   |
| N Imag                | 0                                            | 0.000000                                           | 0                                                    |
| Rotational Con. (GHz) | 1.5866777                                    | 0.9480255                                          | 0.731303                                             |
| Rotational Con. (GHz) | 0.2525605                                    | 0.2514865                                          | 0.3112233                                            |
| Rotational Con. (GHz) | 0.2417921                                    | 0.2149952                                          | 0.2987838                                            |
| H298                  |                                              |                                                    |                                                      |
| 6-31+g* *             | -672.395435                                  | -822.840054                                        | -823.323644                                          |
| 6-31g*                | -672.354205                                  | -822.688115                                        | -823.269324                                          |
| G298                  |                                              |                                                    |                                                      |
| 6-31+g* *             | -672.454298                                  | -822.904993                                        | -823.389302                                          |
| 6-31g*                | -672.413068                                  | -822.753054                                        | -823.334982                                          |

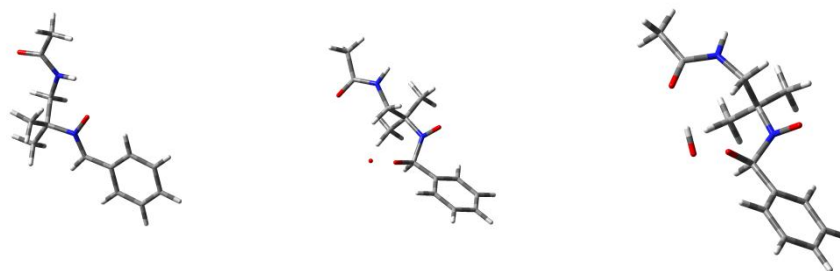

| Compound                     | PBN-mono-CH2NHCOMe  | PBN-mono-CH2NHCOMe-O2 | PBN-mono-CH2NHCOMe-HO2 |
|------------------------------|---------------------|-----------------------|------------------------|
| file                         | PBN-CH2NHCOMe-c.out | PBN-CH2NHCOMe-O2c.out | PBN-CH2NHCOMe-HO2c.out |
| <b>E 6-31+g**/PCM</b>        | -766.194579         | -916.648137           | -917.141629            |
| <b>E 6-31g*</b>              | -766.13971          | -916.4782989          | -917.0713523           |
| <b>ZPE (raw)</b>             | 0.296666            | 0.300354              | 0.315907               |
| <b>Therm Corr to H (raw)</b> | 0.314789            | 0.320942              | 0.336226               |
| <b>Therm Corr to G (raw)</b> | 0.249762            | 0.249879              | 0.267266               |
| <b>H (raw)</b>               |                     |                       |                        |
| <b>G (raw)</b>               |                     |                       |                        |
| <b>ZPE (scaled)</b>          | 0.290911            | 0.294527              | 0.309778               |
| <b>Electronic State</b>      | 1-A                 | 2-A                   | 2-A                    |
| <b>s2 6-31g*</b>             | 0                   | 0.7545                | 0.7544                 |
| <b>Symmetry</b>              | -                   | -                     | -                      |
| <b>N Imag</b>                | 0.000000            | 0.000000              | 0.000000               |
| <b>Rotational Con. (GHz)</b> | 1.0982762           | 1.0022697             | 0.8434486              |
| <b>Rotational Con. (GHz)</b> | 0.2054283           | 0.178761              | 0.2053757              |
| <b>Rotational Con. (GHz)</b> |                     | 0.165433              | 0.1782478              |
| <b>H298</b>                  |                     |                       |                        |
| <b>6-31+g* */PCM</b>         | -765.885545         | -916.333022           | -916.811532            |
| <b>6-31g*</b>                | -765.830676         | -916.163184           | -916.741255            |
| <b>G298</b>                  |                     |                       |                        |
| <b>6-31+g* */PCM</b>         | -765.950572         | -916.404085           | -916.880492            |
| <b>6-31g*</b>                | -765.895703         | -916.234247           | -916.810215            |



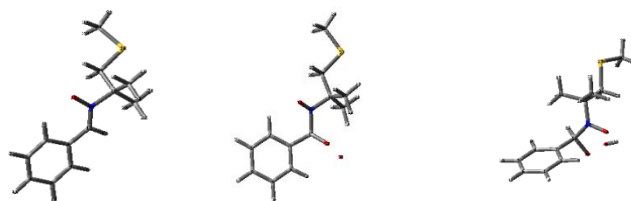

| Compound                     | PBN-mono-CH2SMe<br>PBN-alpha-<br>methylthio.log | PBN-mono-CH2SMe-O2<br>PBN-alpha-methylthio-<br>O2.log | PBN-mono-CH2SMe-HO2<br>PBN-alpha-methylthio-<br>O2H.log |
|------------------------------|-------------------------------------------------|-------------------------------------------------------|---------------------------------------------------------|
| file                         |                                                 |                                                       |                                                         |
| <b>E 6-31+g**/PCM</b>        | -995.660242                                     | -1146.111629                                          | -1146.609507                                            |
| <b>E 6-31g*</b>              | -995.6197795                                    | -1145.963027                                          | -1146.554755                                            |
| <b>ZPE (raw)</b>             | 0.27025                                         | 0.274394                                              | 0.288535                                                |
| <b>Therm Corr to H (raw)</b> | 0.287027                                        | 0.29359                                               | 0.30803                                                 |
| <b>Therm Corr to G (raw)</b> | 0.225071                                        | 0.225735                                              | 0.239048                                                |
| <b>H (raw)</b>               |                                                 |                                                       |                                                         |
| <b>G (raw)</b>               |                                                 |                                                       |                                                         |
| <b>ZPE (scaled)</b>          | 0.265007                                        | 0.269071                                              | 0.282937                                                |
| <b>Electronic State</b>      | 1-A                                             | 2-A                                                   | 2-A                                                     |
| <b>s2 6-31g*</b>             | 0                                               | 0.7549                                                | 0.7545                                                  |
| <b>Symmetry</b>              | C1                                              | C1                                                    | C1                                                      |
| <b>N Imag</b>                | 0                                               | 0                                                     | 0                                                       |
| <b>Rotational Con. (GHz)</b> | 1.3928097                                       | 0.8696506                                             | 0.8142297                                               |
| <b>Rotational Con. (GHz)</b> | 0.2122912                                       | 0.2103509                                             | 0.221015                                                |
| <b>Rotational Con. (GHz)</b> | 0.2047782                                       | 0.1813314                                             | 0.2053018                                               |
| <b>H298</b>                  |                                                 |                                                       |                                                         |
| <b>6-31+g* */PCM</b>         | -995.378458                                     | -1145.823362                                          | -1146.307075                                            |
| <b>6-31g*</b>                | -995.337995                                     | -1145.674760                                          | -1146.252323                                            |
| <b>G298</b>                  |                                                 |                                                       |                                                         |
| <b>6-31+g* */PCM</b>         | -995.440414                                     | -1145.891217                                          | -1146.376057                                            |
| <b>6-31g*</b>                | -995.399951                                     | -1145.742615                                          | -1146.321305                                            |

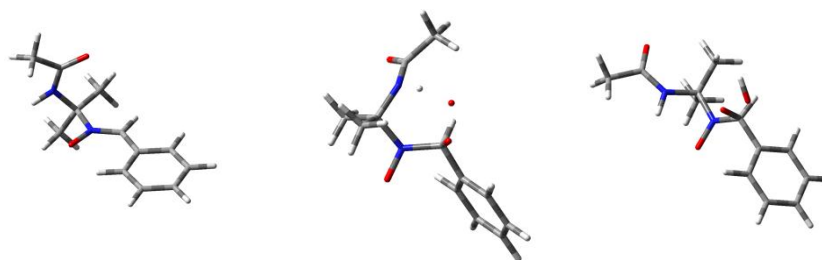

| Compound              | PBN-mono-NHCOMe  | PBN-mono-NHCOMe-O2 | PBN-mono-NHCOMe-HO2 |
|-----------------------|------------------|--------------------|---------------------|
| file                  | PBN-NHCOMe-c.out | PBN-NHCOMe-O2c.out | PBN-NHCOMe-HO2c.out |
| E 6-31+g**/PCM        | -726.87404       | -877.337384        | -877.82096          |
| E 6-31g*              | -726.8220775     | -877.1935865       | -877.7493731        |
| ZPE (raw)             | 0.267486         | 0.271346           | 0.285199            |
| Therm Corr to H (raw) | 0.284318         | 0.290111           | 0.305159            |
| Therm Corr to G (raw) | 0.223054         | 0.22449            | 0.235614            |
| H (raw)               |                  |                    |                     |
| G (raw)               |                  |                    |                     |
| ZPE (scaled)          | 0.262297         | 0.266082           | 0.279666            |
| Electronic State      | 1-A              | 2-A                | 2-A                 |
| s2 6-31g*             | 0                | 0.7546             | 0.7545              |
| Symmetry              | C1               | C1                 | -                   |
| N Imag                | 0.000000         | 0.000000           | 0.000000            |
| Rotational Con. (GHz) | 0.9897488        | 0.7136828          | 0.900159            |
| Rotational Con. (GHz) | 0.2781133        | 0.2632657          | 0.2146572           |
| Rotational Con. (GHz) | 0.2672547        | 0.2545351          | 0.2087082           |
| H298                  |                  |                    |                     |
| 6-31+g* */PCM         | -726.594911      | -877.052537        | -877.521334         |
| 6-31g*                | -726.542949      | -876.908740        | -877.449747         |
| G298                  |                  |                    |                     |
| 6-31+g* */PCM         | -726.656175      | -877.118158        | -877.590879         |
| 6-31g*                | -726.604213      | -876.974361        | -877.519292         |

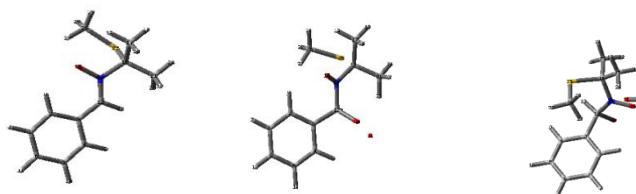

| Compound              | PBN-mono-SMe       | PBN-mono-SMe-O2       | PBN-mono-SMe-HO2       |
|-----------------------|--------------------|-----------------------|------------------------|
| file                  | PBN-alpha-thio.log | PBN-alpha-thio-O2.log | PBN-alpha-thio-O2H.log |
| E 6-31+g**/PCM        | -956.342378        | -1106.797004          | -1107.295159           |
| E 6-31g*              | -956.305779        | -1106.649009          | -1107.243038           |
| ZPE (raw)             | 0.241532           | 0.245455              | 0.259766               |
| Therm Corr to H (raw) | 0.256905           | 0.263393              | 0.277894               |
| Therm Corr to G (raw) | 0.199587           | 0.199553              | 0.213902               |
| H (raw)               |                    |                       |                        |
| G (raw)               |                    |                       |                        |
| ZPE (scaled)          | 0.236846           | 0.240693              | 0.254727               |
| Electronic State      | 1-A                | 2-A                   | 2-A                    |
| s2 6-31g*             | 0                  | 0.7551                | 0.7545                 |
| Symmetry              | C1                 | C1                    | C1                     |
| N Imag                | 0                  | 0                     | 0                      |
| Rotational Con. (GHz) | 1.3419568          | 0.7659551             | 0.6638948              |
| Rotational Con. (GHz) | 0.3051301          | 0.3275993             | 0.3914837              |
| Rotational Con. (GHz) | 0.2853524          | 0.2781162             | 0.3089264              |
| H298                  |                    |                       |                        |
| 6-31+g* */PCM         | -956.090159        | -1106.538373          | -1107.022304           |
| 6-31g*                | -956.053560        | -1106.390378          | -1106.970183           |
| G298                  |                    |                       |                        |
| 6-31+g* */PCM         | -956.147477        | -1106.602213          | -1107.086296           |
| 6-31g*                | -956.110878        | -1106.454218          | -1107.034175           |

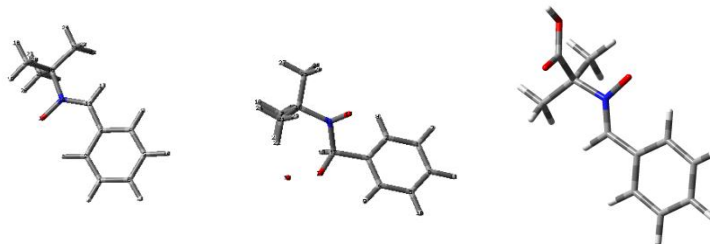

| Compound file         | PBN<br>PBN.log | PBN-O2<br>PBN-O2.log | PBN-HO2<br>PBN-O2H.log |
|-----------------------|----------------|----------------------|------------------------|
| E 6-31+g**/PCM        | -558.162931    | -708.617074          | -709.112085            |
| E 6-31g*              | -558.1259776   | -708.4689312         | -709.0604787           |
| ZPE (raw)             | 0.240829       | 0.245281             | 0.258994               |
| Therm Corr to H (raw) | 0.254306       | 0.260894             | 0.275292               |
| Therm Corr to G (raw) | 0.202102       | 0.203309             | 0.214831               |
| H (raw)               |                |                      |                        |
| G (raw)               |                |                      |                        |
| ZPE (scaled)          | 0.236157       | 0.240523             | 0.253970               |
| Electronic State      | 1-A            | 2-A                  | 2-A                    |
| s2 6-31g*             | 0              | 0.7545               | 0.7545                 |
| Symmetry              | C1             | C1                   | C1                     |
| N Imag                | 0.000000       | 0                    | 0                      |
| Rotational Con. (GHz) | 2.0324432      | 1.1569044            | 0.9379767              |
| Rotational Con. (GHz) | 0.400396       | 0.3896029            | 0.4185919              |
| Rotational Con. (GHz) | 0.3613914      | 0.3302765            | 0.3677533              |
| H298                  |                |                      |                        |
| 6-31+g* */PCM         | -557.913297    | -708.360938          | -708.841817            |
| 6-31g*                | -557.876344    | -708.212796          | -708.790211            |
| G298                  |                |                      |                        |
| 6-31+g* */PCM         | -557.965501    | -708.418523          | -708.902278            |
| 6-31g*                | -557.928548    | -708.270381          | -708.850672            |

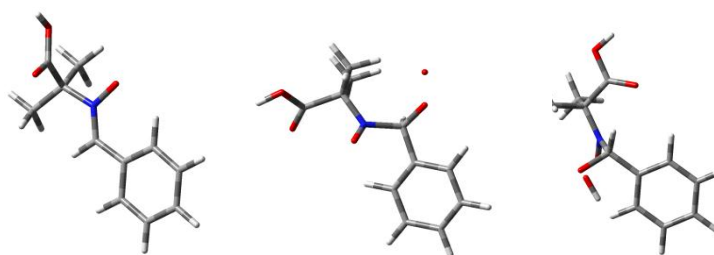

| Compound              | PBN-COOH               | PBN-COOH-O2               | PBN-COOH-HO2               |
|-----------------------|------------------------|---------------------------|----------------------------|
| file                  | PBN-alpha-COOH.com.log | PBN-alpha-COOH-O2.com.log | PBN-alpha-COOH-OOH.com.log |
| E 6-31+g**/PCM        | -707.431235            | -857.888027               | -858.376424                |
| E 6-31g*              | -707.369149            | -857.7204353              | -858.3025633               |
| ZPE (raw)             | 0.227237               | 0.231972                  | 0.24507                    |
| Therm Corr to H (raw) | 0.242184               | 0.249033                  | 0.263149                   |
| Therm Corr to G (raw) | 0.185579               | 0.187132                  | 0.19847                    |
| H (raw)               |                        |                           |                            |
| G (raw)               |                        |                           |                            |
| ZPE (scaled)          | 0.222829               | 0.227472                  | 0.240316                   |
| Electronic State      | 1-A                    | 2-A                       | 2-A                        |
| s2 6-31g*             | 0                      | 0.7545                    | 0.7545                     |
| Symmetry              | -                      | -                         | -                          |
| N Imag                | 0.000000               | 0.000000                  | 0.000000                   |
| Rotational Con. (GHz) | 1.4793173              | 0.838635                  | 0.8026308                  |
| Rotational Con. (GHz) | 0.2991951              | 0.3123442                 | 0.3117894                  |
| Rotational Con. (GHz) | 0.2842145              | 0.2548107                 | 0.2852084                  |
| H298                  |                        |                           |                            |
| 6-31+g* */PCM         | -707.193459            | -857.643494               | -858.118029                |
| 6-31g*                | -707.131373            | -857.475903               | -858.044169                |
| G298                  |                        |                           |                            |
| 6-31+g* */PCM         | -707.250064            | -857.705395               | -858.182708                |
| 6-31g*                | -707.187978            | -857.537804               | -858.108848                |

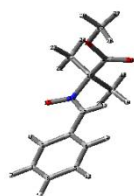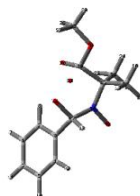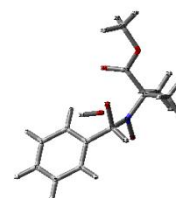

| Compound                     | PBN-mono-COOMe         | PBN-mono-COOMe-O2         | PBN-mono-COOMe-HO2         |
|------------------------------|------------------------|---------------------------|----------------------------|
| file                         | PBN-alpha-carboxyl.log | PBN-alpha-carboxyl-O2.log | PBN-alpha-carboxyl-O2H.log |
| <b>E 6-31+g**/PCM</b>        | -746.720138            | -897.179983               | -897.665892                |
| <b>E 6-31g*</b>              | -746.6775402           | -897.042654               | -897.6056095               |
| <b>ZPE (raw)</b>             | 0.255084               | 0.260047                  | 0.273071                   |
| <b>Therm Corr to H (raw)</b> | 0.271960               | 0.278288                  | 0.292876                   |
| <b>Therm Corr to G (raw)</b> | 0.210399               | 0.214107                  | 0.22423                    |
| <b>H (raw)</b>               |                        |                           |                            |
| <b>G (raw)</b>               |                        |                           |                            |
| <b>ZPE (scaled)</b>          | 0.250135               | 0.255002                  | 0.267773                   |
| <b>Electronic State</b>      | 1-A                    | 2-A                       | 2-A                        |
| <b>s2 6-31g*</b>             | 0                      | 0.7544                    | 0.7544                     |
| <b>Symmetry</b>              | C1                     | C1                        | C1                         |
| <b>N Imag</b>                | 0.000000               | 0                         | 0                          |
| <b>Rotational Con. (GHz)</b> | 0.9437443              | 0.8977346                 | 0.7427467                  |
| <b>Rotational Con. (GHz)</b> | 0.2997874              | 0.2758941                 | 0.2726384                  |
| <b>Rotational Con. (GHz)</b> | 0.2671731              | 0.2531769                 | 0.2606018                  |
| <b>H298</b>                  |                        |                           |                            |
| <b>6-31+g* */PCM</b>         | -746.453127            | -896.906740               | -897.378314                |
| <b>6-31g*</b>                | -746.410529            | -896.769411               | -897.318031                |
| <b>G298</b>                  |                        |                           |                            |
| <b>6-31+g* */PCM</b>         | -746.514688            | -896.970921               | -897.446960                |
| <b>6-31g*</b>                | -746.472090            | -896.833592               | -897.386677                |

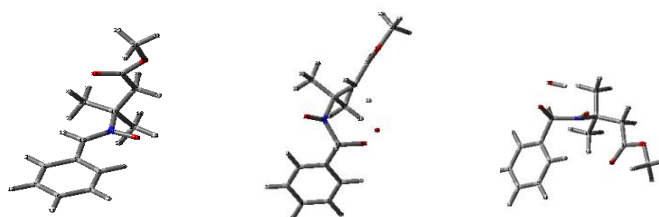

| Compound                     | PBN-mono-CH <sub>2</sub> COOMe<br>PBN-alpha-methylcarboxy.log | PBN-mono-CH <sub>2</sub> COOMe-O <sub>2</sub><br>PBN-alpha-methylcarboxy-O <sub>2</sub> .log | PBN-mono-CH <sub>2</sub> COOMe-HO <sub>2</sub><br>PBN-alpha-methylcarboxyl-O <sub>2</sub> H.log |
|------------------------------|---------------------------------------------------------------|----------------------------------------------------------------------------------------------|-------------------------------------------------------------------------------------------------|
| file                         |                                                               |                                                                                              |                                                                                                 |
| <b>E 6-31+g**/PCM</b>        | -786.043989                                                   | -936.498645                                                                                  | -936.991973                                                                                     |
| <b>E 6-31g*</b>              | -785.9963804                                                  | -936.3496549                                                                                 | -936.9305986                                                                                    |
| <b>ZPE (raw)</b>             | 0.28425                                                       | 0.287747                                                                                     | 0.302515                                                                                        |
| <b>Therm Corr to H (raw)</b> | 0.302144                                                      | 0.307848                                                                                     | 0.323092                                                                                        |
| <b>Therm Corr to G (raw)</b> | 0.237785                                                      | 0.238745                                                                                     | 0.252281                                                                                        |
| <b>H (raw)</b>               |                                                               |                                                                                              |                                                                                                 |
| <b>G (raw)</b>               |                                                               |                                                                                              |                                                                                                 |
| <b>ZPE (scaled)</b>          | 0.278736                                                      | 0.282165                                                                                     | 0.296646                                                                                        |
| <b>Electronic State</b>      | 1-A                                                           | 2-A                                                                                          | 2-A                                                                                             |
| <b>s2 6-31g*</b>             | 0                                                             | 0.7548                                                                                       | 0.7545                                                                                          |
| <b>Symmetry</b>              | C1                                                            | C1                                                                                           | C1                                                                                              |
| <b>N Imag</b>                | 0.000000                                                      | 0.000000                                                                                     | 0                                                                                               |
| <b>Rotational Con. (GHz)</b> | 0.7223123                                                     | 0.8821302                                                                                    | 0.4875765                                                                                       |
| <b>Rotational Con. (GHz)</b> | 0.266412                                                      | 0.1894024                                                                                    | 0.2878876                                                                                       |
| <b>Rotational Con. (GHz)</b> | 0.2331577                                                     | 0.1807801                                                                                    | 0.2286974                                                                                       |
| <b>H298</b>                  |                                                               |                                                                                              |                                                                                                 |
| <b>6-31+g* */PCM</b>         | -785.747359                                                   | -936.196379                                                                                  | -936.674750                                                                                     |
| <b>6-31g*</b>                | -785.699751                                                   | -936.047389                                                                                  | -936.613375                                                                                     |
| <b>G298</b>                  |                                                               |                                                                                              |                                                                                                 |
| <b>6-31+g* */PCM</b>         | -785.811718                                                   | -936.265482                                                                                  | -936.745561                                                                                     |
| <b>6-31g*</b>                | -785.764110                                                   | -936.116492                                                                                  | -936.684186                                                                                     |

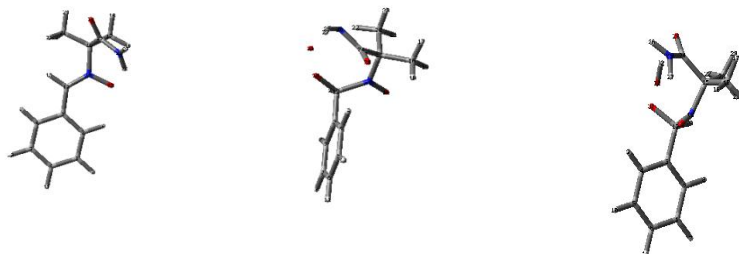

| Compound              | PBN-mono-CONH2      | PBN-mono-CONH2-O2      | PBN-mono-CONH2-HO2      |
|-----------------------|---------------------|------------------------|-------------------------|
| file                  | PBN-alpha-CONH2.log | PBN-alpha-CONH2-O2.log | PBN-alpha-CONH2-HO2.log |
| E 6-31+g**/PCM        | -687.567169         | -838.027242            | -838.511094             |
| E 6-31g*              | -687.5113347        | -837.8777783           | -838.4453241            |
| ZPE (raw)             | 0.239944            | 0.244211               | 0.258958                |
| Therm Corr to H (raw) | 0.255025            | 0.26105                | 0.276381                |
| Therm Corr to G (raw) | 0.198075            | 0.200345               | 0.214241                |
| H (raw)               |                     |                        |                         |
| G (raw)               |                     |                        |                         |
| ZPE (scaled)          | 0.235289            | 0.239473               | 0.253934                |
| Electronic State      | 1-A                 | 2-A                    | 2-A                     |
| s2 6-31g*             | 0                   | 0.7546                 | 0.7545                  |
| Symmetry              | C1                  | C1                     | C1                      |
| N Imag                | 0.000000            | 0.000000               | 0.000000                |
| Rotational Con. (GHz) | 1.408565            | 0.8202188              | 0.9247357               |
| Rotational Con. (GHz) | 0.3025985           | 0.3289981              | 0.2962875               |
| Rotational Con. (GHz) | 0.2851659           | 0.3245404              | 0.2842783               |
| H298                  |                     |                        |                         |
| 6-31+g* */PCM         | -687.316799         | -837.770930            | -838.239737             |
| 6-31g*                | -687.260965         | -837.621466            | -838.173967             |
| G298                  |                     |                        |                         |
| 6-31+g* */PCM         | -687.373749         | -837.831635            | -838.301877             |
| 6-31g*                | -687.317915         | -837.682171            | -838.236107             |



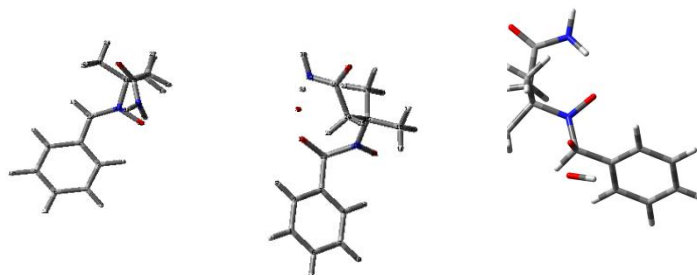

| Compound              | PBN-mono-<br>CH2CONH2<br>PBN-alpha-<br>CH2CONH2.log | PBN-mono-CH2CONH2-<br>O2<br>PBN-alpha-CH2CONH2-<br>O2.log | PBN-mono-CH2CONH2-<br>HO2<br>PBN-alpha-CH2CONH2-<br>HO2.log |
|-----------------------|-----------------------------------------------------|-----------------------------------------------------------|-------------------------------------------------------------|
| file                  |                                                     |                                                           |                                                             |
| E 6-31+g**/PCM        | -726.887839                                         | -877.343451                                               | -877.830381                                                 |
| E 6-31g*              | -726.827997                                         | -877.1922673                                              | -877.7522906                                                |
| ZPE (raw)             | 0.269338                                            | 0.27368                                                   | 0.286963                                                    |
| Therm Corr to H (raw) | 0.285437                                            | 0.291722                                                  | 0.306217                                                    |
| Therm Corr to G (raw) | 0.22677                                             | 0.227597                                                  | 0.239157                                                    |
| H (raw)               |                                                     |                                                           |                                                             |
| G (raw)               |                                                     |                                                           |                                                             |
| ZPE (scaled)          | 0.264113                                            | 0.268371                                                  | 0.281396                                                    |
| Electronic State      | 1-A                                                 | 2-A                                                       | 2-A                                                         |
| s2 6-31g*             | 0                                                   | 0.7546                                                    | 0.7545                                                      |
| Symmetry              | C1                                                  | C1                                                        | C1                                                          |
| N Imag                | 0.000000                                            | 0.000000                                                  | 0.000000                                                    |
| Rotational Con. (GHz) | 0.9587036                                           | 0.7179466                                                 | 0.7427507                                                   |
| Rotational Con. (GHz) | 0.2975838                                           | 0.2719601                                                 | 0.2427123                                                   |
| Rotational Con. (GHz) | 0.2828375                                           | 0.2450104                                                 | 0.212362                                                    |
| H298                  |                                                     |                                                           |                                                             |
| 6-31+g* */PCM         | -726.607627                                         | -877.057038                                               | -877.529731                                                 |
| 6-31g*                | -726.547785                                         | -876.905855                                               | -877.451641                                                 |
| G298                  |                                                     |                                                           |                                                             |
| 6-31+g* */PCM         | -726.666294                                         | -877.121163                                               | -877.596791                                                 |
| 6-31g*                | -726.606452                                         | -876.969980                                               | -877.518701                                                 |

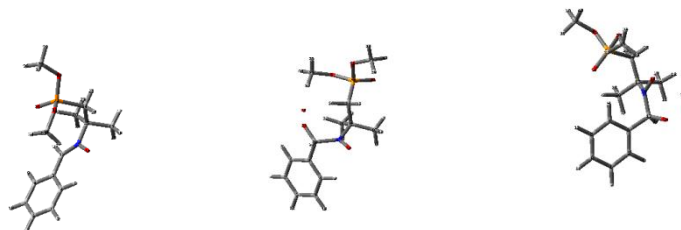

| Compound              | PBN-mono-CH <sub>2</sub> PO(OMe) <sub>2</sub><br>PBN-alpha-methylphosphoryl.log | PBN-mono-CH <sub>2</sub> PO(OMe) <sub>2</sub> -O <sub>2</sub><br>PBN-alpha-methylphosphoryl-O <sub>2</sub> .log | PBN-mono-CH <sub>2</sub> PO(OMe) <sub>2</sub> -HO <sub>2</sub><br>PBN-alpha-methylphosphoryl-HO <sub>2</sub> .log |
|-----------------------|---------------------------------------------------------------------------------|-----------------------------------------------------------------------------------------------------------------|-------------------------------------------------------------------------------------------------------------------|
| file                  |                                                                                 |                                                                                                                 |                                                                                                                   |
| E 6-31+g**/PCM        | -1204.480286                                                                    | -1354.93834                                                                                                     | -1355.426832                                                                                                      |
| E 6-31g*              | -1204.42836                                                                     | -1354.790266                                                                                                    | -1355.360944                                                                                                      |
| ZPE (raw)             | 0.323819                                                                        | 0.328325                                                                                                        | 0.341981                                                                                                          |
| Therm Corr to H (raw) | 0.345276                                                                        | 0.351789                                                                                                        | 0.366286                                                                                                          |
| Therm Corr to G (raw) | 0.273809                                                                        | 0.275433                                                                                                        | 0.287048                                                                                                          |
| H (raw)               |                                                                                 |                                                                                                                 |                                                                                                                   |
| G (raw)               |                                                                                 |                                                                                                                 |                                                                                                                   |
| ZPE (scaled)          | 0.317537                                                                        | 0.321955                                                                                                        | 0.335347                                                                                                          |
| Electronic State      | 1-A                                                                             | 2-A                                                                                                             | 2-A                                                                                                               |
| s2 6-31g*             | 0                                                                               | 0.7548                                                                                                          | 0.7545                                                                                                            |
| Symmetry              | C1                                                                              | C1                                                                                                              | C1                                                                                                                |
| N Imag                | 0.000000                                                                        | 0.000000                                                                                                        | 0.000000                                                                                                          |
| Rotational Con. (GHz) | 0.5818926                                                                       | 0.6081909                                                                                                       | 0.4139879                                                                                                         |
| Rotational Con. (GHz) | 0.2070483                                                                       | 0.1587611                                                                                                       | 0.2016113                                                                                                         |
| Rotational Con. (GHz) | 0.1836735                                                                       | 0.1475025                                                                                                       | 0.1726424                                                                                                         |
| H298                  |                                                                                 |                                                                                                                 |                                                                                                                   |
| 6-31+g* */PCM         | -1204.141292                                                                    | -1354.592921                                                                                                    | -1355.067180                                                                                                      |
| 6-31g*                | -1204.089366                                                                    | -1354.444846                                                                                                    | -1355.001293                                                                                                      |
| G298                  |                                                                                 |                                                                                                                 |                                                                                                                   |
| 6-31+g* */PCM         | -1204.212759                                                                    | -1354.669277                                                                                                    | -1355.146418                                                                                                      |
| 6-31g*                | -1204.160833                                                                    | -1354.521202                                                                                                    | -1355.080531                                                                                                      |

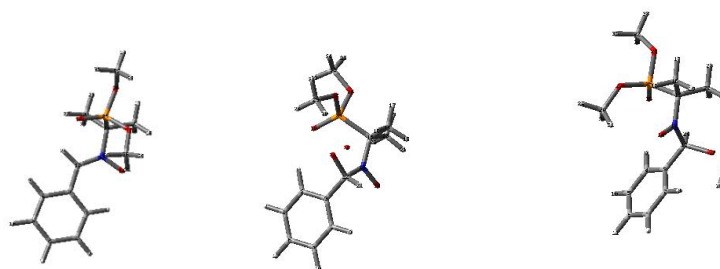

| Compound              | PBN-mono-PO(OMe) <sub>2</sub><br>PBN-alpha-phosphoryl.log | PBN-mono-PO(OMe) <sub>2</sub> -O <sub>2</sub><br>PBN-alpha-phosphoryl-O2.log | PBN-mono-PO(OMe) <sub>2</sub> -HO <sub>2</sub><br>PBN-alpha-phosphoryl-HO2.log |
|-----------------------|-----------------------------------------------------------|------------------------------------------------------------------------------|--------------------------------------------------------------------------------|
| file                  |                                                           |                                                                              |                                                                                |
| E 6-31+g**/PCM        | -1165.154604                                              | -1315.606718                                                                 | -1316.103942                                                                   |
| E 6-31g*              | -1165.107118                                              | -1315.461283                                                                 | -1316.041568                                                                   |
| ZPE (raw)             | 0.294867                                                  | 0.299846                                                                     | 0.312497                                                                       |
| Therm Corr to H (raw) | 0.315401                                                  | 0.322075                                                                     | 0.336239                                                                       |
| Therm Corr to G (raw) | 0.246006                                                  | 0.247934                                                                     | 0.258927                                                                       |
| H (raw)               |                                                           |                                                                              |                                                                                |
| G (raw)               |                                                           |                                                                              |                                                                                |
| ZPE (scaled)          | 0.289147                                                  | 0.294029                                                                     | 0.306435                                                                       |
| Electronic State      | 1-A                                                       | 2-A                                                                          | 2-A                                                                            |
| s2 6-31g*             | 0                                                         | 0.7538                                                                       | 0.7545                                                                         |
| Symmetry              | C1                                                        | C1                                                                           | C1                                                                             |
| N Imag                | 0.000000                                                  | 0.000000                                                                     | 0.000000                                                                       |
| Rotational Con. (GHz) | 0.8125232                                                 | 0.5372962                                                                    | 0.5137355                                                                      |
| Rotational Con. (GHz) | 0.2090801                                                 | 0.2202036                                                                    | 0.229626                                                                       |
| Rotational Con. (GHz) | 0.2061113                                                 | 0.2139904                                                                    | 0.1969613                                                                      |
| H298                  |                                                           |                                                                              |                                                                                |
| 6-31+g* */PCM         | -1164.844923                                              | -1315.290460                                                                 | -1315.773765                                                                   |
| 6-31g*                | -1164.797437                                              | -1315.145025                                                                 | -1315.711391                                                                   |
| G298                  |                                                           |                                                                              |                                                                                |
| 6-31+g* */PCM         | -1164.914318                                              | -1315.364601                                                                 | -1315.851077                                                                   |
| 6-31g*                | -1164.866832                                              | -1315.219166                                                                 | -1315.788703                                                                   |

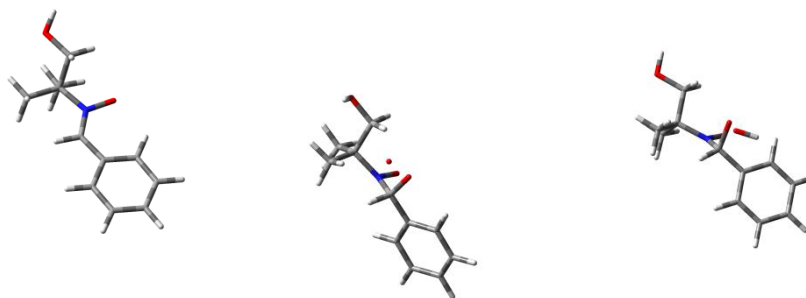

| Compound              | PBN-mono-CH2OH          | PBN-mono-CH2OH-O2          | PBN-mono-CH2OH-HO2          |
|-----------------------|-------------------------|----------------------------|-----------------------------|
| file                  | PBN-alpha-CH2OH.com.log | PBN-alpha-CH2OH-O2.com.log | PBN-alpha-CH2OH-OOH.com.log |
| E 6-31+g**/PCM        | -633.386485             | -783.841955                | -784.333052                 |
| E 6-31g*              | -633.3291896            | -783.6787818               | -784.2598099                |
| ZPE (raw)             | 0.245535                | 0.250361                   | 0.26343                     |
| Therm Corr to H (raw) | 0.260262                | 0.267221                   | 0.28117                     |
| Therm Corr to G (raw) | 0.205034                | 0.206547                   | 0.217995                    |
| H (raw)               |                         |                            |                             |
| G (raw)               |                         |                            |                             |
| ZPE (scaled)          | 0.240772                | 0.245504                   | 0.258319                    |
| Electronic State      | 1-A                     | 2-A                        | 2-A                         |
| s2 6-31g*             | 0                       | 0.7546                     | 0.7545                      |
| Symmetry              | -                       | -                          | -                           |
| N Imag                | 0.000000                | 0.000000                   | 0.000000                    |
| Rotational Con. (GHz) | 1.881173                | 1.1336489                  | 1.060323                    |
| Rotational Con. (GHz) | 0.3146428               | 0.3134301                  | 0.2994421                   |
| Rotational Con. (GHz) | 0.2931836               | 0.2742802                  | 0.2810294                   |
| H298                  |                         |                            |                             |
| 6-31+g* */PCM         | -633.130986             | -783.579591                | -784.056993                 |
| 6-31g*                | -633.073691             | -783.416418                | -783.983750                 |
| G298                  |                         |                            |                             |
| 6-31+g* */PCM         | -633.186214             | -783.640265                | -784.120168                 |
| 6-31g*                | -633.128919             | -783.477092                | -784.046925                 |

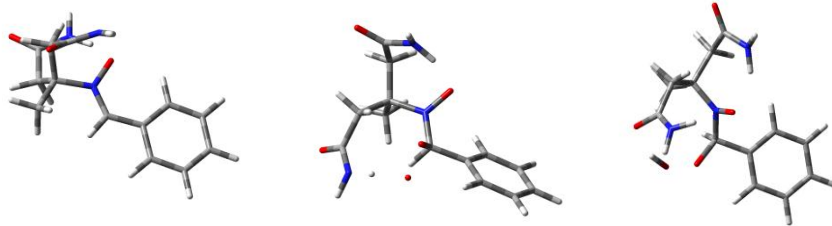

| Compound              | PBN-di-CH <sub>2</sub> CONH <sub>2</sub><br>PBN-CH <sub>2</sub> CONH <sub>2</sub> -<br>2b.com.log | PBN-di-CH <sub>2</sub> CONH <sub>2</sub> -O <sub>2</sub><br>PBN-CH <sub>2</sub> CONH <sub>2</sub> -2-O <sub>2</sub> b.out | PBN-di-CH <sub>2</sub> CONH <sub>2</sub> -HO <sub>2</sub><br>PBN-CH <sub>2</sub> CONH <sub>2</sub> -2-<br>OOH.com.log |
|-----------------------|---------------------------------------------------------------------------------------------------|---------------------------------------------------------------------------------------------------------------------------|-----------------------------------------------------------------------------------------------------------------------|
| file                  |                                                                                                   |                                                                                                                           |                                                                                                                       |
| E 6-31+g**            | -895.608688                                                                                       | -1046.068623                                                                                                              | -1046.549683                                                                                                          |
| E 6-31g*              | -895.5235133                                                                                      | -1045.896431                                                                                                              | -1046.455063                                                                                                          |
| ZPE (raw)             | 0.297269                                                                                          | 0.300883                                                                                                                  | 0.315633                                                                                                              |
| Therm Corr to H (raw) | 0.316223                                                                                          | 0.321845                                                                                                                  | 0.337143                                                                                                              |
| Therm Corr to G (raw) | 0.24985                                                                                           | 0.251196                                                                                                                  | 0.264689                                                                                                              |
| H (raw)               |                                                                                                   |                                                                                                                           |                                                                                                                       |
| G (raw)               |                                                                                                   |                                                                                                                           |                                                                                                                       |
| ZPE (scaled)          | 0.291502                                                                                          | 0.295046                                                                                                                  | 0.309510                                                                                                              |
| Electronic State      | 1-A                                                                                               | 2-A                                                                                                                       | 2-A                                                                                                                   |
| s2 6-31g*             | 0                                                                                                 | 0.7549                                                                                                                    | 0.7543                                                                                                                |
| Symmetry              | -                                                                                                 | C1                                                                                                                        | -                                                                                                                     |
| N Imag                | 0.000000                                                                                          | 0.000000                                                                                                                  | 0.000000                                                                                                              |
| Rotational Con. (GHz) | 0.5588525                                                                                         | 0.4589861                                                                                                                 | 0.4181795                                                                                                             |
| Rotational Con. (GHz) | 0.2267132                                                                                         | 0.217707                                                                                                                  | 0.2437125                                                                                                             |
| Rotational Con. (GHz) | 0.1964316                                                                                         | 0.1872048                                                                                                                 | 0.1808318                                                                                                             |
| H298                  |                                                                                                   |                                                                                                                           |                                                                                                                       |
| 6-31+g* *             | -895.298232                                                                                       | -1045.752615                                                                                                              | -1046.218663                                                                                                          |
| 6-31g*                | -895.213057                                                                                       | -1045.580423                                                                                                              | -1046.124043                                                                                                          |
| G298                  |                                                                                                   |                                                                                                                           |                                                                                                                       |
| 6-31+g* *             | -895.364605                                                                                       | -1045.823264                                                                                                              | -1046.291117                                                                                                          |
| 6-31g*                | -895.279430                                                                                       | -1045.651072                                                                                                              | -1046.196497                                                                                                          |

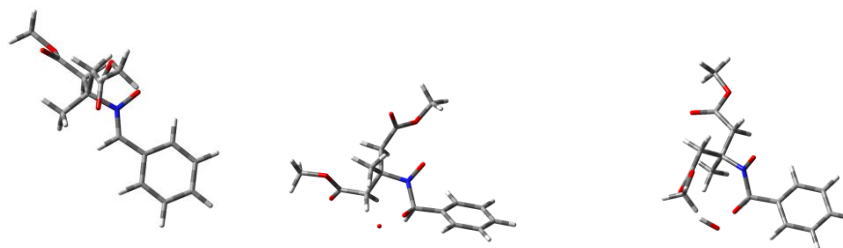

| Compound              | PBN-di-CH <sub>2</sub> COOMe        | PBN-di-CH <sub>2</sub> COOMe-O <sub>2</sub>         | PBN-di-CH <sub>2</sub> COOMe-HO <sub>2</sub> |
|-----------------------|-------------------------------------|-----------------------------------------------------|----------------------------------------------|
| file                  | PBN-CH <sub>2</sub> COOMe-2.com.log | PBN-CH <sub>2</sub> COOMe-2-O <sub>2</sub> .com.log | PBN-CH <sub>2</sub> COOMe-2-OOH.com.log      |
| E 6-31+g**            | -1013.924528                        | -1164.376051                                        | -1164.867596                                 |
| E 6-31g*              | -1013.867597                        | -1164.217074                                        | -1164.80117                                  |
| ZPE (raw)             | 0.327684                            | 0.331811                                            | 0.346776                                     |
| Therm Corr to H (raw) | 0.349968                            | 0.356154                                            | 0.371318                                     |
| Therm Corr to G (raw) | 0.274478                            | 0.276449                                            | 0.29057                                      |
| H (raw)               |                                     |                                                     |                                              |
| G (raw)               |                                     |                                                     |                                              |
| ZPE (scaled)          | 0.321327                            | 0.325374                                            | 0.340049                                     |
| Electronic State      | 1-A                                 | 2-A                                                 | 2-A                                          |
| s2 6-31g*             | 0                                   | 0.7545                                              | 0.7544                                       |
| Symmetry              | -                                   | -                                                   | -                                            |
| N Imag                | 0.000000                            | 0                                                   | #NAME?                                       |
| Rotational Con. (GHz) | 0.3877542                           | 0.3405549                                           | 0.3163775                                    |
| Rotational Con. (GHz) | 0.1750447                           | 0.1769674                                           | 0.1815871                                    |
| Rotational Con. (GHz) | 0.1356954                           | 0.1340257                                           | 0.1296106                                    |
| H298                  |                                     |                                                     |                                              |
| 6-31+g* *             | -1013.580917                        | -1164.026334                                        | -1164.503005                                 |
| 6-31g*                | -1013.523986                        | -1163.867358                                        | -1164.436580                                 |
| G298                  |                                     |                                                     |                                              |
| 6-31+g* *             | -1013.656407                        | -1164.106039                                        | -1164.583753                                 |
| 6-31g*                | -1013.599476                        | -1163.947063                                        | -1164.517328                                 |

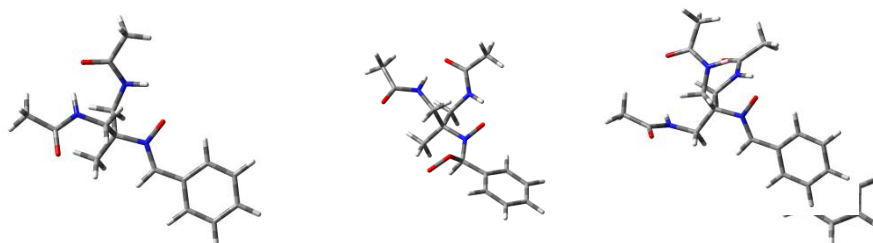

| Compound              | PBN-di-CH2NHCOMe<br>PBN-CH2NHCOMe-<br>2.com.log | PBN-di-CH2NHCOMe-O2<br>PBN-CH2NHCOMe-2-<br>O2.com.log | PBN-di-CH2NHCOMe-HO2<br>PBN-CH2NHCOMe-2-<br>OOH.com.log |
|-----------------------|-------------------------------------------------|-------------------------------------------------------|---------------------------------------------------------|
| file                  |                                                 |                                                       |                                                         |
| E 6-31+g**            | -974.225418                                     | -1124.66851                                           | -1125.16982                                             |
| E 6-31g*              | -974.1569283                                    | -1124.507959                                          | -1125.09215                                             |
| ZPE (raw)             | 0.353082                                        | 0.356848                                              | 0.372446                                                |
| Therm Corr to H (raw) | 0.375503                                        | 0.381647                                              | 0.397057                                                |
| Therm Corr to G (raw) | 0.300245                                        | 0.300378                                              | 0.317576                                                |
| H (raw)               |                                                 |                                                       |                                                         |
| G (raw)               |                                                 |                                                       |                                                         |
| ZPE (scaled)          | 0.346232                                        | 0.349925                                              | 0.365221                                                |
| Electronic State      | 1-A                                             | 2-A                                                   | 2-A                                                     |
| s2 6-31g*             | 0                                               | 0.7567                                                | 0.7546                                                  |
| Symmetry              | -                                               | -                                                     | -                                                       |
| N Imag                | 0.000000                                        | 0.000000                                              | 0.000000                                                |
| Rotational Con. (GHz) | 0.4938187                                       | 0.4262188                                             | 0.3826867                                               |
| Rotational Con. (GHz) | 0.1590578                                       | 0.1534529                                             | 0.1659876                                               |
| Rotational Con. (GHz) | 0.1297505                                       | 0.1216589                                             | 0.1280072                                               |
| H298                  |                                                 |                                                       |                                                         |
| 6-31+g* *             | -973.856765                                     | -1124.293786                                          | -1124.779988                                            |
| 6-31g*                | -973.788275                                     | -1124.133235                                          | -1124.702318                                            |
| G298                  |                                                 |                                                       |                                                         |
| 6-31+g* *             | -973.932023                                     | -1124.375055                                          | -1124.859469                                            |
| 6-31g*                | -973.863533                                     | -1124.214504                                          | -1124.781799                                            |

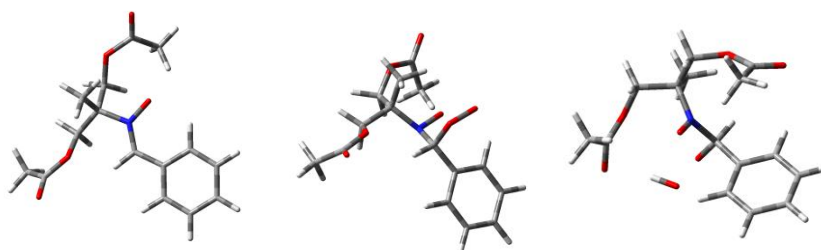

| Compound                     | PBN-di-CH2OCOMe<br>PBN-CH2OCOMe-<br>2.com.log | PBN-di-CH2OCOMe-O2<br>PBN-CH2OCOMe-2-<br>O2.com.log | PBN-di-CH2OCOMe-HO2<br>PBN-CH2OCOMe-2-<br>OOHb.com.log |
|------------------------------|-----------------------------------------------|-----------------------------------------------------|--------------------------------------------------------|
| file                         |                                               |                                                     |                                                        |
| <b>E 6-31+g**/PCM</b>        | -1013.913271                                  | -1164.357442                                        | -1164.86404                                            |
| <b>E 6-31g*</b>              | -1013.844878                                  | -1164.19332                                         | -1164.789871                                           |
| <b>ZPE (raw)</b>             | 0.326721                                      | 0.331182                                            | 0.346435                                               |
| <b>Therm Corr to H (raw)</b> | 0.348848                                      | 0.355389                                            | 0.370681                                               |
| <b>Therm Corr to G (raw)</b> | 0.27417                                       | 0.275547                                            | 0.292381                                               |
| <b>H (raw)</b>               |                                               |                                                     |                                                        |
| <b>G (raw)</b>               |                                               |                                                     |                                                        |
| <b>ZPE (scaled)</b>          | 0.320383                                      | 0.324757                                            | 0.339714                                               |
| <b>Electronic State</b>      | 1-A                                           | 2-A                                                 | 2-A                                                    |
| <b>s2 6-31g*</b>             | 0                                             | 0.7571                                              | 0.7545                                                 |
| <b>Symmetry</b>              | -                                             | -                                                   | -                                                      |
| <b>N Imag</b>                | 0.000000                                      | 0                                                   | 0.000000                                               |
| <b>Rotational Con. (GHz)</b> | 0.2761823                                     | 0.2482736                                           | 0.3392005                                              |
| <b>Rotational Con. (GHz)</b> | 0.2386522                                     | 0.2212898                                           | 0.2308601                                              |
| <b>Rotational Con. (GHz)</b> | 0.1366976                                     | 0.1388095                                           | 0.1680063                                              |
| <b>H298</b>                  |                                               |                                                     |                                                        |
| <b>6-31+g* */PCM</b>         | -1013.570761                                  | -1164.008478                                        | -1164.500080                                           |
| <b>6-31g*</b>                | -1013.502368                                  | -1163.844356                                        | -1164.425911                                           |
| <b>G298</b>                  |                                               |                                                     |                                                        |
| <b>6-31+g* */PCM</b>         | -1013.645439                                  | -1164.088320                                        | -1164.578380                                           |
| <b>6-31g*</b>                | -1013.577046                                  | -1163.924198                                        | -1164.504211                                           |



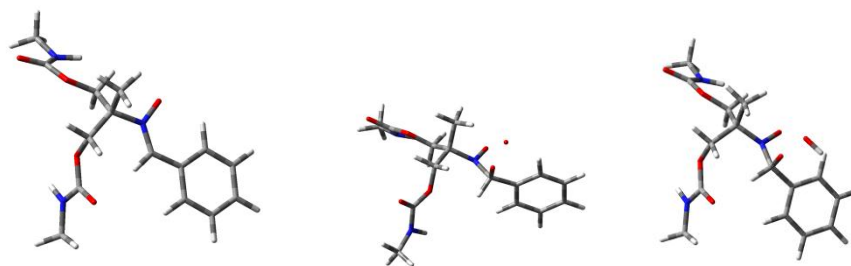

| Compound              | PBN-di-CH <sub>2</sub> OCONHMe<br>PBN-CH <sub>2</sub> OCONHMe-<br>2.com.log | PBN-di-CH <sub>2</sub> OCONHMe-O <sub>2</sub><br>PBN-CH <sub>2</sub> OCONHMe-2-<br>O <sub>2</sub> .com.log | PBN-di-CH <sub>2</sub> OCONHMe-HO <sub>2</sub><br>PBN-CH <sub>2</sub> OCONHMe-2-<br>OOH.com.log |
|-----------------------|-----------------------------------------------------------------------------|------------------------------------------------------------------------------------------------------------|-------------------------------------------------------------------------------------------------|
| file                  |                                                                             |                                                                                                            |                                                                                                 |
| E 6-31+g**/PCM        | -1124.664605                                                                | -1275.117868                                                                                               | -1275.611246                                                                                    |
| E 6-31g*              | -1124.585256                                                                | -1274.93471                                                                                                | -1275.515814                                                                                    |
| ZPE (raw)             | 0.362621                                                                    | 0.366191                                                                                                   | 0.380703                                                                                        |
| Therm Corr to H (raw) | 0.38765                                                                     | 0.393737                                                                                                   | 0.408674                                                                                        |
| Therm Corr to G (raw) | 0.30577                                                                     | 0.30473                                                                                                    | 0.319228                                                                                        |
| H (raw)               |                                                                             |                                                                                                            |                                                                                                 |
| G (raw)               |                                                                             |                                                                                                            |                                                                                                 |
| ZPE (scaled)          | 0.355586                                                                    | 0.359087                                                                                                   | 0.373317                                                                                        |
| Electronic State      | 1-A                                                                         | 2-A                                                                                                        | 2-A                                                                                             |
| s2 6-31g*             | 0                                                                           | 0.7547                                                                                                     | 0.7545                                                                                          |
| Symmetry              | -                                                                           | -                                                                                                          | -                                                                                               |
| N Imag                | 0                                                                           | 0                                                                                                          | 0.000000                                                                                        |
| Rotational Con. (GHz) | 0.336010                                                                    | 0.2585699                                                                                                  | 0.2907537                                                                                       |
| Rotational Con. (GHz) | 0.1446169                                                                   | 0.1300155                                                                                                  | 0.1341495                                                                                       |
| Rotational Con. (GHz) | 0.1176766                                                                   | 0.1093048                                                                                                  | 0.1143833                                                                                       |
| H298                  |                                                                             |                                                                                                            |                                                                                                 |
| 6-31+g* */PCM         | -1124.283990                                                                | -1274.731235                                                                                               | -1275.209958                                                                                    |
| 6-31g*                | -1124.204641                                                                | -1274.548077                                                                                               | -1275.114525                                                                                    |
| G298                  |                                                                             |                                                                                                            |                                                                                                 |
| 6-31+g* */PCM         | -1124.365870                                                                | -1274.820242                                                                                               | -1275.299404                                                                                    |
| 6-31g*                | -1124.286521                                                                | -1274.637084                                                                                               | -1275.203971                                                                                    |

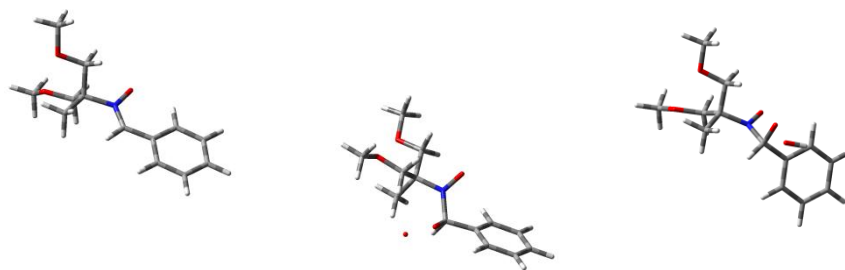

| Compound              | PBN-di-CH <sub>2</sub> OMe        | PBN-di-CH <sub>2</sub> OMe-O <sub>2</sub>         | PBN-di-CH <sub>2</sub> OMe-HO <sub>2</sub> |
|-----------------------|-----------------------------------|---------------------------------------------------|--------------------------------------------|
| file                  | PBN-CH <sub>2</sub> OMe-2.com.log | PBN-CH <sub>2</sub> OMe-2-O <sub>2</sub> .com.log | PBN-CH <sub>2</sub> OMe-2-OOH.com.log      |
| E 6-31+g**/PCM        | -787.192622                       | -937.647622                                       | -938.139038                                |
| E 6-31g*              | -787.1462878                      | -937.4937824                                      | -938.076951                                |
| ZPE (raw)             | 0.307167                          | 0.311322                                          | 0.325021                                   |
| Therm Corr to H (raw) | 0.325873                          | 0.33232                                           | 0.346764                                   |
| Therm Corr to G (raw) | 0.260061                          | 0.26084                                           | 0.273089                                   |
| H (raw)               |                                   |                                                   |                                            |
| G (raw)               |                                   |                                                   |                                            |
| ZPE (scaled)          | 0.301208                          | 0.305282                                          | 0.318716                                   |
| Electronic State      | 1-A                               | 2-A                                               | 2-A                                        |
| s2 6-31g*             | 0                                 | 0.7546                                            | 0.7545                                     |
| Symmetry              | -                                 | -                                                 | -                                          |
| N Imag                | 0.000000                          | 0                                                 | 0.000000                                   |
| Rotational Con. (GHz) | 0.9270825                         | 0.6616418                                         | 0.6426955                                  |
| Rotational Con. (GHz) | 0.205163                          | 0.2148467                                         | 0.2038581                                  |
| Rotational Con. (GHz) | 0.1939656                         | 0.1777364                                         | 0.1786212                                  |
| H298                  |                                   |                                                   |                                            |
| 6-31+g* */PCM         | -786.872708                       | -937.321342                                       | -937.798579                                |
| 6-31g*                | -786.826374                       | -937.167502                                       | -937.736492                                |
| G298                  |                                   |                                                   |                                            |
| 6-31+g* */PCM         | -786.938520                       | -937.392822                                       | -937.872254                                |
| 6-31g*                | -786.892186                       | -937.238982                                       | -937.810167                                |

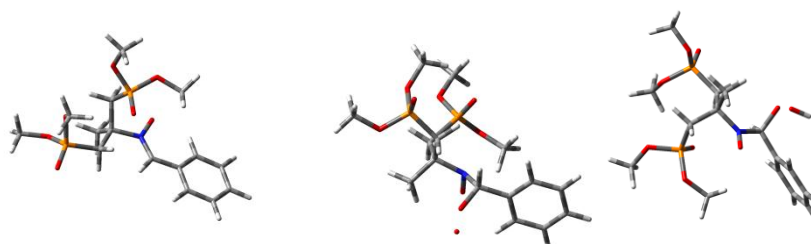

| Compound                     | PBN-di-CH2POOMe2        | PBN-di-CH2POOMe2-O2      | PBN-di-CH2POOMe2-HO2      |
|------------------------------|-------------------------|--------------------------|---------------------------|
| file                         | PBN-CH2POOMe2-2.com.log | PBN-CH2POOMe2-O2.com.log | PBN-CH2POOMe2-OOH.com.log |
| <b>E 6-31+g**/PCM</b>        | -1850.796446            | -2001.242029             | -2001.743048              |
| <b>E 6-31g*</b>              | -1850.725907            | -2001.077036             | -2001.655316              |
| <b>ZPE (raw)</b>             | 0.406748                | 0.410689                 | 0.42457                   |
| <b>Therm Corr to H (raw)</b> | 0.436391                | 0.442512                 | 0.4573                    |
| <b>Therm Corr to G (raw)</b> | 0.345665                | 0.34682                  | 0.358632                  |
| <b>H (raw)</b>               |                         |                          |                           |
| <b>G (raw)</b>               |                         |                          |                           |
| <b>ZPE (scaled)</b>          | 0.398857                | 0.402722                 | 0.416333                  |
| <b>Electronic State</b>      | 1-A                     | 2-A                      | 2-A                       |
| <b>s2 6-31g*</b>             | 0                       | 0.7564                   | 0.7545                    |
| <b>Symmetry</b>              | -                       | -                        | -                         |
| <b>N Imag</b>                | 0.000000                | 0.000000                 | 0.000000                  |
| <b>Rotational Con. (GHz)</b> | 0.2733572               | 0.2403124                | 0.2436947                 |
| <b>Rotational Con. (GHz)</b> | 0.1289011               | 0.1233458                | 0.1246421                 |
| <b>Rotational Con. (GHz)</b> | 0.1048025               | 0.0996822                | 0.098627                  |
| <b>H298</b>                  |                         |                          |                           |
| <b>6-31+g* */PCM</b>         | -1850.367946            | -2000.807484             | -2001.293985              |
| <b>6-31g*</b>                | -1850.297407            | -2000.642492             | -2001.206252              |
| <b>G298</b>                  |                         |                          |                           |
| <b>6-31+g* */PCM</b>         | -1850.458672            | -2000.903176             | -2001.392653              |
| <b>6-31g*</b>                | -1850.388133            | -2000.738184             | -2001.304920              |

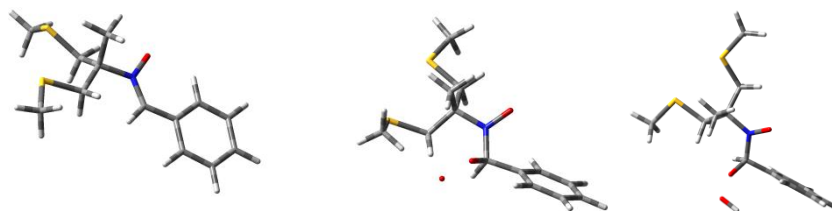

| Compound              | PBN-di-CH2SMe        | PBN-di-CH2SMe-O2        | PBN-di-CH2SMe-HO2        |
|-----------------------|----------------------|-------------------------|--------------------------|
| file                  | PBN-CH2SMe-2.com.log | PBN-CH2SMe-2-O2.com.log | PBN-CH2SMe-2-OOH.com.log |
| E 6-31+g**/PCM        | -1433.151196         | -1583.606249            | -1584.097939             |
| E 6-31g*              | -1433.105498         | -1583.464857            | -1584.03669              |
| ZPE (raw)             | 0.299351             | 0.30419                 | 0.317298                 |
| Therm Corr to H (raw) | 0.319418             | 0.326135                | 0.340361                 |
| Therm Corr to G (raw) | 0.249407             | 0.252093                | 0.262612                 |
| H (raw)               |                      |                         |                          |
| G (raw)               |                      |                         |                          |
| ZPE (scaled)          | 0.293544             | 0.298289                | 0.311142                 |
| Electronic State      | 1-A                  | 2-A                     | 2-A                      |
| s2 6-31g*             | 0                    | 0.7548                  | 0.7545                   |
| Symmetry              | -                    | -                       | -                        |
| N Imag                | #NAME?               | 0                       | 0                        |
| Rotational Con. (GHz) | 0.6103007            | 0.500021                | 0.4728437                |
| Rotational Con. (GHz) | 0.1827722            | 0.1843271               | 0.1727731                |
| Rotational Con. (GHz) | 0.152148             | 0.144671                | 0.1460972                |
| H298                  |                      |                         |                          |
| 6-31+g* */PCM         | -1432.837585         | -1583.286015            | -1583.763734             |
| 6-31g*                | -1432.791887         | -1583.144624            | -1583.702485             |
| G298                  |                      |                         |                          |
| 6-31+g* */PCM         | -1432.907596         | -1583.360057            | -1583.841483             |
| 6-31g*                | -1432.861898         | -1583.218666            | -1583.780234             |

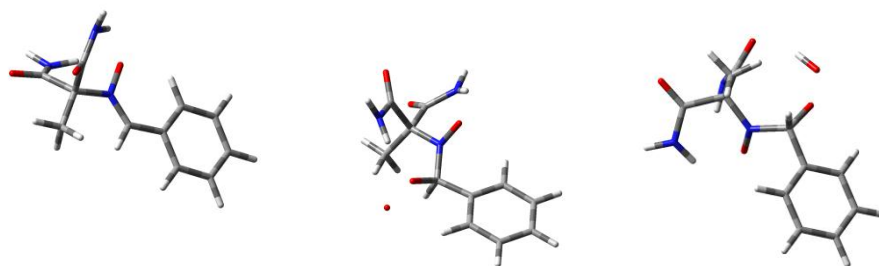

| Compound              | PBN-di-CONH2        | PBN-di-CONH2-O2     | PBN-di-CONH2-HO2        |
|-----------------------|---------------------|---------------------|-------------------------|
| file                  | PBN-CONH2-2.com.log | PBN-CONH2-2-O2b.out | PBN-CONH2-2-OOH.com.log |
| E 6-31+g**/PCM        | -816.967225         | -967.427401         | -967.910678             |
| E 6-31g*              | -816.8917475        | -967.2529942        | -967.8252959            |
| ZPE (raw)             | 0.239143            | 0.243073            | 0.25773                 |
| Therm Corr to H (raw) | 0.255588            | 0.26212             | 0.276787                |
| Therm Corr to G (raw) | 0.195643            | 0.196165            | 0.210597                |
| H (raw)               |                     |                     |                         |
| G (raw)               |                     |                     |                         |
| ZPE (scaled)          | 0.234504            | 0.238357            | 0.252730                |
| Electronic State      | 1-A                 | 2-A                 | 2-A                     |
| s2 6-31g*             | 0                   | 0.755               | 0.7544                  |
| Symmetry              | -                   | -                   | -                       |
| N Imag                | 0.000000            | 0.000000            | 0.000000                |
| Rotational Con. (GHz) | 0.9998412           | 0.6927609           | 0.6805595               |
| Rotational Con. (GHz) | 0.2474605           | 0.2552142           | 0.2634044               |
| Rotational Con. (GHz) | 0.2412536           | 0.2170205           | 0.2192377               |
| H298                  |                     |                     |                         |
| 6-31+g* */PCM         | -816.716276         | -967.169997         | -967.638891             |
| 6-31g*                | -816.640799         | -966.995590         | -967.553509             |
| G298                  |                     |                     |                         |
| 6-31+g* */PCM         | -816.776221         | -967.235952         | -967.705081             |
| 6-31g*                | -816.700744         | -967.061545         | -967.619699             |

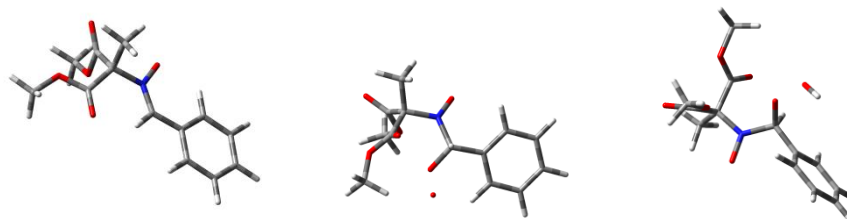

| Compound              | PBN-di-COOMe        | PBN-di-COOMe-O2        | PBN-di-COOMe-HO2        |
|-----------------------|---------------------|------------------------|-------------------------|
| file                  | PBN-COOMe-2.com.log | PBN-COOMe-2-O2.com.log | PBN-COOMe-2-OOH.com.log |
| E 6-31+g**/PCM        | -935.273697         | -1085.723619           | -1086.221164            |
| E 6-31g*              | -935.2270617        | -1085.576708           | -1086.157529            |
| ZPE (raw)             | 0.269718            | 0.274318               | 0.287619                |
| Therm Corr to H (raw) | 0.289686            | 0.296217               | 0.310577                |
| Therm Corr to G (raw) | 0.220754            | 0.223428               | 0.234121                |
| H (raw)               |                     |                        |                         |
| G (raw)               |                     |                        |                         |
| ZPE (scaled)          | 0.264485            | 0.268996               | 0.282039                |
| Electronic State      | 1-A                 | 2-A                    | 2-A                     |
| s2 6-31g*             | 0                   | 0.7547                 | 0.7544                  |
| Symmetry              | -                   | -                      | -                       |
| N Imag                | 0.000000            | 0                      | 0.000000                |
| Rotational Con. (GHz) | 0.6681324           | 0.5073967              | 0.5203791               |
| Rotational Con. (GHz) | 0.2197261           | 0.2283274              | 0.2170866               |
| Rotational Con. (GHz) | 0.1914851           | 0.2059091              | 0.1964494               |
| H298                  |                     |                        |                         |
| 6-31+g* */PCM         | -934.989244         | -1085.432724           | -1085.916167            |
| 6-31g*                | -934.942608         | -1085.285813           | -1085.852532            |
| G298                  |                     |                        |                         |
| 6-31+g* */PCM         | -935.058176         | -1085.505513           | -1085.992623            |
| 6-31g*                | -935.011540         | -1085.358602           | -1085.928988            |

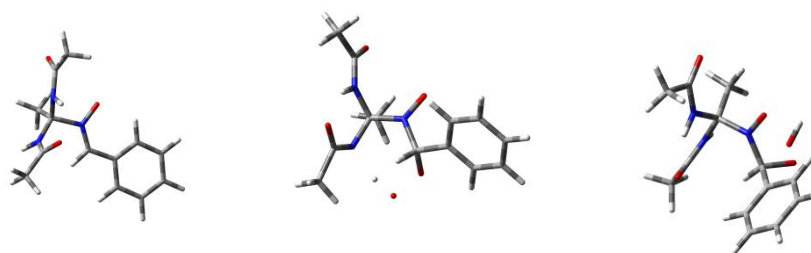

| Compound                     | PBN-di-NHCOMe         | PBN-di-NHCOMe-O2        | PBN-di-NHCOMe-HO2        |
|------------------------------|-----------------------|-------------------------|--------------------------|
| file                         | PBN-NHCOMe-2b.com.log | PBN-NHCOMe-2-O2.com.log | PBN-NHCOMe-2-OOH.com.log |
| <b>E 6-31+g**/PCM</b>        | -895.583199           | -1046.047989            | -1046.529439             |
| <b>E 6-31g*</b>              | -895.5152711          | -1045.905594            | -1046.448285             |
| <b>ZPE (raw)</b>             | 0.293686              | 0.298496                | 0.311861                 |
| <b>Therm Corr to H (raw)</b> | 0.313882              | 0.320624                | 0.335147                 |
| <b>Therm Corr to G (raw)</b> | 0.244226              | 0.245886                | 0.256984                 |
| <b>H (raw)</b>               |                       |                         |                          |
| <b>G (raw)</b>               |                       |                         |                          |
| <b>ZPE (scaled)</b>          | 0.287988              | 0.292705                | 0.305811                 |
| <b>Electronic State</b>      | 1-A                   | 2-A                     | 2-A                      |
| <b>s2 6-31g*</b>             | 0                     | 0.7546                  | 0.7543                   |
| <b>Symmetry</b>              | -                     | -                       | -                        |
| <b>N Imag</b>                | 0.000000              | 0.000000                | 0.000000                 |
| <b>Rotational Con. (GHz)</b> | 0.5486251             | 0.4347278               | 0.3768631                |
| <b>Rotational Con. (GHz)</b> | 0.2332209             | 0.2168382               | 0.2325585                |
| <b>Rotational Con. (GHz)</b> | 0.1883868             | 0.1832114               | 0.2192871                |
| <b>H298</b>                  |                       |                         |                          |
| <b>6-31+g* */PCM</b>         | -895.275015           | -1045.733156            | -1046.200342             |
| <b>6-31g*</b>                | -895.207087           | -1045.590761            | -1046.119188             |
| <b>G298</b>                  |                       |                         |                          |
| <b>6-31+g* */PCM</b>         | -895.344671           | -1045.807894            | -1046.278505             |
| <b>6-31g*</b>                | -895.276743           | -1045.665499            | -1046.197351             |

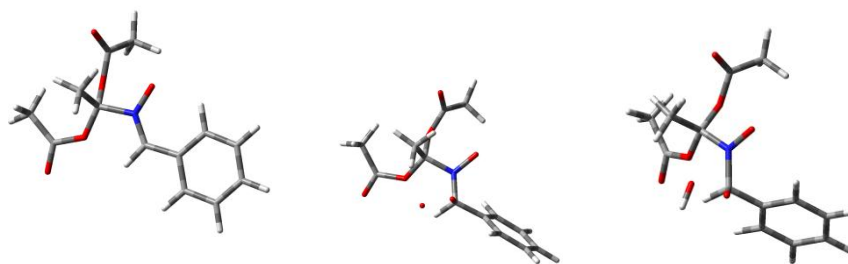

| Compound              | PBN-di-OCOMe        | PBN-di-OCOMe-O2        | PBN-di-OCOMe-HO2        |
|-----------------------|---------------------|------------------------|-------------------------|
| file                  | PBN-OCOMe-2.com.log | PBN-OCOMe-2-O2.com.log | PBN-OCOMe-2-OOH.com.log |
| E 6-31+g**/PCM        | -935.28529          | -1085.744111           | -1086.236595            |
| E 6-31g*              | -935.2346248        | -1085.587059           | -1086.165281            |
| ZPE (raw)             | 0.267743            | 0.272034               | 0.285313                |
| Therm Corr to H (raw) | 0.287488            | 0.293885               | 0.308428                |
| Therm Corr to G (raw) | 0.218983            | 0.219931               | 0.229695                |
| H (raw)               |                     |                        |                         |
| G (raw)               |                     |                        |                         |
| ZPE (scaled)          | 0.262549            | 0.266757               | 0.279778                |
| Electronic State      | 1-A                 | 2-A                    | 2-A                     |
| s2 6-31g*             | 0                   | 0.7546                 | 0.7542                  |
| Symmetry              | -                   | -                      | -                       |
| N Imag                | 0.000000            | 0                      | 0.000000                |
| Rotational Con. (GHz) | 0.5980483           | 0.4582455              | 0.3980708               |
| Rotational Con. (GHz) | 0.2238111           | 0.2081842              | 0.221057                |
| Rotational Con. (GHz) | 0.1778077           | 0.18249                | 0.2065701               |
| H298                  |                     |                        |                         |
| 6-31+g* */PCM         | -935.002996         | -1085.455503           | -1085.933702            |
| 6-31g*                | -934.952331         | -1085.298452           | -1085.862388            |
| G298                  |                     |                        |                         |
| 6-31+g* */PCM         | -935.071501         | -1085.529457           | -1086.012435            |
| 6-31g*                | -935.020836         | -1085.372406           | -1085.941121            |



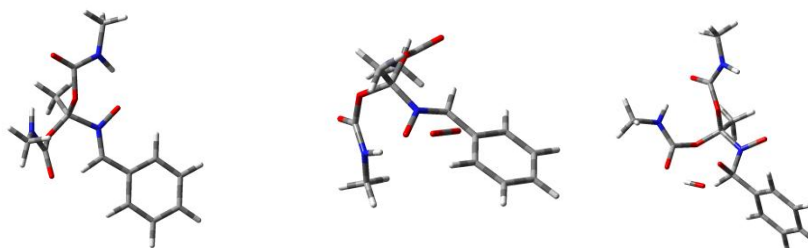

| Compound              | PBN-di-OCONHMe        | PBN-di-OCONHMe-O2        | PBN-di-OCONHMe-HO2        |
|-----------------------|-----------------------|--------------------------|---------------------------|
| file                  | PBN-OCONHMe-2.com.log | PBN-OCONHMe-2-O2.com.log | PBN-OCONHMe-2-OOH.com.log |
| E 6-31+g**/PCM        | -1046.023898          | -1196.475502             | -1196.978227              |
| E 6-31g*              | -1045.967703          | -1196.333811             | -1196.90336               |
| ZPE (raw)             | 0.303736              | 0.307055                 | 0.322599                  |
| Therm Corr to H (raw) | 0.325982              | 0.331969                 | 0.347296                  |
| Therm Corr to G (raw) | 0.251002              | 0.25256                  | 0.266084                  |
| H (raw)               |                       |                          |                           |
| G (raw)               |                       |                          |                           |
| ZPE (scaled)          | 0.297844              | 0.301098                 | 0.316341                  |
| Electronic State      | 1-A                   | 2-A                      | 2-A                       |
| s2 6-31g*             | 0                     | 0.7748                   | 0.7543                    |
| Symmetry              | -                     | -                        | -                         |
| N Imag                | 0.000000              | 0                        | 0.000000                  |
| Rotational Con. (GHz) | 0.434830              | 0.3664712                | 0.4442124                 |
| Rotational Con. (GHz) | 0.1992356             | 0.2103622                | 0.1641014                 |
| Rotational Con. (GHz) | 0.1497767             | 0.1925606                | 0.141354                  |
| H298                  |                       |                          |                           |
| 6-31+g* */PCM         | -1045.703808          | -1196.149490             | -1196.637189              |
| 6-31g*                | -1045.647613          | -1196.007799             | -1196.562322              |
| G298                  |                       |                          |                           |
| 6-31+g* */PCM         | -1045.778788          | -1196.228899             | -1196.718401              |
| 6-31g*                | -1045.722593          | -1196.087208             | -1196.643534              |

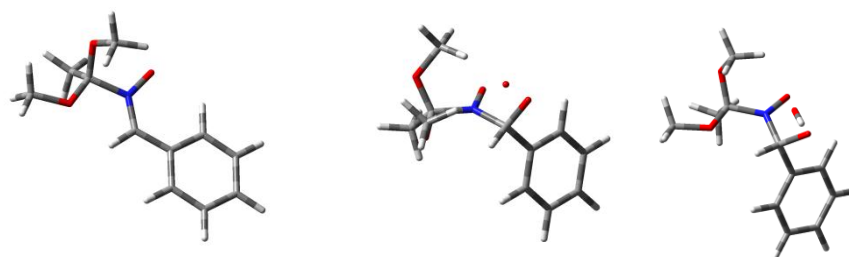

| Compound              | PBN-di-OMe        | PBN-di-OMe-O2        | PBN-di-OMe-HO2        |
|-----------------------|-------------------|----------------------|-----------------------|
| file                  | PBN-OMe-2.com.log | PBN-OMe-2-O2.com.log | PBN-OMe-2-OOH.com.log |
| E 6-31+g**/PCM        | -708.583187       | -859.036735          | -859.53447            |
| E 6-31g*              | -708.5418502      | -858.8887596         | -859.4724606          |
| ZPE (raw)             | 0.249635          | 0.254451             | 0.267219              |
| Therm Corr to H (raw) | 0.265514          | 0.272274             | 0.286427              |
| Therm Corr to G (raw) | 0.20741           | 0.209597             | 0.219107              |
| H (raw)               |                   |                      |                       |
| G (raw)               |                   |                      |                       |
| ZPE (scaled)          | 0.244792          | 0.249515             | 0.262035              |
| Electronic State      | 1-A               | 2-A                  | 2-A                   |
| s2 6-31g*             | 0                 | 0.7545               | 0.7541                |
| Symmetry              | -                 | -                    | -                     |
| N Imag                | 0.000000          | 0                    | 0.000000              |
| Rotational Con. (GHz) | 1.339486          | 0.8535862            | 0.7588646             |
| Rotational Con. (GHz) | 0.3108924         | 0.3128262            | 0.3241001             |
| Rotational Con. (GHz) | 0.2864296         | 0.293851             | 0.2883744             |
| H298                  |                   |                      |                       |
| 6-31+g* */PCM         | -708.322516       | -858.769397          | -859.253227           |
| 6-31g*                | -708.281179       | -858.621422          | -859.191218           |
| G298                  |                   |                      |                       |
| 6-31+g* */PCM         | -708.380620       | -858.832074          | -859.320547           |
| 6-31g*                | -708.339283       | -858.684099          | -859.258538           |

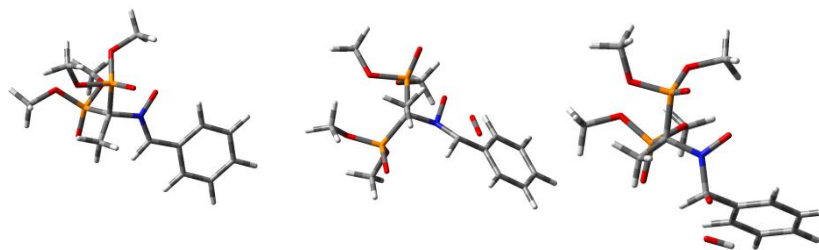

| Compound              | PBN-di-POOMe2        | PBN-di-POOMe2-O2       | PBN-di-POOMe2-HO2      |
|-----------------------|----------------------|------------------------|------------------------|
| file                  | PBN-POOMe2-2.com.log | PBN-POOMe2-O2b.com.log | PBN-POOMe2-OOH.com.log |
| E 6-31+g**/PCM        | -1772.142353         | -1922.577801           | -1923.089866           |
| E 6-31g*              | -1772.080491         | -1922.434641           | -1923.012883           |
| ZPE (raw)             | 0.348356             | 0.351922               | 0.366298               |
| Therm Corr to H (raw) | 0.37603              | 0.382056               | 0.397069               |
| Therm Corr to G (raw) | 0.289757             | 0.287907               | 0.302943               |
| H (raw)               |                      |                        |                        |
| G (raw)               |                      |                        |                        |
| ZPE (scaled)          | 0.341598             | 0.345095               | 0.359192               |
| Electronic State      | 1-A                  | 2-A                    | 2-A                    |
| s2 6-31g*             | 0                    | 0.755                  | 0.7544                 |
| Symmetry              | -                    | -                      | -                      |
| N Imag                | 0.000000             | 0                      | #NAME?                 |
| Rotational Con. (GHz) | 0.368157             | 0.2944433              | 0.3046197              |
| Rotational Con. (GHz) | 0.1560011            | 0.1463166              | 0.1486291              |
| Rotational Con. (GHz) | 0.1367643            | 0.1345963              | 0.1364043              |
| H298                  |                      |                        |                        |
| 6-31+g* */PCM         | -1771.773081         | -1922.202572           | -1922.699903           |
| 6-31g*                | -1771.711219         | -1922.059413           | -1922.622920           |
| G298                  |                      |                        |                        |
| 6-31+g* */PCM         | -1771.859354         | -1922.296721           | -1922.794029           |
| 6-31g*                | -1771.797492         | -1922.153562           | -1922.717046           |

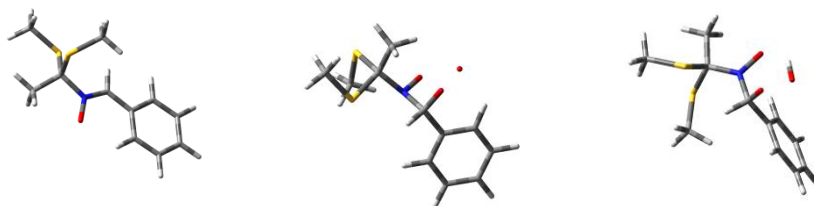

| Compound              | PBN-di-SMe         | PBN-di-SMe-O2          | PBN-di-SMe-HO2         |
|-----------------------|--------------------|------------------------|------------------------|
| file                  | PBN-SMe-2b.com.log | PBN-SMe-2-O2-b.com.log | PBN-SMe-2-OOHb.com.log |
| E 6-31+g**/PCM        | -1354.519583       | -1504.967169           | -1505.465619           |
| E 6-31g*              | -1354.481285       | -1504.828137           | -1505.4165             |
| ZPE (raw)             | 0.241748           | 0.246084               | 0.260385               |
| Therm Corr to H (raw) | 0.259119           | 0.265551               | 0.280373               |
| Therm Corr to G (raw) | 0.197009           | 0.198242               | 0.211348               |
| H (raw)               |                    |                        |                        |
| G (raw)               |                    |                        |                        |
| ZPE (scaled)          | 0.237058           | 0.241310               | 0.255334               |
| Electronic State      | 1-A                | 2-A                    | 2-A                    |
| s2 6-31g*             | 0                  | 0.7556                 | 0.7546                 |
| Symmetry              | -                  | -                      | -                      |
| N Imag                | 0.000000           | 0                      | 0                      |
| Rotational Con. (GHz) | 0.946050           | 0.6819104              | 0.6349068              |
| Rotational Con. (GHz) | 0.2550738          | 0.2436834              | 0.273674               |
| Rotational Con. (GHz) | 0.245413           | 0.2329895              | 0.2417374              |
| H298                  |                    |                        |                        |
| 6-31+g* */PCM         | -1354.265154       | -1504.706392           | -1505.190297           |
| 6-31g*                | -1354.226855       | -1504.567360           | -1505.141179           |
| G298                  |                    |                        |                        |
| 6-31+g* */PCM         | -1354.327264       | -1504.773701           | -1505.259322           |
| 6-31g*                | -1354.288965       | -1504.634669           | -1505.210204           |

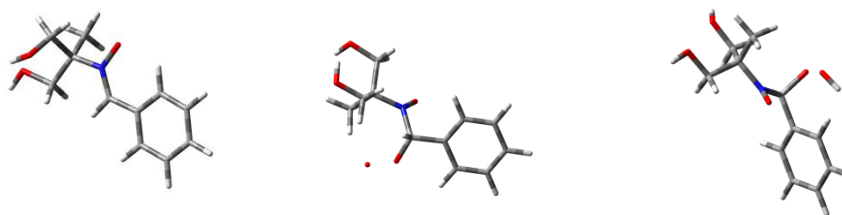

| Compound              | PBN-di-CH2OH<br>PBN-alpha-<br>2CH2OH.com.log | PBN-di-CH2OH-O2<br>PBN-alpha-2CH2OH-<br>O2.com.log | PBN-di-CH2OH-HO2<br>PBN-alpha-2CH2OH-<br>OOH.com.log |
|-----------------------|----------------------------------------------|----------------------------------------------------|------------------------------------------------------|
| file                  |                                              |                                                    |                                                      |
| E 6-31+g**/PCM        | -708.611121                                  | -859.061083                                        | -859.551853                                          |
| E 6-31g*              | -708.5315278                                 | -858.886611                                        | -859.4527103                                         |
| ZPE (raw)             | 0.251127                                     | 0.256083                                           | 0.267567                                             |
| Therm Corr to H (raw) | 0.266624                                     | 0.273512                                           | 0.286767                                             |
| Therm Corr to G (raw) | 0.209386                                     | 0.211155                                           | 0.219872                                             |
| H (raw)               |                                              |                                                    |                                                      |
| G (raw)               |                                              |                                                    |                                                      |
| ZPE (scaled)          | 0.246255                                     | 0.251115                                           | 0.262376                                             |
| Electronic State      | 1-A                                          | 2-A                                                | 2-A                                                  |
| s2 6-31g*             | 0                                            | 0.754600                                           | 0.7545                                               |
| Symmetry              | -                                            | -                                                  | -                                                    |
| N Imag                | 0.000000                                     | 0.000000                                           | 0.000000                                             |
| Rotational Con. (GHz) | 1.3489827                                    | 0.924519                                           | 0.876313                                             |
| Rotational Con. (GHz) | 0.2900041                                    | 0.271811                                           | 0.2651455                                            |
| Rotational Con. (GHz) | 0.2726558                                    | 0.241446                                           | 0.2448042                                            |
| H298                  |                                              |                                                    |                                                      |
| 6-31+g* */PCM         | -708.349369                                  | -858.792539                                        | -859.270277                                          |
| 6-31g*                | -708.269776                                  | -858.618067                                        | -859.171134                                          |
| G298                  |                                              |                                                    |                                                      |
| 6-31+g* */PCM         | -708.406607                                  | -858.854896                                        | -859.337172                                          |
| 6-31g*                | -708.327014                                  | -858.680424                                        | -859.238029                                          |

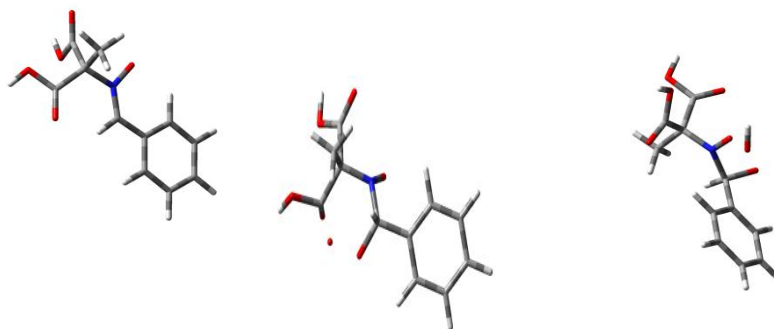

| Compound              | PBN-di-COOH             | PBN-di-COOH-O2             | PBN-di-COOH-HO2             |
|-----------------------|-------------------------|----------------------------|-----------------------------|
| file                  | PBN-alpha-2COOH.com.log | PBN-alpha-2COOH-O2.com.log | PBN-alpha-2COOH-HO2.com.log |
| E 6-31+g**/PCM        | -856.694574             | -1007.156529               | -1007.643925                |
| E 6-31g*              | -856.6111154            | -1006.972471               | -1007.547501                |
| ZPE (raw)             | 0.213215                | 0.218513                   | 0.232354                    |
| Therm Corr to H (raw) | 0.229731                | 0.236561                   | 0.251264                    |
| Therm Corr to G (raw) | 0.168986                | 0.172601                   | 0.184232                    |
| H (raw)               |                         |                            |                             |
| G (raw)               |                         |                            |                             |
| ZPE (scaled)          | 0.209079                | 0.214274                   | 0.227846                    |
| Electronic State      | 1-A                     | 2-A                        | 2-A                         |
| s2 6-31g*             | 0                       | 0.7543                     | 0.7536                      |
| Symmetry              | -                       | -                          | -                           |
| N Imag                | 0.000000                | 0.000000                   | 0.000000                    |
| Rotational Con. (GHz) | 1.0064268               | 0.7877657                  | 0.68492                     |
| Rotational Con. (GHz) | 0.2651683               | 0.2584018                  | 0.26973                     |
| Rotational Con. (GHz) | 0.2340059               | 0.2211802                  | 0.21681                     |
| H298                  |                         |                            |                             |
| 6-31+g* */PCM         | -856.468979             | -1006.924207               | -1007.397169                |
| 6-31g*                | -856.385521             | -1006.740149               | -1007.300745                |
| G298                  |                         |                            |                             |
| 6-31+g* */PCM         | -856.529724             | -1006.988167               | -1007.464201                |
| 6-31g*                | -856.446266             | -1006.804109               | -1007.367777                |

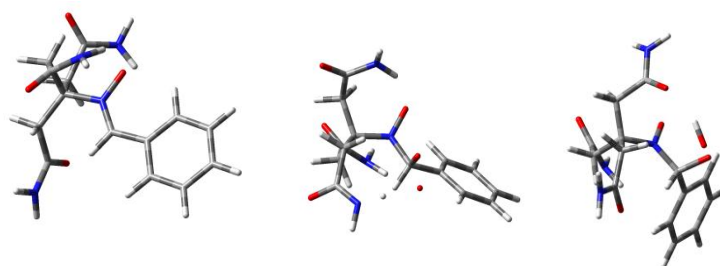

| Compound              | PBN-tri-CH2CONH2<br>PBN-CH2CONH2-<br>3.com.log | PBN-tri-CH2CONH2-O2<br>PBN-CH2CONH2-3-<br>O2b.com.log | PBN-tri-CH2CONH2-HO2<br>PBN-CH2CONH2-3-<br>OOH.com.log |
|-----------------------|------------------------------------------------|-------------------------------------------------------|--------------------------------------------------------|
| file                  |                                                |                                                       |                                                        |
| E 6-31+g**            | -1064.324784                                   | -1214.784888                                          | -1215.276253                                           |
| E 6-31g*              | -1064.214637                                   | -1214.593805                                          | -1215.155638                                           |
| ZPE (raw)             | 0.324297                                       | 0.328585                                              | 0.342739                                               |
| Therm Corr to H (raw) | 0.34665                                        | 0.352547                                              | 0.367744                                               |
| Therm Corr to G (raw) | 0.272461                                       | 0.274518                                              | 0.287817                                               |
| H (raw)               |                                                |                                                       |                                                        |
| G (raw)               |                                                |                                                       |                                                        |
| ZPE (scaled)          | 0.318006                                       | 0.322210                                              | 0.336090                                               |
| Electronic State      | 1-A                                            | 2-A                                                   | 2-A                                                    |
| s2 6-31g*             | 0.000000                                       | 0.7548                                                | 0.7544                                                 |
| Symmetry              | -                                              | -                                                     | -                                                      |
| N Imag                | 0.000000                                       | 0.000000                                              | #NAME?                                                 |
| Rotational Con. (GHz) | 0.339141                                       | 0.3099314                                             | 0.2947006                                              |
| Rotational Con. (GHz) | 0.2067062                                      | 0.1847968                                             | 0.1993875                                              |
| Rotational Con. (GHz) | 0.1894014                                      | 0.1655711                                             | 0.1917742                                              |
| H298                  |                                                |                                                       |                                                        |
| 6-31+g* *             | -1063.984425                                   | -1214.438716                                          | -1214.915158                                           |
| 6-31g*                | -1063.874278                                   | -1214.247633                                          | -1214.794543                                           |
| G298                  |                                                |                                                       |                                                        |
| 6-31+g* *             | -1064.058614                                   | -1214.516745                                          | -1214.995085                                           |
| 6-31g*                | -1063.948467                                   | -1214.325662                                          | -1214.874470                                           |

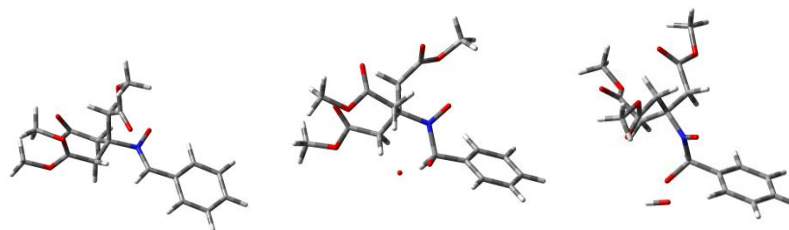

| Compound              | PBN-tri-CH2COOMe<br>PBN-CH2COOMe-<br>3.com.log | PBN-tri-CH2COOMe-O2<br>PBN-CH2COOMe-3-<br>O2.com.log | PBN-tri-CH2COOMe-HO2<br>PBN-CH2COOMe-3-<br>OOH.com.log |
|-----------------------|------------------------------------------------|------------------------------------------------------|--------------------------------------------------------|
| file                  |                                                |                                                      |                                                        |
| E 6-31+g**            | -1241.800941                                   | -1392.254639                                         | -1392.746621                                           |
| E 6-31g*              | -1241.73338                                    | -1392.088369                                         | -1392.656873                                           |
| ZPE (raw)             | 0.371309                                       | 0.375073                                             | 0.388394                                               |
| Therm Corr to H (raw) | 0.397877                                       | 0.403755                                             | 0.41849                                                |
| Therm Corr to G (raw) | 0.312873                                       | 0.313609                                             | 0.323138                                               |
| H (raw)               |                                                |                                                      |                                                        |
| G (raw)               |                                                |                                                      |                                                        |
| ZPE (scaled)          | 0.364106                                       | 0.367797                                             | 0.380859                                               |
| Electronic State      | 1-A                                            | 2-A                                                  | 2-A                                                    |
| s2 6-31g*             | 0                                              | 0.7545                                               | 0.7546                                                 |
| Symmetry              | -                                              | -                                                    | -                                                      |
| N Imag                | 0.000000                                       | 0                                                    | 0.000000                                               |
| Rotational Con. (GHz) | 0.2919382                                      | 0.2575671                                            | 0.2299062                                              |
| Rotational Con. (GHz) | 0.1322421                                      | 0.1301576                                            | 0.1345448                                              |
| Rotational Con. (GHz) | 0.1132622                                      | 0.1108923                                            | 0.1088917                                              |
| H298                  |                                                |                                                      |                                                        |
| 6-31+g* *             | -1241.410267                                   | -1391.858160                                         | -1392.335666                                           |
| 6-31g*                | -1241.342706                                   | -1391.691890                                         | -1392.245918                                           |
| G298                  |                                                |                                                      |                                                        |
| 6-31+g* *             | -1241.495271                                   | -1391.948306                                         | -1392.431018                                           |
| 6-31g*                | -1241.427710                                   | -1391.782036                                         | -1392.341270                                           |



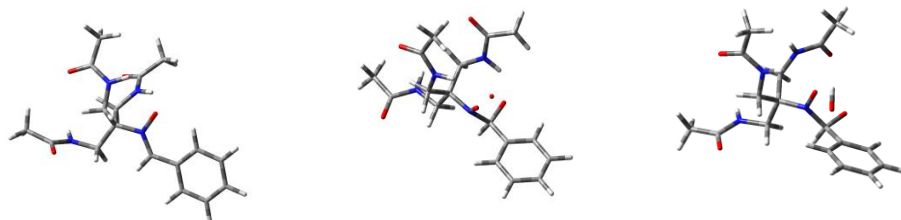

| Compound              | PBN-tri-CH2NHCOMe<br>PBN-CH2NHCOMe-<br>3.com.log | PBN-tri-CH2NHCOMe-O2<br>PBN-CH2NHCOMe-3-<br>O2.com.log | PBN-tri-CH2NHCOMe-HO2<br>PBN-CH2NHCOMe-3-<br>OOH.com.log |
|-----------------------|--------------------------------------------------|--------------------------------------------------------|----------------------------------------------------------|
| file                  |                                                  |                                                        |                                                          |
| E 6-31+g**            | -1182.24663                                      | -1332.706915                                           | -1333.195653                                             |
| E 6-31g*              | -1182.152723                                     | -1332.527535                                           | -1333.095406                                             |
| ZPE (raw)             | 0.408242                                         | 0.413662                                               | 0.427347                                                 |
| Therm Corr to H (raw) | 0.435609                                         | 0.443031                                               | 0.457101                                                 |
| Therm Corr to G (raw) | 0.347602                                         | 0.351371                                               | 0.363326                                                 |
| H (raw)               |                                                  |                                                        |                                                          |
| G (raw)               |                                                  |                                                        |                                                          |
| ZPE (scaled)          | 0.400322                                         | 0.405637                                               | 0.419056                                                 |
| Electronic State      | 1-A                                              | 2-A                                                    | 2-A                                                      |
| s2 6-31g*             | 0                                                | 0.754600                                               | 0.754300                                                 |
| Symmetry              | -                                                | -                                                      | -                                                        |
| N Imag                | 0                                                | 0.000000                                               | 0.000000                                                 |
| Rotational Con. (GHz) | 0.268081                                         | 0.231383                                               | 0.208623                                                 |
| Rotational Con. (GHz) | 0.1386845                                        | 0.134750                                               | 0.136669                                                 |
| Rotational Con. (GHz) | 0.1102925                                        | 0.110900                                               | 0.118847                                                 |
| H298                  |                                                  |                                                        |                                                          |
| 6-31+g* *             | -1181.818941                                     | -1332.271909                                           | -1332.746843                                             |
| 6-31g*                | -1181.725034                                     | -1332.092529                                           | -1332.646595                                             |
| G298                  |                                                  |                                                        |                                                          |
| 6-31+g* *             | -1181.906948                                     | -1332.363569                                           | -1332.840618                                             |
| 6-31g*                | -1181.813041                                     | -1332.184189                                           | -1332.740370                                             |

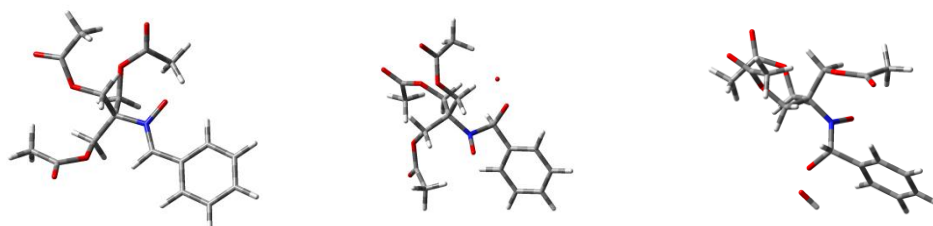

| Compound                     | PBN-tri-CH2OCOME<br>PBN-CH2OCOCH3-<br>3b.com.log | PBN-tri-CH2OCOME-O2<br>PBN-CH2OCOME-3-<br>O2b.com.log | PBN-tri-CH2OCOME-HO2<br>PBN-CH2OCOME-3-<br>OOH.com.log |
|------------------------------|--------------------------------------------------|-------------------------------------------------------|--------------------------------------------------------|
| file                         |                                                  |                                                       |                                                        |
| <b>E 6-31+g**/PCM</b>        | -1241.789464                                     | -1392.254591                                          | -1392.733536                                           |
| <b>E 6-31g*</b>              | -1241.715654                                     | -1392.094634                                          | -1392.643461                                           |
| <b>ZPE (raw)</b>             | 0.37035                                          | 0.375653                                              | 0.387989                                               |
| <b>Therm Corr to H (raw)</b> | 0.396479                                         | 0.403858                                              | 0.417369                                               |
| <b>Therm Corr to G (raw)</b> | 0.312863                                         | 0.315576                                              | 0.324624                                               |
| <b>H (raw)</b>               |                                                  |                                                       |                                                        |
| <b>G (raw)</b>               |                                                  |                                                       |                                                        |
| <b>ZPE (scaled)</b>          | 0.363165                                         | 0.368365                                              | 0.380462                                               |
| <b>Electronic State</b>      | 1-A                                              | 2-A                                                   | 2-A                                                    |
| <b>s2 6-31g*</b>             | 0                                                | 0.7545                                                | 0.7544                                                 |
| <b>Symmetry</b>              | -                                                | -                                                     | -                                                      |
| <b>N Imag</b>                | 0.000000                                         | 0.000000                                              | 0.000000                                               |
| <b>Rotational Con. (GHz)</b> | 0.2616267                                        | 0.25723                                               | 0.2924838                                              |
| <b>Rotational Con. (GHz)</b> | 0.1553378                                        | 0.1390775                                             | 0.1214266                                              |
| <b>Rotational Con. (GHz)</b> | 0.1085382                                        | 0.111247                                              | 0.1123227                                              |
| <b>H298</b>                  |                                                  |                                                       |                                                        |
| <b>6-31+g* */PCM</b>         | -1241.400170                                     | -1391.858021                                          | -1392.323694                                           |
| <b>6-31g*</b>                | -1241.326360                                     | -1391.698063                                          | -1392.233619                                           |
| <b>G298</b>                  |                                                  |                                                       |                                                        |
| <b>6-31+g* */PCM</b>         | -1241.483786                                     | -1391.946303                                          | -1392.416439                                           |
| <b>6-31g*</b>                | -1241.409976                                     | -1391.786345                                          | -1392.326364                                           |

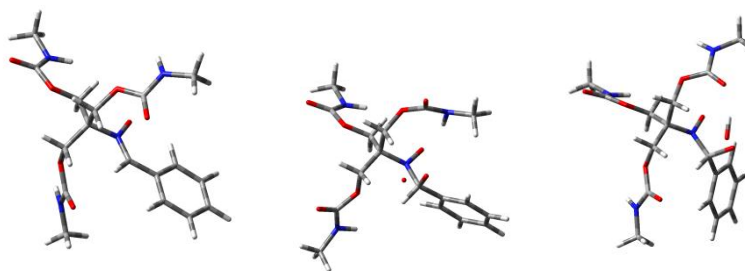

| Compound              | PBN-tri-CH2OCONHMe-O2<br>PBN-CH2OCONHMe-3-<br>O2.com.log | PBN-tri-CH2OCONHMe<br>PBN-CH2OCONHMe-<br>3.com.log | PBN-tri-CH2OCONHMe-HO2<br>PBN-CH2OCONHMe-3-<br>OOHb.com.log |
|-----------------------|----------------------------------------------------------|----------------------------------------------------|-------------------------------------------------------------|
| file                  |                                                          |                                                    |                                                             |
| E 6-31+g**/PCM        | -1558.367725                                             | -1407.91669                                        | -1558.869458                                                |
| E 6-31g*              | -1558.1761                                               | -1407.815444                                       | -1558.759114                                                |
| ZPE (raw)             | 0.427436                                                 | 0.422678                                           | 0.442566                                                    |
| Therm Corr to H (raw) | 0.460381                                                 | 0.453856                                           | 0.475742                                                    |
| Therm Corr to G (raw) | 0.358674                                                 | 0.353693                                           | 0.373567                                                    |
| H (raw)               |                                                          |                                                    |                                                             |
| G (raw)               |                                                          |                                                    |                                                             |
| ZPE (scaled)          | 0.419144                                                 | 0.414478                                           | 0.433980                                                    |
| Electronic State      | 2-A                                                      | 1-A                                                | 2-A                                                         |
| s2 6-31g*             | 0.7547                                                   | 0                                                  | 0.7544                                                      |
| Symmetry              | -                                                        | -                                                  | -                                                           |
| N Imag                | 0                                                        | 0                                                  | 0.000000                                                    |
| Rotational Con. (GHz) | 0.1611345                                                | 0.188153                                           | 0.1556891                                                   |
| Rotational Con. (GHz) | 0.1187581                                                | 0.1284995                                          | 0.1264121                                                   |
| Rotational Con. (GHz) | 0.0893827                                                | 0.0908211                                          | 0.0904877                                                   |
| H298                  |                                                          |                                                    |                                                             |
| 6-31+g* */PCM         | -1557.915636                                             | -1407.471034                                       | -1558.402302                                                |
| 6-31g*                | -1557.724011                                             | -1407.369788                                       | -1558.291958                                                |
| G298                  |                                                          |                                                    |                                                             |
| 6-31+g* */PCM         | -1558.017343                                             | -1407.571197                                       | -1558.504477                                                |
| 6-31g*                | -1557.825718                                             | -1407.469951                                       | -1558.394133                                                |

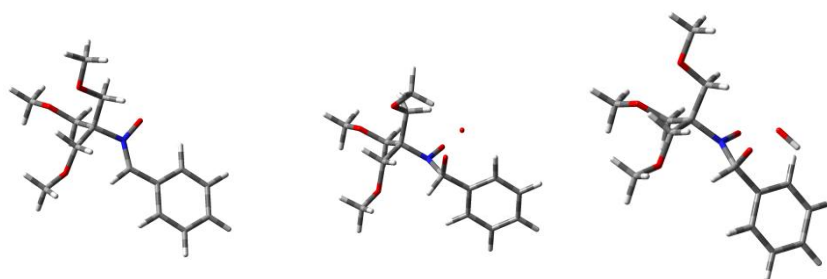

| Compound              | PBN-tri-CH2OMe<br>PBN-CH2OMe-<br>3.com.log | PBN-tri-CH2OMe-O2<br>PBN-CH2OMe-3-<br>O2.com.log | PBN-tri-CH2OMe-HO2<br>PBN-CH2OMe-3-<br>OOH.com.log |
|-----------------------|--------------------------------------------|--------------------------------------------------|----------------------------------------------------|
| file                  |                                            |                                                  |                                                    |
| E 6-31+g**/PCM        | -901.708178                                | -1052.15826                                      | -1052.655032                                       |
| E 6-31g*              | -901.6593643                               | -1052.008405                                     | -1052.590292                                       |
| ZPE (raw)             | 0.340497                                   | 0.345335                                         | 0.358538                                           |
| Therm Corr to H (raw) | 0.361803                                   | 0.368566                                         | 0.382781                                           |
| Therm Corr to G (raw) | 0.289836                                   | 0.292387                                         | 0.303451                                           |
| H (raw)               |                                            |                                                  |                                                    |
| G (raw)               |                                            |                                                  |                                                    |
| ZPE (scaled)          | 0.333891                                   | 0.338636                                         | 0.351582                                           |
| Electronic State      | 1-A                                        | 2-A                                              | 2-A                                                |
| s2 6-31g*             | 0                                          | 0.7548                                           | 0.7546                                             |
| Symmetry              | -                                          | -                                                | -                                                  |
| N Imag                | 0.000000                                   | 0.000000                                         | 0.000000                                           |
| Rotational Con. (GHz) | 0.5877978                                  | 0.4572142                                        | 0.4770708                                          |
| Rotational Con. (GHz) | 0.1928172                                  | 0.201493                                         | 0.1849479                                          |
| Rotational Con. (GHz) | 0.176976                                   | 0.1782263                                        | 0.1690251                                          |
| H298                  |                                            |                                                  |                                                    |
| 6-31+g* */PCM         | -901.352981                                | -1051.796393                                     | -1052.279207                                       |
| 6-31g*                | -901.304167                                | -1051.646538                                     | -1052.214466                                       |
| G298                  |                                            |                                                  |                                                    |
| 6-31+g* */PCM         | -901.424948                                | -1051.872572                                     | -1052.358537                                       |
| 6-31g*                | -901.376134                                | -1051.722717                                     | -1052.293796                                       |

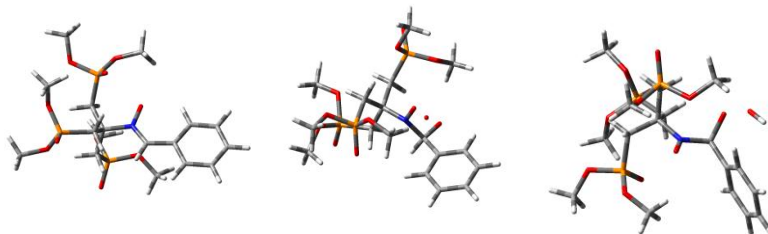

| Compound                     | PBN-tri-CH <sub>2</sub> POOMe <sub>2</sub><br>PBN-CH <sub>2</sub> POOMe <sub>2</sub> -<br>3c.com.log | PBN-tri-CH <sub>2</sub> POOMe <sub>2</sub> -O <sub>2</sub><br>PBN-CH <sub>2</sub> POOMe <sub>2</sub> -3-<br>O2.com.log | PBN-tri-CH <sub>2</sub> POOMe <sub>2</sub> -HO <sub>2</sub><br>PBN-CH <sub>2</sub> POOMe <sub>2</sub> -3-<br>OOH.com.log |
|------------------------------|------------------------------------------------------------------------------------------------------|------------------------------------------------------------------------------------------------------------------------|--------------------------------------------------------------------------------------------------------------------------|
| file                         |                                                                                                      |                                                                                                                        |                                                                                                                          |
| <b>E 6-31+g**/PCM</b>        | -2497.105572                                                                                         | -2647.565319                                                                                                           | -2648.050611                                                                                                             |
| <b>E 6-31g*</b>              | -2497.017706                                                                                         | -2647.391982                                                                                                           | -2647.949827                                                                                                             |
| <b>ZPE (raw)</b>             | 0.488747                                                                                             | 0.494118                                                                                                               | 0.506811                                                                                                                 |
| <b>Therm Corr to H (raw)</b> | 0.526893                                                                                             | 0.533882                                                                                                               | 0.547995                                                                                                                 |
| <b>Therm Corr to G (raw)</b> | 0.415154                                                                                             | 0.419679                                                                                                               | 0.429014                                                                                                                 |
| <b>H (raw)</b>               |                                                                                                      |                                                                                                                        |                                                                                                                          |
| <b>G (raw)</b>               |                                                                                                      |                                                                                                                        |                                                                                                                          |
| <b>ZPE (scaled)</b>          | 0.479265                                                                                             | 0.484532                                                                                                               | 0.496979                                                                                                                 |
| <b>Electronic State</b>      | 1-A                                                                                                  | 2-A                                                                                                                    | 2-A                                                                                                                      |
| <b>s2 6-31g*</b>             | 0                                                                                                    | 0.7546                                                                                                                 | 0.7544                                                                                                                   |
| <b>Symmetry</b>              | -                                                                                                    | -                                                                                                                      | -                                                                                                                        |
| <b>N Imag</b>                | 0.000000                                                                                             | 0.000000                                                                                                               | 0.000000                                                                                                                 |
| <b>Rotational Con. (GHz)</b> | 0.1423591                                                                                            | 0.1230166                                                                                                              | 0.1248274                                                                                                                |
| <b>Rotational Con. (GHz)</b> | 0.0936729                                                                                            | 0.1018884                                                                                                              | 0.0970933                                                                                                                |
| <b>Rotational Con. (GHz)</b> | 0.0861287                                                                                            | 0.0827501                                                                                                              | 0.081644                                                                                                                 |
| <b>H298</b>                  |                                                                                                      |                                                                                                                        |                                                                                                                          |
| <b>6-31+g* */PCM</b>         | -2496.588161                                                                                         | -2647.041023                                                                                                           | -2647.512448                                                                                                             |
| <b>6-31g*</b>                | -2496.500294                                                                                         | -2646.867686                                                                                                           | -2647.411664                                                                                                             |
| <b>G298</b>                  |                                                                                                      |                                                                                                                        |                                                                                                                          |
| <b>6-31+g* */PCM</b>         | -2496.699900                                                                                         | -2647.155226                                                                                                           | -2647.631429                                                                                                             |
| <b>6-31g*</b>                | -2496.612033                                                                                         | -2646.981889                                                                                                           | -2647.530645                                                                                                             |

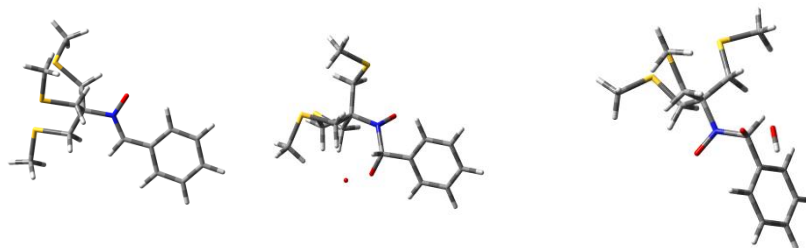

| Compound              | PBN-tri-CH2SMe<br>PBN-CH2SMe-<br>3.com.log | PBN-tri-CH2SMe-O2<br>PBN-CH2SMe-3-<br>O2.com.log | PBN-tri-CH2SMe-HO2<br>PBN-CH2SMe-3-<br>OOH.com.log |
|-----------------------|--------------------------------------------|--------------------------------------------------|----------------------------------------------------|
| file                  |                                            |                                                  |                                                    |
| E 6-31+g**/PCM        | -1870.638803                               | -2021.105525                                     | -2021.586192                                       |
| E 6-31g*              | -1870.589507                               | -2020.964175                                     | -2021.522266                                       |
| ZPE (raw)             | 0.328624                                   | 0.333597                                         | 0.346639                                           |
| Therm Corr to H (raw) | 0.351854                                   | 0.359135                                         | 0.372788                                           |
| Therm Corr to G (raw) | 0.274677                                   | 0.275756                                         | 0.288079                                           |
| H (raw)               |                                            |                                                  |                                                    |
| G (raw)               |                                            |                                                  |                                                    |
| ZPE (scaled)          | 0.322249                                   | 0.327125                                         | 0.339914                                           |
| Electronic State      | 1-A                                        | 2-A                                              | 2-A                                                |
| s2 6-31g*             |                                            | 0                                                | 0.7547                                             |
| Symmetry              | -                                          | -                                                | -                                                  |
| N Imag                | 0.000000                                   | 0.000000                                         | 0.000000                                           |
| Rotational Con. (GHz) | 0.4112537                                  | 0.3335447                                        | 0.3478744                                          |
| Rotational Con. (GHz) | 0.1466717                                  | 0.1589735                                        | 0.1366444                                          |
| Rotational Con. (GHz) | 0.1340243                                  | 0.1373842                                        | 0.1338158                                          |
| H298                  |                                            |                                                  |                                                    |
| 6-31+g* */PCM         | -1870.293324                               | -2020.752862                                     | -2021.220129                                       |
| 6-31g*                | -1870.244028                               | -2020.611512                                     | -2021.156203                                       |
| G298                  |                                            |                                                  |                                                    |
| 6-31+g* */PCM         | -1870.370501                               | -2020.836241                                     | -2021.304838                                       |
| 6-31g*                | -1870.321205                               | -2020.694891                                     | -2021.240912                                       |

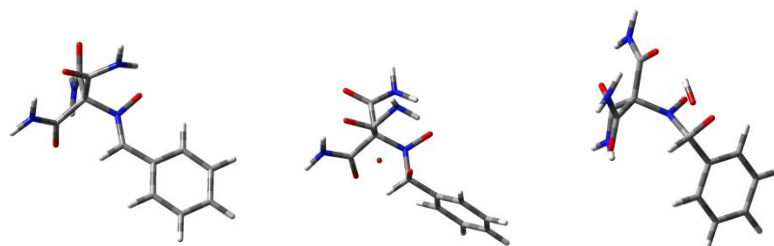

| Compound              | PBN-tri-CONH2       | PBN-tri-CONH2-O2    | PBN-tri-CONH2-HO2        |
|-----------------------|---------------------|---------------------|--------------------------|
| file                  | PBN-CONH2-3.com.log | PBN-TriCONH2-O2.out | PBN-CONH2-3-OOHb.com.log |
| E 6-31+g**/PCM        | -946.364505         | -1096.827295        | -1097.309626             |
| E 6-31g*              | -946.2722994        | -1096.646338        | -1097.209627             |
| ZPE (raw)             | 0.236977            | 0.24289             | 0.25656                  |
| Therm Corr to H (raw) | 0.255346            | 0.262507            | 0.277183                 |
| Therm Corr to G (raw) | 0.191126            | 0.195454            | 0.206813                 |
| H (raw)               |                     |                     |                          |
| G (raw)               |                     |                     |                          |
| ZPE (scaled)          | 0.232380            | 0.238178            | 0.251583                 |
| Electronic State      | 1-A                 | 2-A                 | 2-A                      |
| s2 6-31g*             | 0                   | 0.7545              | 0.7545                   |
| Symmetry              | -                   | C1                  | -                        |
| N Imag                | 0.000000            | 0.000000            | 0.000000                 |
| Rotational Con. (GHz) | 0.7070268           | 0.6217353           | 0.5176907                |
| Rotational Con. (GHz) | 0.2310339           | 0.2230012           | 0.232764                 |
| Rotational Con. (GHz) | 0.2200747           | 0.2122883           | 0.2163053                |
| H298                  |                     |                     |                          |
| 6-31+g* */PCM         | -946.113756         | -1096.569500        | -1097.037420             |
| 6-31g*                | -946.021551         | -1096.388543        | -1096.937421             |
| G298                  |                     |                     |                          |
| 6-31+g* */PCM         | -946.177976         | -1096.636553        | -1097.107790             |
| 6-31g*                | -946.085771         | -1096.455596        | -1097.007791             |

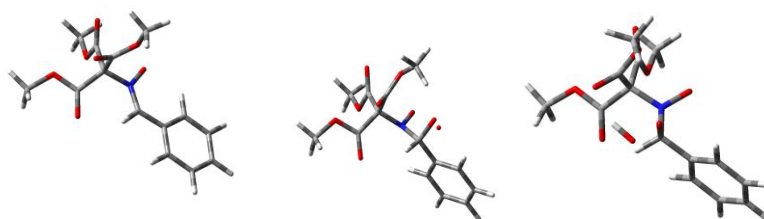

| Compound              | PBN-tri-COOMe       | PBN-tri-COOMe-O2       | PBN-tri-COOMe-HO2       |
|-----------------------|---------------------|------------------------|-------------------------|
| file                  | PBN-COOMe-3.com.log | PBN-COOMe-3-O2.com.log | PBN-COOMe-3-OOH.com.log |
| E 6-31+g**/PCM        | -1123.821814        | -1274.278852           | -1274.767454            |
| E 6-31g*              | -1123.770079        | -1274.122424           | -1274.707691            |
| ZPE (raw)             | 0.283755            | 0.288064               | 0.302583                |
| Therm Corr to H (raw) | 0.307035            | 0.313383               | 0.328293                |
| Therm Corr to G (raw) | 0.229849            | 0.232238               | 0.245462                |
| H (raw)               |                     |                        |                         |
| G (raw)               |                     |                        |                         |
| ZPE (scaled)          | 0.278250            | 0.282476               | 0.296713                |
| Electronic State      | 1-A                 | 2-A                    | 2-A                     |
| s2 6-31g*             | 0                   | 0.7559                 | 0.754400                |
| Symmetry              | -                   | -                      | -                       |
| N Imag                | 0.000000            | 0.000000               | 0.000000                |
| Rotational Con. (GHz) | 0.4209902           | 0.347073               | 0.340736                |
| Rotational Con. (GHz) | 0.1787248           | 0.1877508              | 0.186207                |
| Rotational Con. (GHz) | 0.1776332           | 0.1631597              | 0.165864                |
| H298                  |                     |                        |                         |
| 6-31+g* */PCM         | -1123.520284        | -1273.971057           | -1274.445031            |
| 6-31g*                | -1123.468549        | -1273.814630           | -1274.385269            |
| G298                  |                     |                        |                         |
| 6-31+g* */PCM         | -1123.597470        | -1274.052202           | -1274.527862            |
| 6-31g*                | -1123.545735        | -1273.895775           | -1274.468100            |



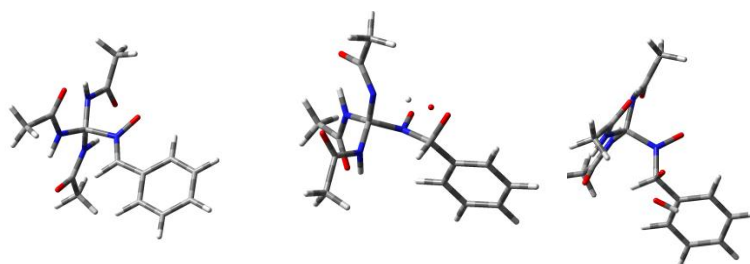

| Compound                     | PBN-tri-NHCOMe<br>PBN-NHCOMe-<br>3.com.log | PBN-tri-NHCOMe-O2<br>PBN-NHCOMe-3-<br>O2.com.log | PBN-tri-NHCOMe-HO2<br>PBN-NHCOMe-3-<br>OOH.com.log |
|------------------------------|--------------------------------------------|--------------------------------------------------|----------------------------------------------------|
| file                         |                                            |                                                  |                                                    |
| <b>E 6-31+g**/PCM</b>        | -1064.288306                               | -1214.760238                                     | -1215.235847                                       |
| <b>E 6-31g*</b>              | -1064.224148                               | -1214.609935                                     | -1215.156202                                       |
| <b>ZPE (raw)</b>             | 0.320552                                   | 0.324818                                         | 0.338615                                           |
| <b>Therm Corr to H (raw)</b> | 0.343786                                   | 0.350189                                         | 0.364813                                           |
| <b>Therm Corr to G (raw)</b> | 0.266471                                   | 0.267285                                         | 0.280013                                           |
| <b>H (raw)</b>               |                                            |                                                  |                                                    |
| <b>G (raw)</b>               |                                            |                                                  |                                                    |
| <b>ZPE (scaled)</b>          | 0.314333                                   | 0.318517                                         | 0.332046                                           |
| <b>Electronic State</b>      | 1-A                                        | 2-A                                              | 2-A                                                |
| <b>s2 6-31g*</b>             | 0                                          | 0.7542                                           | 0.7546                                             |
| <b>Symmetry</b>              | -                                          | -                                                | -                                                  |
| <b>N Imag</b>                | 0.000000                                   | 0.000000                                         | 0.000000                                           |
| <b>Rotational Con. (GHz)</b> | 0.3434093                                  | 0.3306594                                        | 0.2978961                                          |
| <b>Rotational Con. (GHz)</b> | 0.1901124                                  | 0.1763069                                        | 0.1883656                                          |
| <b>Rotational Con. (GHz)</b> | 0.1827485                                  | 0.1576798                                        | 0.1743604                                          |
| <b>H298</b>                  |                                            |                                                  |                                                    |
| <b>6-31+g* */PCM</b>         | -1063.950739                               | -1214.416350                                     | -1214.877603                                       |
| <b>6-31g*</b>                | -1063.886580                               | -1214.266047                                     | -1214.797958                                       |
| <b>G298</b>                  |                                            |                                                  |                                                    |
| <b>6-31+g* */PCM</b>         | -1064.028054                               | -1214.499254                                     | -1214.962403                                       |
| <b>6-31g*</b>                | -1063.963895                               | -1214.348951                                     | -1214.882758                                       |

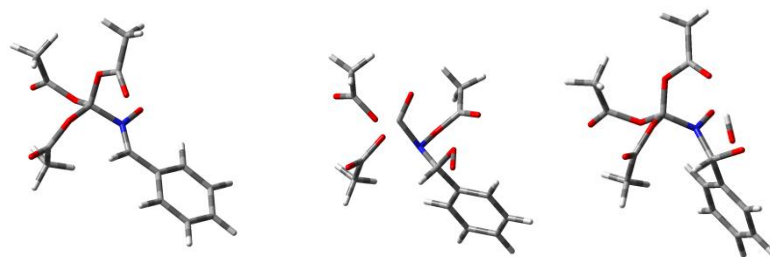

| Compound              | PBN-tri-OCOMe       | PBN-tri-OCOMe-O2       | PBN-tri-OCOMe-HO2       |
|-----------------------|---------------------|------------------------|-------------------------|
| file                  | PBN-OCOMe-3.com.log | PBN-OCOMe-3-O2.com.log | PBN-OCOMe-3-OOH.com.log |
| E 6-31+g**/PCM        | -1123.839554        | N/A                    | -1274.786072            |
| E 6-31g*              | -1123.779678        |                        | -1274.718803            |
| ZPE (raw)             | 0.280854            |                        | 0.299905                |
| Therm Corr to H (raw) | 0.303676            |                        | 0.32517                 |
| Therm Corr to G (raw) | 0.227462            |                        | 0.243235                |
| H (raw)               |                     |                        |                         |
| G (raw)               |                     |                        |                         |
| ZPE (scaled)          | 0.275405            |                        | 0.294087                |
| Electronic State      | 1-A                 |                        | 2-A                     |
| s2 6-31g*             | 0                   |                        | 0.7539                  |
| Symmetry              | -                   |                        | -                       |
| N Imag                | 0.000000            |                        | 0.000000                |
| Rotational Con. (GHz) | 0.4350747           |                        | 0.3311801               |
| Rotational Con. (GHz) | 0.1864728           |                        | 0.1916365               |
| Rotational Con. (GHz) | 0.1694322           |                        | 0.1665542               |
| H298                  |                     |                        |                         |
| 6-31+g* */PCM         | -1123.541327        |                        | -1274.466720            |
| 6-31g*                | -1123.481451        |                        | -1274.399451            |
| G298                  |                     |                        |                         |
| 6-31+g* */PCM         | -1123.617541        |                        | -1274.548655            |
| 6-31g*                | -1123.557665        |                        | -1274.481386            |

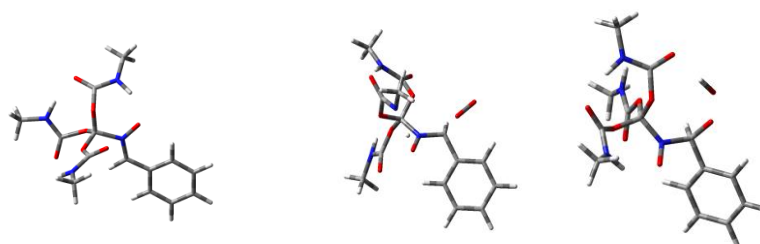

| Compound              | PBN-tri-OCONHMe<br>PBN-OCONHMe-<br>3.com.log | PBN-tri-OCONHMe-O2<br>PBN-OCONHMe-3-<br>O2.com.log | PBN-tri-OCONHMe-HO2<br>PBN-OCONHMe-3-<br>OOH.com.log |
|-----------------------|----------------------------------------------|----------------------------------------------------|------------------------------------------------------|
| file                  |                                              |                                                    |                                                      |
| E 6-31+g**/PCM        | -1289.960478                                 | -1440.409276                                       | -1440.90837                                          |
| E 6-31g*              | -1289.886852                                 | -1440.252909                                       | -1440.82715                                          |
| ZPE (raw)             | 0.334579                                     | 0.337828                                           | 0.353797                                             |
| Therm Corr to H (raw) | 0.361325                                     | 0.366791                                           | 0.382922                                             |
| Therm Corr to G (raw) | 0.274405                                     | 0.274843                                           | 0.290497                                             |
| H (raw)               |                                              |                                                    |                                                      |
| G (raw)               |                                              |                                                    |                                                      |
| ZPE (scaled)          | 0.328088                                     | 0.331274                                           | 0.346933                                             |
| Electronic State      | 1-A                                          | 2-A                                                | 2-A                                                  |
| s2 6-31g*             | 0                                            | 0.7545                                             | 0.7543                                               |
| Symmetry              | -                                            | -                                                  | -                                                    |
| N Imag                | 0.000000                                     | 0.000000                                           | 0.000000                                             |
| Rotational Con. (GHz) | 0.2626084                                    | 0.2411777                                          | 0.2503055                                            |
| Rotational Con. (GHz) | 0.1520595                                    | 0.1514455                                          | 0.1404939                                            |
| Rotational Con. (GHz) | 0.1337627                                    | 0.1255845                                          | 0.1283657                                            |
| H298                  |                                              |                                                    |                                                      |
| 6-31+g* */PCM         | -1289.605644                                 | -1440.049039                                       | -1440.532312                                         |
| 6-31g*                | -1289.532018                                 | -1439.892671                                       | -1440.451092                                         |
| G298                  |                                              |                                                    |                                                      |
| 6-31+g* */PCM         | -1289.692564                                 | -1440.140987                                       | -1440.624737                                         |
| 6-31g*                | -1289.618938                                 | -1439.984619                                       | -1440.543517                                         |

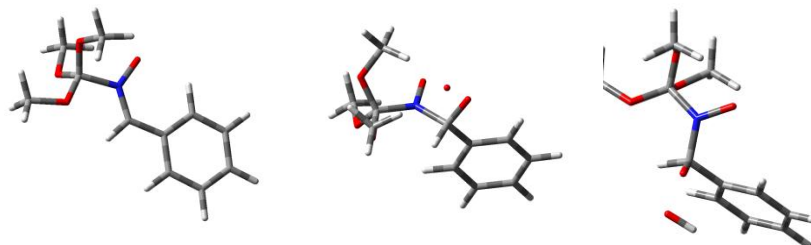

| Compound              | PBN-tri-OMe       | PBN-tri-OMe-O2        | PBN-tri-OMe-HO2       |
|-----------------------|-------------------|-----------------------|-----------------------|
| file                  | PBN-OMe-3.com.log | PBN-OMe-3-O2b.com.log | PBN-OMe-3-OOH.com.log |
| E 6-31+g**/PCM        | -783.792744       | -934.248473           | -934.741688           |
| E 6-31g*              | -783.7535674      | -934.0985653          | -934.6845934          |
| ZPE (raw)             | 0.254201          | 0.25916               | 0.272043              |
| Therm Corr to H (raw) | 0.271409          | 0.278071              | 0.29234               |
| Therm Corr to G (raw) | 0.209551          | 0.212395              | 0.221996              |
| H (raw)               |                   |                       |                       |
| G (raw)               |                   |                       |                       |
| ZPE (scaled)          | 0.249270          | 0.254132              | 0.266765              |
| Electronic State      | 1-A               | 2-A                   | 2-A                   |
| s2 6-31g*             | 0                 | 0.7543                | 0.7543                |
| Symmetry              | -                 | -                     | -                     |
| N Imag                | 0.000000          | 0.000000              | 0.000000              |
| Rotational Con. (GHz) | 1.0904602         | 0.7011249             | 0.6892308             |
| Rotational Con. (GHz) | 0.2814713         | 0.3089054             | 0.2886754             |
| Rotational Con. (GHz) | 0.2639659         | 0.2601099             | 0.2627712             |
| H298                  |                   |                       |                       |
| 6-31+g* */PCM         | -783.526266       | -933.975430           | -934.454626           |
| 6-31g*                | -783.487090       | -933.825522           | -934.397531           |
| G298                  |                   |                       |                       |
| 6-31+g* */PCM         | -783.588124       | -934.041106           | -934.524970           |
| 6-31g*                | -783.548948       | -933.891198           | -934.467875           |

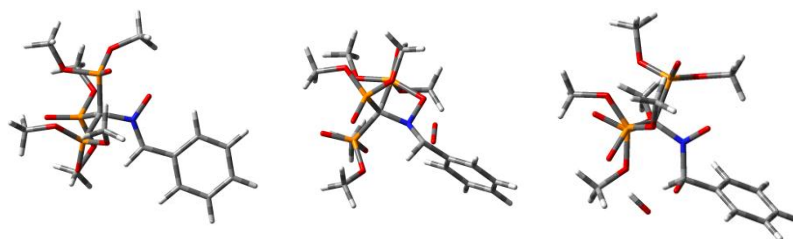

| Compound                     | PBN-tri-POOMe2<br>PBN-POOMe2-<br>3.com.log | PBN-tri-POOMe2-O2<br>PBN-POOMe-3-<br>O2b.com.log | PBN-tri-POOMe2-HO2<br>PBN-POOMe-3-<br>OOHb.com.log |
|------------------------------|--------------------------------------------|--------------------------------------------------|----------------------------------------------------|
| file                         |                                            |                                                  |                                                    |
| <b>E 6-31+g**/PCM</b>        | -2379.12374                                | -2529.569597                                     | -2530.069092                                       |
| <b>E 6-31g*</b>              | -2379.056907                               | -2529.424005                                     | -2529.995128                                       |
| <b>ZPE (raw)</b>             | 0.402407                                   | 0.407154                                         | 0.4213                                             |
| <b>Therm Corr to H (raw)</b> | 0.437065                                   | 0.443518                                         | 0.458389                                           |
| <b>Therm Corr to G (raw)</b> | 0.335846                                   | 0.338718                                         | 0.351014                                           |
| <b>H (raw)</b>               |                                            |                                                  |                                                    |
| <b>G (raw)</b>               |                                            |                                                  |                                                    |
| <b>ZPE (scaled)</b>          | 0.394600                                   | 0.399255                                         | 0.413127                                           |
| <b>Electronic State</b>      | 1-A                                        | 2-A                                              | 2-A                                                |
| <b>s2 6-31g*</b>             | 0                                          | 0.7544                                           | 0.7544                                             |
| <b>Symmetry</b>              | -                                          | -                                                | -                                                  |
| <b>N Imag</b>                | 0.000000                                   | 0.000000                                         | 0.000000                                           |
| <b>Rotational Con. (GHz)</b> | 0.2134556                                  | 0.1891594                                        | 0.1906434                                          |
| <b>Rotational Con. (GHz)</b> | 0.1249908                                  | 0.1264207                                        | 0.1235934                                          |
| <b>Rotational Con. (GHz)</b> | 0.1214607                                  | 0.1165158                                        | 0.1147428                                          |
| <b>H298</b>                  |                                            |                                                  |                                                    |
| <b>6-31+g* */PCM</b>         | -2378.694482                               | -2529.133978                                     | -2529.618876                                       |
| <b>6-31g*</b>                | -2378.627648                               | -2528.988386                                     | -2529.544913                                       |
| <b>G298</b>                  |                                            |                                                  |                                                    |
| <b>6-31+g* */PCM</b>         | -2378.795701                               | -2529.238778                                     | -2529.726251                                       |
| <b>6-31g*</b>                | -2378.728867                               | -2529.093186                                     | -2529.652288                                       |

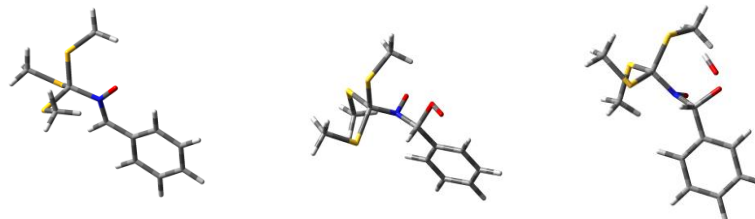

| Compound              | PBN-tri-SMe       | PBN-tri-SMe-O2         | PBN-tri-SMe-HO2       |
|-----------------------|-------------------|------------------------|-----------------------|
| file                  | PBN-SMe-3.com.log | PBN-SMe-3-O2-c.com.log | PBN-SMe-3-OOH.com.log |
| E 6-31+g**/PCM        | -1752.692787      | -1903.146421           | -1903.642013          |
| E 6-31g*              | -1752.659135      | -1903.006628           | -1903.594985          |
| ZPE (raw)             | 0.241711          | 0.245793               | 0.260292              |
| Therm Corr to H (raw) | 0.2612            | 0.267626               | 0.282317              |
| Therm Corr to G (raw) | 0.193847          | 0.194599               | 0.208181              |
| H (raw)               |                   |                        |                       |
| G (raw)               |                   |                        |                       |
| ZPE (scaled)          | 0.237022          | 0.241025               | 0.255242              |
| Electronic State      | 1-A               | 2-A                    | 2-A                   |
| s2 6-31g*             | 0                 | 0.7557                 | 0.7545                |
| Symmetry              | -                 | -                      | -                     |
| N Imag                | 0.000000          | 0.000000               | 0.000000              |
| Rotational Con. (GHz) | 0.6722395         | 0.5002244              | 0.4975158             |
| Rotational Con. (GHz) | 0.2209792         | 0.2288683              | 0.2286281             |
| Rotational Con. (GHz) | 0.2146102         | 0.200808               | 0.2018773             |
| H298                  |                   |                        |                       |
| 6-31+g* */PCM         | -1752.436276      | -1902.883563           | -1903.364746          |
| 6-31g*                | -1752.402624      | -1902.743770           | -1903.317717          |
| G298                  |                   |                        |                       |
| 6-31+g* */PCM         | -1752.503629      | -1902.956590           | -1903.438882          |
| 6-31g*                | -1752.469977      | -1902.816797           | -1903.391853          |

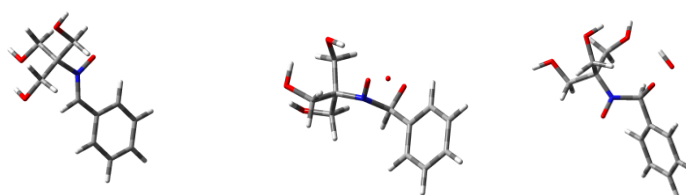

| Compound                     | PBN-tri-CH2OH<br>PBN-alpha-<br>3CH2OH.com.log | PBN-tri-CH2OH-O2<br>PBN-alpha-3CH2OH-<br>O2.com.log | PBN-tri-CH2OH-HO2<br>PBN-alpha-3CH2OH-<br>OOH.com.log |
|------------------------------|-----------------------------------------------|-----------------------------------------------------|-------------------------------------------------------|
| file                         |                                               |                                                     |                                                       |
| <b>E 6-31+g**/PCM</b>        | -783.835028                                   | -934.28536                                          | -934.778065                                           |
| <b>E 6-31g*</b>              | -783.7413479                                  | -934.1068776                                        | -934.6640481                                          |
| <b>ZPE (raw)</b>             | 0.256011                                      | 0.262246                                            | 0.273992                                              |
| <b>Therm Corr to H (raw)</b> | 0.272632                                      | 0.280341                                            | 0.293548                                              |
| <b>Therm Corr to G (raw)</b> | 0.212953                                      | 0.216181                                            | 0.225219                                              |
| <b>H (raw)</b>               |                                               |                                                     |                                                       |
| <b>G (raw)</b>               |                                               |                                                     |                                                       |
| <b>ZPE (scaled)</b>          | 0.251044                                      | 0.257158                                            | 0.268677                                              |
| <b>Electronic State</b>      | 1-A                                           | 2-A                                                 | 2-A                                                   |
| <b>s2 6-31g*</b>             | 0                                             | 0.7546                                              | 0.7546                                                |
| <b>Symmetry</b>              | -                                             | -                                                   | -                                                     |
| <b>N Imag</b>                | 0.000000                                      | 0.000000                                            | 0.000000                                              |
| <b>Rotational Con. (GHz)</b> | 1.05713                                       | 0.7764751                                           | 0.7779518                                             |
| <b>Rotational Con. (GHz)</b> | 0.2780761                                     | 0.2442765                                           | 0.2577386                                             |
| <b>Rotational Con. (GHz)</b> | 0.2566142                                     | 0.2374887                                           | 0.2230323                                             |
| <b>H298</b>                  |                                               |                                                     |                                                       |
| <b>6-31+g* */PCM</b>         | -783.567363                                   | -934.010107                                         | -934.489832                                           |
| <b>6-31g*</b>                | -783.473683                                   | -933.831624                                         | -934.375816                                           |
| <b>G298</b>                  |                                               |                                                     |                                                       |
| <b>6-31+g* */PCM</b>         | -783.627042                                   | -934.074267                                         | -934.558161                                           |
| <b>6-31g*</b>                | -783.533362                                   | -933.895784                                         | -934.444145                                           |

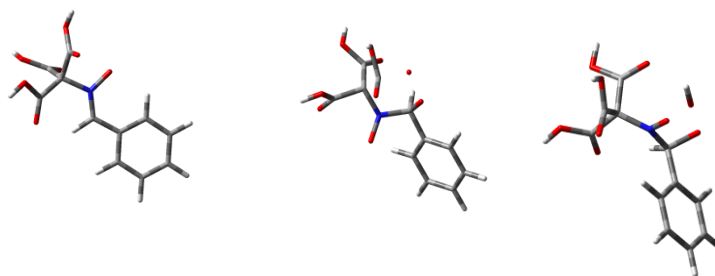

| Compound              | PBN-tri-COOH<br>PBN-alpha-3COOH.com.log | PBN-tri-COOH-O2<br>PBN-alpha-3COOH-O2.com.log | PBN-tri-COOH-HO2<br>PBN-alpha-3COOH-HO2.com.log |
|-----------------------|-----------------------------------------|-----------------------------------------------|-------------------------------------------------|
| file                  |                                         |                                               |                                                 |
| E 6-31+g**/PCM        | -1005.949879                            | -1156.421609                                  | -1156.898846                                    |
| E 6-31g*              | -1005.842291                            | -1156.221144                                  | -1156.781925                                    |
| ZPE (raw)             | 0.199009                                | 0.204553                                      | 0.217728                                        |
| Therm Corr to H (raw) | 0.217011                                | 0.224085                                      | 0.238365                                        |
| Therm Corr to G (raw) | 0.152522                                | 0.1561                                        | 0.166717                                        |
| H (raw)               |                                         |                                               |                                                 |
| G (raw)               |                                         |                                               |                                                 |
| ZPE (scaled)          | 0.195148                                | 0.200585                                      | 0.213504                                        |
| Electronic State      | 1-A                                     | 2-A                                           | 2-A                                             |
| s2 6-31g*             | 0                                       | 0.7544                                        | 0.7541                                          |
| Symmetry              | -                                       | -                                             | -                                               |
| N Imag                | 0.000000                                | 0.000000                                      | 0.000000                                        |
| Rotational Con. (GHz) | 0.7478393                               | 0.6203126                                     | 0.5272232                                       |
| Rotational Con. (GHz) | 0.2261233                               | 0.2206767                                     | 0.2378425                                       |
| Rotational Con. (GHz) | 0.2140926                               | 0.2057931                                     | 0.2072945                                       |
| H298                  |                                         |                                               |                                                 |
| 6-31+g* */PCM         | -1005.736729                            | -1156.201492                                  | -1156.664705                                    |
| 6-31g*                | -1005.629141                            | -1156.001027                                  | -1156.547784                                    |
| G298                  |                                         |                                               |                                                 |
| 6-31+g* */PCM         | -1005.801218                            | -1156.269477                                  | -1156.736353                                    |
| 6-31g*                | -1005.693630                            | -1156.069012                                  | -1156.619432                                    |



**Table S4.** Cartesian coordinates.

PBN-alpha-carbamate.log

33

|   |           |           |           |
|---|-----------|-----------|-----------|
| C | 4.302955  | -0.286573 | -0.529872 |
| C | 2.969698  | -0.677165 | -0.420055 |
| C | 2.020702  | 0.202212  | 0.144116  |
| C | 2.458462  | 1.470457  | 0.584831  |
| C | 3.790548  | 1.849871  | 0.470879  |
| C | 4.721834  | 0.970014  | -0.088413 |
| H | 5.022542  | -0.974188 | -0.966873 |
| H | 2.640900  | -1.648762 | -0.761365 |
| H | 1.737043  | 2.159821  | 1.018195  |
| H | 4.104012  | 2.831389  | 0.816657  |
| H | 5.764246  | 1.263621  | -0.179497 |
| C | 0.611740  | -0.098051 | 0.312532  |
| H | -0.016603 | 0.649404  | 0.773982  |
| N | 0.001780  | -1.209677 | -0.030934 |
| O | 0.551400  | -2.240032 | -0.553834 |
| C | -1.482114 | -1.423999 | 0.274277  |
| C | -2.147808 | -2.070069 | -0.940173 |
| H | -3.216696 | -2.178838 | -0.729526 |
| H | -2.016404 | -1.461050 | -1.832791 |
| H | -1.710424 | -3.054006 | -1.106269 |
| C | -1.542334 | -2.322918 | 1.509254  |
| H | -0.941300 | -3.215613 | 1.326172  |
| H | -1.147790 | -1.794043 | 2.381866  |
| H | -2.578044 | -2.612828 | 1.708338  |
| C | -2.410397 | 0.792808  | -0.229138 |
| O | -2.048759 | 0.828408  | -1.387039 |
| O | -2.107424 | -0.202047 | 0.681486  |
| N | -3.148396 | 1.739176  | 0.410260  |
| H | -3.413723 | 1.552979  | 1.366218  |
| C | -3.640592 | 2.926072  | -0.263561 |
| H | -4.734126 | 2.915944  | -0.347269 |
| H | -3.334543 | 3.833002  | 0.269799  |
| H | -3.210679 | 2.940080  | -1.265880 |

PBN-alpha-carboxyl.log

31

|   |           |           |           |
|---|-----------|-----------|-----------|
| C | -3.972849 | -0.692545 | -0.723843 |
| C | -2.597255 | -0.862384 | -0.579593 |
| C | -1.843904 | 0.074903  | 0.159792  |
| C | -2.518167 | 1.172022  | 0.740359  |
| C | -3.890628 | 1.330896  | 0.590889  |
| C | -4.626348 | 0.396670  | -0.144201 |
| H | -4.539910 | -1.422156 | -1.296165 |
| H | -2.088240 | -1.704874 | -1.026406 |
| H | -1.950601 | 1.901867  | 1.313612  |
| H | -4.388228 | 2.182423  | 1.047296  |
| H | -5.699769 | 0.518069  | -0.262522 |
| C | -0.411685 | 0.001573  | 0.371771  |
| H | 0.054006  | 0.778542  | 0.966235  |
| N | 0.408047  | -0.929775 | -0.072498 |
| O | 0.071465  | -1.948824 | -0.756377 |
| C | 1.897346  | -0.851895 | 0.318878  |
| C | 2.026962  | -1.367085 | 1.755780  |
| H | 3.081923  | -1.424339 | 2.040624  |
| H | 1.521949  | -0.707574 | 2.464488  |
| H | 1.589841  | -2.368012 | 1.816862  |
| C | 2.694063  | -1.716164 | -0.662400 |
| H | 2.390576  | -2.759309 | -0.569492 |
| H | 2.534398  | -1.396553 | -1.692427 |
| H | 3.759696  | -1.628611 | -0.424019 |
| C | 2.808229  | 2.407510  | -1.230780 |
| H | 2.081703  | 3.073661  | -0.758115 |
| H | 3.794570  | 2.588491  | -0.796343 |
| H | 2.826221  | 2.561999  | -2.309454 |
| C | 2.344628  | 0.617002  | 0.228639  |

O 2.595420 1.321666 1.183927  
O 2.422263 1.033630 -1.047353

PBN-alpha-CH2CONH2.log

32

C 3.710067 0.479590 -1.119623  
C 2.356671 0.164003 -1.014791  
C 1.828420 -0.278040 0.217258  
C 2.701212 -0.389952 1.322201  
C 4.048721 -0.070732 1.207438  
C 4.559921 0.367370 -0.017727  
H 4.103815 0.816496 -2.074948  
H 1.696339 0.243990 -1.866525  
H 2.308669 -0.729961 2.277977  
H 4.701141 -0.162856 2.071414  
H 5.613206 0.617830 -0.110959  
C 0.440704 -0.636707 0.450932  
H 0.183004 -0.990504 1.437949  
N -0.549870 -0.571374 -0.407547  
O -0.426448 -0.154218 -1.623783  
C -1.977283 -0.984147 -0.042201  
C -2.297253 -2.213303 -0.907300  
H -3.355578 -2.473899 -0.804130  
H -2.081928 -2.000406 -1.956439  
H -1.698784 -3.075234 -0.591714  
C -2.149777 -1.307922 1.445350  
H -1.535501 -2.160399 1.753603  
H -1.940488 -0.445855 2.084026  
H -3.195105 -1.585134 1.612719  
C -2.890714 0.201496 -0.454517  
H -2.860538 0.304777 -1.540762  
H -3.911603 -0.043094 -0.150329  
C -2.518529 1.523401 0.223027  
O -2.994693 1.863986 1.299886  
N -1.626277 2.281351 -0.480688  
H -1.235407 3.081529 -0.000518  
H -1.062039 1.824407 -1.192817

PBN-alpha-CH2OH.com.log

29

C 3.590355 -1.270493 -0.069780  
C 2.212918 -1.070597 0.003833  
C 1.687626 0.239614 -0.001481  
C 2.590221 1.323397 -0.082632  
C 3.961876 1.112925 -0.155875  
C 4.469996 -0.189452 -0.149905  
H 3.979323 -2.285499 -0.064192  
H 1.528775 -1.904889 0.066011  
H 2.201419 2.339543 -0.087948  
H 4.635969 1.963173 -0.217706  
H 5.542130 -0.357652 -0.207139  
C 0.276436 0.572712 0.069671  
H 0.013215 1.619414 0.059614  
N -0.731233 -0.270911 0.150466  
O -0.608417 -1.546590 0.179849  
C -2.178012 0.208198 0.232969  
C -2.722699 -0.254747 1.591281  
H -3.804489 -0.102022 1.616999  
H -2.503348 -1.314650 1.736699  
H -2.265016 0.315415 2.407128  
C -2.335629 1.721361 0.067707  
H -1.876276 2.275128 0.892908  
H -1.919795 2.077637 -0.881090  
H -3.404987 1.946337 0.063343  
C -2.897925 -0.520871 -0.923397  
O -4.264809 -0.121337 -0.903881  
H -4.754896 -0.722917 -1.482812  
H -2.782640 -1.599469 -0.782713  
H -2.415931 -0.242027 -1.874440

## PBN-alpha-CONH2.log

29

|   |           |           |           |
|---|-----------|-----------|-----------|
| C | 3.674236  | -1.244510 | 0.088418  |
| C | 2.303899  | -1.022379 | 0.209336  |
| C | 1.779608  | 0.273942  | 0.017188  |
| C | 2.673987  | 1.321803  | -0.295737 |
| C | 4.038704  | 1.089261  | -0.414761 |
| C | 4.545842  | -0.199069 | -0.222273 |
| H | 4.064206  | -2.247588 | 0.239717  |
| H | 1.626597  | -1.828546 | 0.451740  |
| H | 2.284642  | 2.326280  | -0.446467 |
| H | 4.707571  | 1.910576  | -0.656942 |
| H | 5.612643  | -0.384576 | -0.313751 |
| C | 0.376609  | 0.633902  | 0.114092  |
| H | 0.123105  | 1.669961  | -0.050896 |
| N | -0.631525 | -0.163591 | 0.384567  |
| O | -0.498845 | -1.429664 | 0.612167  |
| C | -2.070354 | 0.347029  | 0.428521  |
| C | -2.705230 | -0.207484 | 1.717402  |
| H | -3.771209 | 0.038036  | 1.721708  |
| H | -2.582109 | -1.288373 | 1.777718  |
| H | -2.237399 | 0.250447  | 2.595931  |
| C | -2.167673 | 1.873386  | 0.410010  |
| H | -1.626540 | 2.310015  | 1.255327  |
| H | -1.806912 | 2.306062  | -0.526770 |
| H | -3.221570 | 2.144032  | 0.488668  |
| C | -2.848355 | -0.215410 | -0.808558 |
| N | -2.573682 | -1.496656 | -1.142899 |
| H | -3.037697 | -1.883150 | -1.952796 |
| H | -1.809737 | -1.982858 | -0.678841 |
| O | -3.688252 | 0.476987  | -1.369399 |

## PBN-alpha-COOH.com.log

28

|   |           |           |           |
|---|-----------|-----------|-----------|
| C | 3.607540  | -1.375417 | 0.130823  |
| C | 2.247597  | -1.077637 | 0.192982  |
| C | 1.808069  | 0.251102  | 0.011013  |
| C | 2.773636  | 1.252590  | -0.232273 |
| C | 4.127466  | 0.944654  | -0.291002 |
| C | 4.551383  | -0.374932 | -0.108875 |
| H | 3.932021  | -2.403186 | 0.271187  |
| H | 1.513279  | -1.849341 | 0.376426  |
| H | 2.448925  | 2.280921  | -0.376320 |
| H | 4.852720  | 1.731692  | -0.479374 |
| H | 5.609261  | -0.619427 | -0.154620 |
| C | 0.422119  | 0.678386  | 0.052440  |
| H | 0.216836  | 1.723747  | -0.124804 |
| N | -0.626299 | -0.079414 | 0.284386  |
| O | -0.601677 | -1.340156 | 0.509879  |
| C | -2.034668 | 0.484398  | 0.331015  |
| C | -2.534691 | 0.312410  | 1.769554  |
| H | -3.588115 | 0.594796  | 1.841063  |
| H | -2.420732 | -0.724652 | 2.085672  |
| H | -1.952653 | 0.957289  | 2.436774  |
| C | -2.151883 | 1.941157  | -0.134828 |
| H | -1.629126 | 2.620770  | 0.545152  |
| H | -1.774242 | 2.065226  | -1.152665 |
| H | -3.209656 | 2.224764  | -0.130727 |
| C | -2.788061 | -0.384772 | -0.701144 |
| O | -2.507747 | -0.408932 | -1.876449 |
| O | -3.834334 | -1.052290 | -0.174915 |
| H | -4.235412 | -1.547302 | -0.914810 |

## PBN-alpha-ester.log

31

|   |          |           |          |
|---|----------|-----------|----------|
| C | 3.692550 | -1.193138 | 0.829071 |
| C | 2.357093 | -0.797859 | 0.782134 |

|   |           |           |           |
|---|-----------|-----------|-----------|
| C | 1.953877  | 0.222145  | -0.106281 |
| C | 2.930635  | 0.816394  | -0.935605 |
| C | 4.259458  | 0.413674  | -0.881580 |
| C | 4.647625  | -0.595587 | 0.004483  |
| H | 3.988430  | -1.980161 | 1.517890  |
| H | 1.613556  | -1.260777 | 1.415442  |
| H | 2.634263  | 1.601409  | -1.628041 |
| H | 4.993257  | 0.884886  | -1.530024 |
| H | 5.685884  | -0.913490 | 0.048751  |
| C | 0.598039  | 0.719794  | -0.236082 |
| H | 0.417540  | 1.492086  | -0.968561 |
| N | -0.453020 | 0.320725  | 0.445508  |
| O | -0.458642 | -0.597366 | 1.333530  |
| C | -1.811486 | 1.008927  | 0.276871  |
| C | -2.074266 | 1.775602  | 1.570714  |
| H | -3.092512 | 2.174425  | 1.560329  |
| H | -1.956737 | 1.096975  | 2.417217  |
| H | -1.367214 | 2.605137  | 1.667718  |
| C | -1.932244 | 1.894804  | -0.961655 |
| H | -1.312492 | 2.791420  | -0.868850 |
| H | -1.674347 | 1.352058  | -1.871447 |
| H | -2.974570 | 2.220209  | -1.033381 |
| C | -2.700249 | -1.049728 | -0.638936 |
| O | -1.932623 | -1.062479 | -1.571918 |
| O | -2.798099 | -0.029947 | 0.263623  |
| C | -3.677858 | -2.141695 | -0.285372 |
| H | -3.325353 | -2.648074 | 0.619923  |
| H | -4.665746 | -1.725073 | -0.068182 |
| H | -3.736946 | -2.857751 | -1.105770 |

PBN-alpha-ether.log

29

|   |           |           |           |
|---|-----------|-----------|-----------|
| C | -3.434398 | -1.251101 | -0.166653 |
| C | -2.058090 | -1.036093 | -0.213860 |
| C | -1.538906 | 0.262205  | -0.019268 |
| C | -2.445586 | 1.318064  | 0.223822  |
| C | -3.815912 | 1.092373  | 0.269577  |
| C | -4.318246 | -0.197546 | 0.073394  |
| H | -3.819031 | -2.256197 | -0.319346 |
| H | -1.370503 | -1.849196 | -0.398938 |
| H | -2.061077 | 2.324488  | 0.375942  |
| H | -4.493666 | 1.920882  | 0.457476  |
| H | -5.389408 | -0.377500 | 0.108168  |
| C | -0.129325 | 0.606098  | -0.049979 |
| H | 0.132029  | 1.640086  | 0.117657  |
| N | 0.877274  | -0.214592 | -0.271642 |
| O | 0.766569  | -1.468313 | -0.480792 |
| C | 2.340937  | 0.284996  | -0.305109 |
| C | 2.838781  | 0.057738  | -1.730765 |
| H | 3.910947  | 0.269031  | -1.773662 |
| H | 2.663576  | -0.984578 | -2.001347 |
| H | 2.315541  | 0.712352  | -2.434701 |
| C | 2.492723  | 1.748094  | 0.126356  |
| H | 2.011795  | 2.434672  | -0.576048 |
| H | 2.098747  | 1.937260  | 1.128835  |
| H | 3.563207  | 1.972449  | 0.136022  |
| C | 2.667741  | -0.780829 | 1.842769  |
| H | 1.701426  | -1.296521 | 1.861991  |
| H | 3.424317  | -1.422800 | 2.299368  |
| H | 2.605746  | 0.151927  | 2.420008  |
| O | 3.104321  | -0.568962 | 0.505586  |

PBN-alpha-ethylester.com.log

34

|   |           |           |           |
|---|-----------|-----------|-----------|
| C | -3.820780 | -1.262443 | -1.052918 |
| C | -2.546747 | -0.708697 | -0.942384 |
| C | -2.227034 | 0.111259  | 0.161102  |
| C | -3.222249 | 0.345050  | 1.135724  |
| C | -4.489083 | -0.213320 | 1.016404  |

C -4.795147 -1.021465 -0.082505  
H -4.052617 -1.892056 -1.908068  
H -1.788161 -0.896657 -1.689071  
H -2.989304 0.972046 1.993711  
H -5.238453 -0.019934 1.779317  
H -5.784734 -1.460187 -0.178671  
C -0.941549 0.746579 0.377024  
H -0.820262 1.336862 1.272713  
N 0.111981 0.672924 -0.405995  
O 0.186144 0.004157 -1.491761  
C 1.377896 1.481494 -0.104587  
C 1.475084 2.556688 -1.183875  
H 2.431810 3.078959 -1.095414  
H 1.406462 2.083918 -2.164973  
H 0.661816 3.280068 -1.070415  
C 1.446732 2.062765 1.306585  
H 0.709837 2.859560 1.443774  
H 1.312812 1.292251 2.066391  
H 2.439267 2.506463 1.431268  
C 2.568632 -0.593762 0.278262  
O 1.857439 -0.927385 1.197266  
O 2.489080 0.612586 -0.355965  
C 3.663667 -1.432333 -0.344898  
H 3.334694 -1.663013 -1.366855  
H 4.556581 -0.805055 -0.455958  
C 3.957304 -2.706367 0.444526  
H 4.730140 -3.296327 -0.058619  
H 4.306570 -2.473803 1.455564  
H 3.058012 -3.321127 0.540191

PBN-alpha-methylcarbamate.log

36

C -4.648548 1.593519 0.553193  
C -3.357334 1.070585 0.594766  
C -3.029298 -0.062375 -0.180700  
C -4.035876 -0.639016 -0.986898  
C -5.319919 -0.108977 -1.021582  
C -5.632782 1.013417 -0.249138  
H -4.886748 2.465573 1.156649  
H -2.593111 1.516486 1.215315  
H -3.798898 -1.513007 -1.589874  
H -6.077570 -0.569823 -1.649626  
H -6.635989 1.430403 -0.273504  
C -1.724058 -0.696303 -0.220098  
H -1.614250 -1.567093 -0.848702  
N -0.646434 -0.326612 0.438972  
O -0.588008 0.678940 1.234463  
C 0.666942 -1.095476 0.329672  
C 0.946708 -1.701188 1.711918  
H 1.959986 -2.110431 1.733480  
H 0.850450 -0.931893 2.481282  
H 0.236624 -2.506472 1.927659  
C 0.662077 -2.174153 -0.755470  
H -0.029401 -2.988613 -0.518145  
H 0.411600 -1.766248 -1.740909  
H 1.668412 -2.595455 -0.816518  
C 1.710547 -0.006267 -0.009701  
H 1.718373 0.739340 0.787578  
H 1.433776 0.476066 -0.959287  
C 4.142371 0.062631 -0.249312  
O 5.200471 -0.528959 -0.266357  
O 2.977850 -0.652155 -0.131469  
N 4.016735 1.423262 -0.317790  
H 3.112483 1.839273 -0.478270  
C 5.191999 2.250031 -0.547063  
H 5.463931 2.303286 -1.609503  
H 4.996688 3.260156 -0.176837  
H 6.032046 1.820724 0.000332

PBN-alpha-methylcarboxy.log

|   |           |           |           |
|---|-----------|-----------|-----------|
| C | 3.802258  | 0.951008  | -1.195305 |
| C | 2.525249  | 0.410688  | -1.054698 |
| C | 2.129951  | -0.157423 | 0.175507  |
| C | 3.055992  | -0.158862 | 1.242049  |
| C | 4.326539  | 0.383602  | 1.091645  |
| C | 4.706898  | 0.942431  | -0.132017 |
| H | 4.092068  | 1.384884  | -2.148941 |
| H | 1.821028  | 0.417289  | -1.874513 |
| H | 2.765290  | -0.590844 | 2.197208  |
| H | 5.021052  | 0.371937  | 1.927502  |
| H | 5.699745  | 1.367537  | -0.253236 |
| C | 0.832859  | -0.752674 | 0.439975  |
| H | 0.660505  | -1.147419 | 1.429384  |
| N | -0.174337 | -0.849956 | -0.398718 |
| O | -0.166690 | -0.412462 | -1.604772 |
| C | -1.483539 | -1.538653 | -0.014721 |
| C | -1.581623 | -2.782526 | -0.914854 |
| H | -2.561114 | -3.257608 | -0.794622 |
| H | -1.444151 | -2.500342 | -1.960605 |
| H | -0.811435 | -3.512287 | -0.642625 |
| C | -1.556325 | -1.948167 | 1.461045  |
| H | -0.801958 | -2.702944 | 1.706383  |
| H | -1.455131 | -1.089865 | 2.127221  |
| H | -2.536033 | -2.404162 | 1.641629  |
| C | -2.611380 | -0.554753 | -0.394574 |
| H | -3.574069 | -1.004559 | -0.119325 |
| H | -2.620455 | -0.408228 | -1.475374 |
| C | -3.303765 | 3.034002  | 0.108155  |
| H | -3.711492 | 3.035730  | 1.122717  |
| H | -2.294836 | 3.453660  | 0.129196  |
| H | -3.943784 | 3.606116  | -0.563978 |
| O | -3.280788 | 1.699810  | -0.426716 |
| C | -2.533429 | 0.812394  | 0.261578  |
| O | -1.920394 | 1.098201  | 1.269026  |

## PBN-alpha-methylether.log

32

|   |           |           |           |
|---|-----------|-----------|-----------|
| C | 3.901764  | -1.374005 | 0.028873  |
| C | 2.542842  | -1.092578 | 0.158930  |
| C | 2.067865  | 0.217453  | -0.066711 |
| C | 3.000873  | 1.216630  | -0.423249 |
| C | 4.353692  | 0.925252  | -0.550143 |
| C | 4.811908  | -0.375975 | -0.323804 |
| H | 4.252028  | -2.387687 | 0.205941  |
| H | 1.835800  | -1.863110 | 0.431619  |
| H | 2.650661  | 2.231412  | -0.600488 |
| H | 5.051784  | 1.711465  | -0.825203 |
| H | 5.869150  | -0.607632 | -0.421896 |
| C | 0.680304  | 0.631082  | 0.037042  |
| H | 0.455792  | 1.667043  | -0.166105 |
| N | -0.347239 | -0.126208 | 0.360690  |
| O | -0.268547 | -1.374629 | 0.639356  |
| C | -1.764395 | 0.434352  | 0.447994  |
| C | -2.217847 | 0.267461  | 1.904923  |
| H | -3.285208 | 0.490229  | 1.979467  |
| H | -2.038699 | -0.758232 | 2.233771  |
| H | -1.666755 | 0.949813  | 2.561414  |
| C | -1.876199 | 1.895069  | 0.005522  |
| H | -1.329982 | 2.569594  | 0.672806  |
| H | -1.525292 | 2.043055  | -1.021678 |
| H | -2.932955 | 2.171099  | 0.034214  |
| C | -2.598601 | -0.463408 | -0.492892 |
| H | -2.514683 | -1.506791 | -0.167205 |
| H | -2.197223 | -0.392166 | -1.518768 |
| C | -4.800710 | -0.817790 | -1.239373 |
| H | -4.801388 | -1.866047 | -0.902174 |
| H | -5.808079 | -0.407016 | -1.133152 |

H -4.514800 -0.796331 -2.303112  
O -3.941260 -0.018685 -0.452725

PBN-alpha-methylphosphoryl.log

39

C -4.359861 -0.829013 -1.050664  
C -3.126971 -0.185356 -0.958241  
C -2.589043 0.132799 0.307710  
C -3.328799 -0.217213 1.458954  
C -4.554673 -0.863462 1.355739  
C -5.077114 -1.173128 0.096501  
H -4.763147 -1.064218 -2.032272  
H -2.570454 0.086067 -1.844180  
H -2.926591 0.020853 2.440980  
H -5.103941 -1.126082 2.255829  
H -6.035759 -1.678038 0.012253  
C -1.329438 0.819344 0.531349  
N -0.449540 1.167013 -0.379685  
O -0.563377 0.911449 -1.637537  
C 0.820717 1.940270 -0.028433  
C 0.738882 3.254301 -0.827143  
H 1.667141 3.821288 -0.703097  
H 0.580109 3.046069 -1.886405  
H -0.090328 3.870391 -0.462028  
C 0.956986 2.250725 1.466889  
H 0.132478 2.878871 1.819748  
H 1.024063 1.343896 2.071357  
H 1.881472 2.820430 1.610992  
C 2.014824 1.108533 -0.555137  
H 2.936339 1.666060 -0.360431  
H 1.914958 0.988735 -1.636405  
H -1.068142 1.056151 1.550926  
P 2.258367 -0.567662 0.157533  
O 3.875639 -0.607934 0.176527  
O 1.956779 -1.639415 -1.018290  
C 0.628542 -2.183400 -1.178870  
H -0.039539 -1.417113 -1.582241  
H 0.724909 -3.009699 -1.885819  
H 0.249290 -2.552193 -0.222170  
C 4.533577 -1.815564 0.600803  
H 4.162176 -2.132018 1.580226  
H 4.374274 -2.610927 -0.133089  
H 5.596939 -1.579272 0.667524  
O 1.563366 -0.853652 1.443843

PBN-alpha-methylthio.log

32

C 4.193370 -1.404218 0.263987  
C 2.848162 -1.057318 0.377136  
C 2.393622 0.181835 -0.123172  
C 3.332197 1.044103 -0.732570  
C 4.671152 0.688292 -0.840559  
C 5.109267 -0.541672 -0.340960  
H 4.528172 -2.361713 0.654651  
H 2.136246 -1.722244 0.844991  
H 2.997926 2.002872 -1.123409  
H 5.374198 1.368708 -1.313660  
H 6.155697 -0.823102 -0.423378  
C 1.021556 0.653212 -0.063396  
H 0.815149 1.625784 -0.482885  
N -0.008800 0.018433 0.455194  
O 0.051782 -1.141228 0.993616  
C -1.419447 0.631191 0.464769  
C -1.821232 0.723150 1.944724  
H -2.858382 1.055792 2.035631  
H -1.715712 -0.252172 2.422673  
H -1.177263 1.440296 2.465687  
C -1.477861 2.011524 -0.196307

|   |           |           |           |
|---|-----------|-----------|-----------|
| H | -0.847197 | 2.738366  | 0.325526  |
| H | -1.192704 | 1.977986  | -1.253009 |
| H | -2.507452 | 2.378225  | -0.150036 |
| C | -2.270156 | -0.398318 | -0.315517 |
| H | -2.152873 | -1.371940 | 0.163851  |
| H | -1.889716 | -0.468766 | -1.341648 |
| S | -4.056347 | 0.039288  | -0.373001 |
| C | -4.684332 | -1.499495 | -1.129491 |
| H | -4.466025 | -2.365834 | -0.497965 |
| H | -5.768111 | -1.389686 | -1.219590 |
| H | -4.260859 | -1.654102 | -2.126567 |

PBN-alpha-phosphoryl.log

36

|   |           |           |           |
|---|-----------|-----------|-----------|
| C | 4.500481  | 0.003698  | 1.018231  |
| C | 3.155885  | 0.347487  | 0.890637  |
| C | 2.480498  | 0.117729  | -0.328037 |
| C | 3.200305  | -0.463719 | -1.396238 |
| C | 4.539660  | -0.805261 | -1.256669 |
| C | 5.197798  | -0.572221 | -0.045167 |
| H | 5.007684  | 0.188301  | 1.961697  |
| H | 2.613718  | 0.797034  | 1.710311  |
| H | 2.692188  | -0.649090 | -2.339677 |
| H | 5.072164  | -1.253144 | -2.091367 |
| H | 6.245594  | -0.838022 | 0.066608  |
| C | 1.089867  | 0.437314  | -0.584103 |
| N | 0.227891  | 0.949851  | 0.271446  |
| O | 0.491951  | 1.217099  | 1.496711  |
| C | -1.221526 | 1.208844  | -0.174989 |
| C | -1.877144 | 2.141677  | 0.848188  |
| H | -2.916541 | 2.308565  | 0.555959  |
| H | -1.847696 | 1.718958  | 1.850899  |
| H | -1.350670 | 3.100666  | 0.865445  |
| C | -1.265883 | 1.828959  | -1.581860 |
| H | -0.606338 | 2.702311  | -1.623052 |
| H | -0.979029 | 1.127691  | -2.368315 |
| H | -2.287843 | 2.156367  | -1.793714 |
| H | 0.691504  | 0.203570  | -1.560370 |
| P | -2.034803 | -0.466100 | -0.203845 |
| O | -3.578840 | -0.034843 | -0.383169 |
| O | -2.032994 | -1.009835 | 1.316775  |
| C | -0.918232 | -1.777340 | 1.827578  |
| H | -1.295753 | -2.318617 | 2.696983  |
| H | -0.563228 | -2.483091 | 1.072350  |
| H | -0.119531 | -1.093718 | 2.126652  |
| C | -4.575298 | -1.065095 | -0.539261 |
| H | -4.651628 | -1.657507 | 0.377240  |
| H | -5.519094 | -0.551093 | -0.727024 |
| H | -4.325347 | -1.712659 | -1.384281 |
| O | -1.476595 | -1.399474 | -1.218897 |

PBN-alpha-thio.log

29

|   |           |           |           |
|---|-----------|-----------|-----------|
| C | 3.635728  | -1.328548 | 0.290531  |
| C | 2.280958  | -1.013247 | 0.376019  |
| C | 1.828271  | 0.269089  | -0.003611 |
| C | 2.779996  | 1.206767  | -0.463625 |
| C | 4.128543  | 0.882035  | -0.544544 |
| C | 4.564140  | -0.391493 | -0.166548 |
| H | 3.968356  | -2.320383 | 0.585673  |
| H | 1.560225  | -1.736507 | 0.729621  |
| H | 2.447651  | 2.199091  | -0.760943 |
| H | 4.841082  | 1.620298  | -0.902675 |
| H | 5.618090  | -0.648970 | -0.228613 |
| C | 0.448218  | 0.713861  | 0.038990  |
| H | 0.242284  | 1.717619  | -0.300471 |
| N | -0.595958 | 0.014276  | 0.432057  |
| O | -0.538284 | -1.195614 | 0.852584  |
| C | -2.009281 | 0.591568  | 0.374357  |



|   |           |           |           |
|---|-----------|-----------|-----------|
| C | -2.724773 | 0.165855  | 1.658589  |
| H | -3.763446 | 0.504394  | 1.621279  |
| H | -2.691667 | -0.914242 | 1.790754  |
| H | -2.233775 | 0.625945  | 2.524691  |
| C | -2.034872 | 2.118944  | 0.235283  |
| H | -1.453070 | 2.587278  | 1.036045  |
| H | -1.656819 | 2.464118  | -0.731420 |
| H | -3.070504 | 2.457278  | 0.322757  |
| S | -2.837691 | -0.045774 | -1.161020 |
| C | -3.019374 | -1.842944 | -0.869109 |
| H | -2.055329 | -2.285153 | -0.617952 |
| H | -3.748308 | -2.051646 | -0.082222 |
| H | -3.389050 | -2.253086 | -1.813275 |

PBN-CH2NHCOMe-c.out  
35

|   |           |           |           |
|---|-----------|-----------|-----------|
| C | -4.018348 | -1.807191 | 0.152757  |
| C | -2.748633 | -1.234417 | 0.198068  |
| C | -2.588577 | 0.147545  | -0.040093 |
| C | -3.738576 | 0.917895  | -0.322185 |
| C | -5.000071 | 0.336711  | -0.365931 |
| C | -5.145655 | -1.032998 | -0.127664 |
| H | -4.126189 | -2.872472 | 0.339382  |
| H | -1.874450 | -1.830854 | 0.416170  |
| H | -3.631849 | 1.984630  | -0.507410 |
| H | -5.869966 | 0.949910  | -0.585097 |
| H | -6.130529 | -1.491037 | -0.160530 |
| C | -1.323384 | 0.860241  | -0.015239 |
| H | -1.355436 | 1.922753  | -0.203014 |
| N | -0.132163 | 0.355432  | 0.217589  |
| O | 0.080961  | -0.892286 | 0.460280  |
| C | 1.134081  | 1.210839  | 0.216436  |
| C | 2.071615  | 0.618572  | -0.872967 |
| H | 2.909574  | 1.305180  | -1.016406 |
| H | 1.510748  | 0.563158  | -1.815621 |
| C | 0.864514  | 2.677321  | -0.139242 |
| H | 0.457328  | 2.793570  | -1.149589 |
| H | 0.188912  | 3.157727  | 0.575354  |
| C | 1.745471  | 1.104572  | 1.619259  |
| H | 1.826615  | 0.060157  | 1.921754  |
| H | 1.123566  | 1.633619  | 2.349711  |
| N | 2.653440  | -0.666805 | -0.560644 |
| H | 1.992923  | -1.381232 | -0.280027 |
| C | 3.992936  | -0.814353 | -0.325171 |
| O | 4.802203  | 0.098850  | -0.457907 |
| C | 4.424848  | -2.213081 | 0.089465  |
| H | 3.591859  | -2.912545 | 0.208500  |
| H | 5.113861  | -2.607186 | -0.664456 |
| H | 4.977516  | -2.147099 | 1.031577  |
| H | 1.815464  | 3.217385  | -0.101147 |
| H | 2.744467  | 1.551495  | 1.618290  |

PBN.log  
28

|   |           |           |           |
|---|-----------|-----------|-----------|
| C | -3.248732 | -1.245753 | 0.000037  |
| C | -1.866895 | -1.063361 | -0.000075 |
| C | -1.325905 | 0.240466  | -0.000100 |
| C | -2.218029 | 1.335857  | -0.000088 |
| C | -3.594240 | 1.142909  | 0.000031  |
| C | -4.117880 | -0.153295 | 0.000101  |
| H | -3.649534 | -2.256167 | 0.000074  |
| H | -1.190964 | -1.906606 | -0.000181 |
| H | -1.817495 | 2.347509  | -0.000129 |
| H | -4.259872 | 2.002065  | 0.000066  |
| H | -5.193587 | -0.307851 | 0.000157  |
| C | 0.091582  | 0.555292  | -0.000130 |
| H | 0.365370  | 1.599189  | -0.000168 |
| N | 1.091127  | -0.302389 | -0.000121 |

O 0.953047 -1.574084 -0.000205  
C 2.553621 0.156255 0.000084  
C 3.184473 -0.445345 -1.265501  
H 4.260627 -0.243382 -1.274353  
H 3.020843 -1.523966 -1.288714  
H 2.744310 -0.004830 -2.167312  
C 2.710131 1.680283 -0.001696  
H 2.274860 2.141426 -0.894600  
H 2.274263 2.143659 0.889765  
H 3.779730 1.915013 -0.001643  
C 3.183219 -0.442494 1.267619  
H 3.019511 -1.521057 1.292920  
H 4.259379 -0.240566 1.276936  
H 2.742224 0.000068 2.167987

PBN-NHCOMe-c.log  
32

C -3.752919 0.946909 -1.036062  
C -2.416992 0.558361 -0.956253  
C -1.965110 -0.191881 0.150392  
C -2.893811 -0.528587 1.159404  
C -4.223669 -0.134847 1.070740  
C -4.660307 0.606524 -0.031052  
H -4.087185 1.524487 -1.894082  
H -1.709460 0.821260 -1.730011  
H -2.558809 -1.103997 2.019647  
H -4.920505 -0.404466 1.859841  
H -5.699427 0.916537 -0.103089  
C -0.602306 -0.656183 0.335725  
H -0.383897 -1.220610 1.229996  
N 0.413547 -0.455611 -0.471858  
O 0.374775 0.212175 -1.565454  
C 1.815295 -1.042149 -0.187992  
N 2.753497 0.061484 -0.312827  
H 2.931611 0.307024 -1.279358  
C 2.775588 1.145318 0.552553  
O 2.258569 1.140244 1.658580  
C 3.518426 2.353679 0.003711  
H 2.855129 2.911573 -0.668774  
H 3.797128 3.003513 0.834539  
H 4.413267 2.069094 -0.559906  
C 1.936846 -1.742782 1.166839  
H 1.301748 -2.633281 1.200291  
H 2.975313 -2.068377 1.279617  
H 1.702442 -1.072445 1.992521  
C 2.085911 -2.029722 -1.330497  
H 1.395501 -2.875907 -1.265549  
H 1.938495 -1.537799 -2.295050  
H 3.110872 -2.404912 -1.257902

PBN-alpha-2CH2OH.com.log  
30

C -3.893259 -1.060976 0.132735  
C -2.503516 -1.010158 0.039904  
C -1.846730 0.236212 -0.047598  
C -2.632332 1.410252 -0.036480  
C -4.017398 1.348274 0.056352  
C -4.656471 0.107853 0.141121  
H -4.384250 -2.028388 0.199872  
H -1.910079 -1.913255 0.034896  
H -2.141447 2.379197 -0.101210  
H -4.599735 2.265841 0.063205  
H -5.739490 0.055188 0.213818  
C -0.410220 0.416411 -0.150741  
H -0.048591 1.432433 -0.206905  
N 0.505640 -0.529257 -0.187685  
O 0.251248 -1.781384 -0.140303  
C 1.992139 -0.221798 -0.341393  
C 2.431493 -0.871642 -1.659873

H 3.483892 -0.640415 -1.844195  
H 2.295989 -1.953866 -1.609055  
H 1.835891 -0.489516 -2.496493  
C 2.283209 1.287264 -0.346667  
H 1.894286 1.751521 -1.263651  
H 1.814836 1.762264 0.523498  
C 2.731039 -0.885547 0.853481  
O 2.767790 -0.079214 2.018307  
H 3.432791 0.606440 1.840054  
H 3.743528 -1.148133 0.522640  
H 2.198058 -1.804317 1.102592  
O 3.705781 1.426569 -0.268962  
H 3.918561 2.365161 -0.382649

PBN-alpha-2COOH.com.log  
28

C -4.037309 -1.254908 0.001419  
C -2.657726 -1.088368 0.105000  
C -2.097215 0.205604 0.042886  
C -2.963510 1.308879 -0.123798  
C -4.337988 1.131210 -0.225089  
C -4.881833 -0.155170 -0.162824  
H -4.456002 -2.256665 0.050410  
H -2.000000 -1.936517 0.232697  
H -2.543526 2.310712 -0.174343  
H -4.986235 1.993887 -0.353025  
H -5.956362 -0.297295 -0.241826  
C -0.681458 0.509692 0.134287  
H -0.366121 1.540533 0.072802  
N 0.287654 -0.362918 0.287833  
O 0.146781 -1.635816 0.404886  
C 1.747578 0.010500 0.410870  
C 2.152631 -0.146480 1.886382  
H 1.665685 0.624463 2.490740  
H 1.835996 -1.135509 2.220599  
H 3.236300 -0.065029 1.986251  
C 2.483001 -1.042919 -0.456144  
O 3.333650 -1.794831 -0.056374  
O 2.084967 -0.953105 -1.741674  
H 2.563953 -1.648566 -2.230124  
C 2.152461 1.418507 -0.056780  
O 1.473992 2.420123 -0.085437  
O 3.464425 1.424523 -0.370865  
H 3.690421 2.343963 -0.610551

PBN-CH2CONH2-2b.com.log  
36

C 4.087011 -0.829028 -1.214924  
C 2.740988 -0.643378 -0.907132  
C 2.371027 -0.120940 0.350784  
C 3.390962 0.202543 1.273238  
C 4.730480 0.014709 0.955944  
C 5.084031 -0.502947 -0.293397  
H 4.358708 -1.233422 -2.186180  
H 1.967190 -0.897410 -1.616887  
H 3.120605 0.605289 2.246686  
H 5.498574 0.270521 1.680270  
H 6.130523 -0.651363 -0.545200  
C 1.009653 0.117238 0.796165  
H 0.886807 0.501874 1.797642  
N -0.098580 -0.077038 0.125432  
O -0.113454 -0.518671 -1.099837  
C -1.479427 0.185660 0.735879  
C -2.119274 -1.187155 1.113705  
H -2.851394 -0.998726 1.901974  
H -1.335259 -1.824508 1.542015  
C -1.380979 1.032160 2.015860  
H -0.852749 1.973795 1.849330  
H -2.396096 1.286605 2.331159

C -2.319159 0.929589 -0.331894  
H -2.432889 0.292860 -1.209547  
H -3.308560 1.106737 0.096702  
C -1.738301 2.291681 -0.726396  
O -2.046649 3.326654 -0.148439  
N -0.862930 2.245534 -1.773240  
H -0.351861 3.093280 -1.980820  
H -0.453030 1.352335 -2.029912  
C -2.900271 -1.988681 0.056105  
O -4.089395 -2.228806 0.220674  
N -2.172698 -2.466891 -0.992070  
H -2.700619 -2.906582 -1.734949  
H -1.292957 -2.006171 -1.223941  
H -0.911994 0.481534 2.838001

PBN-CH2COOMe-2.com.log  
40

C 4.584951 -1.129689 -1.359862  
C 3.238641 -0.868342 -1.111794  
C 2.767868 -0.788881 0.216488  
C 3.691254 -0.976743 1.268646  
C 5.031830 -1.235905 1.010314  
C 5.485916 -1.314498 -0.309513  
H 4.932947 -1.188010 -2.388001  
H 2.538280 -0.721871 -1.921803  
H 3.343809 -0.914998 2.297587  
H 5.723706 -1.376097 1.836552  
H 6.533673 -1.516879 -0.515325  
C 1.391868 -0.531433 0.599682  
H 1.170478 -0.484081 1.654556  
N 0.375527 -0.326141 -0.206948  
O 0.449278 -0.310854 -1.489213  
C -1.043306 -0.086565 0.321416  
C -1.857911 -1.244908 -0.302133  
H -1.690014 -1.244533 -1.384525  
H -1.463013 -2.201316 0.060395  
C -1.146948 -0.118866 1.849687  
H -0.851028 -1.094781 2.250168  
H -0.546670 0.667523 2.308557  
H -2.193319 0.047788 2.118841  
C -1.494058 1.265364 -0.271605  
H -2.526056 1.451151 0.042102  
H -1.493626 1.199803 -1.361618  
C -0.199145 4.711929 -0.429351  
H -0.429076 5.073340 0.576621  
H 0.878423 4.547350 -0.510560  
H -0.535634 5.427189 -1.180330  
O -0.915762 3.497675 -0.707820  
C -0.650715 2.464171 0.118811  
O 0.138092 2.536418 1.038730  
C -3.351307 -1.232473 -0.045054  
O -4.011888 -0.324092 0.418643  
O -3.888837 -2.408726 -0.429834  
C -5.314964 -2.519210 -0.278831  
H -5.568177 -3.517223 -0.636912  
H -5.600022 -2.402316 0.769965  
H -5.824260 -1.756117 -0.873102

PBN-CH2NHCOMe-2.com.log  
42

C -5.041775 1.070485 -0.838527  
C -3.689129 0.893322 -0.554154  
C -3.252050 -0.282721 0.092534  
C -4.214193 -1.258601 0.435773  
C -5.560494 -1.072241 0.146961  
C -5.981119 0.097156 -0.493129  
H -5.364074 1.980693 -1.337393  
H -2.959059 1.643453 -0.821836  
H -3.892401 -2.170981 0.932987

H -6.282255 -1.837333 0.419541  
H -7.033167 0.246261 -0.720753  
C -1.876176 -0.584068 0.443680  
H -1.688688 -1.527614 0.933175  
N -0.817814 0.165543 0.227786  
O -0.863258 1.314784 -0.360348  
C 0.582630 -0.286966 0.614317  
C 1.253109 0.886436 1.384814  
H 2.200857 0.524661 1.787367  
H 0.607469 1.158245 2.228112  
C 0.582133 -1.514052 1.532309  
H 0.005308 -1.336648 2.446404  
H 0.208101 -2.408089 1.027371  
C 1.309101 -0.595325 -0.723535  
H 1.211101 0.274506 -1.378079  
H 0.823099 -1.449464 -1.201009  
N 2.704738 -0.936262 -0.547341  
H 3.348871 -0.181960 -0.317095  
C 3.150791 -2.226994 -0.629530  
O 2.404768 -3.181263 -0.829627  
C 4.655082 -2.397306 -0.477754  
H 5.076744 -2.692375 -1.444849  
H 5.163706 -1.491598 -0.134143  
H 4.849022 -3.213199 0.224105  
N 1.553979 2.081260 0.620082  
H 0.742987 2.529416 0.210775  
C 2.796157 2.361360 0.143323  
O 3.782192 1.648613 0.362527  
C 2.914669 3.639304 -0.668215  
H 1.958466 4.145906 -0.826743  
H 3.595844 4.321320 -0.149053  
H 3.366009 3.404504 -1.636867  
H 1.613703 -1.729283 1.820686

PBN-CH2OCOMe-2.com.log

40

C -3.865450 -2.543252 0.146149  
C -2.591465 -1.979420 0.179731  
C -2.429782 -0.590039 -0.010417  
C -3.581724 0.198562 -0.228175  
C -4.847297 -0.374247 -0.259600  
C -4.994520 -1.751907 -0.073264  
H -3.975592 -3.613990 0.296366  
H -1.716673 -2.588376 0.357692  
H -3.472595 1.271579 -0.368608  
H -5.719361 0.252013 -0.426760  
H -5.982958 -2.202864 -0.096279  
C -1.161004 0.114781 -0.003669  
H -1.185162 1.188923 -0.110241  
N 0.031149 -0.414063 0.168972  
O 0.252699 -1.662271 0.385622  
C 1.305698 0.416479 0.168363  
C 2.334551 -0.367260 -0.707690  
H 3.011388 0.356172 -1.178089  
H 1.806508 -0.901022 -1.498575  
C 1.150446 1.796273 -0.500744  
H 0.737274 1.690455 -1.512960  
H 2.153835 2.224484 -0.581014  
C 1.770313 0.550740 1.623310  
H 1.824616 -0.437991 2.078659  
H 1.072958 1.179508 2.181770  
O 3.165291 -1.223291 0.060114  
O 0.317139 2.658518 0.280190  
C 3.181059 -2.591320 -0.060676  
O 3.815898 -3.210517 0.754368  
C 0.259131 4.012609 0.056755  
O -0.527005 4.657844 0.699908  
C 1.199312 4.603624 -0.973632  
H 2.244179 4.497039 -0.659771  
H 1.094278 4.118556 -1.949914

H 0.966423 5.664132 -1.069142  
C 2.457036 -3.227046 -1.227338  
H 1.380356 -3.056268 -1.139077  
H 2.801496 -2.821925 -2.185986  
H 2.663960 -4.297170 -1.198749  
H 2.767031 1.001453 1.661620

PBN-CH2OCONHMe-2.com.log

44

C -4.519845 -2.367881 -1.011054  
C -3.233795 -2.099775 -0.545690  
C -2.931637 -0.833538 -0.000999  
C -3.953491 0.141092 0.053253  
C -5.231494 -0.137434 -0.416451  
C -5.521083 -1.396506 -0.950994  
H -4.740791 -3.348020 -1.425883  
H -2.454570 -2.847451 -0.590722  
H -3.726338 1.122060 0.464171  
H -6.003289 0.626035 -0.366208  
H -6.520077 -1.616906 -1.317969  
C -1.638991 -0.431516 0.522786  
H -1.571559 0.560879 0.943442  
N -0.537483 -1.149125 0.531019  
O -0.436389 -2.346107 0.069261  
C 0.757225 -0.633989 1.143127  
C 0.764446 0.861356 1.479677  
H 1.721135 1.074489 1.962365  
H -0.043050 1.138425 2.158704  
C 0.992959 -1.432269 2.434445  
H 0.281533 -1.132980 3.211651  
H 0.856301 -2.495643 2.225953  
H 2.009283 -1.263531 2.799392  
C 1.843442 -0.950295 0.091446  
H 1.613104 -0.429280 -0.843690  
H 1.855432 -2.029294 -0.080097  
C 4.231101 -0.494353 -0.131216  
O 5.227850 0.050350 0.292498  
O 3.088638 -0.490354 0.624445  
N 4.144618 -1.106536 -1.354418  
H 3.384334 -1.747268 -1.528392  
C 5.349767 -1.272870 -2.154626  
H 5.987543 -2.087815 -1.787836  
H 5.062870 -1.479880 -3.189101  
H 5.925398 -0.346983 -2.118183  
O 0.707577 1.676157 0.297310  
C -0.245789 2.655584 0.250942  
O -1.144146 2.787167 1.068988  
N -0.045771 3.430985 -0.841979  
H 0.764663 3.226758 -1.408667  
C -0.907579 4.547770 -1.180803  
H -0.355156 5.494474 -1.161868  
H -1.350931 4.415384 -2.174382  
H -1.705041 4.589311 -0.438109

PBN-CH2OMe-2.com.log

36

C -4.403161 -0.011797 -1.321827  
C -3.029008 -0.007988 -1.088813  
C -2.536962 0.002826 0.234237  
C -3.468330 0.009559 1.296508  
C -4.836434 0.005820 1.052855  
C -5.311616 -0.004976 -0.261847  
H -4.766718 -0.020287 -2.346161  
H -2.322927 -0.013304 -1.907012  
H -3.104784 0.017859 2.321918  
H -5.533302 0.011208 1.886768  
H -6.380880 -0.008091 -0.455929  
C -1.132780 0.007680 0.601663  
H -0.893894 0.014315 1.654293

N -0.102813 0.003526 -0.218419  
O -0.189106 -0.006727 -1.499293  
C 1.331047 0.009101 0.288201  
C 1.922764 1.327072 -0.260884  
H 1.850403 1.324180 -1.356263  
H 1.312422 2.168499 0.114051  
C 1.456871 -0.042317 1.809757  
H 1.000183 0.833358 2.282756  
H 1.013000 -0.953062 2.224675  
H 2.519905 -0.043313 2.052406  
C 1.968370 -1.248528 -0.356137  
H 2.077844 -1.092740 -1.436869  
H 1.280485 -2.100218 -0.212818  
C 3.861796 -2.627760 -0.326156  
H 4.070530 -2.465887 -1.395646  
H 4.807680 -2.758670 0.205666  
H 3.263361 -3.548409 -0.227025  
O 3.212066 -1.516674 0.252431  
O 3.259296 1.456332 0.168161  
C 3.867512 2.633092 -0.319898  
H 4.893783 2.643007 0.055819  
H 3.887412 2.654405 -1.421141  
H 3.346727 3.538314 0.033094

PBN-CH2POOMe2-2.com.log  
50

C -5.675255 -0.422843 0.489005  
C -4.302952 -0.414327 0.733280  
C -3.409432 -0.917703 -0.236837  
C -3.942642 -1.423274 -1.443316  
C -5.312004 -1.421426 -1.679235  
C -6.186797 -0.918997 -0.711348  
H -6.351291 -0.036021 1.247086  
H -3.904217 -0.034894 1.663452  
H -3.266950 -1.816395 -2.199490  
H -5.698630 -1.812125 -2.616558  
H -7.258227 -0.916495 -0.892838  
C -1.965539 -0.982719 -0.091787  
N -1.249284 -0.490730 0.894163  
O -1.742523 0.160946 1.886510  
C 0.279242 -0.693611 1.004208  
C 0.455561 -1.574788 2.254709  
H 1.512974 -1.668296 2.503557  
H -0.087141 -1.128674 3.089948  
H 0.056093 -2.578418 2.071283  
C 0.840095 -1.377792 -0.261200  
H 0.424694 -2.387189 -0.352574  
H 0.550475 -0.807083 -1.150388  
C 0.888695 0.701568 1.278419  
H 1.969294 0.592388 1.398231  
H 0.473074 1.086408 2.211604  
H -1.417227 -1.476734 -0.877752  
P 0.645179 1.995867 0.003767  
O 1.967901 2.883710 0.279535  
O -0.496508 3.016866 0.521211  
C -1.867217 2.893347 0.087241  
H -2.367381 2.130870 0.688485  
H -2.328110 3.869188 0.253582  
H -1.910957 2.636337 -0.974298  
C 2.116280 4.147584 -0.390475  
H 2.009525 4.026342 -1.473175  
H 1.374466 4.861853 -0.022378  
H 3.121816 4.502228 -0.157670  
O 0.437344 1.510236 -1.393388  
P 2.634279 -1.628351 -0.523281  
O 2.904780 -2.506868 -1.690236  
O 3.342294 -0.171698 -0.599548  
O 3.165534 -2.144757 0.914199  
C 4.547071 -2.538087 1.034470  
H 4.654790 -2.981275 2.025693

|   |          |           |           |
|---|----------|-----------|-----------|
| H | 4.802330 | -3.273021 | 0.266140  |
| H | 5.196638 | -1.662198 | 0.945270  |
| C | 3.596018 | 0.442694  | -1.884659 |
| H | 3.967229 | -0.301793 | -2.592616 |
| H | 2.678036 | 0.904856  | -2.255497 |
| H | 4.354487 | 1.207286  | -1.706641 |

PBN-CH2SMe-2.com.log

36

|   |           |           |           |
|---|-----------|-----------|-----------|
| C | -4.928346 | -1.148591 | 0.179404  |
| C | -3.543416 | -1.044077 | 0.296622  |
| C | -2.888266 | 0.141474  | -0.100303 |
| C | -3.670751 | 1.200828  | -0.611766 |
| C | -5.050927 | 1.086058  | -0.724962 |
| C | -5.688089 | -0.093398 | -0.328404 |
| H | -5.418065 | -2.067884 | 0.489968  |
| H | -2.953235 | -1.859379 | 0.689604  |
| H | -3.181372 | 2.121666  | -0.922301 |
| H | -5.630975 | 1.914909  | -1.121806 |
| H | -6.767291 | -0.186853 | -0.415058 |
| C | -1.455903 | 0.370642  | -0.027874 |
| H | -1.098397 | 1.331623  | -0.362802 |
| N | -0.543614 | -0.474414 | 0.405062  |
| O | -0.804891 | -1.650398 | 0.830345  |
| C | 0.971492  | -0.117498 | 0.465709  |
| C | 1.628655  | -1.191664 | -0.435643 |
| H | 1.065333  | -2.116279 | -0.296220 |
| H | 1.553371  | -0.881227 | -1.484636 |
| C | 1.208174  | 1.316567  | -0.047800 |
| H | 0.840450  | 1.413735  | -1.074893 |
| H | 0.657484  | 2.017764  | 0.588263  |
| C | 1.342275  | -0.256560 | 1.949108  |
| H | 1.103566  | -1.261754 | 2.297530  |
| H | 0.774890  | 0.468312  | 2.543582  |
| S | 3.395879  | -1.538673 | -0.051045 |
| S | 2.972334  | 1.865293  | -0.029555 |
| C | 3.709356  | -2.719126 | -1.407549 |
| H | 4.743833  | -3.055975 | -1.301673 |
| H | 3.045702  | -3.586695 | -1.338336 |
| H | 3.591797  | -2.242207 | -2.385727 |
| C | 2.658745  | 3.663373  | -0.150644 |
| H | 2.099730  | 4.033833  | 0.714816  |
| H | 3.637719  | 4.149593  | -0.171141 |
| H | 2.124410  | 3.918358  | -1.071426 |
| H | 2.406076  | -0.061558 | 2.098283  |

PBN-CONH2-2.com.log

30

|   |           |           |           |
|---|-----------|-----------|-----------|
| C | -4.000896 | -1.151149 | 0.537946  |
| C | -2.627859 | -0.946322 | 0.423048  |
| C | -2.138986 | 0.255632  | -0.133019 |
| C | -3.069481 | 1.228505  | -0.562319 |
| C | -4.436882 | 1.013915  | -0.443085 |
| C | -4.908466 | -0.180563 | 0.108891  |
| H | -4.364919 | -2.080164 | 0.968205  |
| H | -1.923016 | -1.694284 | 0.755649  |
| H | -2.706677 | 2.159309  | -0.992111 |
| H | -5.134941 | 1.775363  | -0.779202 |
| H | -5.977234 | -0.352118 | 0.203588  |
| C | -0.739190 | 0.594199  | -0.308966 |
| H | -0.519544 | 1.556947  | -0.744804 |
| N | 0.305120  | -0.135876 | 0.001901  |
| O | 0.201147  | -1.318875 | 0.547860  |
| C | 1.722352  | 0.360570  | -0.218653 |
| C | 1.794208  | 1.671550  | -1.002467 |
| H | 1.312931  | 1.571741  | -1.980542 |
| H | 1.359736  | 2.502152  | -0.442560 |
| H | 2.850047  | 1.889861  | -1.156438 |
| C | 2.381974  | 0.589806  | 1.194894  |



N 2.358373 -0.491516 2.014902  
H 2.667103 -0.338645 2.966192  
H 1.666254 -1.211811 1.821619  
O 2.900828 1.657805 1.468421  
C 2.596828 -0.683139 -0.999619  
O 3.731802 -0.356477 -1.309929  
N 2.023353 -1.863513 -1.341874  
H 2.644079 -2.547945 -1.754076  
H 1.206424 -2.171709 -0.820768

PBN-COOMe-2.com.log

34

C -4.493178 -1.071575 0.063719  
C -3.117268 -0.945503 0.245604  
C -2.485226 0.294329 0.009663  
C -3.278077 1.385745 -0.409451  
C -4.649550 1.249003 -0.587280  
C -5.264489 0.016022 -0.350642  
H -4.967117 -2.031974 0.249269  
H -2.516206 -1.784063 0.567759  
H -2.802773 2.346149 -0.594882  
H -5.240159 2.102164 -0.910151  
H -6.336879 -0.094176 -0.488434  
C -1.065674 0.553556 0.163249  
H -0.693278 1.546824 -0.038701  
N -0.156788 -0.317291 0.537087  
O -0.373733 -1.545845 0.847968  
C 1.307407 0.020369 0.719368  
C 1.581505 0.111028 2.229741  
H 2.656040 0.176590 2.409609  
H 1.082149 0.990492 2.647035  
H 1.195621 -0.793745 2.701699  
C 3.786492 2.362126 -0.712226  
H 3.358314 2.615287 -1.684864  
H 3.671609 3.211271 -0.034294  
H 4.835355 2.084454 -0.810923  
C 1.815715 1.312610 0.051903  
O 1.188607 2.323763 -0.177369  
O 3.135332 1.196548 -0.169016  
C 2.055335 -1.195062 0.113322  
O 2.828589 -1.896886 0.715123  
O 1.754040 -1.311511 -1.190284  
C 2.336835 -2.445950 -1.854587  
H 1.989912 -3.371143 -1.387871  
H 1.995574 -2.385438 -2.888060  
H 3.427689 -2.400396 -1.802462

PBN-NHCOMe-2b.com.log

36

C 4.171537 -1.571466 -0.563109  
C 2.822492 -1.300614 -0.342076  
C 2.425328 -0.030519 0.127505  
C 3.422134 0.942062 0.360582  
C 4.764827 0.661755 0.136744  
C 5.146642 -0.600403 -0.327410  
H 4.462616 -2.554351 -0.924489  
H 2.064897 -2.050169 -0.524068  
H 3.130432 1.926246 0.721351  
H 5.514603 1.426062 0.323246  
H 6.195589 -0.822869 -0.503923  
C 1.053030 0.356702 0.395892  
H 0.865172 1.358890 0.754876  
N -0.017491 -0.391007 0.249111  
O -0.045452 -1.593891 -0.157281  
C -1.437004 0.150159 0.700197  
N -1.450377 1.603217 0.644820  
H -1.543449 2.081324 1.529925  
C -1.521146 2.347037 -0.509957  
O -1.510029 1.837871 -1.624279

C -1.609105 3.850686 -0.315151  
H -1.539957 4.169551 0.729264  
H -0.805677 4.323393 -0.887576  
H -2.557613 4.203699 -0.732144  
N -2.390349 -0.390812 -0.218048  
H -2.253696 -0.011078 -1.150657  
C -2.993789 -1.639885 -0.143566  
O -3.147084 -2.274993 0.884922  
C -3.493239 -2.132792 -1.491848  
H -2.642445 -2.529984 -2.058176  
H -4.217521 -2.932551 -1.331562  
H -3.950185 -1.332357 -2.084233  
C -1.609459 -0.292615 2.152066  
H -0.879113 0.241418 2.770405  
H -2.622641 -0.074769 2.498125  
H -1.446466 -1.364761 2.232342

PBN-OCOMe-2.com.log

34

C -4.497023 -1.133544 0.062232  
C -3.114936 -0.981963 0.151559  
C -2.537828 0.299997 0.028244  
C -3.387399 1.407345 -0.185982  
C -4.764640 1.244405 -0.274496  
C -5.325911 -0.029934 -0.150148  
H -4.930268 -2.125468 0.159626  
H -2.468195 -1.832644 0.315999  
H -2.953096 2.399536 -0.283492  
H -5.401437 2.109049 -0.440162  
H -6.402616 -0.160059 -0.218742  
C -1.116792 0.578575 0.108731  
H -0.779797 1.599682 0.004529  
N -0.162631 -0.303217 0.291517  
O -0.298654 -1.571030 0.430838  
C 1.312255 0.119820 0.398354  
C 1.724739 -0.051269 1.855131  
H 1.236878 0.739940 2.432282  
H 1.397417 -1.025764 2.213211  
H 2.805516 0.014602 1.973393  
C 2.343778 -1.984729 -0.334377  
O 2.847726 -2.357380 0.690040  
O 1.960568 -0.661152 -0.573659  
C 2.110635 -2.799795 -1.574495  
H 1.029216 -2.922934 -1.694905  
H 2.487889 -2.276260 -2.458325  
H 2.590455 -3.773863 -1.472599  
O 1.360500 1.453626 -0.037755  
C 2.491016 2.218874 -0.291784  
O 2.298179 3.323976 -0.721083  
C 3.858325 1.655779 0.012003  
H 4.048611 1.715114 1.089409  
H 3.962418 0.615698 -0.297715  
H 4.591542 2.280206 -0.500011

PBN-OCONHMe-2.com.log

38

C 4.615812 -1.483295 -0.569026  
C 3.271601 -1.290464 -0.258151  
C 2.806286 -0.003219 0.084339  
C 3.725004 1.068746 0.100803  
C 5.063678 0.865184 -0.212735  
C 5.514703 -0.414612 -0.548616  
H 4.964228 -2.478971 -0.830595  
H 2.570199 -2.113001 -0.272998  
H 3.372807 2.064643 0.357732  
H 5.755823 1.702536 -0.196425  
H 6.561061 -0.576442 -0.793656  
C 1.434826 0.318684 0.431028  
H 1.194382 1.340816 0.690881

N 0.419422 -0.507695 0.448016  
O 0.452951 -1.770788 0.169579  
C -0.988610 -0.026381 0.832317  
C -1.426662 -0.778951 2.080681  
H -1.248959 -1.847289 1.967066  
H -0.846167 -0.403387 2.926484  
H -2.486479 -0.584859 2.264711  
C -1.170882 2.355135 0.188238  
O -0.253434 3.101946 -0.075873  
O -0.986901 1.334614 1.150550  
N -2.449376 2.459727 -0.231604  
H -3.046816 1.651613 -0.103777  
C -2.810013 3.425772 -1.259036  
H -2.586541 3.056047 -2.267963  
H -3.879355 3.638240 -1.185374  
H -2.246261 4.344652 -1.091792  
O -1.753421 -0.239019 -0.319790  
C -2.775112 -1.208192 -0.374837  
O -3.937006 -0.856007 -0.324732  
N -2.265123 -2.434095 -0.561937  
H -1.244499 -2.488869 -0.510115  
C -3.094428 -3.618501 -0.688762  
H -4.138353 -3.303615 -0.727992  
H -2.848474 -4.160771 -1.607943  
H -2.955783 -4.292299 0.165105

PBN-OMe-2.com.log

30

C -3.798167 -1.076376 -0.120248  
C -2.408815 -0.988606 -0.185354  
C -1.772507 0.262618 -0.034538  
C -2.576108 1.404107 0.181314  
C -3.960795 1.305232 0.244814  
C -4.579700 0.060604 0.094007  
H -4.274674 -2.046177 -0.238601  
H -1.798810 -1.865495 -0.351831  
H -2.098399 2.374208 0.299188  
H -4.559103 2.197048 0.411588  
H -5.662384 -0.020086 0.143243  
C -0.338552 0.474436 -0.084256  
H 0.045982 1.475200 0.043226  
N 0.578044 -0.450222 -0.271397  
O 0.368829 -1.699781 -0.445499  
C 2.073705 -0.086040 -0.321091  
C 2.554870 -0.312994 -1.748000  
H 3.645515 -0.259188 -1.788061  
H 2.236707 -1.308714 -2.060050  
H 2.123384 0.439000 -2.414535  
C 2.324488 -1.074177 1.846793  
H 1.374527 -1.616595 1.876431  
H 3.092409 -1.650977 2.365759  
H 2.217442 -0.093327 2.322809  
O 2.780069 -0.953018 0.495511  
O 2.153650 1.247461 0.117890  
C 3.455648 1.828494 0.078083  
H 3.765156 2.052364 -0.950186  
H 3.385652 2.761614 0.640977  
H 4.195499 1.171596 0.547449

PBN-POOMe2-2.com.log

44

C 5.022406 -1.147686 0.746288  
C 3.661855 -0.983142 0.495404  
C 3.228221 -0.005112 -0.425460  
C 4.199636 0.790599 -1.072230  
C 5.553778 0.620285 -0.811308  
C 5.971924 -0.352792 0.101163  
H 5.343041 -1.906439 1.455313  
H 2.923992 -1.596246 0.993158

H 3.878455 1.548897 -1.782547  
H 6.284039 1.244607 -1.318896  
H 7.030354 -0.489121 0.306378  
C 1.845110 0.250225 -0.775498  
N 0.785291 -0.348544 -0.277153  
O 0.798631 -1.245208 0.642040  
C -0.601856 0.027227 -0.728176  
C -0.678759 0.246123 -2.252540  
H -0.139772 1.145603 -2.555907  
H -0.270820 -0.628522 -2.766903  
H -1.722083 0.363107 -2.552486  
H 1.639914 1.024927 -1.500773  
P -1.658698 -1.477832 -0.303488  
O -3.049689 -0.885042 -0.903585  
O -2.040028 -1.497683 1.257697  
C -1.322992 -2.299989 2.216878  
H -2.053611 -2.582788 2.978411  
H -0.907635 -3.190637 1.741028  
H -0.519906 -1.703854 2.650327  
C -4.219484 -1.718027 -0.840726  
H -4.556047 -1.819323 0.195456  
H -4.989307 -1.217976 -1.431716  
H -4.011572 -2.705009 -1.264665  
O -1.213721 -2.749961 -0.923771  
P -1.016993 1.637853 0.136307  
O -0.397521 2.796227 -0.563183  
O -0.540457 1.323383 1.632927  
O -2.614700 1.749079 0.324629  
C -3.441643 2.387053 -0.665317  
H -2.901225 3.199251 -1.158410  
H -3.767892 1.642382 -1.396236  
H -4.308779 2.785278 -0.134614  
C -0.573239 2.374292 2.618417  
H -1.608928 2.608536 2.881357  
H -0.045770 1.987426 3.491069  
H -0.068000 3.268676 2.243055

PBN-SMe-2b.com.log

30

C -4.231874 0.975055 -0.193710  
C -2.839664 1.004647 -0.248784  
C -2.101949 -0.190375 -0.104176  
C -2.809616 -1.397433 0.093895  
C -4.197840 -1.415008 0.147197  
C -4.917455 -0.224958 0.003322  
H -4.786246 1.903099 -0.306540  
H -2.306632 1.932340 -0.400905  
H -2.254716 -2.326541 0.204060  
H -4.720284 -2.355558 0.299958  
H -6.003347 -0.235324 0.044253  
C -0.655606 -0.287183 -0.140825  
H -0.210320 -1.262059 0.003393  
N 0.194328 0.704970 -0.329965  
O -0.134221 1.924907 -0.487803  
C 1.706950 0.455344 -0.299247  
S 2.338953 0.759082 1.412994  
C 1.480418 -0.502245 2.412035  
H 0.412330 -0.288332 2.495186  
H 1.636623 -1.502636 1.999509  
H 1.932315 -0.450372 3.406526  
S 2.027861 -1.265939 -0.956240  
C 3.848228 -1.367613 -0.839650  
H 4.094968 -2.421996 -0.990576  
H 4.338711 -0.772989 -1.613888  
H 4.187787 -1.054568 0.150605  
C 2.372576 1.505750 -1.189928  
H 1.995357 1.413259 -2.211316  
H 2.148479 2.507579 -0.823603  
H 3.454401 1.353885 -1.193313

PBN-alpha-3CH2OH.com.log

31

|   |           |           |           |
|---|-----------|-----------|-----------|
| C | 3.938198  | -1.234266 | 0.335132  |
| C | 2.550390  | -1.114497 | 0.289851  |
| C | 1.958903  | 0.095420  | -0.133204 |
| C | 2.805871  | 1.164864  | -0.500371 |
| C | 4.188685  | 1.035458  | -0.449709 |
| C | 4.762637  | -0.168619 | -0.031062 |
| H | 4.379582  | -2.172150 | 0.662690  |
| H | 1.907730  | -1.935046 | 0.575986  |
| H | 2.362935  | 2.102781  | -0.827240 |
| H | 4.820245  | 1.872146  | -0.736470 |
| H | 5.843713  | -0.273129 | 0.009457  |
| C | 0.531981  | 0.341252  | -0.232518 |
| H | 0.199133  | 1.325007  | -0.534254 |
| N | -0.428723 | -0.506155 | 0.065858  |
| O | -0.250589 | -1.691392 | 0.534579  |
| C | -1.893960 | -0.139173 | -0.112058 |
| C | -2.146848 | 1.165643  | -0.902406 |
| H | -3.234354 | 1.227011  | -1.042361 |
| H | -1.698416 | 1.070805  | -1.898244 |
| C | -2.501510 | -1.313026 | -0.916746 |
| H | -1.987039 | -1.368063 | -1.888651 |
| H | -2.306664 | -2.242697 | -0.375215 |
| C | -2.529660 | -0.112344 | 1.284851  |
| O | -2.071766 | 1.051506  | 1.986710  |
| H | -2.482059 | 1.060898  | 2.863877  |
| H | -2.230288 | -1.024852 | 1.812646  |
| H | -3.619084 | -0.097686 | 1.164010  |
| O | -3.896124 | -1.068476 | -1.080691 |
| H | -4.286859 | -1.859378 | -1.480531 |
| O | -1.634706 | 2.360223  | -0.337497 |
| H | -1.830162 | 2.318280  | 0.617932  |

PBN-alpha-3COOH.com.log

28

|   |           |           |           |
|---|-----------|-----------|-----------|
| C | 4.287370  | -1.267505 | -0.049852 |
| C | 2.904586  | -1.097705 | -0.056093 |
| C | 2.355040  | 0.202334  | -0.040325 |
| C | 3.233667  | 1.308220  | -0.016759 |
| C | 4.611107  | 1.126719  | -0.009784 |
| C | 5.144546  | -0.165482 | -0.026855 |
| H | 4.698570  | -2.273385 | -0.061921 |
| H | 2.236973  | -1.947609 | -0.071407 |
| H | 2.821239  | 2.314320  | -0.004076 |
| H | 5.269878  | 1.990651  | 0.008706  |
| H | 6.221580  | -0.310391 | -0.021435 |
| C | 0.938817  | 0.508056  | -0.045895 |
| H | 0.628160  | 1.542169  | -0.020316 |
| N | -0.038905 | -0.367807 | -0.088062 |
| O | 0.079183  | -1.646110 | -0.093306 |
| C | -1.486572 | 0.037643  | -0.017177 |
| C | -2.208732 | -1.114445 | -0.782239 |
| O | -2.149319 | -1.239446 | -1.976357 |
| O | -2.926832 | -1.891594 | 0.044068  |
| H | -3.316026 | -2.597071 | -0.507087 |
| C | -1.873065 | 0.094106  | 1.484857  |
| O | -1.152709 | -0.210497 | 2.396434  |
| O | -3.126650 | 0.571458  | 1.624348  |
| H | -3.319678 | 0.569003  | 2.581442  |
| C | -1.849669 | 1.402568  | -0.647136 |
| O | -1.187677 | 2.411486  | -0.556963 |
| O | -3.045420 | 1.356983  | -1.248231 |
| H | -3.235533 | 2.261675  | -1.563868 |

PBN-CH2CONH2-3.com.log

40

C -4.060021 -1.769440 -0.349524  
C -2.710248 -1.431026 -0.273792  
C -2.327162 -0.076697 -0.167032  
C -3.338465 0.909318 -0.143493  
C -4.681357 0.560940 -0.219230  
C -5.048497 -0.784038 -0.321897  
H -4.340957 -2.816010 -0.432474  
H -1.942311 -2.190673 -0.299614  
H -3.057119 1.956985 -0.066590  
H -5.442475 1.336016 -0.199500  
H -6.097825 -1.059856 -0.381943  
C -0.959928 0.403730 -0.075608  
H -0.826598 1.471856 -0.000190  
N 0.133600 -0.319877 -0.065265  
O 0.143045 -1.612851 -0.120160  
C 1.528798 0.271812 0.086015  
C 2.369176 -0.203323 -1.131884  
H 3.328606 0.321336 -1.073176  
H 1.873190 0.139042 -2.041588  
C 1.537451 1.815048 0.177818  
H 1.071654 2.121769 1.120007  
H 2.593249 2.099970 0.273264  
C 2.085591 -0.295571 1.426332  
H 2.306610 -1.353915 1.301613  
H 3.025909 0.215722 1.648046  
C 1.135635 -0.061024 2.600528  
O 1.116906 0.987615 3.239485  
N 0.317226 -1.118400 2.876820  
H -0.431333 -0.951577 3.537035  
H 0.160713 -1.811584 2.151870  
C 2.730248 -1.690327 -1.198521  
O 3.589030 -2.180018 -0.476549  
N 2.129974 -2.396006 -2.213342  
H 2.268468 -3.398231 -2.150853  
H 1.188715 -2.119516 -2.462944  
C 0.981357 2.625862 -0.996822  
O 0.965873 2.250961 -2.160339  
N 0.483805 3.848266 -0.625525  
H 0.253268 4.497377 -1.366405  
H 0.641702 4.226170 0.297797

PBN-CH2COOMe-3.com.log

46

C 5.424098 -1.066015 -0.891654  
C 4.049771 -0.834944 -0.880126  
C 3.371042 -0.676243 0.347029  
C 4.117919 -0.756120 1.543279  
C 5.488063 -0.986533 1.520549  
C 6.149116 -1.143367 0.298845  
H 5.933429 -1.185427 -1.844399  
H 3.486126 -0.771659 -1.799892  
H 3.609408 -0.631967 2.496875  
H 6.041729 -1.042673 2.453918  
H 7.220712 -1.322906 0.277137  
C 1.946118 -0.438274 0.489243  
H 1.566376 -0.323701 1.492097  
N 1.067397 -0.325335 -0.479972  
O 1.349207 -0.413386 -1.728514  
C -0.441922 -0.112851 -0.219122  
C -1.060576 -1.395516 -0.829908  
H -0.632514 -1.511177 -1.832738  
H -0.724774 -2.265062 -0.255113  
C -0.748437 0.008457 1.293755  
H -0.520726 -0.936108 1.795016  
H -0.135220 0.810592 1.707923  
C -0.835583 1.144013 -1.017080  
H -1.921535 1.246189 -1.023925  
H -0.514280 1.002634 -2.052903  
C -0.181934 4.765134 -0.893050  
H -0.473826 5.005466 0.132595

H 0.908033 4.797208 -0.971127  
H -0.638035 5.463528 -1.595251  
O -0.677579 3.468748 -1.265261  
C -0.229470 2.440866 -0.518156  
O 0.555654 2.576531 0.398258  
C -2.566892 -1.477139 -0.967465  
O -3.358405 -0.556389 -0.995380  
O -2.932499 -2.766643 -1.120985  
C -4.333093 -2.992998 -1.352907  
H -4.433237 -4.068793 -1.498082  
H -4.921696 -2.666414 -0.491513  
H -4.669032 -2.450642 -2.240357  
C -2.187697 0.394544 1.596825  
O -2.638301 1.513250 1.488854  
O -2.899393 -0.664267 2.040712  
C -4.288153 -0.392558 2.305377  
H -4.789408 -0.096782 1.380722  
H -4.699249 -1.326475 2.690296  
H -4.387752 0.406023 3.044460

PBN-CH2NHCOMe-3.com.log

49

C -5.329566 0.559368 -1.059935  
C -3.954004 0.417503 -0.890618  
C -3.449643 -0.572514 -0.020240  
C -4.367006 -1.402786 0.661249  
C -5.736994 -1.252927 0.484834  
C -6.224591 -0.267872 -0.378751  
H -5.705164 1.324967 -1.733430  
H -3.258419 1.053181 -1.419202  
H -3.992690 -2.171278 1.333836  
H -6.424789 -1.902530 1.018819  
H -7.295339 -0.147938 -0.519263  
C -2.043382 -0.818197 0.243505  
H -1.809492 -1.614629 0.934718  
N -1.013531 -0.184624 -0.265975  
O -1.119102 0.788160 -1.120759  
C 0.428329 -0.507555 0.094484  
C 0.945179 0.584520 1.066840  
H 2.039392 0.536579 1.076802  
H 0.604410 0.338562 2.083704  
C 0.560015 -1.883915 0.815916  
H -0.034551 -1.884044 1.735902  
H 0.209266 -2.688972 0.165051  
C 1.203947 -0.580473 -1.255804  
H 0.546604 -1.026124 -2.006892  
H 2.058012 -1.240304 -1.123882  
N 1.737686 0.664290 -1.755718  
H 1.074131 1.337859 -2.109280  
C 3.040807 1.019732 -1.543324  
O 3.842936 0.287779 -0.967233  
C 3.441830 2.387309 -2.070481  
H 2.659103 2.877804 -2.657233  
H 3.706530 3.028108 -1.223013  
H 4.337143 2.276363 -2.688791  
N 0.530067 1.937759 0.746269  
H -0.183329 2.044645 0.031496  
N 1.930479 -2.202631 1.158258  
H 2.403247 -1.629530 1.843061  
C 2.679322 -3.102522 0.430244  
O 2.190683 -3.776410 -0.466691  
C 0.921824 2.969420 1.546122  
O 1.684449 2.808369 2.494456  
C 0.357326 4.335048 1.180815  
H -0.290404 4.321056 0.298704  
H -0.210029 4.722869 2.032791  
H 1.187782 5.025477 1.003476  
C 4.150464 -3.139264 0.796980  
H 4.583698 -4.075096 0.441155  
H 4.650615 -2.300589 0.297010

H 4.316505 -3.042432 1.875437

PBN-CH2OCOCH3-3b.com.log

46

C -5.098522 -1.265289 0.800807  
C -3.744004 -1.087668 0.526968  
C -3.269777 0.173608 0.106049  
C -4.193902 1.234625 -0.022521  
C -5.542414 1.046072 0.254009  
C -6.001085 -0.208432 0.666642  
H -5.451033 -2.240643 1.125435  
H -3.041070 -1.901023 0.636747  
H -3.840042 2.212721 -0.339809  
H -6.236086 1.875763 0.150298  
H -7.055030 -0.358668 0.884413  
C -1.889820 0.483640 -0.216439  
H -1.654198 1.503321 -0.484614  
N -0.869021 -0.345084 -0.176071  
O -0.934471 -1.580696 0.193088  
C 0.539169 0.079316 -0.524316  
C 1.133308 -1.023470 -1.456084  
H 1.862069 -0.562170 -2.128593  
H 0.334988 -1.460683 -2.057111  
C 0.642543 1.412771 -1.293067  
H 0.013330 1.382293 -2.191176  
H 1.680768 1.521072 -1.601981  
C 1.293284 0.159331 0.819034  
H 1.263921 -0.815477 1.299192  
H 0.806200 0.902204 1.458312  
O 1.858462 -2.005375 -0.727832  
O 0.229143 2.525613 -0.501254  
C 1.445128 -3.300472 -0.544673  
O 1.989738 -3.929118 0.329740  
C 1.019639 3.632725 -0.257887  
O 0.550430 4.494841 0.437394  
C 2.400851 3.688823 -0.872719  
H 3.033238 2.873935 -0.504376  
H 2.359624 3.626282 -1.966068  
H 2.842377 4.644675 -0.590371  
C 0.404228 -3.868340 -1.479504  
H -0.562136 -3.394123 -1.284919  
H 0.674581 -3.705390 -2.528772  
H 0.331010 -4.939148 -1.287545  
O 2.621879 0.600724 0.537146  
C 3.756385 0.035492 1.074270  
O 4.811017 0.499551 0.720068  
C 3.602482 -1.099836 2.057789  
H 2.941541 -0.829125 2.888385  
H 3.191299 -1.990443 1.568387  
H 4.593252 -1.331493 2.449714

PBN-CH2OCONHMe-3.com.log

52

C 4.330834 -0.263791 2.237438  
C 3.038520 -0.251195 1.716006  
C 2.829656 0.064332 0.356033  
C 3.952122 0.366225 -0.446293  
C 5.236066 0.351143 0.084719  
C 5.431778 0.034497 1.432317  
H 4.477869 -0.509446 3.286161  
H 2.183339 -0.480091 2.335970  
H 3.802867 0.616961 -1.493390  
H 6.085286 0.586385 -0.551121  
H 6.435143 0.021639 1.849849  
C 1.537098 0.106557 -0.298991  
H 1.520904 0.346898 -1.352478  
N 0.363633 -0.101724 0.255645  
O 0.175434 -0.393682 1.494099  
C -0.897444 -0.041135 -0.595203



C -0.956982 1.246830 -1.435255  
H -1.940494 1.299412 -1.908134  
H -0.185951 1.273765 -2.206562  
C -0.934293 -1.251357 -1.548375  
H -0.120729 -1.208522 -2.275340  
H -1.895592 -1.262647 -2.068309  
C -2.079392 -0.091402 0.394257  
H -2.022024 0.752061 1.085488  
H -2.040976 -1.028553 0.952197  
C -4.508784 0.065444 0.170810  
O -5.480727 0.230126 -0.535201  
O -3.267903 -0.017099 -0.404172  
N -4.550258 -0.017906 1.536802  
H -3.746036 -0.363311 2.038328  
C -5.836552 -0.060573 2.216172  
H -6.293562 -1.058514 2.185242  
H -5.699243 0.237926 3.259064  
H -6.513539 0.640252 1.726019  
O -0.823251 2.397626 -0.597783  
C 0.251893 3.216433 -0.846080  
O 1.070751 3.033852 -1.729858  
N 0.234677 4.252909 0.027752  
H -0.472434 4.233788 0.748187  
C 1.290913 5.246353 0.075868  
H 0.865902 6.254972 0.112279  
H 1.944154 5.103463 0.945817  
H 1.887502 5.143120 -0.831197  
O -0.837847 -2.469418 -0.809520  
C 0.313058 -3.202533 -0.984861  
O 1.191056 -2.928363 -1.781931  
N 0.284196 -4.281278 -0.161877  
H -0.451252 -4.304362 0.529635  
C 1.417509 -5.178626 -0.032651  
H 2.013781 -4.960209 0.862635  
H 1.073987 -6.217108 0.013037  
H 2.049262 -5.049435 -0.912175

PBN-CH2OMe-3.com.log

40

C 4.623456 -1.346461 0.497528  
C 3.238215 -1.210290 0.425661  
C 2.669649 -0.002644 -0.034114  
C 3.537494 1.046557 -0.411017  
C 4.917354 0.901022 -0.333519  
C 5.468365 -0.300342 0.122165  
H 5.046398 -2.282419 0.853566  
H 2.580279 -2.016052 0.718887  
H 3.113549 1.983066 -0.766521  
H 5.564583 1.723005 -0.627889  
H 6.547065 -0.417647 0.183999  
C 1.247509 0.258356 -0.159151  
H 0.934160 1.236238 -0.495013  
N 0.270024 -0.568191 0.148074  
O 0.427183 -1.746612 0.636724  
C -1.190382 -0.187436 -0.031099  
C -1.714312 0.057825 1.397662  
H -1.465913 -0.820846 2.009794  
H -1.202807 0.935729 1.819491  
C -1.429220 1.031248 -0.930669  
H -0.951494 0.877990 -1.912433  
H -2.510361 1.094373 -1.089046  
C -1.835814 -1.438296 -0.693322  
H -1.990817 -2.211872 0.067799  
H -1.134684 -1.846383 -1.438335  
C -3.718838 -2.203866 -1.859331  
H -3.971193 -2.943114 -1.083006  
H -4.641526 -1.838498 -2.317429  
H -3.108966 -2.704862 -2.628820  
O -3.055452 -1.084123 -1.313562  
O -3.109050 0.268991 1.345193

C -3.660785 0.519752 2.620279  
H -4.735509 0.664094 2.482190  
H -3.497699 -0.325652 3.307847  
H -3.232258 1.425516 3.078843  
O -0.952357 2.222165 -0.321709  
C -1.368773 3.384245 -1.013164  
H -0.968715 4.242216 -0.467062  
H -0.984304 3.404191 -2.045075  
H -2.466071 3.456879 -1.048935

PBN-CH2POOMe2-3c.com.log

61

C 5.017395 -2.393986 -0.532489  
C 3.760607 -1.826149 -0.333403  
C 3.229256 -0.933433 -1.288875  
C 4.001423 -0.637965 -2.434894  
C 5.254298 -1.209392 -2.622957  
C 5.769220 -2.092805 -1.669861  
H 5.412895 -3.080746 0.211329  
H 3.176787 -2.056806 0.545964  
H 3.604513 0.045061 -3.182873  
H 5.828903 -0.968531 -3.513167  
H 6.747841 -2.542293 -1.814716  
C 1.937088 -0.281775 -1.189171  
N 1.049382 -0.411234 -0.229036  
O 1.197981 -1.151495 0.800927  
C -0.272321 0.384981 -0.288082  
C 0.058787 1.901721 -0.254267  
H -0.885035 2.453643 -0.255073  
H 0.558488 2.190109 -1.186236  
C -0.953513 0.017094 -1.636544  
H -0.348030 0.372042 -2.475577  
H -0.997666 -1.075891 -1.706806  
C -1.116045 -0.015975 0.937793  
H -2.062164 0.527516 0.872104  
H -0.619451 0.301448 1.853915  
H 1.662053 0.392441 -1.989482  
P -1.569339 -1.780375 1.153255  
O -3.050738 -1.538356 1.778997  
O -0.838422 -2.381817 2.463590  
C 0.220224 -3.350971 2.381253  
H 1.163949 -2.865174 2.635054  
H -0.008238 -4.135284 3.108764  
H 0.281356 -3.777719 1.378290  
C -3.772040 -2.658202 2.310265  
H -3.849099 -3.460399 1.568494  
H -3.281513 -3.037356 3.211868  
H -4.770949 -2.294047 2.559025  
O -1.513592 -2.653657 -0.056974  
P -2.645035 0.566139 -2.077486  
O -2.918396 0.396742 -3.527701  
O -3.696670 -0.174191 -1.096779  
O -2.714014 2.074318 -1.492131  
C -3.902670 2.855070 -1.734065  
H -3.686226 3.862241 -1.375022  
H -4.129434 2.879078 -2.803413  
H -4.746531 2.433466 -1.180507  
C -4.298738 -1.426977 -1.498212  
H -3.598941 -2.244542 -1.308878  
H -5.188042 -1.544977 -0.876588  
H -4.577720 -1.390037 -2.553941  
P 1.072172 2.695460 1.047888  
O 1.324239 4.129545 0.748877  
O 0.226174 2.365063 2.384274  
O 2.414817 1.822923 1.288454  
C 0.721753 2.829187 3.655128  
H 0.919125 3.904425 3.618504  
H -0.062177 2.620276 4.384490  
H 1.633653 2.287499 3.922559  
C 3.695280 2.277135 0.809679

H 3.917824 1.795543 -0.146850  
H 3.703556 3.363758 0.697594  
H 4.436573 1.967592 1.549507

PBN-CH2SMe-3.com.log

40

C -5.258421 -1.389800 -0.058811  
C -3.876805 -1.207248 -0.075726  
C -3.335410 0.093834 0.002121  
C -4.225761 1.186816 0.096002  
C -5.601625 0.993688 0.112618  
C -6.125692 -0.299975 0.034800  
H -5.660197 -2.397842 -0.119230  
H -3.203782 -2.049513 -0.147423  
H -3.824711 2.196330 0.156972  
H -6.266291 1.850217 0.186129  
H -7.201188 -0.454844 0.047497  
C -1.918569 0.414184 -0.005988  
H -1.655694 1.457540 0.068038  
N -0.918027 -0.437205 -0.086523  
O -1.065783 -1.704653 -0.155336  
C 0.588245 0.016208 -0.006842  
C 1.221557 -0.656561 -1.249348  
H 0.648415 -1.566575 -1.433369  
H 1.105514 0.018616 -2.104936  
C 0.664825 1.554175 -0.071965  
H 0.070804 1.894316 -0.926977  
H 0.239344 1.987221 0.840610  
C 0.987899 -0.569104 1.373528  
H 0.870493 -1.651931 1.316925  
H 0.262938 -0.194705 2.104089  
S 2.678484 -0.199410 2.002750  
C 3.197914 -1.888026 2.476041  
H 3.251702 -2.530908 1.593225  
H 4.196734 -1.793195 2.911150  
H 2.527935 -2.319651 3.225256  
S 2.992362 -1.164150 -1.156628  
S 2.349907 2.269106 -0.307412  
C 3.021762 -2.037981 -2.763830  
H 4.030488 -2.441763 -2.885935  
H 2.303721 -2.864370 -2.783691  
H 2.815791 -1.354323 -3.593969  
C 1.813620 4.008404 -0.476543  
H 1.317994 4.368076 0.431163  
H 2.719528 4.599227 -0.635983  
H 1.149644 4.145317 -1.336905

PBN-CONH2-3.com.log

31

C 4.252056 -1.198973 0.262315  
C 2.867809 -1.042645 0.262984  
C 2.300625 0.210063 -0.056854  
C 3.164339 1.283574 -0.369291  
C 4.543442 1.115844 -0.367647  
C 5.093677 -0.129820 -0.051418  
H 4.677000 -2.167712 0.511061  
H 2.212037 -1.865434 0.509560  
H 2.739384 2.254430 -0.612964  
H 5.190156 1.954259 -0.610880  
H 6.172008 -0.264127 -0.048603  
C 0.880826 0.496671 -0.100836  
H 0.583593 1.507061 -0.339886  
N -0.098235 -0.339778 0.154028  
O 0.059824 -1.584203 0.475480  
C -1.546899 0.052037 -0.029149  
C -2.035181 -0.499665 -1.412759  
N -1.449643 -1.646012 -1.794916  
H -1.832995 -2.108233 -2.608095  
H -0.878549 -2.158758 -1.125125

O -2.885367 0.081518 -2.087888  
C -2.364244 -0.727897 1.080709  
O -3.158565 -1.597622 0.773670  
N -2.105098 -0.310882 2.338166  
H -2.582186 -0.769425 3.100916  
H -1.513965 0.494059 2.507937  
C -1.756447 1.577156 0.234059  
O -1.176907 2.107463 1.183056  
N -2.629992 2.207902 -0.562527  
H -2.840275 3.175323 -0.357734  
H -3.057335 1.694639 -1.336669

PBN-COOMe-3.com.log

37

C -4.689173 -0.348383 1.161679  
C -3.305093 -0.261775 1.026368  
C -2.723671 -0.221893 -0.259581  
C -3.574149 -0.271846 -1.386700  
C -4.953086 -0.357711 -1.239546  
C -5.517830 -0.396574 0.038891  
H -5.124104 -0.378587 2.157280  
H -2.659722 -0.224508 1.892684  
H -3.137887 -0.244481 -2.382403  
H -5.588817 -0.395602 -2.120019  
H -6.596043 -0.464258 0.156933  
C -1.302979 -0.128859 -0.528445  
H -0.967381 -0.123274 -1.555252  
N -0.343417 -0.092585 0.371752  
O -0.497939 -0.096892 1.643571  
C 1.095418 0.098120 -0.046562  
C 3.463771 -1.530973 -2.375331  
H 3.044357 -2.529987 -2.514581  
H 3.282765 -0.928634 -3.268402  
H 4.529009 -1.583752 -2.153568  
C 1.546761 -0.717775 -1.282653  
O 0.839172 -1.105867 -2.182516  
O 2.868911 -0.895612 -1.226441  
C 1.946622 -0.302844 1.188575  
O 2.639846 0.465063 1.807232  
C 1.346549 1.591728 -0.372963  
O 2.005770 1.953303 -1.321536  
O 1.847660 -1.619454 1.400426  
O 0.742609 2.388481 0.502649  
C 0.960095 3.799625 0.310816  
H 0.603119 4.108879 -0.674661  
H 0.390083 4.286264 1.101257  
H 2.024424 4.028697 0.401762  
C 2.533179 -2.103742 2.568922  
H 2.116425 -1.635619 3.464003  
H 2.359678 -3.179599 2.581395  
H 3.601283 -1.882194 2.503415

PBN-NHCOMe-3.com.log

40

C 4.422759 1.641564 -0.067954  
C 3.051535 1.398273 -0.020560  
C 2.570149 0.071957 -0.001391  
C 3.505907 -0.985105 -0.030328  
C 4.871645 -0.731064 -0.078420  
C 5.337364 0.586858 -0.097322  
H 4.779433 2.668195 -0.082346  
H 2.341388 2.213526 0.001108  
H 3.147686 -2.012140 -0.017526  
H 5.574242 -1.559854 -0.101495  
H 6.404621 0.788149 -0.134642  
C 1.166388 -0.292449 0.046167  
H 0.909662 -1.344393 0.048473  
N 0.141267 0.528052 0.057252

O 0.176894 1.795048 0.030691  
C -1.354406 -0.128597 0.028224  
N -1.424937 -1.189902 0.990568  
H -1.256790 -2.112914 0.589328  
C -1.468526 -0.998900 2.348378  
O -1.579713 0.108943 2.868033  
C -1.357564 -2.266977 3.172383  
H -2.040660 -2.194925 4.021764  
H -1.575086 -3.173077 2.599820  
H -0.338762 -2.340772 3.570016  
N -2.240304 0.942319 0.348924  
H -2.158254 1.177471 1.338040  
N -1.589727 -0.614043 -1.306107  
H -1.916798 0.137711 -1.921288  
C -2.547685 1.969781 -0.524312  
O -2.516362 1.853479 -1.747623  
C -1.302636 -1.853773 -1.796038  
O -0.870623 -2.784979 -1.107415  
C -2.983272 3.247830 0.155399  
H -2.086952 3.775619 0.500614  
H -3.514793 3.874018 -0.562301  
H -3.619928 3.052090 1.024577  
C -1.542703 -2.018967 -3.283221  
H -2.173720 -1.233488 -3.707525  
H -0.575228 -2.006814 -3.798062  
H -1.999449 -2.995919 -3.458528

PBN-OCOMe-3.com.log

37

C 4.623746 0.314585 -1.412938  
C 3.241393 0.334233 -1.241376  
C 2.675669 -0.136765 -0.036696  
C 3.537025 -0.617598 0.974514  
C 4.914238 -0.629214 0.792963  
C 5.464074 -0.162895 -0.405077  
H 5.048284 0.678923 -2.344589  
H 2.586872 0.706815 -2.016997  
H 3.112065 -0.979853 1.907725  
H 5.560106 -1.000670 1.583726  
H 6.541036 -0.171273 -0.549689  
C 1.256767 -0.176645 0.245977  
H 0.936023 -0.530039 1.214533  
N 0.297677 0.250371 -0.548730  
O 0.426555 0.817574 -1.682044  
C -1.163504 0.146822 -0.111186  
C -1.102816 2.366873 0.878068  
O -0.209222 2.108468 1.635409  
O -1.678102 1.443416 0.011129  
C -1.778323 3.698643 0.691871  
H -1.614203 4.053423 -0.330950  
H -2.858703 3.603376 0.840785  
H -1.364772 4.412128 1.404906  
O -1.787896 -0.482265 -1.174303  
C -3.166559 -0.700847 -1.284314  
O -3.498659 -1.556170 -2.058155  
C -4.121500 0.141883 -0.477895  
H -3.878668 0.125758 0.587359  
H -4.073946 1.181694 -0.812198  
H -5.123981 -0.255088 -0.641045  
O -1.349232 -0.506734 1.104810  
C -1.293076 -1.901459 1.332750  
O -1.521068 -2.240186 2.458636  
C -0.971513 -2.842464 0.197834  
H -0.732210 -3.808005 0.645788  
H -1.835163 -2.960295 -0.463602  
H -0.139214 -2.493227 -0.415475

PBN-OCONHMe-3.com.log

43

C 5.107449 -0.909592 -0.329146  
C 3.721883 -0.803868 -0.426499  
C 3.001564 -0.075997 0.544998  
C 3.713669 0.533606 1.601297  
C 5.095726 0.419248 1.689669  
C 5.799298 -0.304750 0.722487  
H 5.652235 -1.470278 -1.084096  
H 3.181358 -1.266930 -1.240252  
H 3.167691 1.096694 2.354501  
H 5.625790 0.893638 2.511005  
H 6.880237 -0.395058 0.789014  
C 1.564641 0.102039 0.540957  
H 1.113636 0.705085 1.319869  
N 0.710037 -0.410880 -0.312353  
O 0.987497 -1.172139 -1.304522  
C -0.781665 -0.020521 -0.094887  
C -0.652488 2.036547 -1.375618  
O -0.123524 1.537413 -2.338187  
O -0.939865 1.360369 -0.181638  
N -1.055847 3.319842 -1.217144  
H -1.468802 3.573454 -0.331138  
C -0.857465 4.324608 -2.245528  
H -1.812793 4.765686 -2.551235  
H -0.192068 5.122729 -1.896371  
H -0.401434 3.833840 -3.106233  
O -1.566667 -0.626640 -1.047656  
C -2.053935 -1.937633 -0.821237  
O -3.158593 -2.103677 -0.329257  
N -1.207254 -2.856662 -1.285151  
H -0.289428 -2.488208 -1.554418  
C -1.472733 -4.281606 -1.201911  
H -2.501750 -4.424885 -0.869762  
H -1.342140 -4.748296 -2.183672  
H -0.795179 -4.764335 -0.488027  
O -1.066804 -0.406607 1.199685  
C -2.020125 0.360888 1.955862  
O -1.628006 1.178324 2.754582  
N -3.274223 -0.024314 1.681099  
H -3.409995 -0.764764 0.989078  
C -4.419057 0.543414 2.372452  
H -5.159012 0.902235 1.649164  
H -4.894904 -0.200276 3.022547  
H -4.075294 1.379110 2.983430

PBN-OMe-3.com.log

31

C -3.932628 -1.149724 0.147727  
C -2.546700 -1.005125 0.133639  
C -1.971868 0.273142 -0.036044  
C -2.832084 1.383057 -0.188974  
C -4.212894 1.227451 -0.174106  
C -4.770719 -0.043378 -0.004844  
H -4.361832 -2.139712 0.279136  
H -1.892622 -1.857985 0.250367  
H -2.401655 2.373223 -0.320605  
H -4.855775 2.095417 -0.294157  
H -5.850256 -0.168185 0.007274  
C -0.547664 0.543100 -0.063180  
H -0.211102 1.560633 -0.197767  
N 0.417156 -0.340505 0.063336  
O 0.274339 -1.604411 0.225997  
C 1.895817 0.099442 -0.079456  
C 2.321410 -0.612662 2.164121  
H 1.409254 -1.192301 2.327252  
H 3.157404 -1.075736 2.691398  
H 2.190299 0.416580 2.514478  
O 2.678658 -0.640872 0.777067  
O 1.919282 1.457775 0.186822  
C 3.169115 2.106424 -0.086339  
H 3.335608 2.191761 -1.163189

H 3.086697 3.098580 0.361120  
H 3.998240 1.559272 0.372841  
O 2.310484 -0.112792 -1.372882  
C 2.491786 -1.470262 -1.812033  
H 1.543349 -2.011388 -1.797150  
H 2.870539 -1.386140 -2.832581  
H 3.218231 -1.986870 -1.180873

PBN-POOMe2-3.com.log

52

C -5.226961 1.569857 -0.373077  
C -3.856494 1.329243 -0.305452  
C -3.382097 0.031462 -0.017330  
C -4.323502 -0.999637 0.197345  
C -5.688181 -0.748322 0.127552  
C -6.146409 0.541074 -0.158438  
H -5.579607 2.573210 -0.596955  
H -3.141690 2.121926 -0.474003  
H -3.969280 -2.003904 0.416301  
H -6.395438 -1.556086 0.294622  
H -7.213226 0.740760 -0.213942  
C -1.987357 -0.348401 0.075301  
N -0.948835 0.435811 -0.101169  
O -1.006591 1.693555 -0.392674  
C 0.461918 -0.069891 -0.005646  
H -1.749554 -1.378040 0.302296  
P 1.494838 1.345595 -0.749449  
O 2.914494 0.751964 -0.243255  
O 1.509604 2.698427 0.127294  
C 0.693591 3.840047 -0.200896  
H 1.289880 4.718665 0.057510  
H 0.451469 3.848632 -1.265313  
H -0.222379 3.804999 0.388766  
C 4.127691 1.372433 -0.694640  
H 4.201560 2.394394 -0.309593  
H 4.946632 0.769595 -0.298493  
H 4.166437 1.384683 -1.787792  
O 1.357902 1.515591 -2.219078  
P 0.949943 -0.467001 1.780788  
O 2.218021 -1.229450 1.903781  
O -0.350701 -1.172869 2.403156  
O 0.886465 0.966377 2.496359  
C 2.047905 1.566214 3.107776  
H 2.856561 0.838035 3.199170  
H 2.361321 2.405919 2.485787  
H 1.742311 1.915870 4.096484  
C -0.295630 -2.551550 2.847858  
H 0.579176 -2.712151 3.481425  
H -1.210090 -2.705605 3.423117  
H -0.262517 -3.212018 1.980822  
P 0.623987 -1.656605 -1.044852  
O 0.077268 -2.798369 -0.265238  
O -0.176793 -1.330035 -2.380143  
O 2.136946 -1.785002 -1.544104  
C 0.392051 -1.066096 -3.686311  
H 1.088881 -1.861442 -3.959338  
H -0.457304 -1.061073 -4.370852  
H 0.887118 -0.095428 -3.674439  
C 3.121322 -2.559542 -0.813179  
H 3.951873 -2.701114 -1.506529  
H 3.430761 -2.008811 0.074487  
H 2.697416 -3.524383 -0.526619

PBN-SMe-3.com.log

31

C -4.398099 -1.113063 -0.335502  
C -3.010728 -1.002672 -0.267883  
C -2.413145 0.254830 -0.033757  
C -3.253083 1.379329 0.130147

|   |           |           |           |
|---|-----------|-----------|-----------|
| C | -4.635429 | 1.257074  | 0.063264  |
| C | -5.215598 | 0.006758  | -0.170929 |
| H | -4.844469 | -2.087180 | -0.517588 |
| H | -2.376021 | -1.868485 | -0.392841 |
| H | -2.805665 | 2.354078  | 0.310028  |
| H | -5.261864 | 2.135478  | 0.192770  |
| H | -6.296524 | -0.091869 | -0.223963 |
| C | -0.986570 | 0.497142  | 0.046915  |
| H | -0.650681 | 1.505850  | 0.247419  |
| N | -0.029222 | -0.401175 | -0.066883 |
| O | -0.211180 | -1.652997 | -0.221880 |
| C | 1.454166  | 0.064327  | 0.075973  |
| S | 2.601229  | -1.253800 | -0.449114 |
| C | 2.093207  | -1.586137 | -2.173234 |
| H | 1.111804  | -2.060310 | -2.182542 |
| H | 2.086078  | -0.662972 | -2.758154 |
| H | 2.848509  | -2.265413 | -2.578833 |
| S | 1.615469  | 1.630621  | -0.916665 |
| C | 3.379474  | 2.051284  | -0.684099 |
| H | 3.561016  | 2.900917  | -1.348701 |
| H | 3.590142  | 2.343898  | 0.345995  |
| H | 4.013411  | 1.211656  | -0.975361 |
| S | 1.788605  | 0.445698  | 1.850359  |
| C | 1.441049  | -1.165593 | 2.659244  |
| H | 1.310884  | -0.938961 | 3.721063  |
| H | 0.522370  | -1.600475 | 2.260704  |
| H | 2.268719  | -1.863991 | 2.529088  |

PBN-alpha-carbamate-O2.log

35

|   |           |           |           |
|---|-----------|-----------|-----------|
| C | 4.319737  | 0.699207  | -0.890415 |
| C | 2.931449  | 0.772818  | -0.789331 |
| C | 2.212567  | -0.221950 | -0.113180 |
| C | 2.908739  | -1.290691 | 0.456753  |
| C | 4.300337  | -1.364679 | 0.356180  |
| C | 5.011600  | -0.371205 | -0.316668 |
| H | 4.864290  | 1.482491  | -1.413725 |
| H | 2.399790  | 1.613513  | -1.224390 |
| H | 2.342190  | -2.058564 | 0.971581  |
| H | 4.828123  | -2.203650 | 0.805140  |
| H | 6.095430  | -0.427825 | -0.394731 |
| C | 0.691906  | -0.208373 | -0.073506 |
| H | 0.284284  | -0.464631 | -1.050655 |
| N | 0.172137  | 1.126991  | 0.277221  |
| O | 0.855797  | 1.918549  | 1.022317  |
| C | -1.309331 | 1.408091  | 0.136881  |
| C | -1.940441 | 1.293081  | 1.531344  |
| H | -2.998622 | 1.556439  | 1.482310  |
| H | -1.840777 | 0.266612  | 1.891729  |
| H | -1.410644 | 1.965577  | 2.211578  |
| C | -1.468699 | 2.815724  | -0.447188 |
| H | -0.988874 | 3.565067  | 0.188860  |
| H | -1.018793 | 2.850290  | -1.445114 |
| H | -2.538507 | 3.023600  | -0.540409 |
| C | -3.018016 | -0.220097 | -0.535584 |
| O | -4.054498 | 0.456181  | -0.519765 |
| O | -1.768541 | 0.461110  | -0.795492 |
| N | -2.804214 | -1.510659 | -0.388902 |
| H | -1.314846 | -2.012862 | -0.084732 |
| C | -4.012978 | -2.289966 | -0.203535 |
| H | -4.694053 | -2.232471 | -1.070026 |
| H | -3.742535 | -3.344008 | -0.057034 |
| H | -4.603828 | -1.965002 | 0.670112  |
| O | 0.167255  | -1.161776 | 0.847835  |
| O | -0.324926 | -2.306646 | 0.091451  |

PBN-alpha-carboxyl-O2.log

33

|   |           |           |          |
|---|-----------|-----------|----------|
| C | -3.405909 | -1.261526 | 1.142248 |
|---|-----------|-----------|----------|



|   |           |           |           |
|---|-----------|-----------|-----------|
| C | -2.141906 | -0.929168 | 0.658799  |
| C | -2.018550 | -0.024954 | -0.405058 |
| C | -3.160483 | 0.535799  | -0.974689 |
| C | -4.427855 | 0.202235  | -0.488401 |
| C | -4.551962 | -0.698074 | 0.570248  |
| H | -3.500777 | -1.963030 | 1.968452  |
| H | -1.231720 | -1.349606 | 1.080054  |
| H | -3.056975 | 1.239981  | -1.797065 |
| H | -5.315050 | 0.646096  | -0.935623 |
| H | -5.537567 | -0.959970 | 0.950487  |
| C | -0.624859 | 0.289397  | -0.913610 |
| H | -0.660821 | 0.917317  | -1.821749 |
| N | 0.097498  | 1.094304  | 0.116953  |
| O | -0.479188 | 2.211611  | 0.388756  |
| C | 1.575260  | 0.986898  | 0.351872  |
| C | 2.282812  | 1.954629  | -0.612123 |
| H | 3.354153  | 1.979202  | -0.395673 |
| H | 2.152871  | 1.622423  | -1.645193 |
| H | 1.864569  | 2.961692  | -0.496036 |
| C | 1.836227  | 1.371399  | 1.811638  |
| H | 1.443103  | 2.369223  | 2.027612  |
| H | 1.363883  | 0.633758  | 2.464488  |
| H | 2.915972  | 1.356546  | 1.995775  |
| C | 3.920239  | -1.829234 | -0.111585 |
| H | 3.608241  | -2.329988 | 0.812363  |
| H | 3.620481  | -2.461974 | -0.961119 |
| H | 5.011333  | -1.707024 | -0.127442 |
| C | 1.942073  | -0.522887 | 0.136926  |
| O | 1.515133  | -1.348662 | 0.978346  |
| O | 3.358896  | -0.537843 | -0.197228 |
| O | -0.039029 | -0.953504 | -1.174690 |
| O | 1.386100  | -0.754335 | -1.362133 |

PBN-alpha-CH2CONH2-O2.log

34

|   |           |           |           |
|---|-----------|-----------|-----------|
| C | -3.789790 | -1.492506 | -0.701010 |
| C | -2.545109 | -1.425026 | -0.070541 |
| C | -2.003192 | -0.190618 | 0.311041  |
| C | -2.740485 | 0.975032  | 0.056587  |
| C | -3.985345 | 0.904856  | -0.569705 |
| C | -4.517182 | -0.328748 | -0.952782 |
| H | -4.190815 | -2.460539 | -0.995362 |
| H | -1.975072 | -2.324168 | 0.131987  |
| H | -2.322389 | 1.931205  | 0.352656  |
| H | -4.542428 | 1.820389  | -0.759720 |
| H | -5.488147 | -0.381245 | -1.441536 |
| C | -0.652833 | -0.142506 | 1.038845  |
| N | 0.140322  | 1.074023  | 0.548079  |
| O | -0.201259 | 2.168594  | 1.137392  |
| C | 1.476286  | 1.092499  | -0.148972 |
| C | 1.524073  | 2.386659  | -0.982837 |
| H | 2.491068  | 2.434991  | -1.496158 |
| H | 0.730907  | 2.390456  | -1.740153 |
| H | 1.400826  | 3.266863  | -0.348632 |
| C | 2.552323  | 1.153229  | 0.954709  |
| H | 2.408935  | 2.071186  | 1.534721  |
| H | 2.430646  | 0.288565  | 1.611988  |
| H | 3.554131  | 1.159801  | 0.511021  |
| C | 1.630017  | -0.125665 | -1.125713 |
| H | 0.783391  | -0.799564 | -1.005506 |
| H | 1.635294  | 0.248582  | -2.153250 |
| C | 2.924955  | -0.933326 | -0.965219 |
| O | 3.905849  | -0.720216 | -1.690569 |
| N | 2.876410  | -1.887291 | -0.007464 |
| H | 3.769966  | -2.328200 | 0.179613  |
| H | 2.147611  | -1.832340 | 0.783491  |
| H | -0.793761 | 0.095971  | 2.102488  |
| O | -0.044073 | -1.359196 | 0.898710  |
| O | 1.039535  | -1.480728 | 1.889669  |

PBN-alpha-CH2OH-O2.com.log

31

|   |           |           |           |
|---|-----------|-----------|-----------|
| C | 3.573530  | -1.405916 | 0.377869  |
| C | 2.215303  | -1.110196 | 0.485659  |
| C | 1.728866  | 0.160749  | 0.151166  |
| C | 2.633723  | 1.128060  | -0.295491 |
| C | 3.994084  | 0.831534  | -0.412845 |
| C | 4.471871  | -0.435045 | -0.074248 |
| H | 3.932133  | -2.399626 | 0.640673  |
| H | 1.517157  | -1.873160 | 0.817753  |
| H | 2.245153  | 2.109360  | -0.543451 |
| H | 4.683034  | 1.596300  | -0.767336 |
| H | 5.532038  | -0.665912 | -0.161259 |
| C | 0.264734  | 0.532933  | 0.367219  |
| N | -0.600538 | -0.593233 | -0.154769 |
| O | -0.246505 | -1.120961 | -1.281949 |
| C | -2.067462 | -0.649950 | 0.157611  |
| C | -2.549437 | -2.086915 | -0.078208 |
| H | -3.642130 | -2.110763 | -0.012120 |
| H | -2.239208 | -2.431957 | -1.067075 |
| H | -2.135002 | -2.771326 | 0.673908  |
| C | -2.324938 | -0.223624 | 1.609735  |
| H | -1.764432 | -0.854944 | 2.312196  |
| H | -2.033999 | 0.828222  | 1.728298  |
| H | -3.392291 | -0.345847 | 1.830422  |
| C | -2.769385 | 0.335452  | -0.815083 |
| O | -4.192132 | 0.394585  | -0.589170 |
| H | -4.309951 | 1.083504  | 0.082060  |
| H | -2.623310 | -0.019784 | -1.840443 |
| H | -2.313234 | 1.324522  | -0.665493 |
| H | 0.064884  | 0.601882  | 1.444115  |
| O | -0.015289 | 1.752544  | -0.208357 |
| O | -1.088876 | 2.426290  | 0.550831  |

PBN-alpha-CONH2-O2.log

31

|   |           |           |           |
|---|-----------|-----------|-----------|
| C | -4.056753 | -0.502590 | 0.370308  |
| C | -2.791542 | -1.088505 | 0.461995  |
| C | -1.656369 | -0.407014 | 0.018116  |
| C | -1.797915 | 0.879924  | -0.520181 |
| C | -3.060753 | 1.463420  | -0.615382 |
| C | -4.194705 | 0.775744  | -0.171444 |
| H | -4.932047 | -1.044005 | 0.724205  |
| H | -2.681306 | -2.084342 | 0.885034  |
| H | -0.912239 | 1.417975  | -0.849027 |
| H | -3.161119 | 2.462400  | -1.034877 |
| H | -5.178118 | 1.236457  | -0.243606 |
| C | -0.284121 | -1.061895 | 0.076327  |
| N | 0.602033  | -0.232880 | 0.989334  |
| O | 0.322801  | -0.370398 | 2.236063  |
| C | 1.942586  | 0.359016  | 0.647343  |
| C | 2.131545  | 1.589091  | 1.549593  |
| H | 3.135373  | 2.001481  | 1.395174  |
| H | 1.403011  | 2.359887  | 1.291873  |
| H | 2.013062  | 1.301185  | 2.595951  |
| C | 3.014321  | -0.703009 | 0.961374  |
| H | 2.969588  | -0.941568 | 2.030479  |
| H | 2.808810  | -1.604704 | 0.380243  |
| H | 4.014077  | -0.327098 | 0.717464  |
| C | 1.973346  | 0.859286  | -0.836557 |
| N | 2.599473  | 0.036163  | -1.717799 |
| H | 2.469809  | 0.395787  | -2.661540 |
| H | 2.246888  | -0.999716 | -1.605442 |
| O | 1.527852  | 1.980760  | -1.114105 |
| H | -0.334164 | -2.039938 | 0.572855  |
| O | 0.163549  | -1.187695 | -1.215522 |
| O | 1.287047  | -2.139866 | -1.249997 |

PBN-alpha-COOH-O2.com.log

|   |           |           |           |
|---|-----------|-----------|-----------|
| C | -3.262017 | -1.818860 | 0.383536  |
| C | -2.004215 | -1.223122 | 0.467734  |
| C | -1.829385 | 0.125036  | 0.126770  |
| C | -2.936782 | 0.861007  | -0.303866 |
| C | -4.196014 | 0.262468  | -0.396473 |
| C | -4.365698 | -1.078625 | -0.050354 |
| H | -3.380547 | -2.867418 | 0.650562  |
| H | -1.143383 | -1.804883 | 0.783999  |
| H | -2.786120 | 1.903950  | -0.559308 |
| H | -5.047390 | 0.848994  | -0.737468 |
| H | -5.346879 | -1.545068 | -0.118274 |
| C | -0.487151 | 0.822076  | 0.320930  |
| H | -0.303489 | 0.963893  | 1.394301  |
| N | 0.604169  | -0.099623 | -0.168787 |
| O | 0.411228  | -0.749484 | -1.269770 |
| C | 2.042560  | 0.165272  | 0.127669  |
| C | 2.584472  | 1.190634  | -0.879552 |
| H | 3.661415  | 1.340288  | -0.735783 |
| H | 2.408834  | 0.839299  | -1.900004 |
| H | 2.038130  | 2.127798  | -0.687111 |
| C | 2.234965  | 0.680938  | 1.563724  |
| H | 1.728042  | 1.654327  | 1.618050  |
| H | 1.825419  | -0.025284 | 2.293793  |
| H | 3.306327  | 0.806950  | 1.766001  |
| C | 2.691392  | -1.226732 | 0.033772  |
| O | 2.398706  | -2.183056 | 0.722002  |
| O | 3.712803  | -1.303104 | -0.862060 |
| H | 4.020747  | -2.226386 | -0.792980 |
| O | -0.474676 | 2.052600  | -0.291704 |
| O | 0.446559  | 2.948089  | 0.431832  |

PBN-alpha-ester-O2.log

33

|   |           |           |           |
|---|-----------|-----------|-----------|
| C | -3.004012 | -2.083886 | 0.370806  |
| C | -1.862992 | -1.286751 | 0.454861  |
| C | -1.922758 | 0.075479  | 0.130136  |
| C | -3.141387 | 0.621861  | -0.280490 |
| C | -4.282687 | -0.179041 | -0.372384 |
| C | -4.220430 | -1.534190 | -0.044957 |
| H | -2.942865 | -3.140312 | 0.626028  |
| H | -0.913072 | -1.716614 | 0.760868  |
| H | -3.171601 | 1.679069  | -0.519394 |
| H | -5.224283 | 0.259903  | -0.697927 |
| H | -5.110108 | -2.157923 | -0.111912 |
| C | -0.706968 | 0.974668  | 0.317653  |
| H | -0.485851 | 1.070992  | 1.388297  |
| N | 0.490877  | 0.283308  | -0.293697 |
| O | 0.344897  | -0.287185 | -1.440043 |
| C | 1.868265  | 0.749448  | 0.011661  |
| C | 2.244753  | 1.877694  | -0.942211 |
| H | 3.293156  | 2.165779  | -0.795268 |
| H | 2.098578  | 1.541431  | -1.972622 |
| H | 1.568799  | 2.714431  | -0.697688 |
| C | 2.041266  | 1.162097  | 1.468769  |
| H | 1.424821  | 2.058569  | 1.614215  |
| H | 1.741581  | 0.360996  | 2.148180  |
| H | 3.098046  | 1.399156  | 1.640865  |
| C | 2.594251  | -1.591618 | 0.169688  |
| O | 1.845591  | -1.912436 | 1.070909  |
| O | 2.773514  | -0.360643 | -0.329629 |
| C | 3.477877  | -2.576748 | -0.575428 |
| H | 3.049111  | -2.745194 | -1.569811 |
| H | 4.485520  | -2.173165 | -0.713752 |
| H | 3.516005  | -3.522555 | -0.031387 |
| O | -0.928097 | 2.224569  | -0.208516 |
| O | -0.082786 | 3.206722  | 0.499600  |

## PBN-alpha-ether-O2.log

31

|   |           |           |           |
|---|-----------|-----------|-----------|
| C | 3.405276  | -1.487216 | 0.238688  |
| C | 2.055768  | -1.166867 | 0.380914  |
| C | 1.602706  | 0.142651  | 0.172509  |
| C | 2.532643  | 1.123729  | -0.183703 |
| C | 3.884081  | 0.803507  | -0.336412 |
| C | 4.328329  | -0.501968 | -0.123237 |
| H | 3.737349  | -2.510808 | 0.403239  |
| H | 1.339581  | -1.940921 | 0.641555  |
| H | 2.169585  | 2.134270  | -0.333447 |
| H | 4.592509  | 1.580111  | -0.619495 |
| H | 5.381569  | -0.751779 | -0.237544 |
| C | 0.149078  | 0.535880  | 0.432148  |
| H | -0.044342 | 0.511903  | 1.511369  |
| N | -0.745474 | -0.517334 | -0.187502 |
| O | -0.415746 | -0.967399 | -1.350852 |
| C | -2.169256 | -0.761588 | 0.217629  |
| C | -2.394767 | -2.278776 | 0.203354  |
| H | -3.454338 | -2.490642 | 0.381698  |
| H | -2.105134 | -2.673449 | -0.772810 |
| H | -1.798661 | -2.766555 | 0.983014  |
| C | -2.462766 | -0.147794 | 1.590671  |
| H | -1.895075 | -0.656839 | 2.380978  |
| H | -2.193978 | 0.921406  | 1.582741  |
| H | -3.531253 | -0.280925 | 1.795622  |
| C | -2.824804 | 1.058189  | -1.254276 |
| H | -2.056001 | 1.024095  | -2.036739 |
| H | -3.774321 | 1.387092  | -1.695200 |
| H | -2.485634 | 1.753307  | -0.468667 |
| O | -3.073944 | -0.266120 | -0.759318 |
| O | -0.095702 | 1.811120  | -0.024044 |
| O | -1.077268 | 2.480225  | 0.855025  |

## PBN-alpha-methylcarbamate-O2.log

38

|   |           |           |           |
|---|-----------|-----------|-----------|
| C | -4.836961 | 0.583626  | 0.304302  |
| C | -3.458994 | 0.728493  | 0.455961  |
| C | -2.590192 | -0.324219 | 0.138509  |
| C | -3.130100 | -1.523725 | -0.332690 |
| C | -4.510929 | -1.668022 | -0.491764 |
| C | -5.370589 | -0.617012 | -0.172908 |
| H | -5.496760 | 1.412601  | 0.552746  |
| H | -3.048226 | 1.669127  | 0.810054  |
| H | -2.448226 | -2.333064 | -0.567892 |
| H | -4.913947 | -2.607850 | -0.864037 |
| H | -6.446169 | -0.729020 | -0.294268 |
| C | -1.090881 | -0.221231 | 0.399116  |
| H | -0.906007 | -0.273254 | 1.476198  |
| N | -0.594427 | 1.121201  | -0.068818 |
| O | -1.099720 | 1.582931  | -1.165756 |
| C | 0.814226  | 1.548607  | 0.223010  |
| C | 0.883196  | 3.077918  | 0.101760  |
| H | 1.931182  | 3.392653  | 0.153164  |
| H | 0.453725  | 3.404840  | -0.847881 |
| H | 0.332995  | 3.560957  | 0.918630  |
| C | 1.237457  | 1.116817  | 1.631756  |
| H | 0.564921  | 1.559185  | 2.378443  |
| H | 1.222735  | 0.025601  | 1.720583  |
| H | 2.249267  | 1.485700  | 1.824609  |
| C | 1.690035  | 0.889250  | -0.885222 |
| H | 1.556069  | 1.460725  | -1.810326 |
| H | 1.349816  | -0.127484 | -1.063910 |
| C | 3.805784  | -0.210195 | -0.294966 |
| O | 5.026078  | -0.107189 | -0.245819 |
| O | 3.086176  | 0.936360  | -0.577697 |
| N | 3.112644  | -1.356978 | -0.117129 |
| H | 2.070185  | -1.421948 | 0.137983  |
| C | 3.871085  | -2.554383 | 0.182351  |

|   |           |           |           |
|---|-----------|-----------|-----------|
| H | 4.471102  | -2.455058 | 1.098695  |
| H | 3.153838  | -3.370249 | 0.311214  |
| H | 4.562307  | -2.805682 | -0.632176 |
| O | -0.406692 | -1.280793 | -0.194395 |
| O | 0.623515  | -1.775420 | 0.739232  |

PBN-alpha-methylcarboxy-O2.log  
36

|   |           |           |           |
|---|-----------|-----------|-----------|
| C | 4.444587  | 1.119202  | -0.007778 |
| C | 3.168738  | 0.887808  | -0.522674 |
| C | 2.505506  | -0.321553 | -0.268351 |
| C | 3.148311  | -1.292950 | 0.508097  |
| C | 4.423431  | -1.057846 | 1.027866  |
| C | 5.078681  | 0.147746  | 0.771379  |
| H | 4.945726  | 2.063008  | -0.215118 |
| H | 2.668460  | 1.640618  | -1.124463 |
| H | 2.630014  | -2.226637 | 0.694636  |
| H | 4.906436  | -1.821396 | 1.635004  |
| H | 6.073531  | 0.329711  | 1.173546  |
| C | 1.129126  | -0.601091 | -0.875317 |
| H | 1.204284  | -0.728340 | -1.964338 |
| N | 0.268305  | 0.656960  | -0.770859 |
| O | 0.338963  | 1.452578  | -1.781414 |
| C | -0.878029 | 0.817752  | 0.189003  |
| C | -0.445923 | 0.335001  | 1.585795  |
| H | -1.257506 | 0.515660  | 2.293694  |
| H | -0.210964 | -0.729258 | 1.574243  |
| H | 0.444116  | 0.888215  | 1.910360  |
| C | -1.217891 | 2.315327  | 0.252335  |
| H | -0.365038 | 2.894132  | 0.627342  |
| H | -1.479136 | 2.700239  | -0.735324 |
| H | -2.062540 | 2.455110  | 0.935262  |
| C | -2.053009 | 0.003713  | -0.409889 |
| H | -1.654085 | -1.059149 | -0.604320 |
| H | -2.262984 | 0.380868  | -1.417172 |
| C | -5.628446 | -0.501852 | 0.192168  |
| H | -5.937633 | 0.425813  | 0.686918  |
| H | -6.345698 | -0.768328 | -0.588465 |
| H | -5.584906 | -1.292816 | 0.948707  |
| O | -4.376387 | -0.346680 | -0.467061 |
| C | -3.322358 | -0.023515 | 0.359296  |
| O | -3.508982 | 0.154325  | 1.553741  |
| O | 0.590367  | -1.718473 | -0.301529 |
| O | -0.507281 | -2.195826 | -1.159497 |

PBN-alpha-methylester-O2.log  
36

|   |           |           |           |
|---|-----------|-----------|-----------|
| C | -3.666103 | -2.242814 | 0.658497  |
| C | -2.547627 | -1.411406 | 0.693732  |
| C | -2.596665 | -0.119049 | 0.154922  |
| C | -3.790923 | 0.322755  | -0.420850 |
| C | -4.910858 | -0.511473 | -0.465345 |
| C | -4.855799 | -1.796438 | 0.076026  |
| H | -3.608833 | -3.243964 | 1.082030  |
| H | -1.619323 | -1.767055 | 1.132319  |
| H | -3.818763 | 1.329080  | -0.823285 |
| H | -5.831605 | -0.152287 | -0.921498 |
| H | -5.729392 | -2.444912 | 0.046427  |
| C | -1.415014 | 0.836045  | 0.286045  |
| N | -0.159021 | 0.104393  | -0.137438 |
| O | -0.245099 | -0.658363 | -1.183605 |
| C | 1.195156  | 0.710667  | 0.096747  |
| C | 1.473333  | 1.777092  | -0.976352 |
| H | 2.503570  | 2.142620  | -0.887390 |
| H | 1.331957  | 1.341595  | -1.972263 |
| H | 0.758414  | 2.598993  | -0.813919 |
| C | 1.269490  | 1.328535  | 1.497907  |
| H | 0.583270  | 2.183786  | 1.525414  |
| H | 0.997153  | 0.597089  | 2.271893  |

H 2.293676 1.664103 1.691023  
C 2.155135 -0.487436 -0.030500  
H 2.076930 -0.909062 -1.032375  
H 1.889662 -1.257240 0.705755  
C 4.565566 -0.840356 0.027794  
O 5.681005 -0.438294 0.284473  
O 3.506137 -0.034039 0.227103  
C 4.310060 -2.235091 -0.522115  
H 3.610493 -2.794727 0.107872  
H 3.870639 -2.187813 -1.524586  
H 5.264640 -2.760593 -0.568840  
H -1.274873 1.102726 1.341003  
O -1.631118 1.990760 -0.428881  
O -0.973297 3.120028 0.243840

PBN-alpha-methylether-O2.log  
34

C 3.505392 -2.062382 -0.145933  
C 2.213041 -1.527104 -0.135734  
C 2.026340 -0.140837 -0.119203  
C 3.148324 0.702558 -0.122282  
C 4.434405 0.164290 -0.140528  
C 4.619495 -1.222223 -0.148784  
H 3.639063 -3.143154 -0.144194  
H 1.349732 -2.181071 -0.106434  
H 2.964644 1.774912 -0.137775  
H 5.297811 0.827680 -0.146846  
H 5.623871 -1.642800 -0.156714  
C 0.683980 0.572621 -0.190336  
N -0.471121 -0.258545 0.214159  
O -0.333324 -1.084678 1.212895  
C -1.845328 0.338584 0.071796  
C -2.226827 1.076400 1.368331  
H -3.289510 1.342757 1.353660  
H -2.032485 0.423601 2.224981  
H -1.615345 1.975463 1.464350  
C -1.915973 1.290086 -1.130726  
H -1.210457 2.125944 -1.012869  
H -1.685129 0.759636 -2.064995  
H -2.939011 1.673033 -1.212872  
C -2.763492 -0.881308 -0.143648  
H -2.660593 -1.568486 0.706926  
H -2.449570 -1.418523 -1.055435  
C -4.998777 -1.534473 -0.438232  
H -4.968879 -2.226718 0.421623  
H -6.011047 -1.124555 -0.525048  
H -4.776537 -2.121265 -1.347540  
O -4.117238 -0.456127 -0.277846  
H 0.521580 0.871391 -1.229181  
O 0.693171 1.754046 0.562794  
O 0.789418 2.887348 -0.357727

PBN-alpha-methylphosphoryl-O2.log  
41

C -4.792271 1.375256 -0.737729  
C -3.522505 1.383521 -0.155439  
C -2.974861 0.208913 0.373114  
C -3.727428 -0.973147 0.318076  
C -4.998028 -0.978610 -0.257905  
C -5.536536 0.195680 -0.790725  
H -5.200828 2.295611 -1.150857  
H -2.935433 2.293444 -0.103041  
H -3.302722 -1.883489 0.730485  
H -5.569584 -1.904196 -0.292007  
H -6.526818 0.190044 -1.241916  
C -1.603688 0.229875 1.052040  
N -0.841975 -1.040895 0.682980  
O -0.978431 -2.023453 1.503634  
C 0.293655 -1.074962 -0.301642

C 0.530873 -2.539843 -0.695473  
H 1.406064 -2.586301 -1.350554  
H 0.703111 -3.155296 0.189779  
H -0.338903 -2.945540 -1.226322  
C -0.092399 -0.273106 -1.558168  
H -1.037685 -0.653430 -1.962344  
H -0.207802 0.787276 -1.337943  
H 0.682642 -0.401741 -2.320610  
C 1.532561 -0.498472 0.443473  
H 1.903382 -1.266313 1.135838  
H 1.183674 0.366026 1.068539  
H -1.708181 0.123795 2.139992  
O -0.955077 1.397528 0.751868  
O 0.082873 1.636624 1.775614  
P 2.941881 0.035446 -0.559216  
O 4.110606 0.349989 0.561233  
O 2.651674 1.523815 -1.096667  
C 2.331804 2.626079 -0.208105  
H 2.027479 3.446413 -0.864274  
H 1.515514 2.372463 0.491398  
H 3.234222 2.917512 0.340924  
C 4.903894 -0.733738 1.033416  
H 5.736002 -0.300943 1.597088  
H 4.328025 -1.387523 1.702799  
H 5.293587 -1.328433 0.200175  
O 3.402035 -0.873189 -1.649352

PBN-alpha-methylthio-O2.log

34

C 3.668188 -2.202018 -0.128849  
C 2.412904 -1.585377 -0.117170  
C 2.315114 -0.189920 -0.123283  
C 3.488089 0.579828 -0.151669  
C 4.737325 -0.039421 -0.171259  
C 4.833418 -1.434614 -0.155849  
H 3.733077 -3.288833 -0.108920  
H 1.509968 -2.182264 -0.068837  
H 3.374702 1.661100 -0.184231  
H 5.640896 0.567449 -0.196948  
H 5.808742 -1.918593 -0.164215  
C 1.018521 0.604211 -0.195460  
N -0.177027 -0.149051 0.245421  
O -0.070287 -0.954005 1.263506  
C -1.525808 0.517803 0.102956  
C -1.838611 1.282452 1.402703  
H -2.859320 1.681779 1.389432  
H -1.732795 0.608050 2.257428  
H -1.123951 2.101247 1.507215  
C -1.541668 1.473131 -1.098993  
H -0.768800 2.251460 -0.996232  
H -1.375541 0.927318 -2.037582  
H -2.527921 1.948035 -1.166993  
C -2.485757 -0.680401 -0.106107  
H -2.363685 -1.368773 0.733830  
H -2.203276 -1.202421 -1.028039  
S -4.266504 -0.217289 -0.236017  
C -4.964218 -1.901709 -0.343207  
H -4.720368 -2.488977 0.548622  
H -6.051681 -1.804974 -0.416100  
H -4.598015 -2.430422 -1.230195  
H 0.859414 0.887037 -1.239251  
O 1.111598 1.799979 0.528459  
O 1.233291 2.907523 -0.419907

PBN-alpha-phosphoryl-O2.log

38

C 3.437707 -1.844027 -0.902703  
C 2.294254 -1.225538 -0.397566  
C 2.384383 0.043198 0.191584

|   |           |           |           |
|---|-----------|-----------|-----------|
| C | 3.629133  | 0.675410  | 0.256565  |
| C | 4.774550  | 0.055598  | -0.249167 |
| C | 4.682021  | -1.209697 | -0.829381 |
| H | 3.357501  | -2.828522 | -1.359942 |
| H | 1.322100  | -1.703861 | -0.466159 |
| H | 3.697781  | 1.663764  | 0.704546  |
| H | 5.736393  | 0.561707  | -0.189473 |
| H | 5.571290  | -1.698215 | -1.223818 |
| C | 1.157890  | 0.721408  | 0.786827  |
| N | 0.355020  | 1.346453  | -0.331285 |
| O | 0.957319  | 2.267430  | -0.991956 |
| C | -1.147305 | 1.313862  | -0.347945 |
| C | -1.706690 | 2.084436  | 0.864753  |
| H | -2.801709 | 2.029906  | 0.876943  |
| H | -1.290627 | 1.664684  | 1.797504  |
| H | -1.412119 | 3.137718  | 0.764152  |
| C | -1.581198 | 1.972770  | -1.671201 |
| H | -1.154398 | 2.976618  | -1.710418 |
| H | -1.218088 | 1.417698  | -2.541582 |
| H | -2.669431 | 2.026571  | -1.715937 |
| H | 1.460800  | 1.544813  | 1.443095  |
| P | -1.758045 | -0.470447 | -0.325099 |
| O | -3.131387 | -0.251287 | -1.215799 |
| O | -2.492066 | -0.830012 | 1.064543  |
| C | -1.902436 | -1.642955 | 2.109475  |
| H | -1.288988 | -2.432049 | 1.665559  |
| H | -1.292353 | -0.989687 | 2.749235  |
| H | -2.751896 | -2.088832 | 2.639330  |
| C | -3.950815 | -1.395096 | -1.434555 |
| H | -3.366152 | -2.221384 | -1.855462 |
| H | -4.419085 | -1.724471 | -0.499491 |
| H | -4.728042 | -1.100547 | -2.146934 |
| O | -0.877371 | -1.526361 | -0.907642 |
| O | 0.383215  | -0.153605 | 1.511361  |
| O | -0.001762 | 0.506260  | 2.790020  |

PBN-alpha-thio-O2.log

31

|   |           |           |           |
|---|-----------|-----------|-----------|
| C | 3.247976  | -1.740882 | 0.344540  |
| C | 1.937480  | -1.253248 | 0.410435  |
| C | 1.656040  | 0.062015  | 0.027848  |
| C | 2.704065  | 0.886948  | -0.414019 |
| C | 4.005405  | 0.394563  | -0.484831 |
| C | 4.284378  | -0.923849 | -0.105758 |
| H | 3.456578  | -2.763428 | 0.655541  |
| H | 1.141267  | -1.878225 | 0.798105  |
| H | 2.442671  | 1.902948  | -0.706447 |
| H | 4.809397  | 1.040608  | -0.833718 |
| H | 5.302183  | -1.307197 | -0.157932 |
| C | 0.279044  | 0.707802  | -0.013459 |
| H | -0.039467 | 0.772742  | -1.058430 |
| N | -0.772497 | -0.037032 | 0.696141  |
| O | -0.530525 | -0.569605 | 1.855705  |
| C | -2.177640 | 0.174531  | 0.296000  |
| C | -3.103419 | -0.387264 | 1.375491  |
| H | -4.141605 | -0.228740 | 1.067829  |
| H | -2.936566 | -1.452247 | 1.551745  |
| H | -2.919409 | 0.130885  | 2.321391  |
| C | -2.501082 | 1.650744  | 0.006925  |
| H | -2.541121 | 2.185854  | 0.962395  |
| H | -1.736092 | 2.156958  | -0.600927 |
| H | -3.485397 | 1.722383  | -0.474497 |
| S | -2.501948 | -0.732340 | -1.348828 |
| C | -1.879588 | -2.407614 | -0.973261 |
| H | -0.850128 | -2.357992 | -0.609764 |
| H | -2.502226 | -2.927911 | -0.238613 |
| H | -1.898188 | -2.969102 | -1.912353 |
| O | 0.329675  | 2.024129  | 0.472260  |
| O | 0.278450  | 2.916307  | -0.687407 |



## PBN-CH2NHCOMe-O2c.out

37

|   |           |           |           |
|---|-----------|-----------|-----------|
| C | 4.594037  | -1.198652 | 0.379106  |
| C | 3.227774  | -0.982273 | 0.552529  |
| C | 2.629375  | 0.208554  | 0.120204  |
| C | 3.429333  | 1.178304  | -0.490151 |
| C | 4.797318  | 0.960495  | -0.673079 |
| C | 5.387314  | -0.226776 | -0.237650 |
| H | 5.041256  | -2.130543 | 0.720720  |
| H | 2.609981  | -1.746757 | 1.015746  |
| H | 2.954708  | 2.099068  | -0.810403 |
| H | 5.404419  | 1.724933  | -1.154877 |
| H | 6.453770  | -0.395325 | -0.375558 |
| C | 1.158105  | 0.499081  | 0.398062  |
| N | 0.346092  | -0.706711 | -0.014747 |
| O | 0.678578  | -1.267502 | -1.134496 |
| C | -1.112101 | -0.803752 | 0.333571  |
| C | -1.501712 | -2.280875 | 0.160550  |
| H | -2.559909 | -2.421466 | 0.406207  |
| H | -0.908352 | -2.907603 | 0.837098  |
| C | -1.356567 | -0.345167 | 1.776689  |
| H | -0.771484 | -0.948588 | 2.484945  |
| H | -1.092035 | 0.715540  | 1.858296  |
| C | -1.873485 | 0.124286  | -0.666673 |
| H | -1.395259 | 0.005639  | -1.643912 |
| H | -1.738148 | 1.164350  | -0.328491 |
| N | -3.289478 | -0.205826 | -0.838821 |
| H | -3.499499 | -0.975970 | -1.457195 |
| C | -4.345706 | 0.366323  | -0.198510 |
| O | -4.266501 | 1.262379  | 0.633097  |
| C | -5.714742 | -0.196068 | -0.602286 |
| H | -6.325294 | 0.622038  | -0.998475 |
| H | -5.674945 | -0.998309 | -1.348089 |
| H | -6.218523 | -0.572263 | 0.294187  |
| H | -2.418539 | -0.460171 | 2.020794  |
| H | 1.006670  | 0.627098  | 1.476768  |
| O | 0.750374  | 1.650764  | -0.237410 |
| O | -0.270745 | 2.327384  | 0.579397  |
| H | -1.312415 | -2.618987 | -0.861652 |

## PBN-NHCOMe-O2c.out

34

|   |           |           |           |
|---|-----------|-----------|-----------|
| C | 3.673399  | 0.744442  | 1.471075  |
| C | 2.325805  | 0.618873  | 1.138465  |
| C | 1.925940  | -0.201682 | 0.074949  |
| C | 2.902529  | -0.891945 | -0.647439 |
| C | 4.254774  | -0.760385 | -0.320040 |
| C | 4.646621  | 0.055969  | 0.740815  |
| H | 3.966216  | 1.386305  | 2.299672  |
| H | 1.574582  | 1.167726  | 1.698190  |
| H | 2.580210  | -1.531934 | -1.460982 |
| H | 5.002751  | -1.302726 | -0.895401 |
| H | 5.699049  | 0.155945  | 0.999337  |
| C | 0.451375  | -0.422414 | -0.233204 |
| N | -0.254975 | 0.915320  | -0.289543 |
| O | 0.402672  | 1.944030  | -0.697145 |
| C | -1.757069 | 0.947565  | -0.542755 |
| N | -2.320400 | -0.307887 | -0.089943 |
| H | -1.873635 | -1.132840 | -0.658028 |
| C | -2.801737 | -0.607698 | 1.145496  |
| O | -3.067299 | 0.177100  | 2.061997  |
| C | -3.054543 | -2.111184 | 1.307109  |
| H | -4.040059 | -2.371889 | 0.900129  |
| H | -2.298524 | -2.692060 | 0.767293  |
| H | -3.046959 | -2.358606 | 2.371993  |
| C | -1.964855 | 1.021238  | -2.070168 |
| H | -1.651130 | 0.079678  | -2.528043 |
| H | -3.025789 | 1.191955  | -2.288432 |
| H | -1.371865 | 1.844493  | -2.478850 |

|   |           |           |           |
|---|-----------|-----------|-----------|
| H | -0.008694 | -0.982747 | 0.587516  |
| C | -2.310165 | 2.204155  | 0.137734  |
| H | -1.817836 | 3.079300  | -0.294880 |
| H | -3.389155 | 2.269158  | -0.037172 |
| H | -2.145159 | 2.174764  | 1.213673  |
| O | 0.292520  | -1.153268 | -1.405333 |
| O | -0.862746 | -2.069132 | -1.303500 |

PBN-O2.log

30

|   |           |           |           |
|---|-----------|-----------|-----------|
| C | 3.210144  | -1.470961 | 0.484365  |
| C | 1.860591  | -1.126078 | 0.544523  |
| C | 1.426541  | 0.147539  | 0.152868  |
| C | 2.375435  | 1.067252  | -0.302607 |
| C | 3.727400  | 0.721270  | -0.372801 |
| C | 4.152798  | -0.547546 | 0.022941  |
| H | 3.527521  | -2.465860 | 0.792271  |
| H | 1.127689  | -1.852338 | 0.884338  |
| H | 2.026568  | 2.051576  | -0.594036 |
| H | 4.451348  | 1.449323  | -0.735053 |
| H | 5.206463  | -0.816453 | -0.026752 |
| C | -0.029032 | 0.575890  | 0.318890  |
| H | -0.255123 | 0.676633  | 1.388285  |
| N | -0.916644 | -0.531088 | -0.203857 |
| O | -0.545501 | -1.101069 | -1.304407 |
| C | -2.401009 | -0.520632 | 0.047684  |
| C | -2.688769 | -0.058830 | 1.483552  |
| H | -3.768286 | -0.128577 | 1.673926  |
| H | -2.176397 | -0.694954 | 2.219052  |
| H | -2.364507 | 0.984904  | 1.586209  |
| C | -3.057686 | 0.452128  | -0.951294 |
| H | -2.698171 | 1.467105  | -0.721225 |
| H | -2.782748 | 0.169414  | -1.973769 |
| H | -4.152610 | 0.409322  | -0.856284 |
| C | -2.895177 | -1.960426 | -0.165636 |
| H | -2.429958 | -2.646060 | 0.555062  |
| H | -3.982572 | -2.002739 | -0.025870 |
| H | -2.648368 | -2.304847 | -1.172278 |
| O | -0.252580 | 1.790989  | -0.287995 |
| O | -1.295888 | 2.528022  | 0.449679  |

PBN-alpha-2CH2OH-O2.com.log

32

|   |           |           |           |
|---|-----------|-----------|-----------|
| C | -3.530630 | -1.681280 | 0.662271  |
| C | -2.230411 | -1.178010 | 0.646967  |
| C | -1.965584 | 0.111835  | 0.169037  |
| C | -3.031864 | 0.888324  | -0.293233 |
| C | -4.334401 | 0.383559  | -0.286987 |
| C | -4.591366 | -0.901604 | 0.192958  |
| H | -3.716852 | -2.685983 | 1.037493  |
| H | -1.404992 | -1.792282 | 0.997006  |
| H | -2.815560 | 1.889561  | -0.648105 |
| H | -5.152359 | 1.000425  | -0.654866 |
| H | -5.606804 | -1.293224 | 0.203273  |
| C | -0.562486 | 0.704358  | 0.245606  |
| H | -0.267496 | 0.813045  | 1.297891  |
| N | 0.405496  | -0.292490 | -0.362634 |
| O | 0.036847  | -0.843191 | -1.475558 |
| C | 1.888281  | -0.168576 | -0.169828 |
| C | 2.442518  | 0.886817  | -1.142294 |
| H | 3.523040  | 1.022120  | -0.997248 |
| H | 2.237988  | 0.590722  | -2.178188 |
| H | 1.934336  | 1.839057  | -0.898866 |
| C | 2.194689  | 0.236428  | 1.292505  |
| H | 1.809870  | 1.249374  | 1.446041  |
| H | 1.668259  | -0.462388 | 1.970472  |
| C | 2.441327  | -1.583130 | -0.470498 |
| O | 3.880658  | -1.659272 | -0.391289 |

H 4.214463 -0.987593 -1.008691  
H 2.094575 -1.902732 -1.456990  
H 2.073504 -2.299031 0.273133  
O 3.592190 0.255190 1.580457  
H 3.963534 -0.549371 1.173713  
O -0.521627 1.935955 -0.356654  
O 0.547630 2.739244 0.255962

PBN-alpha-2COOH-O2.com.log

30

C 3.981634 1.481488 0.161452  
C 2.636608 1.177133 0.365958  
C 2.172961 -0.134502 0.202727  
C 3.077411 -1.132195 -0.173961  
C 4.424047 -0.824932 -0.384018  
C 4.882462 0.481451 -0.214552  
H 4.325996 2.505817 0.287320  
H 1.934627 1.959262 0.634945  
H 2.712333 -2.144703 -0.304948  
H 5.114492 -1.611367 -0.681858  
H 5.931172 0.721428 -0.377678  
C 0.735497 -0.497018 0.523099  
H 0.612682 -0.570974 1.613024  
N -0.216514 0.544308 0.071169  
O 0.021645 1.127474 -1.056023  
C -1.642225 0.267892 0.389096  
C -1.887580 0.268554 1.911018  
H -1.439761 -0.615982 2.363740  
H -1.486675 1.182490 2.361883  
H -2.963786 0.221817 2.097273  
C -2.419609 1.476973 -0.162317  
O -2.249479 2.616285 0.228951  
O -3.399206 1.182147 -1.040760  
H -3.803644 2.048933 -1.236449  
O 0.418967 -1.738397 -0.049015  
O -0.891581 -2.088716 0.484645  
C -1.995546 -1.123409 -0.301480  
O -1.946207 -1.214222 -1.537147  
O -3.162271 -1.634083 0.368551  
H -3.550751 -2.159402 -0.351174

PBN-CH2CONH2-2-O2b.out

38

C 4.048327 -1.061268 1.339010  
C 2.696516 -0.759101 1.161704  
C 2.268671 -0.060271 0.027810  
C 3.212021 0.344653 -0.925152  
C 4.563045 0.044597 -0.742553  
C 4.987186 -0.660744 0.386516  
H 4.366137 -1.616762 2.219361  
H 1.969146 -1.088197 1.897857  
H 2.852234 0.926036 -1.769543  
H 5.290107 0.365378 -1.486346  
H 6.040939 -0.896208 0.524165  
C 0.816370 0.353029 -0.188638  
N -0.132607 -0.651448 0.321006  
O 0.136972 -1.895452 0.106535  
C -1.503800 -0.254712 0.816993  
C -1.343723 0.157899 2.294138  
H -2.286418 0.550089 2.683287  
H -0.600943 0.952619 2.404367  
C -2.138262 0.875333 -0.059959  
H -1.855287 0.701806 -1.099010  
H -3.223372 0.757131 0.024659  
C -2.429971 -1.502512 0.769251  
H -1.889607 -2.353466 1.192413  
H -3.296076 -1.282694 1.398016  
C -3.002207 -1.878282 -0.602234  
O -4.188060 -1.707107 -0.876192

N -2.116119 -2.443799 -1.469499  
H -2.412510 -2.525537 -2.432248  
H -1.122775 -2.389619 -1.253688  
C -1.868776 2.331087 0.351414  
O -2.419996 2.801467 1.357440  
N -1.070481 3.040041 -0.474591  
H -0.880810 3.977515 -0.135084  
H -0.332291 2.604122 -1.150629  
H 0.627382 1.284191 0.357156  
O 0.494819 0.554845 -1.544641  
O 0.873862 1.939818 -1.877060  
H -1.024557 -0.706770 2.888386

PBN-CH2COOMe-2-O2.com.log

- 42

C -4.415128 0.264843 1.412287  
C -3.065976 0.014366 1.167472  
C -2.674593 -0.844101 0.131408  
C -3.661370 -1.445978 -0.653486  
C -5.014066 -1.189441 -0.414642  
C -5.397712 -0.335765 0.619792  
H -4.701205 0.935390 2.220366  
H -2.305466 0.498367 1.773314  
H -3.345340 -2.116953 -1.444237  
H -5.769794 -1.663450 -1.038142  
H -6.451132 -0.138989 0.809521  
C -1.210914 -1.212951 -0.078328  
N -0.380140 0.060448 -0.075231  
O -0.914511 1.115328 -0.593811  
C 1.121529 0.001991 -0.196042  
C 1.593832 -1.198552 0.660731  
H 1.113857 -1.163335 1.644441  
H 1.185799 -2.101153 0.109921  
C 1.479386 -0.162123 -1.685125  
H 1.191318 -1.173571 -1.990965  
H 0.936391 0.583574 -2.269476  
H 2.551169 -0.018758 -1.840798  
C 1.670322 1.320510 0.420319  
H 2.760701 1.285354 0.323964  
H 1.414403 1.351093 1.483656  
C -0.098583 4.532235 0.045756  
H 0.676074 5.191968 -0.358469  
H -0.786338 4.257118 -0.759453  
H -0.640795 5.030433 0.852681  
O 0.471205 3.359507 0.625529  
C 1.214936 2.608174 -0.233364  
O 1.539374 3.004226 -1.333942  
C 3.050413 -1.390903 0.941970  
O 3.504585 -1.821722 1.988057  
O 3.867937 -1.103871 -0.114749  
C 5.252736 -1.374248 0.101199  
H 5.756904 -1.086400 -0.823688  
H 5.642095 -0.794327 0.944214  
H 5.415718 -2.436591 0.308365  
H -0.865423 -1.814187 0.771013  
O -1.040612 -1.950702 -1.228780  
O 0.048669 -2.924899 -1.045966

PBN-CH2NHCOMe-2-O2.com.log

44

C -4.785395 1.621041 0.203745  
C -3.470778 1.177383 0.363830  
C -3.133362 -0.147883 0.065256  
C -4.130254 -1.018648 -0.394268  
C -5.443396 -0.573085 -0.551325  
C -5.776797 0.749997 -0.252974  
H -5.033453 2.656694 0.428899  
H -2.691740 1.859227 0.680959  
H -3.856306 -2.046217 -0.614202

H -6.207296 -1.260873 -0.908772  
H -6.799531 1.100493 -0.378787  
C -1.752803 -0.735617 0.305398  
N -0.698251 0.252627 0.384387  
O -0.734215 1.205340 -0.576252  
C 0.683545 -0.199562 0.750248  
C 1.392337 1.038866 1.369706  
H 2.397897 0.776438 1.704291  
H 0.808546 1.350358 2.244933  
C 0.647919 -1.305067 1.813841  
H 0.128503 -0.968598 2.720816  
H 0.155106 -2.202912 1.427500  
C 1.432093 -0.702918 -0.522924  
H 1.139497 -0.047116 -1.349204  
H 1.113455 -1.719630 -0.753553  
N 2.884861 -0.709920 -0.380353  
H 3.353513 0.181568 -0.238357  
C 3.655036 -1.831156 -0.393048  
O 3.231022 -2.974700 -0.539392  
C 5.151958 -1.564211 -0.218891  
H 5.676782 -1.886376 -1.125237  
H 5.391195 -0.514558 -0.021419  
H 5.523494 -2.180607 0.606281  
N 1.490876 2.166267 0.450183  
H 0.603705 2.254682 -0.078185  
C 2.655711 2.571466 -0.096636  
O 3.773958 2.130229 0.218234  
C 2.529797 3.661728 -1.153232  
H 1.492361 3.925198 -1.377320  
H 3.060379 4.555654 -0.806702  
H 3.024278 3.324871 -2.070109  
H 1.674927 -1.572169 2.087146  
H -1.775134 -1.304368 1.236788  
O -1.441919 -1.704617 -0.713033  
O -1.435878 -2.993574 -0.180511

PBN-CH2OCOMe-2-O2.com.log

42

C -3.298892 -3.021864 -0.284675  
C -2.216401 -2.280032 0.191175  
C -2.217665 -0.879757 0.069987  
C -3.320775 -0.259438 -0.529783  
C -4.400470 -1.003557 -1.011610  
C -4.391448 -2.393362 -0.889081  
H -3.288868 -4.105733 -0.183041  
H -1.362500 -2.743104 0.662263  
H -3.338041 0.826045 -0.618494  
H -5.245064 -0.497858 -1.476294  
H -5.229039 -2.982146 -1.259470  
C -1.091217 -0.007958 0.590872  
N 0.176246 -0.292909 -0.097769  
O 0.600789 -1.543316 0.165113  
C 1.306050 0.680825 0.075145  
C 2.435734 0.141611 -0.865298  
H 2.999972 0.988548 -1.278600  
H 1.972719 -0.400186 -1.689384  
C 0.932815 2.042147 -0.549917  
H 0.433986 1.860058 -1.510310  
H 1.848035 2.620326 -0.723233  
C 1.812715 0.812640 1.520091  
H 1.799434 -0.184420 1.965672  
H 1.148879 1.454539 2.099574  
O 3.431623 -0.643392 -0.204327  
O 0.073550 2.826176 0.303566  
C 3.629238 -1.970181 -0.430594  
O 4.486369 -2.529417 0.217981  
C -0.387886 4.035492 -0.089793  
O -1.060607 4.692353 0.671964  
C -0.043386 4.513116 -1.492195  
H 1.039761 4.568443 -1.645915

H -0.445500 3.833293 -2.251447  
H -0.480033 5.503356 -1.625886  
C 2.811652 -2.661182 -1.499269  
H 1.748570 -2.571177 -1.240145  
H 2.977516 -2.209910 -2.485781  
H 3.122894 -3.706561 -1.530696  
H 2.834473 1.211536 1.549975  
H -1.345784 1.040536 0.419758  
O -0.921893 -0.067466 2.008223  
O -0.583022 -1.353217 2.421918

PBN-CH2OMe-2-O2.com.log

38

C -4.105151 1.741576 0.121173  
C -2.807243 1.282399 0.340827  
C -2.482087 -0.067243 0.150963  
C -3.485466 -0.946661 -0.264970  
C -4.784952 -0.487485 -0.494347  
C -5.102532 0.857335 -0.300115  
H -4.338712 2.793906 0.273125  
H -2.030203 1.975510 0.650890  
H -3.222147 -1.990010 -0.397343  
H -5.552709 -1.186075 -0.822343  
H -6.115651 1.215299 -0.473905  
C -1.094942 -0.603814 0.491425  
N -0.063076 0.312886 -0.123730  
O -0.299707 0.751116 -1.321101  
C 1.388987 0.200297 0.231663  
C 2.013249 1.536560 -0.236930  
H 2.125815 1.537654 -1.329075  
H 1.329487 2.361660 0.024943  
C 1.567121 -0.003334 1.739857  
H 1.103849 0.815404 2.306874  
H 1.111347 -0.962572 2.010466  
H 2.634917 -0.020636 1.968203  
C 1.932345 -1.017866 -0.544180  
H 1.689607 -0.888204 -1.611763  
H 1.424781 -1.912338 -0.140476  
C 3.837561 -2.350947 -0.825365  
H 3.670621 -2.498808 -1.908727  
H 4.917950 -2.370286 -0.636499  
H 3.364356 -3.194697 -0.297484  
O 3.352281 -1.112410 -0.378691  
O 3.273678 1.750150 0.386654  
C 3.905631 2.904148 -0.092205  
H 4.860039 3.001374 0.436895  
H 4.106916 2.849145 -1.176833  
H 3.306411 3.815792 0.089666  
H -0.941794 -0.560168 1.576598  
O -0.960767 -1.914409 0.088655  
O -0.077795 -2.629690 1.026499

PBN-CH2OCONHMe-2-O2.com.log

C -4.416431 -0.968010 -0.097044  
C -3.053711 -1.050742 -0.367910  
C -2.261624 0.119580 -0.406224  
C -2.889169 1.362053 -0.148878  
C -4.249852 1.427615 0.134018  
C -5.026098 0.265822 0.156143  
H -5.011881 -1.879356 -0.082119  
H -2.570142 -1.998021 -0.566352  
H -2.284672 2.261735 -0.138956  
H -4.707719 2.393399 0.338266  
H -6.092279 0.320382 0.367349  
C -0.843788 0.158740 -0.705531  
N -0.077140 -0.879876 -1.026224  
O -0.451089 -2.167065 -0.904355  
C 1.338031 -0.738100 -1.433763  
C 1.589389 -1.561456 -2.692326

H 1.246030 -2.579466 -2.515007  
H 1.035451 -1.122855 -3.526423  
H 2.659134 -1.545017 -2.914890  
C 1.839876 1.713119 -0.973894  
O 1.355710 2.765933 -1.347665  
O 1.653113 0.592712 -1.793860  
N 2.627848 1.560976 0.107335  
H 2.919716 0.637340 0.413726  
C 2.647196 2.615371 1.113207  
H 1.652871 2.756877 1.551001  
H 3.346434 2.313807 1.896923  
H 2.983487 3.557082 0.668613  
O 2.253114 -1.243013 -0.450402  
C 2.064175 -1.391255 0.929503  
O 2.921242 -0.906798 1.661077  
N 1.025437 -2.143589 1.302057  
H 0.325801 -2.360433 0.555781  
C 0.624969 -2.140483 2.699665  
H -0.209060 -2.837863 2.818472  
H 1.455251 -2.463647 3.335995  
H 0.305686 -1.136727 3.003630  
H -0.428872 1.129824 -0.921442  
O -0.243860 0.775687 1.471382  
O -0.717734 1.922148 1.837755

PBN-CH2POOMe-2-O2.com.log

52

C 5.490950 -0.114113 -0.089437  
C 4.236516 -0.597787 -0.465044  
C 3.241620 -0.798051 0.507147  
C 3.536445 -0.495300 1.842539  
C 4.788438 0.000403 2.214814  
C 5.773307 0.191002 1.245195  
H 6.256441 0.031087 -0.849736  
H 3.995438 -0.850882 -1.487058  
H 2.773342 -0.645752 2.604474  
H 4.991687 0.232936 3.258411  
H 6.752760 0.574261 1.526359  
C 1.869748 -1.357986 0.178852  
N 1.052768 -0.391410 -0.578248  
O 1.642322 -0.037434 -1.722801  
C -0.416451 -0.720975 -0.804590  
C -0.581612 -1.784813 -1.909489  
H -1.546878 -1.685366 -2.416084  
H 0.239349 -1.655145 -2.618823  
H -0.504437 -2.792080 -1.495522  
C -1.030984 -1.179716 0.542314  
H -0.637004 -2.171104 0.788840  
H -0.726482 -0.488841 1.338184  
C -1.013882 0.611466 -1.319710  
H -2.092559 0.524150 -1.472450  
H -0.534856 0.829288 -2.277391  
H 1.357907 -1.567401 1.122239  
P -0.755737 2.087981 -0.275286  
O -1.958998 3.021984 -0.876548  
O 0.502124 2.947761 -0.819389  
C 1.848281 2.713306 -0.347169  
H 2.271870 1.867192 -0.892333  
H 2.400020 3.636060 -0.549281  
H 1.847207 2.512002 0.727437  
C -2.074995 4.361457 -0.396762  
H -2.088620 4.387241 0.699022  
H -1.245962 4.977416 -0.762129  
H -3.020449 4.754986 -0.780770  
O -0.792213 1.927389 1.211951  
P -2.821663 -1.370212 0.792816  
O -3.176609 -2.043350 2.075311  
O -3.565148 0.069756 0.604107  
O -3.332943 -2.120657 -0.553628  
C -4.704879 -2.520148 -0.625677

H -4.805719 -3.128887 -1.527304  
H -4.984096 -3.110046 0.253470  
H -5.356768 -1.642461 -0.699527  
C -3.814945 0.892281 1.760683  
H -4.170657 0.278500 2.593105  
H -2.901347 1.426464 2.033157  
H -4.589187 1.605631 1.465014  
O 1.882278 -2.618574 -0.477450  
O 2.514847 -2.538384 -1.728867

PBN-CH2SMe-2-O2.com.log

38

C -4.447492 -1.708168 -0.797347  
C -3.133370 -1.244590 -0.803501  
C -2.797131 -0.038605 -0.173506  
C -3.804343 0.694681 0.457199  
C -5.121864 0.228346 0.470580  
C -5.449991 -0.973525 -0.156451  
H -4.690856 -2.648312 -1.288884  
H -2.355718 -1.827336 -1.288691  
H -3.530567 1.634673 0.923432  
H -5.894250 0.811196 0.968957  
H -6.476185 -1.336006 -0.150327  
C -1.388846 0.542623 -0.261922  
H -1.182155 0.805832 -1.304708  
N -0.384237 -0.518538 0.143006  
O -0.777271 -1.445612 0.951776  
C 1.103407 -0.190466 0.214896  
C 1.771285 -1.561114 -0.054900  
H 1.383951 -2.276042 0.674523  
H 1.477051 -1.901570 -1.055414  
C 1.435533 0.848497 -0.881465  
H 1.487729 0.353221 -1.858101  
H 0.655706 1.637057 -0.905710  
C 1.386274 0.312419 1.640939  
H 1.004980 -0.423260 2.355464  
H 0.865857 1.258801 1.799866  
S 3.613855 -1.590586 0.041059  
S 3.014548 1.784118 -0.700478  
C 3.808525 -3.407065 -0.051090  
H 4.879518 -3.625518 0.002419  
H 3.303689 -3.905397 0.784062  
H 3.416837 -3.806880 -0.993316  
C 2.422798 3.246799 0.253106  
H 1.322610 3.288280 0.183325  
H 2.728489 3.172993 1.301772  
H 2.864715 4.147129 -0.186142  
H 2.458788 0.447493 1.802118  
O -1.244845 1.696702 0.491260  
O -0.702096 2.777398 -0.362312

PBN-CONH2-2-O2b.out

32

C 3.637410 -1.871105 -0.176744  
C 2.326671 -1.407827 -0.033651  
C 2.079495 -0.041395 0.130216  
C 3.156479 0.855574 0.158289  
C 4.463322 0.388237 0.020423  
C 4.709070 -0.977187 -0.150963  
H 3.819306 -2.935173 -0.315603  
H 1.494143 -2.100996 -0.073107  
H 2.933252 1.908309 0.311128  
H 5.293555 1.091499 0.045796  
H 5.728544 -1.341364 -0.263926  
C 0.703486 0.554743 0.373087  
O -0.269049 -0.798241 -1.310144  
C -1.799244 -0.029049 0.330746  
C -1.871704 0.840402 1.595968  
H -1.472931 0.293710 2.457106



H -1.317557 1.778527 1.473747  
H -2.923753 1.046409 1.806249  
C -2.580620 0.682084 -0.828504  
N -2.006825 1.829196 -1.255133  
H -2.423342 2.271038 -2.062159  
H -1.040478 2.051291 -0.986274  
O -3.651255 0.247847 -1.244492  
C -2.525816 -1.386317 0.602604  
O -3.337783 -1.508575 1.511776  
N -2.168052 -2.404624 -0.220919  
H -2.734254 -3.239976 -0.194612  
H -1.571214 -2.188095 -1.016137  
H 0.569981 0.709789 1.444467  
O 0.594778 1.836812 -0.225220  
O 0.643125 2.854033 0.810066  
N -0.394420 -0.288707 -0.108433

PBN-COOMe-2-O2.com.log

36

C 4.354412 -1.027077 -0.684867  
C 3.003046 -0.806933 -0.964927  
C 2.264728 0.110398 -0.207426  
C 2.903801 0.831356 0.811655  
C 4.255233 0.611029 1.082470  
C 4.985098 -0.322810 0.342018  
H 4.913226 -1.754923 -1.270898  
H 2.517601 -1.369114 -1.754366  
H 2.318553 1.599116 1.313789  
H 4.744324 1.177603 1.873312  
H 6.038667 -0.494445 0.557373  
C 0.810712 0.472797 -0.482295  
H 0.761974 1.142279 -1.353699  
N -0.055665 -0.718325 -0.787281  
O 0.365422 -1.928792 -0.794067  
C -1.537413 -0.556426 -0.823407  
C -2.060568 -1.187789 -2.124199  
H -3.152505 -1.218665 -2.115309  
H -1.715432 -0.587326 -2.968791  
H -1.671187 -2.204912 -2.207950  
C -2.555945 2.745316 0.526240  
H -1.493335 3.029387 0.605094  
H -3.064999 3.292113 -0.274447  
H -3.092412 2.871650 1.469787  
C -1.895140 0.948771 -0.818004  
O -1.646060 1.664379 -1.765227  
O -2.596709 1.319593 0.263693  
C -2.179028 -1.273967 0.381620  
O -3.271779 -1.805111 0.344120  
O -1.406401 -1.245712 1.474363  
C -1.972293 -1.847741 2.638223  
H -2.185486 -2.907259 2.463841  
H -1.220800 -1.731627 3.420327  
H -2.901075 -1.342470 2.920619  
O 0.184900 1.113465 0.578794  
O 0.537212 2.550343 0.494533

PBN-NHCOMe-2-O2.com.log

38

C -3.663391 -1.701501 1.363462  
C -2.445714 -1.117188 1.021236  
C -2.391302 -0.096862 0.061400  
C -3.576610 0.322680 -0.548020  
C -4.796571 -0.269681 -0.210015  
C -4.845904 -1.281993 0.747270  
H -3.688387 -2.492861 2.109395  
H -1.528273 -1.456662 1.490082  
H -3.530682 1.115690 -1.285603  
H -5.709676 0.066338 -0.697015  
H -5.795382 -1.742224 1.012629

C -1.078203 0.610303 -0.236074  
N 0.031738 -0.358694 -0.401106  
O -0.228969 -1.537096 -0.832291  
C 1.481958 0.155888 -0.579654  
N 1.536569 1.518834 -0.118806  
H 0.364015 2.401905 -0.890792  
C 1.778836 1.818836 1.163441  
O 2.046865 1.049367 2.126040  
C 1.737486 3.324997 1.448828  
H 2.653852 3.804554 1.081816  
H 0.890391 3.799242 0.941485  
H 1.665489 3.489622 2.527496  
N 2.332541 -0.740317 0.194668  
H 2.352436 -0.431766 1.172421  
C 2.993166 -1.870950 -0.165942  
O 3.100507 -2.348243 -1.293438  
C 3.656039 -2.573815 1.026215  
H 3.017370 -3.405698 1.347375  
H 4.610584 -2.994370 0.697664  
H 3.819596 -1.914288 1.884774  
C 1.787089 0.118312 -2.082084  
H 1.145535 0.851388 -2.577600  
H 2.833938 0.392605 -2.241155  
H 1.614462 -0.877318 -2.485989  
H -0.821359 1.267508 0.596381  
O -1.220527 1.432854 -1.393710  
O -0.575518 2.722294 -1.164981

PBN-OCOMe-2-O2.com.log

36

C -3.865939 0.987999 1.595839  
C -2.601662 0.565011 1.187370  
C -2.453063 -0.255896 0.062258  
C -3.593947 -0.643353 -0.646249  
C -4.860642 -0.215826 -0.241053  
C -5.003137 0.600189 0.881774  
H -3.964249 1.626993 2.471395  
H -1.716621 0.875597 1.734268  
H -3.465385 -1.279586 -1.514937  
H -5.738853 -0.523696 -0.805474  
H -5.989738 0.932535 1.198982  
C -1.091435 -0.805973 -0.343528  
H -0.785866 -1.623541 0.315637  
N -0.069583 0.275562 -0.175335  
O -0.298652 1.432451 -0.736997  
C 1.371642 -0.092565 -0.196175  
C 1.805604 -0.541024 -1.575997  
H 1.248108 -1.472084 -1.805341  
H 1.510626 0.235167 -2.283085  
H 2.885692 -0.681627 -1.646781  
C 2.238264 2.204298 -0.359114  
O 2.723245 2.255043 -1.463135  
O 2.042525 1.049224 0.365100  
C 1.888846 3.401676 0.492486  
H 0.801424 3.411250 0.611134  
H 2.338793 3.310670 1.486939  
H 2.226162 4.318950 0.005583  
O 1.475885 -1.094753 0.816239  
C 2.619453 -1.641477 1.306044  
O 2.524921 -2.402643 2.242304  
C 3.957249 -1.311563 0.673124  
H 4.083299 -1.902576 -0.240148  
H 4.046740 -0.256737 0.411744  
H 4.734958 -1.598807 1.383378  
O -1.119574 -1.305122 -1.643145  
O -0.372776 -2.535501 -1.719944

PBN-OCONHMe-2-O2.com.log

40

C -4.416431 -0.968010 -0.097044  
C -3.053711 -1.050742 -0.367910  
C -2.261624 0.119580 -0.406224  
C -2.889169 1.362053 -0.148878  
C -4.249852 1.427615 0.134018  
C -5.026098 0.265822 0.156143  
H -5.011881 -1.879356 -0.082119  
H -2.570142 -1.998021 -0.566352  
H -2.284672 2.261735 -0.138956  
H -4.707719 2.393399 0.338266  
H -6.092279 0.320382 0.367349  
C -0.843788 0.158740 -0.705531  
N -0.077140 -0.879876 -1.026224  
O -0.451089 -2.167065 -0.904355  
C 1.338031 -0.738100 -1.433763  
C 1.589389 -1.561456 -2.692326  
H 1.246030 -2.579466 -2.515007  
H 1.035451 -1.122855 -3.526423  
H 2.659134 -1.545017 -2.914890  
C 1.839876 1.713119 -0.973894  
O 1.355710 2.765933 -1.347665  
O 1.653113 0.592712 -1.793860  
N 2.627848 1.560976 0.107335  
H 2.919716 0.637340 0.413726  
C 2.647196 2.615371 1.113207  
H 1.652871 2.756877 1.551001  
H 3.346434 2.313807 1.896923  
H 2.983487 3.557082 0.668613  
O 2.253114 -1.243013 -0.450402  
C 2.064175 -1.391255 0.929503  
O 2.921242 -0.906798 1.661077  
N 1.025437 -2.143589 1.302057  
H 0.325801 -2.360433 0.555781  
C 0.624969 -2.140483 2.699665  
H -0.209060 -2.837863 2.818472  
H 1.455251 -2.463647 3.335995  
H 0.305686 -1.136727 3.003630  
H -0.428872 1.129824 -0.921442  
O -0.243860 0.775687 1.471382  
O -0.717734 1.922148 1.837755

PBN-OMe-2-O2.com.log

32

C 3.641909 -1.168552 0.829568  
C 2.303957 -0.814054 1.021476  
C 1.722796 0.219527 0.279671  
C 2.503866 0.894571 -0.668100  
C 3.839815 0.545144 -0.858592  
C 4.415352 -0.488601 -0.112348  
H 4.079229 -1.973483 1.417564  
H 1.699301 -1.345149 1.754039  
H 2.043595 1.694176 -1.236399  
H 4.437241 1.078489 -1.595797  
H 5.458183 -0.760575 -0.264825  
C 0.271255 0.603500 0.496805  
N -0.578107 -0.129573 -0.526571  
O -0.265992 -0.006993 -1.765568  
C -1.788150 -0.956580 -0.234387  
C -1.576628 -2.356578 -0.815676  
H -2.510380 -2.919822 -0.728998  
H -1.288727 -2.266718 -1.864415  
H -0.788119 -2.873864 -0.260685  
C -2.985584 0.972996 -1.171821  
H -2.609757 1.118905 -2.191797  
H -4.048712 1.240723 -1.134490  
H -2.398387 1.591407 -0.467480  
O -2.937757 -0.432202 -0.843228  
O -1.937375 -1.135084 1.155897  
C -2.693796 -0.143266 1.870813  
H -3.729896 -0.124582 1.510298

H -2.683900 -0.482253 2.912844  
H -2.226302 0.850350 1.770976  
H -0.077747 0.240272 1.468465  
O 0.155080 1.964616 0.391491  
O -1.168660 2.358475 0.907940

PBN-POOMe-2-O2b.com.log

46

C -1.708243 -0.391747 -0.785390  
N -0.553889 0.115155 -0.213963  
O -0.444489 1.521064 -0.012811  
C 0.800768 -0.220076 -0.655745  
C 0.978928 -0.565103 -2.145929  
H 0.464852 -1.495045 -2.408752  
H 0.580047 0.249900 -2.753680  
H 2.044040 -0.669831 -2.369000  
H -1.569273 -1.459643 -0.956338  
P 1.445821 1.549676 -0.322328  
O 3.040779 0.921371 -0.470336  
O 1.741100 1.930263 1.263971  
C 0.838096 2.748672 1.993249  
H 1.404089 3.150491 2.843118  
H 0.465239 3.583100 1.387872  
H -0.015066 2.169112 2.357330  
C 4.114511 1.835980 -0.475221  
H 4.254259 2.298210 0.513246  
H 5.029512 1.283140 -0.730874  
H 3.955032 2.631817 -1.213800  
O 1.427825 2.673975 -1.321005  
P 1.327189 -1.656233 0.389647  
O 0.665704 -2.925933 -0.045726  
O 1.001695 -1.175025 1.897923  
O 2.943918 -1.808139 0.522152  
C 3.734868 -2.225747 -0.588467  
H 3.213119 -2.979798 -1.189107  
H 3.988055 -1.355150 -1.200336  
H 4.650576 -2.665975 -0.181261  
C 1.190026 -2.106553 2.962944  
H 2.257805 -2.270162 3.147757  
H 0.729066 -1.664437 3.849810  
H 0.707045 -3.063619 2.736690  
O -1.936099 0.120997 -2.298392  
O -2.523831 -0.811577 -3.015480  
C -3.012073 -0.105615 -0.086284  
C -3.239718 1.058177 0.662712  
C -4.048748 -1.041167 -0.218571  
C -4.477062 1.266090 1.273406  
H -2.432525 1.775380 0.757424  
C -5.285923 -0.826861 0.388772  
H -3.880982 -1.935096 -0.811925  
C -5.504117 0.329076 1.140322  
H -4.639545 2.170192 1.856554  
H -6.077338 -1.564952 0.276946  
H -6.466638 0.497908 1.619134

PBN-SMe-2-O2-b.com.log

32

C 3.701342 -1.718815 0.807157  
C 2.416236 -1.186968 0.937127  
C 2.094359 0.057290 0.383146  
C 3.082563 0.773489 -0.304408  
C 4.368378 0.245320 -0.425674  
C 4.684529 -1.001192 0.124059  
H 3.934374 -2.689111 1.242774  
H 1.649849 -1.746454 1.471057  
H 2.781797 1.727501 -0.729756  
H 5.131262 0.807951 -0.961591  
H 5.688419 -1.409998 0.020237  
C 0.700141 0.627608 0.606193

H 0.373727 0.369633 1.619960  
N -0.245775 -0.007881 -0.350228  
O 0.131482 0.173503 -1.596366  
C -1.706179 0.239049 -0.135311  
S -2.670222 -0.671130 -1.438768  
C -1.803462 -2.272757 -1.485585  
H -0.798429 -2.121715 -1.883339  
H -1.755091 -2.712412 -0.485001  
H -2.381696 -2.928518 -2.144723  
S -2.084572 -0.493088 1.559754  
C -3.826177 0.008578 1.763169  
H -4.187355 -0.470199 2.678746  
H -3.925598 1.092967 1.866123  
H -4.420555 -0.339447 0.912918  
C -2.104343 1.715662 -0.269261  
H -1.954582 2.238943 0.677389  
H -1.416639 2.164808 -0.996809  
H -3.146377 1.830110 -0.593174  
O 0.604863 2.029526 0.571360  
O 0.836118 2.540098 -0.747826

PBN-alpha-3CH2OH-O2.com.log

33

C 3.912386 -1.493561 -0.734896  
C 2.633924 -0.996751 -1.000550  
C 2.132773 0.104178 -0.298676  
C 2.933726 0.704081 0.680938  
C 4.211263 0.213201 0.945302  
C 4.706234 -0.888899 0.240422  
H 4.287735 -2.349834 -1.291932  
H 2.015413 -1.469053 -1.761377  
H 2.537651 1.560222 1.214513  
H 4.824763 0.689098 1.707828  
H 5.703290 -1.271292 0.449980  
C 0.750227 0.645352 -0.604857  
H 0.468462 0.423096 -1.643299  
N -0.258105 -0.121311 0.250710  
O -0.004816 -0.149009 1.524120  
C -1.708852 -0.239582 -0.088248  
C -2.463364 0.909122 0.623430  
H -3.460847 1.012750 0.188460  
H -1.891226 1.830263 0.432005  
C -1.975313 -0.169696 -1.603753  
H -1.703453 0.828007 -1.962632  
H -1.342964 -0.919799 -2.113614  
C -2.155418 -1.624350 0.460893  
O -3.570364 -1.682079 0.674230  
H -3.708694 -1.001233 1.365090  
H -1.615540 -1.832628 1.389082  
H -1.914610 -2.412711 -0.261483  
O -3.353094 -0.411405 -1.897088  
H -3.716492 -0.955937 -1.173319  
O -2.652767 0.618210 2.021084  
H -1.743633 0.416545 2.326997  
O 0.717679 1.989371 -0.370398  
O -0.486467 2.550302 -0.994610

PBN-alpha-3COOH-O2.com.log

30

C -4.164179 -1.528635 0.114452  
C -2.813435 -1.222101 0.269122  
C -2.372195 0.104709 0.184642  
C -3.305482 1.116380 -0.060781  
C -4.658769 0.807247 -0.219920  
C -5.094196 -0.514688 -0.130954  
H -4.491160 -2.564233 0.179133  
H -2.090056 -2.012008 0.443063  
H -2.960804 2.142067 -0.129434  
H -5.372485 1.605047 -0.414748

H -6.148025 -0.755714 -0.254471  
C -0.922138 0.448397 0.453102  
H -0.702347 0.383474 1.521692  
N 0.002977 -0.507574 -0.207716  
O -0.306473 -0.923085 -1.389240  
C 1.443747 -0.243645 0.022498  
C 2.209965 -1.290810 -0.809404  
O 2.077061 -2.487105 -0.648317  
O 3.103006 -0.787788 -1.679398  
H 3.509214 -1.579795 -2.079851  
O -0.655449 1.760191 0.011099  
O 0.681863 2.062069 0.501231  
C 1.687884 1.332591 -0.450368  
O 1.549534 1.554048 -1.662865  
O 2.899981 1.750697 0.189595  
H 3.276058 2.316656 -0.505149  
C 1.820250 -0.488220 1.474210  
O 1.086463 -0.487903 2.444207  
O 3.150252 -0.726737 1.613637  
H 3.280145 -0.824907 2.574592

PBN-CH2CONH2-3-O2b.com.log

42

C 4.050529 1.645466 0.346447  
C 2.715315 1.228087 0.323328  
C 2.397793 -0.132023 0.220402  
C 3.440872 -1.071224 0.165925  
C 4.769095 -0.649761 0.192866  
C 5.082165 0.710716 0.275147  
H 4.279293 2.705734 0.435534  
H 1.923823 1.959911 0.435178  
H 3.155119 -2.120168 0.104727  
H 5.567343 -1.388276 0.150413  
H 6.120204 1.036916 0.292985  
C 0.978961 -0.690526 0.110155  
N -0.063388 0.278300 0.486353  
O 0.112087 0.931561 1.586594  
C -1.440149 0.237749 -0.146042  
C -1.347180 0.960273 -1.524882  
H -2.294201 0.807892 -2.046493  
H -0.583108 0.465245 -2.132235  
C -1.952818 -1.233800 -0.331367  
H -1.583272 -1.825329 0.507503  
H -3.043959 -1.188178 -0.266035  
C -2.439478 0.995738 0.772079  
H -1.981260 1.923514 1.118426  
H -3.305303 1.254773 0.160751  
C -2.989477 0.202624 1.963745  
O -4.147431 -0.207883 1.986155  
N -2.124236 0.022200 3.001819  
H -2.400164 -0.642906 3.710952  
H -1.136767 0.211963 2.849582  
C -1.077624 2.457994 -1.454648  
O -1.956715 3.291060 -1.268264  
N 0.228052 2.830420 -1.679261  
H 0.450375 3.794274 -1.465355  
H 0.975774 2.161019 -1.553015  
C -1.669277 -1.936416 -1.668378  
O -2.295536 -1.608525 -2.686655  
N -0.765798 -2.936328 -1.625292  
H -0.572981 -3.348066 -2.532267  
H -0.010552 -3.048821 -0.849271  
H 0.793519 -0.972022 -0.932047  
O 0.784847 -1.836775 0.913766  
O 1.204167 -3.006814 0.125488

PBN-CH2COOMe-3-O2.com.log

48

C -5.039235 -0.177300 1.088346

C -3.656393 -0.275508 0.943391  
C -3.099122 -1.040696 -0.089741  
C -3.953893 -1.703113 -0.974649  
C -5.340262 -1.598450 -0.835339  
C -5.889567 -0.838628 0.197562  
H -5.455183 0.423086 1.895054  
H -2.999838 0.259029 1.623602  
H -3.510879 -2.298718 -1.764781  
H -5.991655 -2.117177 -1.536034  
H -6.969168 -0.760131 0.309316  
C -1.593617 -1.251777 -0.193594  
N -0.899600 0.092218 -0.017767  
O -1.475737 1.107309 -0.564499  
C 0.603950 0.203545 0.090365  
C 1.066529 -1.021160 0.907830  
H 0.423883 -1.141038 1.787972  
H 0.854289 -1.904486 0.238518  
C 1.149662 0.176169 -1.372100  
H 0.909384 -0.820283 -1.764977  
H 0.611010 0.956802 -1.916537  
C 0.914130 1.522753 0.847802  
H 1.995026 1.675096 0.807199  
H 0.610810 1.400161 1.892261  
C -1.399843 4.384805 0.725731  
H -0.738900 5.220522 0.473926  
H -1.976573 4.109561 -0.162437  
H -2.070863 4.662856 1.542091  
O -0.656745 3.261640 1.196769  
C 0.259984 2.778998 0.304153  
O 0.548819 3.367894 -0.713346  
C 2.478573 -1.063635 1.394444  
O 3.428954 -0.381206 1.059018  
O 2.613580 -2.055224 2.328185  
C 3.939780 -2.243782 2.820679  
H 3.873621 -3.059869 3.543511  
H 4.625824 -2.510857 2.010566  
H 4.314238 -1.336236 3.305519  
C 2.625804 0.459057 -1.538005  
O 3.176055 1.536546 -1.434436  
O 3.304996 -0.668428 -1.888335  
C 4.718702 -0.504095 -1.990414  
H 5.134217 -0.207458 -1.023184  
H 5.108768 -1.478950 -2.292519  
H 4.975456 0.255661 -2.735933  
H -1.263460 -1.887337 0.636174  
O -1.259143 -1.865242 -1.378010  
O -0.040016 -2.669394 -1.193308

PBN-CH2NHCOMe-3-O2.com.log

51

C -4.687350 -1.002183 -2.037204  
C -3.425674 -1.113587 -1.456363  
C -3.204408 -0.684378 -0.140910  
C -4.272095 -0.146395 0.581592  
C -5.536092 -0.026583 -0.002383  
C -5.749985 -0.454554 -1.312317  
H -4.841500 -1.338678 -3.060300  
H -2.599765 -1.525021 -2.029443  
H -4.094740 0.164437 1.604986  
H -6.356281 0.397724 0.573184  
H -6.734715 -0.365870 -1.766435  
C -1.857793 -0.899074 0.537807  
H -1.683603 -1.972033 0.670502  
N -0.755512 -0.373890 -0.354185  
O -1.043345 0.647135 -1.098370  
C 0.686617 -0.526030 0.020786  
C 1.057541 0.406101 1.233589  
H 2.098269 0.727866 1.154872  
H 0.870854 -0.178522 2.142390  
C 0.908054 -2.000126 0.462010

H 0.253952 -2.169963 1.328469  
H 0.670035 -2.684774 -0.355683  
C 1.536783 -0.240351 -1.237600  
H 1.127243 -0.827059 -2.070213  
H 2.556976 -0.583520 -1.060166  
N 1.637137 1.157710 -1.604473  
H 0.754988 1.651214 -1.638751  
C 2.824532 1.819107 -1.695193  
O 3.919046 1.268832 -1.579194  
C 2.699124 3.317339 -1.932926  
H 1.815163 3.574761 -2.528227  
H 2.614248 3.805992 -0.956193  
H 3.598712 3.673377 -2.440628  
N 0.227734 1.589762 1.355135  
H -0.739975 1.369312 1.582133  
N 2.285421 -2.270556 0.852954  
H 2.594980 -1.895791 1.737911  
C 3.148363 -3.039754 0.131723  
O 2.854498 -3.578435 -0.931903  
C 0.674439 2.862734 1.369165  
O 1.853279 3.196806 1.211013  
C -0.407645 3.916614 1.593812  
H -1.402474 3.494358 1.764648  
H -0.125805 4.535905 2.451797  
H -0.448141 4.572180 0.717114  
C 4.545906 -3.174029 0.728869  
H 4.857997 -4.220114 0.663371  
H 5.242723 -2.579764 0.127579  
H 4.614939 -2.840481 1.769784  
O -1.821592 -0.315514 1.795030  
O -1.018066 -1.168303 2.703989

PBN-CH2OCOMe-3-O2b.com.log

48

C -5.300304 -1.595032 -0.252552  
C -3.923272 -1.824591 -0.298588  
C -3.035332 -0.759392 -0.464006  
C -3.545843 0.538076 -0.594342  
C -4.920217 0.767838 -0.553834  
C -5.804588 -0.300268 -0.380764  
H -5.980959 -2.433379 -0.119691  
H -3.517285 -2.826330 -0.215292  
H -2.860450 1.373217 -0.719028  
H -5.301114 1.781589 -0.656533  
H -6.877496 -0.122964 -0.349104  
C -1.539635 -1.010425 -0.583290  
H -1.177963 -0.654878 -1.555033  
N -0.833542 -0.175280 0.475746  
O -1.395650 -0.130476 1.641997  
C 0.670110 -0.109250 0.497738  
C 1.134352 -1.444882 1.133193  
H 0.577844 -1.569765 2.066579  
H 0.878295 -2.243316 0.428201  
C 1.151587 0.088460 -0.955001  
H 0.993853 -0.852379 -1.496070  
H 0.571376 0.891962 -1.408519  
C 1.094891 1.070801 1.382251  
H 2.167998 1.008616 1.559890  
H 0.556716 1.028664 2.328040  
C -0.162759 3.156879 0.927842  
O -0.380448 4.030785 0.114073  
O 0.883178 2.325713 0.699703  
C -0.965958 2.982832 2.198306  
H -1.471939 2.010807 2.203747  
H -0.315909 3.025720 3.080066  
H -1.697244 3.790652 2.246583  
O 2.525361 -1.441843 1.511522  
O 2.558194 0.410886 -0.963564  
C 3.475134 -2.205437 0.903284  
O 4.552799 -2.301685 1.449493



C 3.079652 1.464037 -1.644541  
O 4.277002 1.638372 -1.603318  
C 3.178861 -2.840468 -0.440596  
H 2.168283 -3.243639 -0.555932  
H 3.297761 -2.063255 -1.204405  
H 3.929850 -3.614248 -0.611406  
C 2.146397 2.371380 -2.426043  
H 1.556900 1.813822 -3.162193  
H 1.453795 2.891866 -1.755772  
H 2.766895 3.103341 -2.944754  
O -1.240109 -2.350770 -0.465439  
O -0.065685 -2.677545 -1.282460

PBN-CH2OCONHMe-3-O2.com.log

54

C 3.328420 2.361640 2.526589  
C 2.361054 1.857884 1.659122  
C 2.731989 1.157143 0.503652  
C 4.090454 0.975601 0.231989  
C 5.061604 1.473194 1.105203  
C 4.686180 2.168635 2.254509  
H 3.023489 2.901610 3.420854  
H 1.306459 1.994652 1.880587  
H 4.365339 0.448879 -0.674993  
H 6.115306 1.320263 0.880929  
H 5.441875 2.559769 2.932583  
C 1.689597 0.696229 -0.506391  
H 1.241349 1.571300 -0.991228  
N 0.578253 -0.019337 0.212877  
O 0.871628 -0.700064 1.280876  
C -0.669608 -0.420143 -0.505837  
C -1.166634 0.724806 -1.390571  
H -2.128932 0.468703 -1.835784  
H -0.415476 0.910158 -2.168015  
C -0.421518 -1.640981 -1.435318  
H 0.317268 -1.348877 -2.198231  
H -1.369725 -1.922556 -1.906553  
C -1.672369 -0.775236 0.608190  
H -1.767435 0.059348 1.309430  
H -1.297774 -1.660886 1.124353  
C -4.012089 -1.426300 0.745503  
O -5.102219 -1.584643 0.229250  
O -2.948108 -1.044470 -0.003616  
N -3.788168 -1.580346 2.095296  
H -2.836911 -1.675062 2.418293  
C -4.834088 -2.148813 2.925707  
H -4.921732 -3.239153 2.813794  
H -4.624873 -1.915730 3.974386  
H -5.788201 -1.702844 2.640164  
O -1.329222 1.900666 -0.556510  
C -2.053570 2.916023 -1.080293  
O -2.637113 2.898547 -2.148843  
N -2.058834 3.970887 -0.198029  
H -1.379851 3.919062 0.548045  
C -2.564205 5.267447 -0.596515  
H -3.037717 5.768334 0.255445  
H -1.780073 5.925542 -1.000075  
H -3.310546 5.106610 -1.376073  
O 0.021715 -2.745903 -0.630834  
C 1.263862 -3.263242 -0.941391  
O 1.521607 -3.818096 -1.991348  
N 2.099200 -3.139726 0.131048  
H 1.840362 -2.375603 0.755338  
C 3.513283 -3.411007 -0.050459  
H 4.018122 -2.596160 -0.587022  
H 3.987273 -3.545094 0.927679  
H 3.625467 -4.327634 -0.633751  
O 2.249169 -0.096286 -1.489448  
O 1.548741 0.147465 -2.754608

PBN-CH2OMe-3-O2.com.log

42

|   |           |           |           |
|---|-----------|-----------|-----------|
| C | 4.205003  | -1.848716 | -0.098569 |
| C | 2.884500  | -1.505915 | 0.199142  |
| C | 2.459676  | -0.173872 | 0.138687  |
| C | 3.377351  | 0.822626  | -0.215465 |
| C | 4.698990  | 0.478557  | -0.503872 |
| C | 5.119144  | -0.854150 | -0.451982 |
| H | 4.520144  | -2.889902 | -0.050405 |
| H | 2.171713  | -2.280425 | 0.477369  |
| H | 2.988349  | 1.838955  | -0.262139 |
| H | 5.409045  | 1.257748  | -0.777264 |
| H | 6.150319  | -1.115942 | -0.684535 |
| C | 1.040071  | 0.180995  | 0.562425  |
| H | 0.797968  | -0.410521 | 1.456096  |
| N | 0.071550  | -0.281254 | -0.484973 |
| O | 0.456790  | -0.284904 | -1.716740 |
| C | -1.395489 | -0.061589 | -0.278175 |
| C | -2.081520 | -1.131977 | -1.147831 |
| H | -1.785814 | -0.982929 | -2.193844 |
| H | -1.751609 | -2.131614 | -0.830372 |
| C | -1.788126 | -0.249200 | 1.190494  |
| H | -1.294805 | 0.506302  | 1.809461  |
| H | -2.872965 | -0.111850 | 1.275810  |
| C | -1.765823 | 1.379107  | -0.765856 |
| H | -2.426755 | 1.303491  | -1.642032 |
| H | -0.819212 | 1.868856  | -1.033121 |
| C | -1.902580 | 3.440028  | 0.417260  |
| H | -2.291209 | 4.131046  | -0.354306 |
| H | -2.250259 | 3.797242  | 1.395172  |
| H | -0.802762 | 3.420540  | 0.371499  |
| O | -2.436404 | 2.130602  | 0.245482  |
| O | -3.493890 | -1.014787 | -1.006233 |
| C | -4.184380 | -1.932684 | -1.810383 |
| H | -5.255908 | -1.772220 | -1.648874 |
| H | -3.962842 | -1.792413 | -2.883008 |
| H | -3.939882 | -2.978289 | -1.551672 |
| O | -1.428921 | -1.566155 | 1.619707  |
| C | -1.807778 | -1.802557 | 2.950493  |
| H | -1.498481 | -2.822016 | 3.205868  |
| H | -1.323429 | -1.099993 | 3.650021  |
| H | -2.900049 | -1.717656 | 3.090183  |
| O | 0.827947  | 1.494908  | 0.957799  |
| O | 1.009898  | 2.428644  | -0.167929 |

PBN-CH2POOMe2-3-O2.com.log

63

|   |           |           |           |
|---|-----------|-----------|-----------|
| C | 3.789976  | -3.327647 | -1.032919 |
| C | 2.740993  | -2.416982 | -1.168152 |
| C | 3.001226  | -1.045697 | -1.283424 |
| C | 4.325294  | -0.599849 | -1.264866 |
| C | 5.374351  | -1.510587 | -1.126339 |
| C | 5.112195  | -2.877343 | -1.011106 |
| H | 3.573908  | -4.390763 | -0.947940 |
| H | 1.710827  | -2.766755 | -1.165723 |
| H | 4.515280  | 0.461946  | -1.371403 |
| H | 6.401180  | -1.150734 | -1.111232 |
| H | 5.931106  | -3.586505 | -0.908412 |
| C | 1.849494  | -0.074367 | -1.494939 |
| N | 1.004172  | -0.066419 | -0.233539 |
| O | 1.636632  | -0.039386 | 0.888560  |
| C | -0.408611 | 0.449033  | -0.187091 |
| C | -0.421358 | 2.004765  | -0.180513 |
| H | -1.455157 | 2.349706  | -0.249021 |
| H | 0.107344  | 2.280228  | -1.130378 |
| C | -1.099244 | -0.010212 | -1.507156 |
| H | -0.641478 | 0.562541  | -2.326465 |
| H | -0.878785 | -1.071933 | -1.669743 |
| C | -1.067710 | -0.129650 | 1.088648  |

H -2.122786 0.154415 1.106379  
H -0.583290 0.304252 1.963617  
P -1.021057 -1.942771 1.314295  
O -2.429741 -2.144508 2.113055  
O 0.005674 -2.298293 2.522698  
C 1.325777 -2.806667 2.247234  
H 1.949905 -2.018926 1.821441  
H 1.725963 -3.134748 3.210409  
H 1.271278 -3.654823 1.559070  
C -2.743175 -3.443395 2.618991  
H -2.691737 -4.196188 1.824195  
H -2.057119 -3.720337 3.426654  
H -3.764137 -3.391704 3.005940  
O -0.843153 -2.814497 0.111188  
P -2.894200 0.072345 -1.771909  
O -3.305738 -0.160805 -3.184097  
O -3.624187 -0.948133 -0.724074  
O -3.347746 1.488375 -1.124153  
C -4.705658 1.916825 -1.284658  
H -4.755023 2.937487 -0.899981  
H -4.991415 1.901513 -2.340948  
H -5.379336 1.271310 -0.710590  
C -3.894178 -2.299956 -1.134403  
H -2.983890 -2.900987 -1.055291  
H -4.648456 -2.685137 -0.443037  
H -4.280357 -2.318304 -2.157525  
P 0.343045 3.073940 1.066048  
O -0.257980 4.441377 1.067201  
O 0.232425 2.296067 2.496259  
O 1.948041 3.067410 0.861470  
C 0.900791 2.855988 3.628379  
H 0.634744 3.911577 3.756131  
H 0.569700 2.288301 4.502292  
H 1.985289 2.760814 3.516196  
C 2.497756 3.813195 -0.250228  
H 2.116177 3.422584 -1.202003  
H 2.263111 4.877029 -0.132446  
H 3.579019 3.664001 -0.199796  
H 1.204260 -0.446807 -2.296496  
O 2.319219 1.170949 -1.829475  
O 1.264095 1.905749 -2.549929

PBN-CH2SMe-3-O2.com.log

42

C -4.854702 1.200109 0.084265  
C -3.493861 0.985551 -0.126981  
C -2.990259 -0.314586 -0.268584  
C -3.874832 -1.393174 -0.194940  
C -5.238263 -1.179426 0.024902  
C -5.734901 0.116764 0.162980  
H -5.229511 2.215959 0.193159  
H -2.810673 1.828862 -0.170894  
H -3.473962 -2.392718 -0.319851  
H -5.913964 -2.030726 0.082779  
H -6.797308 0.284578 0.329005  
C -1.523820 -0.553778 -0.606624  
H -1.316965 -0.151848 -1.604923  
N -0.662831 0.232131 0.366970  
O -1.095885 0.355932 1.575479  
C 0.846864 0.237610 0.222938  
C 1.297148 -1.122373 0.833286  
H 0.723345 -1.244253 1.756342  
H 1.027230 -1.909158 0.119516  
C 1.166386 0.365921 -1.277799  
H 0.680647 -0.484480 -1.785120  
H 0.764628 1.312391 -1.651456  
C 1.371179 1.413475 1.070037  
H 2.460691 1.447203 1.011857  
H 1.086686 1.248579 2.109076  
S 0.724428 3.086175 0.627681

|   |           |           |           |
|---|-----------|-----------|-----------|
| C | 2.138231  | 3.777012  | -0.308138 |
| H | 2.339487  | 3.213357  | -1.223363 |
| H | 1.867669  | 4.802722  | -0.578347 |
| H | 3.045708  | 3.803655  | 0.303748  |
| S | 3.081166  | -1.292534 | 1.323349  |
| S | 2.948098  | 0.313222  | -1.739214 |
| C | 2.853890  | -2.621911 | 2.560350  |
| H | 3.842488  | -2.878782 | 2.954022  |
| H | 2.216444  | -2.292673 | 3.388527  |
| H | 2.413245  | -3.514266 | 2.104022  |
| C | 3.125829  | -1.446919 | -2.255824 |
| H | 3.315069  | -1.503574 | -3.332132 |
| H | 3.953022  | -1.900553 | -1.704726 |
| H | 2.198522  | -1.976927 | -2.016297 |
| O | -1.220740 | -1.901167 | -0.604369 |
| O | -0.226511 | -2.204480 | -1.651360 |

PBN-COOMe-3-O2.com.log

39

|   |           |           |           |
|---|-----------|-----------|-----------|
| C | 3.991538  | -2.166049 | 0.033657  |
| C | 2.720168  | -1.587136 | 0.055313  |
| C | 2.581115  | -0.198614 | 0.139068  |
| C | 3.725265  | 0.607791  | 0.206825  |
| C | 4.992813  | 0.025077  | 0.191522  |
| C | 5.131748  | -1.363268 | 0.102980  |
| H | 4.090715  | -3.247513 | -0.042747 |
| H | 1.831946  | -2.207354 | -0.006246 |
| H | 3.575929  | 1.681825  | 0.290692  |
| H | 5.877693  | 0.656878  | 0.246773  |
| H | 6.121748  | -1.816025 | 0.086668  |
| C | 1.232323  | 0.498421  | 0.216097  |
| H | 0.946525  | 0.653872  | 1.260556  |
| N | 0.174058  | -0.300311 | -0.427718 |
| O | 0.340466  | -0.576064 | -1.694911 |
| C | -1.235771 | -0.010918 | -0.045702 |
| C | -3.286599 | -1.045939 | 2.854355  |
| H | -2.962454 | -2.076245 | 3.029025  |
| H | -2.860235 | -0.402118 | 3.628760  |
| H | -4.375956 | -0.980391 | 2.860556  |
| C | -1.544493 | -0.605577 | 1.344044  |
| O | -0.742335 | -1.034445 | 2.136709  |
| O | -2.880469 | -0.597932 | 1.557786  |
| C | -2.108987 | -0.732651 | -1.094184 |
| O | -2.862924 | -0.222585 | -1.884240 |
| C | -1.493090 | 1.510929  | 0.055258  |
| O | -1.634098 | 2.048589  | 1.137003  |
| O | -1.970087 | -2.071175 | -0.943001 |
| O | -1.459227 | 2.133561  | -1.118438 |
| C | -1.154522 | 3.544525  | -1.025795 |
| H | -0.225737 | 3.663652  | -0.453023 |
| H | -1.034484 | 3.871688  | -2.060253 |
| H | -1.983931 | 4.080060  | -0.551772 |
| C | -2.641378 | -2.857288 | -1.928803 |
| H | -2.240405 | -2.637394 | -2.922572 |
| H | -2.443746 | -3.896955 | -1.661413 |
| H | -3.717265 | -2.656862 | -1.924547 |
| O | 1.248709  | 1.758540  | -0.420046 |
| O | 1.550023  | 2.773917  | 0.552358  |

PBN-NHCOMe-3-O2.com.log

42

|   |           |           |           |
|---|-----------|-----------|-----------|
| C | -4.284043 | 1.472638  | -0.153722 |
| C | -2.970135 | 1.008768  | -0.090242 |
| C | -2.712091 | -0.360353 | 0.063996  |
| C | -3.787171 | -1.251549 | 0.148251  |
| C | -5.101267 | -0.784125 | 0.077633  |
| C | -5.355225 | 0.579662  | -0.071623 |
| H | -4.470139 | 2.537417  | -0.275395 |
| H | -2.139999 | 1.703834  | -0.168787 |

H -3.580481 -2.310011 0.261276  
H -5.927131 -1.489806 0.139305  
H -6.378772 0.944642 -0.126076  
C -1.287299 -0.868755 0.233594  
H -0.984394 -0.822558 1.283491  
N -0.340548 -0.016859 -0.516790  
O -0.577126 0.161115 -1.761606  
C 1.138474 0.063914 -0.054968  
N 1.710084 -1.219901 -0.192292  
H 0.625138 -2.372409 0.322109  
C 2.679687 -1.500817 -1.068274  
O 3.296848 -0.727738 -1.851979  
C 3.100187 -2.969517 -1.059398  
H 3.403264 -3.266740 -2.068171  
H 3.966774 -3.091086 -0.397041  
H 2.298848 -3.621422 -0.700425  
N 1.757321 1.107705 -0.850033  
H 2.453646 0.714610 -1.508175  
N 1.023913 0.492888 1.348868  
H 0.469142 1.346199 1.385168  
C 1.352297 2.393380 -0.851184  
O 0.508671 2.870608 -0.076507  
C 2.028001 0.428906 2.294403  
O 3.044765 -0.241415 2.234552  
C 2.010501 3.265937 -1.911887  
H 1.347451 3.317142 -2.783610  
H 2.133779 4.278557 -1.518602  
H 2.977293 2.871871 -2.239673  
C 1.714017 1.297402 3.519344  
H 1.607458 2.351270 3.233268  
H 0.774634 0.985258 3.990690  
H 2.530841 1.197302 4.236356  
O -1.231133 -2.226394 -0.169753  
O -0.206817 -2.895408 0.619106

PBN-OCOMe-3-O2.com.log

39

C -3.696012 -0.395024 2.182880  
C -2.444790 -0.485014 1.574215  
C -2.332060 -0.511928 0.177745  
C -3.492654 -0.441279 -0.598023  
C -4.744587 -0.348146 0.013465  
C -4.853230 -0.327232 1.403954  
H -3.764826 -0.372675 3.268085  
H -1.544027 -0.518403 2.178509  
H -3.414008 -0.451762 -1.678075  
H -5.637707 -0.289252 -0.604332  
H -5.829833 -0.255011 1.877451  
C -0.957064 -0.682867 -0.452067  
N 0.040495 0.117034 0.165109  
O -0.307213 1.457601 0.516618  
C 1.456037 0.197575 -0.427305  
C -0.722399 2.344581 -0.453253  
O -1.359850 2.070912 -1.435699  
O 1.634382 0.969708 -1.367831  
C -0.313095 3.734641 -0.023803  
H 0.752366 3.847746 -0.252280  
H -0.890889 4.478108 -0.576418  
H -0.439884 3.868711 1.054134  
O 2.239699 0.466631 0.846262  
C 3.545624 0.787329 0.830460  
O 4.098992 1.027467 1.890798  
C 4.296697 0.819348 -0.487191  
H 4.159852 -0.113801 -1.040506  
H 3.896437 1.608370 -1.126574  
H 5.353284 0.985960 -0.265423  
O 1.787046 -1.254726 -0.771147  
C 2.029410 -2.293457 0.058174  
O 2.474733 -3.323165 -0.414392  
C 1.744908 -2.183901 1.549181

H 1.563024 -3.195250 1.921884  
H 2.620668 -1.772479 2.060564  
H 0.909190 -1.520796 1.772409  
H -0.628430 -1.720681 -0.370857  
O -1.063297 -0.535922 -1.952544  
O -1.315665 -1.714228 -2.495182

PBN-OCONHMe-3-O2.com.log

45

C 4.505220 0.975093 -0.624236  
C 3.168319 0.607077 -0.466442  
C 2.822739 -0.425969 0.415402  
C 3.834032 -1.079018 1.131474  
C 5.169606 -0.707988 0.968600  
C 5.510991 0.321166 0.089936  
H 4.759882 1.774457 -1.316561  
H 2.388830 1.104964 -1.033269  
H 3.573450 -1.878210 1.817198  
H 5.943400 -1.226633 1.530604  
H 6.552285 0.609324 -0.038884  
C 1.357376 -0.764954 0.652880  
N 0.497972 -0.359191 -0.370465  
O 0.863353 -0.702542 -1.674983  
C -0.839163 0.110309 -0.146875  
C -0.423772 2.492759 -0.671511  
O 0.227731 2.334935 -1.683917  
O -0.892973 1.536216 0.172578  
N -0.810793 3.714016 -0.170725  
H -1.242010 3.701082 0.742547  
C -0.267456 4.947241 -0.692649  
H -1.048735 5.713063 -0.768878  
H 0.552344 5.344733 -0.075251  
H 0.122577 4.736224 -1.689903  
O -1.675362 -0.066744 -1.207732  
C -2.156705 -1.427293 -1.491319  
O -3.367367 -1.596800 -1.256305  
N -1.230258 -2.203405 -1.969791  
H 0.182403 -1.439071 -1.909688  
C -1.653362 -3.562658 -2.250824  
H -2.207085 -4.011709 -1.412379  
H -2.312799 -3.619621 -3.132559  
H -0.769480 -4.178948 -2.452605  
O -1.283998 -0.482313 1.059252  
C -2.377689 0.083990 1.745384  
O -2.219238 0.616113 2.828453  
N -3.551736 -0.112589 1.121932  
H -3.580035 -0.632780 0.229570  
C -4.776169 0.365172 1.725235  
H -4.736884 1.446886 1.904733  
H -5.602674 0.148412 1.043361  
H -4.971870 -0.123095 2.689117  
H 0.999989 -0.372516 1.604699  
O 1.249788 -2.278480 0.848197  
O 1.325106 -2.607627 2.124602

PBN-OMe-3-O2b.com.log

33

C -3.419012 1.484916 0.613040  
C -2.121264 0.973006 0.614785  
C -1.862879 -0.319102 0.138969  
C -2.927075 -1.088244 -0.341349  
C -4.225880 -0.574237 -0.349118  
C -4.478775 0.712624 0.130084  
H -3.603208 2.490859 0.985826  
H -1.292486 1.578771 0.973921  
H -2.713265 -2.087683 -0.702688  
H -5.043879 -1.182844 -0.730630  
H -5.491361 1.111869 0.126373  
C -0.453538 -0.897809 0.211241

N 0.508540 0.109871 -0.378337  
O 0.325294 0.465971 -1.598918  
C 1.741875 0.619922 0.285336  
C 2.901428 -0.810702 -1.332283  
H 2.623557 -0.491805 -2.342555  
H 3.941395 -1.158030 -1.328243  
H 2.218114 -1.609255 -0.985574  
O 2.883696 0.338556 -0.452273  
O 1.797590 0.188562 1.605995  
C 2.495077 -1.039715 1.871507  
H 3.546427 -0.953410 1.572000  
H 2.440899 -1.156267 2.958906  
H 1.997111 -1.876873 1.356393  
O 1.655484 2.018127 0.446315  
C 1.673720 2.819146 -0.727290  
H 0.705740 2.816693 -1.238512  
H 1.910589 3.833730 -0.385314  
H 2.444351 2.479249 -1.425731  
H -0.146551 -0.996695 1.259168  
O -0.404914 -2.099611 -0.437690  
O 0.862942 -2.767383 -0.080243

PBN-POOMe-3-O2b.com.log

54

C -4.507958 1.656632 0.477919  
C -3.266948 1.021018 0.450788  
C -3.158386 -0.306669 0.014593  
C -4.314707 -0.986976 -0.383207  
C -5.556059 -0.347261 -0.354790  
C -5.658845 0.976072 0.074119  
H -4.574302 2.688437 0.815802  
H -2.367863 1.541649 0.764571  
H -4.246241 -2.015588 -0.717732  
H -6.444598 -0.888756 -0.672239  
H -6.626454 1.472965 0.094281  
C -1.793873 -0.990276 0.068842  
N -0.753456 -0.093283 -0.194398  
O -0.738098 0.466396 -1.510286  
C 0.666311 -0.159185 0.100982  
P 0.980798 1.132107 -1.336576  
O 2.397433 1.582884 -0.478790  
O 0.401101 2.687198 -1.144269  
C -0.707543 3.118640 -1.928566  
H -0.709552 4.214138 -1.880056  
H -0.600275 2.806836 -2.973916  
H -1.649556 2.723483 -1.540094  
C 3.321935 2.444107 -1.113841  
H 2.919610 3.462157 -1.218682  
H 4.222118 2.483561 -0.487312  
H 3.585573 2.067598 -2.109026  
O 1.480825 0.796568 -2.717581  
P 0.954886 0.433693 1.843785  
O 2.336765 0.339478 2.391197  
O -0.166979 -0.380949 2.697383  
O 0.269726 1.898361 1.932864  
C 1.078065 3.086468 1.956024  
H 2.101033 2.850766 2.258743  
H 1.071201 3.534034 0.961765  
H 0.621137 3.760606 2.688211  
C 0.254574 -1.367793 3.658447  
H 0.970870 -0.936344 4.363845  
H -0.652842 -1.668211 4.189437  
H 0.700445 -2.220104 3.143067  
P 1.545536 -1.810234 -0.141480  
O 1.428985 -2.650987 1.083403  
O 0.916464 -2.529252 -1.418389  
O 3.053365 -1.523918 -0.650512  
C 1.273049 -2.308709 -2.799241  
H 2.251251 -2.760382 -2.994540  
H 0.503257 -2.822785 -3.379370

H 1.289344 -1.242259 -3.035095  
C 4.102757 -1.165369 0.264755  
H 5.029126 -1.207320 -0.314762  
H 3.933607 -0.162670 0.656584  
H 4.145341 -1.880535 1.091599  
H -1.612422 -1.456622 1.038272  
O -1.837663 -2.166854 -0.893679  
O -2.191693 -3.275094 -0.265018

PBN-SMe-3-O2-c.com.log

33

C 3.715227 -1.869544 -0.009871  
C 2.435491 -1.311587 0.021008  
C 2.266501 0.071778 0.143700  
C 3.399271 0.891528 0.234704  
C 4.677501 0.331127 0.206987  
C 4.842263 -1.050829 0.085118  
H 3.831316 -2.946778 -0.115497  
H 1.559387 -1.945964 -0.061964  
H 3.243364 1.960643 0.343396  
H 5.549953 0.978084 0.280634  
H 5.839903 -1.485874 0.061237  
C 0.884327 0.707459 0.245372  
N -0.117372 -0.092304 -0.445087  
O 0.115469 -0.242006 -1.743101  
C -1.494247 -0.142228 0.019338  
S -2.514766 -1.259891 -1.039006  
C -1.441722 -2.730845 -1.196897  
H -0.536491 -2.434953 -1.730863  
H -1.200952 -3.139784 -0.211038  
H -2.008351 -3.473146 -1.769241  
S -1.410203 -0.776227 1.782016  
C -3.152627 -0.673201 2.325620  
H -3.210007 -1.238631 3.261366  
H -3.462780 0.358230 2.508811  
H -3.805094 -1.134960 1.579561  
S -2.475835 1.489808 0.016939  
C -1.999826 2.153172 -1.620127  
H -2.484000 3.132727 -1.693636  
H -0.915545 2.269444 -1.652241  
H -2.347178 1.501862 -2.424352  
H 0.598725 0.832431 1.292655  
O 0.875503 2.021690 -0.332259  
O 1.232685 2.956913 0.645095

PBN-TriCONH2-O2.log

33

C -4.549057 0.846588 0.340761  
C -3.197454 1.135504 0.136133  
C -2.316310 0.124662 -0.251963  
C -2.797151 -1.177358 -0.437181  
C -4.145017 -1.464404 -0.229854  
C -5.026701 -0.451925 0.160123  
H -5.229199 1.639923 0.643673  
H -2.819221 2.143163 0.270552  
H -2.098639 -1.953672 -0.739538  
H -4.509367 -2.479185 -0.373821  
H -6.079427 -0.675100 0.320411  
C -0.855200 0.393570 -0.531420  
H -0.594431 0.043248 -1.531176  
N 0.012720 -0.344701 0.423769  
O -0.386942 -0.287009 1.655492  
C 1.456915 -0.304958 0.067262  
C 1.907836 1.281938 0.006481  
N 1.728919 1.827902 1.337892  
H 2.124564 2.765731 1.296180  
H 0.736751 1.911000 1.555198  
O 3.012235 1.544892 -0.565082  
C 2.419427 -1.032111 1.047000



O 3.599784 -1.167882 0.758046  
N 1.879436 -1.539000 2.193042  
H 2.561412 -1.807507 2.889686  
H 0.978779 -1.158359 2.477107  
C 1.593964 -1.013967 -1.311495  
O 0.778877 -1.864931 -1.684901  
N 2.677057 -0.633013 -2.006769  
H 2.756168 -0.978456 -2.953029  
H 3.136904 0.238258 -1.675572  
O -0.560112 1.763940 -0.422919  
O 0.806318 1.899415 -0.964422

PBN-alpha-carbamate-O2H.log

36

C -4.095749 -1.061410 -0.743655  
C -2.751745 -0.731827 -0.912675  
C -2.221822 0.412051 -0.301092  
C -3.057327 1.226403 0.470874  
C -4.401337 0.888676 0.643781  
C -4.924274 -0.254109 0.039003  
H -4.495149 -1.950252 -1.224340  
H -2.109542 -1.358849 -1.524261  
H -2.658577 2.118181 0.941213  
H -5.038726 1.523556 1.253327  
H -5.970707 -0.513729 0.173701  
C -0.767610 0.779535 -0.574025  
H -0.661811 1.225097 -1.567166  
N 0.133056 -0.392009 -0.647196  
O 0.732254 -0.549309 -1.775905  
C 0.697644 -1.116073 0.537401  
C -0.256283 -1.094622 1.731248  
H 0.225305 -1.634136 2.551507  
H -0.456751 -0.075317 2.063663  
H -1.197952 -1.592288 1.488880  
C 1.015284 -2.552053 0.116833  
H 0.073137 -3.076623 -0.076638  
H 1.636020 -2.579969 -0.774638  
H 1.544336 -3.053783 0.929937  
C 3.043747 -0.383086 0.304889  
O 3.629976 -1.387411 -0.046425  
O 1.837105 -0.359654 0.987855  
N 3.504180 0.890979 0.202029  
H 2.815684 1.619851 0.341375  
C 4.746549 1.190214 -0.482849  
H 5.239684 2.044062 -0.007058  
H 5.395083 0.315703 -0.411301  
H 4.589550 1.417395 -1.546143  
O -0.371286 1.731386 0.403415  
O 0.797203 2.429739 -0.111326  
H 0.445273 3.338118 -0.135208

PBN-alpha-carboxyl-O2H.log

34

C 3.221240 -0.833653 -1.596205  
C 1.979868 -0.532607 -1.040562  
C 1.909905 0.110443 0.203193  
C 3.085374 0.435591 0.883752  
C 4.329331 0.131474 0.325326  
C 4.397269 -0.502767 -0.915021  
H 3.273949 -1.325846 -2.563659  
H 1.059556 -0.782535 -1.561299  
H 3.027839 0.934000 1.848637  
H 5.240207 0.391797 0.857631  
H 5.363687 -0.738448 -1.352974  
C 0.563003 0.376604 0.837947  
H 0.677117 0.925459 1.781309  
N -0.316139 1.156769 -0.061969  
O 0.197616 2.266759 -0.442455  
C -1.805102 1.017036 -0.045857

C -2.358137 1.324809 1.356216  
H -3.450660 1.302128 1.345720  
H -2.010105 0.598050 2.093480  
H -2.032263 2.327077 1.654120  
C -2.377484 1.997673 -1.086480  
H -2.159174 3.026691 -0.796741  
H -1.941490 1.811908 -2.070552  
H -3.462276 1.860799 -1.141608  
C -3.656784 -2.189625 -0.440721  
H -3.879946 -2.153341 -1.510132  
H -2.869269 -2.926291 -0.264049  
H -4.550781 -2.435786 0.132562  
C -2.142903 -0.394794 -0.560480  
O -1.547393 -0.952327 -1.456702  
O -3.241222 -0.896254 0.032353  
O -0.133735 -0.846357 1.117827  
O 0.461656 -1.396140 2.315225  
H 1.157721 -1.959594 1.924708

PBN-alpha-CH2CONH2-HO2.log

35

C 3.865314 -1.067037 1.369971  
C 2.715777 -0.275225 1.367668  
C 2.040602 -0.011026 0.172732  
C 2.533478 -0.537144 -1.028432  
C 3.686854 -1.320075 -1.027394  
C 4.353086 -1.588773 0.171283  
H 4.382481 -1.267315 2.304229  
H 2.343441 0.141381 2.300984  
H 2.004114 -0.336421 -1.954135  
H 4.063165 -1.726870 -1.962094  
H 5.251174 -2.200529 0.169297  
C 0.811329 0.869026 0.186821  
N -0.440154 0.114014 0.049065  
O -0.398965 -0.977537 -0.625724  
C -1.793186 0.719321 0.328901  
C -1.649142 1.904683 1.297263  
H -2.642227 2.329802 1.469890  
H -1.248617 1.592912 2.268855  
H -1.018470 2.695915 0.882477  
C -2.395468 1.202997 -1.003414  
H -1.813660 2.037582 -1.403272  
H -2.395884 0.393999 -1.738076  
H -3.430067 1.523684 -0.846306  
C -2.678466 -0.373518 1.015451  
H -2.030281 -1.045429 1.588383  
H -3.344181 0.130124 1.719615  
C -3.619977 -1.186767 0.114246  
O -4.824529 -0.965340 0.098162  
N -3.030000 -2.181908 -0.607746  
H -3.606661 -2.641750 -1.299742  
H -2.028040 -2.130161 -0.760531  
H 0.772521 1.441977 1.114899  
O 0.795244 1.802618 -0.912744  
O 1.829539 2.785124 -0.643338  
H 2.600754 2.358659 -1.065116

PBN-alpha-CH2OH-OOH.com.log

32

C 3.726372 -0.806154 1.080136  
C 2.396595 -0.418807 1.253038  
C 1.642948 0.034909 0.166565  
C 2.237560 0.111040 -1.099873  
C 3.568568 -0.267199 -1.270735  
C 4.314347 -0.728987 -0.182969  
H 4.302580 -1.158607 1.931257  
H 1.942166 -0.468185 2.240154  
H 1.648656 0.454803 -1.943272  
H 4.023110 -0.208564 -2.256074

H 5.351106 -1.024607 -0.320029  
C 0.209810 0.468159 0.379362  
N -0.764373 -0.490446 -0.141872  
O -0.470140 -1.118407 -1.222679  
C -2.209306 -0.494912 0.273909  
C -2.651515 -1.961946 0.384668  
H -3.730704 -2.004719 0.550278  
H -2.410382 -2.500132 -0.534838  
H -2.143089 -2.455680 1.220078  
C -2.419811 0.233994 1.605509  
H -1.883101 -0.257754 2.424442  
H -2.113263 1.283209 1.551468  
H -3.487302 0.212104 1.837370  
C -2.986202 0.222098 -0.854034  
O -4.372013 0.189430 -0.525326  
H -4.852748 0.648242 -1.229803  
H -2.781421 -0.299562 -1.798396  
H -2.616455 1.253683 -0.938407  
H 0.019157 0.621437 1.442749  
O -0.093015 1.702607 -0.308884  
O 0.637288 2.758570 0.370559  
H 1.489140 2.726690 -0.106694

PBN-alpha-CONH2-HO2.log

32

C -3.958991 -0.664203 -0.948448  
C -2.605439 -0.427988 -1.194229  
C -1.801572 0.163751 -0.216060  
C -2.363665 0.524130 1.013486  
C -3.716457 0.294740 1.255756  
C -4.516464 -0.301773 0.277649  
H -4.575713 -1.122690 -1.716627  
H -2.173998 -0.704461 -2.153773  
H -1.742302 0.988407 1.771275  
H -4.147791 0.580290 2.211348  
H -5.571145 -0.479306 0.470395  
C -0.341170 0.410903 -0.516417  
N 0.501278 -0.705033 0.005847  
O 0.178980 -1.182408 1.155032  
C 1.957196 -0.809785 -0.372523  
C 2.416124 -2.252078 -0.094465  
H 3.498063 -2.326738 -0.239858  
H 2.173702 -2.574547 0.917896  
H 1.922966 -2.933510 -0.795303  
C 2.174721 -0.482147 -1.852652  
H 1.558162 -1.141481 -2.472776  
H 1.950683 0.556717 -2.091466  
H 3.224141 -0.658005 -2.104498  
C 2.707611 0.215162 0.528429  
N 2.734748 -0.090471 1.849660  
H 3.044733 0.648820 2.468553  
H 2.026536 -0.726960 2.201063  
O 3.235730 1.229177 0.066039  
H -0.177736 0.483244 -1.589878  
O 0.074965 1.644563 0.077561  
O 0.866240 2.400689 -0.874382  
H 1.778833 2.218318 -0.542052

PBN-alpha-COOH-OOH.com.log

31

C 3.236563 -1.781954 -0.390852  
C 1.965603 -1.268356 -0.651304  
C 1.588675 -0.026120 -0.130824  
C 2.492586 0.698623 0.655881  
C 3.764968 0.185537 0.909725  
C 4.139371 -1.054200 0.386834  
H 3.522381 -2.747882 -0.798579  
H 1.256375 -1.835266 -1.247775  
H 2.187328 1.652440 1.073580

|   |           |           |           |
|---|-----------|-----------|-----------|
| H | 4.462205  | 0.751392  | 1.521968  |
| H | 5.131051  | -1.451976 | 0.585857  |
| C | 0.211825  | 0.528596  | -0.430906 |
| H | -0.199930 | 0.062460  | -1.326367 |
| N | -0.728066 | 0.323300  | 0.671071  |
| O | -0.344691 | 0.657794  | 1.847693  |
| C | -2.184231 | 0.112750  | 0.420180  |
| C | -2.883573 | -0.105081 | 1.774172  |
| H | -3.942778 | -0.307897 | 1.600591  |
| H | -2.439362 | -0.943767 | 2.316613  |
| H | -2.779012 | 0.789136  | 2.390136  |
| C | -2.792388 | 1.329403  | -0.313716 |
| H | -2.629484 | 2.225469  | 0.291381  |
| H | -2.327994 | 1.493943  | -1.289344 |
| H | -3.865866 | 1.180610  | -0.456101 |
| C | -2.352548 | -1.163451 | -0.420760 |
| O | -1.474400 | -1.921112 | -0.770098 |
| O | -3.652320 | -1.372863 | -0.734384 |
| H | -3.676772 | -2.202642 | -1.248051 |
| O | 0.235028  | 1.958674  | -0.627557 |
| O | 0.915308  | 2.191723  | -1.887136 |
| H | 1.845810  | 2.222680  | -1.590133 |

PBN-alpha-ester-O2H.log

34

|   |           |           |           |
|---|-----------|-----------|-----------|
| C | -3.470569 | 0.044746  | -0.949329 |
| C | -2.154866 | -0.326820 | -1.231270 |
| C | -1.296591 | -0.716164 | -0.197691 |
| C | -1.763137 | -0.741810 | 1.121686  |
| C | -3.076775 | -0.370507 | 1.400918  |
| C | -3.931314 | 0.024045  | 0.368049  |
| H | -4.133313 | 0.345561  | -1.756209 |
| H | -1.795729 | -0.324283 | -2.258105 |
| H | -1.091402 | -1.043462 | 1.918710  |
| H | -3.434147 | -0.386183 | 2.426693  |
| H | -4.954537 | 0.314842  | 0.590297  |
| C | 0.113641  | -1.158828 | -0.522677 |
| H | 0.404392  | -0.830969 | -1.526028 |
| N | 1.133784  | -0.614811 | 0.426344  |
| O | 1.507942  | -1.357989 | 1.402183  |
| C | 2.039545  | 0.493968  | 0.016676  |
| C | 2.760566  | 1.054743  | 1.242358  |
| H | 3.281312  | 1.970332  | 0.945040  |
| H | 2.063184  | 1.279286  | 2.046322  |
| H | 3.496328  | 0.330627  | 1.596891  |
| C | 3.041878  | -0.003195 | -1.031750 |
| H | 3.612005  | -0.838654 | -0.617530 |
| H | 2.540258  | -0.339881 | -1.941867 |
| H | 3.730769  | 0.805632  | -1.292970 |
| C | 0.322381  | 2.253219  | -0.030268 |
| O | 0.077206  | 2.185239  | 1.148703  |
| O | 1.245566  | 1.480448  | -0.685417 |
| C | -0.357063 | 3.175746  | -1.013971 |
| H | 0.369211  | 3.632469  | -1.691700 |
| H | -1.062789 | 2.594335  | -1.617877 |
| H | -0.906255 | 3.942458  | -0.466153 |
| O | 0.091377  | -2.563898 | -0.441159 |
| O | 1.424881  | -3.058785 | -0.741659 |
| H | 1.802274  | -3.003397 | 0.162499  |

PBN-alpha-ether-O2H.log

32

|   |           |           |           |
|---|-----------|-----------|-----------|
| C | -3.406791 | -0.659419 | -0.989929 |
| C | -2.108935 | -0.214974 | -1.248093 |
| C | -1.346489 | 0.359540  | -0.227169 |
| C | -1.892268 | 0.495090  | 1.056312  |
| C | -3.188484 | 0.051034  | 1.311722  |
| C | -3.947325 | -0.527160 | 0.289952  |
| H | -3.994182 | -1.105934 | -1.787651 |

H -1.686176 -0.314841 -2.244710  
H -1.293521 0.945355 1.841968  
H -3.609044 0.158229 2.307928  
H -4.957916 -0.872200 0.491718  
C 0.052964 0.860462 -0.511106  
H 0.377493 0.574209 -1.515402  
N 1.064781 0.311501 0.445350  
O 1.370148 1.021459 1.470187  
C 2.037332 -0.743610 -0.011342  
C 3.087096 -0.107726 -0.929700  
H 3.821488 -0.864867 -1.220505  
H 2.626026 0.292745 -1.835591  
H 3.597288 0.705956 -0.407516  
C 2.689180 -1.364081 1.226653  
H 3.307789 -0.625129 1.737123  
H 1.944662 -1.724614 1.940564  
H 3.319194 -2.200862 0.909277  
C 0.490631 -2.606133 -0.146836  
H 1.079101 -3.377149 0.365295  
H -0.179755 -2.120837 0.571619  
H -0.110206 -3.078214 -0.927175  
O 1.328969 -1.665482 -0.815905  
O -0.021136 2.261231 -0.375255  
O 1.303141 2.814180 -0.601222  
H 1.653859 2.718400 0.310402

PBN-alpha-methylcarbamate-O2H.log  
39

C -3.675214 -1.961297 -0.811265  
C -2.461011 -1.497068 -0.307429  
C -2.385217 -0.222104 0.268992  
C -3.535611 0.570572 0.338762  
C -4.748857 0.105661 -0.170892  
C -4.819837 -1.162668 -0.747683  
H -3.728367 -2.951948 -1.255109  
H -1.569220 -2.109015 -0.360664  
H -3.485629 1.555733 0.797540  
H -5.635591 0.731113 -0.111719  
H -5.763524 -1.529655 -1.142789  
C -1.083745 0.311379 0.831138  
H -1.254343 1.253599 1.351102  
N -0.081691 0.563416 -0.237317  
O 0.265323 -0.449749 -0.945352  
C 0.689148 1.831759 -0.440802  
C 0.748455 2.095555 -1.954389  
H 1.356276 2.984388 -2.155560  
H 1.183468 1.242224 -2.474478  
H -0.258947 2.266987 -2.347689  
C 0.027360 3.019525 0.274803  
H -1.015315 3.134983 -0.038139  
H 0.062865 2.925059 1.364574  
H 0.556520 3.938772 0.002618  
C 2.111890 1.674053 0.148183  
H 2.059056 1.418911 1.206848  
H 2.649628 2.619927 0.028285  
C 3.060148 -0.518661 0.035015  
O 2.749945 -0.798057 1.188254  
O 2.890390 0.696409 -0.550322  
N 3.693076 -1.358778 -0.816708  
H 3.756064 -1.052436 -1.777236  
C 3.873893 -2.766772 -0.508484  
H 4.804434 -3.124761 -0.958446  
H 3.935564 -2.874106 0.574912  
H 3.038770 -3.377727 -0.874188  
O -0.614586 -0.651990 1.751662  
O 0.455535 -0.036362 2.520472  
H 1.247338 -0.446133 2.094906

PBN-alpha-methylcarboxyl-O2H.log  
37

|   |           |           |           |
|---|-----------|-----------|-----------|
| C | 4.034583  | -1.121635 | 0.733370  |
| C | 3.232606  | 0.011625  | 0.602058  |
| C | 2.006052  | -0.066550 | -0.066442 |
| C | 1.586748  | -1.285458 | -0.610289 |
| C | 2.389185  | -2.417961 | -0.475347 |
| C | 3.612061  | -2.338626 | 0.194657  |
| H | 4.985115  | -1.055091 | 1.255626  |
| H | 3.561714  | 0.962527  | 1.014941  |
| H | 0.629842  | -1.346929 | -1.116532 |
| H | 2.056424  | -3.364743 | -0.891484 |
| H | 4.233371  | -3.224113 | 0.299751  |
| C | 1.179507  | 1.190631  | -0.244369 |
| H | 1.400366  | 1.922293  | 0.542545  |
| N | -0.293429 | 0.938711  | -0.212175 |
| O | -0.922661 | 0.942035  | -1.333468 |
| C | -1.093274 | 1.114464  | 1.040679  |
| C | -0.395496 | 0.424223  | 2.224601  |
| H | -1.009723 | 0.552292  | 3.123004  |
| H | -0.268942 | -0.642138 | 2.033871  |
| H | 0.582142  | 0.868278  | 2.435672  |
| C | -1.254670 | 2.627368  | 1.307098  |
| H | -0.295121 | 3.095394  | 1.547792  |
| H | -1.669640 | 3.128963  | 0.427646  |
| H | -1.929756 | 2.791075  | 2.154490  |
| C | -2.493940 | 0.518998  | 0.782336  |
| H | -3.055591 | 1.150073  | 0.092136  |
| H | -3.039386 | 0.521434  | 1.735222  |
| C | -3.832816 | -2.440316 | -0.965361 |
| H | -4.808396 | -2.440261 | -1.452155 |
| H | -3.042854 | -2.657497 | -1.688963 |
| H | -3.800063 | -3.186554 | -0.166981 |
| O | -3.670790 | -1.116654 | -0.429552 |
| C | -2.521530 | -0.900359 | 0.242291  |
| O | -1.676246 | -1.754969 | 0.407860  |
| O | 1.547729  | 1.708828  | -1.497416 |
| O | 0.826942  | 2.956078  | -1.698528 |
| H | -0.009380 | 2.573036  | -2.044211 |

PBN-alpha-methylester-O2H.log

37

|   |           |           |           |
|---|-----------|-----------|-----------|
| C | -2.365793 | -1.950729 | 1.318662  |
| C | -1.017387 | -1.721331 | 1.052018  |
| C | -0.611146 | -1.367948 | -0.241062 |
| C | -1.560351 | -1.251659 | -1.260239 |
| C | -2.911853 | -1.476858 | -0.990488 |
| C | -3.315279 | -1.828219 | 0.298690  |
| H | -2.677492 | -2.229087 | 2.321744  |
| H | -0.272673 | -1.811909 | 1.836470  |
| H | -1.245848 | -0.986448 | -2.266761 |
| H | -3.644835 | -1.380510 | -1.786452 |
| H | -4.366027 | -2.009382 | 0.509060  |
| C | 0.859128  | -1.163417 | -0.539704 |
| N | 1.521158  | -0.237411 | 0.432664  |
| O | 2.163693  | -0.778061 | 1.404264  |
| C | 1.841136  | 1.185424  | 0.083458  |
| C | 2.191721  | 1.926124  | 1.381255  |
| H | 2.394246  | 2.977234  | 1.149322  |
| H | 1.363726  | 1.878405  | 2.091570  |
| H | 3.075844  | 1.489935  | 1.847691  |
| C | 3.042901  | 1.200128  | -0.885170 |
| H | 2.815576  | 0.707335  | -1.835857 |
| H | 3.347080  | 2.230738  | -1.097473 |
| H | 3.887416  | 0.678132  | -0.427168 |
| C | 0.638913  | 1.846937  | -0.601971 |
| H | 0.331912  | 1.326461  | -1.512843 |
| H | 0.909675  | 2.867831  | -0.892987 |
| C | -1.644760 | 2.315621  | -0.200963 |
| O | -1.773338 | 2.671251  | -1.351093 |
| O | -0.463183 | 1.888735  | 0.316121  |

|   |           |           |           |
|---|-----------|-----------|-----------|
| C | -2.734863 | 2.261353  | 0.839969  |
| H | -3.631317 | 2.745720  | 0.451308  |
| H | -2.955669 | 1.215102  | 1.077749  |
| H | -2.410003 | 2.749773  | 1.763558  |
| H | 1.007494  | -0.746790 | -1.542353 |
| O | 1.437373  | -2.442077 | -0.453333 |
| O | 2.860271  | -2.316400 | -0.719791 |
| H | 3.150053  | -2.080834 | 0.188703  |

PBN-alpha-methylether-O2H.log

35

|   |           |           |           |
|---|-----------|-----------|-----------|
| C | 3.734853  | 0.571713  | -0.691304 |
| C | 2.394590  | 0.263548  | -0.917028 |
| C | 1.640471  | -0.359081 | 0.085643  |
| C | 2.240478  | -0.676725 | 1.307374  |
| C | 3.582489  | -0.366402 | 1.532839  |
| C | 4.330311  | 0.258906  | 0.533951  |
| H | 4.316848  | 1.054462  | -1.471738 |
| H | 1.923252  | 0.499783  | -1.866314 |
| H | 1.657606  | -1.170315 | 2.081418  |
| H | 4.042222  | -0.613720 | 2.485824  |
| H | 5.375197  | 0.501530  | 0.708373  |
| C | 0.196505  | -0.731514 | -0.173919 |
| N | -0.583534 | 0.402459  | -0.781622 |
| O | -0.856314 | 0.321018  | -2.036171 |
| C | -1.434078 | 1.314629  | 0.051897  |
| C | -0.696521 | 1.715743  | 1.337723  |
| H | -1.320225 | 2.419473  | 1.899505  |
| H | -0.499077 | 0.863889  | 1.990369  |
| H | 0.250498  | 2.209689  | 1.100871  |
| C | -1.738061 | 2.562511  | -0.790725 |
| H | -0.806716 | 3.049731  | -1.094568 |
| H | -2.296513 | 2.309751  | -1.693774 |
| H | -2.320776 | 3.271760  | -0.194219 |
| C | -2.757319 | 0.583539  | 0.361827  |
| H | -3.149879 | 0.170969  | -0.579691 |
| H | -3.494561 | 1.306431  | 0.750016  |
| C | -3.566018 | -1.413705 | 1.335235  |
| H | -3.636201 | -1.943229 | 0.374400  |
| H | -3.308466 | -2.130370 | 2.118865  |
| H | -4.541957 | -0.961738 | 1.570863  |
| O | -2.534754 | -0.443582 | 1.308612  |
| H | -0.330775 | -1.021264 | 0.738375  |
| O | 0.249528  | -1.807000 | -1.077248 |
| O | -1.110727 | -2.244763 | -1.350943 |
| H | -1.323802 | -1.578421 | -2.042288 |

PBN-alpha-methylphosphoryl-HO2.log

42

|   |           |           |           |
|---|-----------|-----------|-----------|
| C | 4.437578  | -1.757862 | -0.492479 |
| C | 3.837912  | -0.500670 | -0.464827 |
| C | 2.518536  | -0.356392 | -0.015504 |
| C | 1.802063  | -1.478580 | 0.410203  |
| C | 2.404942  | -2.737755 | 0.373907  |
| C | 3.719063  | -2.880374 | -0.072713 |
| H | 5.461069  | -1.862239 | -0.842257 |
| H | 4.396239  | 0.376406  | -0.783599 |
| H | 0.770409  | -1.381717 | 0.730169  |
| H | 1.838839  | -3.608559 | 0.692617  |
| H | 4.182599  | -3.863136 | -0.098862 |
| C | 1.942060  | 1.045241  | 0.043936  |
| N | 0.442557  | 1.100165  | 0.067278  |
| O | -0.115613 | 1.465585  | 1.167388  |
| C | -0.342677 | 1.287334  | -1.195361 |
| C | -0.118544 | 2.733216  | -1.696956 |
| H | -0.773093 | 2.938814  | -2.550613 |
| H | -0.342615 | 3.452023  | -0.902960 |
| H | 0.914093  | 2.892029  | -2.022548 |

|   |           |           |           |
|---|-----------|-----------|-----------|
| C | 0.104222  | 0.266976  | -2.254372 |
| H | 1.160680  | 0.387734  | -2.512455 |
| H | -0.056678 | -0.755038 | -1.905533 |
| H | -0.476695 | 0.424852  | -3.169747 |
| C | -1.845564 | 1.136064  | -0.864575 |
| H | -2.398586 | 1.203181  | -1.806261 |
| H | -2.174665 | 1.958963  | -0.226351 |
| H | 2.267918  | 1.635756  | -0.821411 |
| O | 2.458640  | 1.613866  | 1.218723  |
| O | 2.067694  | 3.014788  | 1.250456  |
| P | -2.408072 | -0.410950 | -0.050150 |
| O | -3.750192 | -0.659981 | -0.924906 |
| O | -3.046513 | 0.007098  | 1.378829  |
| C | -2.376068 | -0.321228 | 2.612659  |
| H | -3.113941 | -0.172922 | 3.403724  |
| H | -2.040954 | -1.361434 | 2.602448  |
| H | -1.520646 | 0.340544  | 2.762487  |
| C | -4.597746 | -1.772085 | -0.589188 |
| H | -5.370058 | -1.814557 | -1.359124 |
| H | -4.025158 | -2.704576 | -0.586690 |
| H | -5.059812 | -1.615243 | 0.390371  |
| O | -1.452156 | -1.552217 | 0.019147  |
| H | 1.174700  | 2.895799  | 1.642419  |

PBN-alpha-methylthio-O2H.log

35

|   |           |           |           |
|---|-----------|-----------|-----------|
| C | 4.133367  | -0.405346 | 1.024603  |
| C | 2.868716  | 0.168004  | 0.907872  |
| C | 2.201869  | 0.145290  | -0.323906 |
| C | 2.812810  | -0.446813 | -1.433158 |
| C | 4.078689  | -1.022654 | -1.313347 |
| C | 4.739433  | -1.002695 | -0.084323 |
| H | 4.647925  | -0.386045 | 1.981399  |
| H | 2.389016  | 0.633624  | 1.763190  |
| H | 2.299661  | -0.455383 | -2.391929 |
| H | 4.547101  | -1.483605 | -2.178589 |
| H | 5.724866  | -1.450910 | 0.010212  |
| C | 0.841300  | 0.797025  | -0.458748 |
| N | -0.099266 | 0.375364  | 0.627273  |
| O | -0.219664 | 1.167560  | 1.631614  |
| C | -1.167246 | -0.665355 | 0.433631  |
| C | -0.736723 | -1.688347 | -0.629742 |
| H | -1.442507 | -2.523615 | -0.630957 |
| H | -0.734588 | -1.271989 | -1.641687 |
| H | 0.258288  | -2.085979 | -0.408215 |
| C | -1.359495 | -1.367205 | 1.787254  |
| H | -0.444097 | -1.898059 | 2.069245  |
| H | -1.592354 | -0.640979 | 2.567857  |
| H | -2.176751 | -2.090395 | 1.720687  |
| C | -2.432098 | 0.122939  | 0.007528  |
| H | -2.213205 | 0.697416  | -0.900015 |
| H | -2.677979 | 0.830236  | 0.805992  |
| S | -3.889743 | -0.953712 | -0.312582 |
| C | -5.100516 | 0.349635  | -0.727434 |
| H | -4.783713 | 0.919398  | -1.606291 |
| H | -6.044347 | -0.153165 | -0.953469 |
| H | -5.254614 | 1.029072  | 0.116311  |
| H | 0.372201  | 0.547804  | -1.415468 |
| O | 1.076374  | 2.180607  | -0.376388 |
| O | -0.201375 | 2.863339  | -0.491709 |
| H | -0.467471 | 2.815515  | 0.452594  |

PBN-alpha-phosphoryl-HO2.log

39

|   |          |           |           |
|---|----------|-----------|-----------|
| C | 4.247207 | -0.734789 | 0.772391  |
| C | 3.209884 | 0.194061  | 0.691018  |
| C | 2.160800 | -0.003479 | -0.215759 |
| C | 2.156805 | -1.137758 | -1.035530 |



|   |           |           |           |
|---|-----------|-----------|-----------|
| C | 3.193050  | -2.069273 | -0.946003 |
| C | 4.240229  | -1.867838 | -0.045010 |
| H | 5.058558  | -0.577424 | 1.478150  |
| H | 3.200690  | 1.068984  | 1.333212  |
| H | 1.334836  | -1.290362 | -1.730025 |
| H | 3.185660  | -2.947440 | -1.586251 |
| H | 5.049830  | -2.590154 | 0.019616  |
| C | 1.041063  | 1.006878  | -0.336132 |
| N | 0.047588  | 0.901110  | 0.741099  |
| O | 0.433444  | 0.537098  | 1.906784  |
| C | -1.411882 | 1.123294  | 0.484533  |
| C | -2.111041 | 1.408186  | 1.819582  |
| H | -3.180357 | 1.548033  | 1.641775  |
| H | -1.970626 | 0.594804  | 2.530353  |
| H | -1.699825 | 2.324355  | 2.255657  |
| C | -1.629449 | 2.289664  | -0.498015 |
| H | -1.153947 | 3.192286  | -0.104278 |
| H | -1.221631 | 2.090417  | -1.491769 |
| H | -2.702597 | 2.466847  | -0.607496 |
| H | 0.526868  | 0.883106  | -1.289512 |
| P | -2.024919 | -0.462976 | -0.279787 |
| O | -3.593435 | -0.133499 | -0.459533 |
| O | -2.066992 | -1.573448 | 0.896275  |
| C | -0.942039 | -2.448431 | 1.135287  |
| H | -1.338559 | -3.316778 | 1.664787  |
| H | -0.490534 | -2.758815 | 0.190072  |
| H | -0.203090 | -1.933828 | 1.753866  |
| C | -4.450826 | -1.105554 | -1.090744 |
| H | -5.418660 | -0.619866 | -1.223487 |
| H | -4.044147 | -1.400298 | -2.062252 |
| H | -4.560545 | -1.983776 | -0.447789 |
| O | -1.273918 | -0.876879 | -1.499642 |
| O | 1.513952  | 2.364624  | -0.228537 |
| O | 2.272930  | 2.636920  | -1.435122 |
| H | 3.158095  | 2.318498  | -1.171030 |

PBN-alpha-thio-O2H.log

32

|   |           |           |           |
|---|-----------|-----------|-----------|
| C | 3.291568  | 0.093824  | 1.274531  |
| C | 2.012986  | 0.589012  | 1.021459  |
| C | 1.437804  | 0.425084  | -0.246015 |
| C | 2.153869  | -0.227347 | -1.253893 |
| C | 3.433763  | -0.721114 | -0.997952 |
| C | 4.003642  | -0.561416 | 0.266305  |
| H | 3.734818  | 0.223497  | 2.258167  |
| H | 1.452108  | 1.102462  | 1.795865  |
| H | 1.707039  | -0.353265 | -2.236458 |
| H | 3.984646  | -1.228255 | -1.785382 |
| H | 5.000779  | -0.944856 | 0.465802  |
| C | 0.061793  | 0.988579  | -0.532329 |
| H | -0.288654 | 0.691229  | -1.524145 |
| N | -0.966862 | 0.533009  | 0.452369  |
| O | -1.128827 | 1.252746  | 1.503714  |
| C | -2.053865 | -0.425483 | 0.079418  |
| C | -2.795550 | -0.836677 | 1.354215  |
| H | -3.297006 | 0.027464  | 1.795900  |
| H | -3.540527 | -1.595751 | 1.100881  |
| H | -2.113041 | -1.241271 | 2.105218  |
| C | -3.021175 | 0.237739  | -0.918826 |
| H | -3.418013 | 1.156917  | -0.477409 |
| H | -2.532271 | 0.498701  | -1.861288 |
| H | -3.852395 | -0.439688 | -1.135619 |
| S | -1.330619 | -1.890028 | -0.804956 |
| C | -0.353981 | -2.711127 | 0.504349  |
| H | 0.335788  | -2.009296 | 0.979446  |
| H | -0.996301 | -3.179673 | 1.253517  |
| H | 0.228304  | -3.487667 | 0.001457  |
| O | 0.215179  | 2.388184  | -0.441531 |
| O | -1.083236 | 3.008984  | -0.639651 |

H -1.397388 2.983090 0.288941

PBN-CH<sub>2</sub>NHCOMe-HO<sub>2</sub>c.log

38

C -4.567821 0.892637 0.315375  
C -3.178705 0.901667 0.420751  
C -2.439046 -0.251756 0.129149  
C -3.109470 -1.412297 -0.265772  
C -4.502039 -1.417311 -0.375274  
C -5.235168 -0.267713 -0.084877  
H -5.129790 1.795202 0.540935  
H -2.666306 1.811131 0.718540  
H -2.537329 -2.305567 -0.487999  
H -5.011257 -2.325200 -0.687868  
H -6.318737 -0.272849 -0.169513  
C -0.933410 -0.275499 0.342748  
N -0.305305 0.976796 -0.138074  
O -0.733302 1.448312 -1.258068  
C 1.113016 1.323737 0.202322  
C 1.241775 2.853477 0.142181  
H 2.293869 3.143714 0.249930  
H 0.677559 3.324827 0.954034  
C 1.481895 0.832748 1.608266  
H 0.784488 1.244359 2.346318  
H 1.484358 -0.254877 1.692622  
C 1.981131 0.661571 -0.922944  
H 1.919304 1.283322 -1.820174  
H 1.557541 -0.310041 -1.171521  
N 3.380137 0.447532 -0.590820  
H 4.037612 1.201486 -0.728113  
C 3.857549 -0.759645 -0.182996  
O 3.135123 -1.743798 -0.002574  
C 5.355875 -0.848220 0.039459  
H 5.762935 -1.622420 -0.618142  
H 5.885217 0.091256 -0.146330  
H 5.542022 -1.166001 1.069754  
H 2.481776 1.195637 1.863324  
H -0.704202 -0.384392 1.402925  
O -0.358141 -1.409771 -0.321591  
O 0.433284 -2.170374 0.634661  
H 0.862411 3.231487 -0.809313  
H 1.345487 -2.046677 0.273087

PBN-NHCOMe-HO<sub>2</sub>c.log

35

C -4.019690 0.342666 -1.417524  
C -2.723222 0.644412 -1.005253  
C -2.195939 0.040210 0.140250  
C -2.977037 -0.861369 0.868064  
C -4.273113 -1.168502 0.451890  
C -4.795742 -0.565565 -0.692758  
H -4.425994 0.816498 -2.307020  
H -2.116181 1.350892 -1.559976  
H -2.573264 -1.325206 1.765770  
H -4.874138 -1.869463 1.024711  
H -5.806782 -0.797852 -1.016794  
O 0.049387 -0.558194 -1.407685  
C 1.603127 -0.705494 0.368023  
N 2.483329 0.107939 -0.489964  
H 2.057821 0.356381 -1.374836  
C 3.848305 0.140878 -0.398865  
O 4.485491 -0.370180 0.517594  
C 4.543347 0.881726 -1.534021  
H 5.088341 0.157021 -2.148831  
H 3.859522 1.446377 -2.174859  
H 5.280452 1.564953 -1.103791  
C 1.865753 -2.206031 0.158593  
H 1.672049 -2.471763 -0.883445  
H 2.907321 -2.424055 0.405644

H 1.211375 -2.803288 0.802452  
C 1.764351 -0.308423 1.837017  
H 1.118672 -0.914602 2.480314  
H 2.803704 -0.485092 2.116504  
H 1.542114 0.751931 1.982076  
N 0.218893 -0.418231 -0.143656  
C -0.790373 0.341816 0.604526  
H -0.685903 0.104999 1.665264  
O -0.400343 1.711102 0.400818  
O -1.207293 2.506964 1.321802  
H -0.491208 2.938823 1.822290

PBN-O2H.log

31

C -3.072931 -0.296990 1.343319  
C -1.776394 0.153226 1.102682  
C -1.298622 0.239301 -0.211323  
C -2.128996 -0.120838 -1.276447  
C -3.426502 -0.574390 -1.033311  
C -3.899069 -0.662979 0.276802  
H -3.440825 -0.361785 2.363683  
H -1.126193 0.440298 1.923328  
H -1.762137 -0.043690 -2.297304  
H -4.066184 -0.855313 -1.865478  
H -4.909136 -1.015591 0.467595  
C 0.097929 0.763942 -0.471749  
H 0.399460 0.603706 -1.512279  
N 1.121375 0.103631 0.400393  
O 1.510611 0.757485 1.436296  
C 2.007960 -1.004502 -0.090558  
C 1.260160 -1.890542 -1.099849  
H 1.888119 -2.755011 -1.339605  
H 0.317330 -2.261630 -0.686437  
H 1.048940 -1.376121 -2.042483  
C 3.251867 -0.360838 -0.733684  
H 2.977348 0.277223 -1.580516  
H 3.777250 0.254861 0.002365  
H 3.937363 -1.136167 -1.093257  
C 2.404923 -1.843468 1.134439  
H 1.523775 -2.313566 1.584195  
H 3.099176 -2.632651 0.827486  
H 2.886445 -1.221047 1.890310  
O 0.042853 2.139288 -0.189926  
O 1.360419 2.700746 -0.436048  
H 1.766620 2.479374 0.431151

PBN-alpha-2CH2OH-OOH.com.log

33

C -3.717668 -0.826431 1.465899  
C -2.420016 -0.314984 1.412592  
C -1.844560 0.032054 0.186844  
C -2.586546 -0.123765 -0.991430  
C -3.885790 -0.626385 -0.937119  
C -4.452596 -0.981285 0.289933  
H -4.155046 -1.094378 2.423767  
H -1.851704 -0.183716 2.330890  
H -2.134514 0.137764 -1.942004  
H -4.454999 -0.748363 -1.854705  
H -5.465116 -1.374126 0.328428  
C -0.443271 0.600510 0.152836  
H -0.151012 0.920022 1.155238  
N 0.549911 -0.348419 -0.353910  
O 0.180752 -1.149630 -1.285748  
C 2.037629 -0.195577 -0.142849  
C 2.676311 0.280552 -1.454548  
H 3.758386 0.333339 -1.331974  
H 2.436064 -0.420140 -2.258133  
H 2.290175 1.268962 -1.723143  
C 2.290926 0.821228 0.988297

|   |           |           |           |
|---|-----------|-----------|-----------|
| H | 1.813445  | 1.775118  | 0.723564  |
| H | 1.835756  | 0.451325  | 1.923279  |
| C | 2.518133  | -1.618901 | 0.234970  |
| O | 3.930556  | -1.705933 | 0.140781  |
| H | 4.159129  | -2.646651 | 0.115320  |
| H | 2.027889  | -2.312971 | -0.457886 |
| H | 2.167246  | -1.849852 | 1.255222  |
| O | 3.690666  | 0.984657  | 1.141111  |
| H | 3.830103  | 1.726547  | 1.748221  |
| O | -0.339189 | 1.740696  | -0.727418 |
| O | -1.089153 | 2.819901  | -0.108221 |
| H | -1.979549 | 2.656436  | -0.475304 |

PBN-alpha-2COOH-HO2.com.log

31

|   |           |           |           |
|---|-----------|-----------|-----------|
| C | -3.489393 | -1.743349 | -0.036189 |
| C | -2.226157 | -1.157380 | 0.045833  |
| C | -2.102278 | 0.234939  | 0.118078  |
| C | -3.253857 | 1.031364  | 0.110372  |
| C | -4.514370 | 0.440107  | 0.020602  |
| C | -4.636158 | -0.948022 | -0.052084 |
| H | -3.574196 | -2.825158 | -0.093338 |
| H | -1.341368 | -1.785588 | 0.050264  |
| H | -3.158853 | 2.110124  | 0.164841  |
| H | -5.401245 | 1.067966  | 0.007101  |
| H | -5.618541 | -1.407593 | -0.121431 |
| C | -0.741992 | 0.892573  | 0.299105  |
| H | -0.517331 | 1.038306  | 1.358036  |
| N | 0.347266  | 0.074378  | -0.276811 |
| O | 0.267909  | -0.229843 | -1.520367 |
| C | 1.617314  | -0.278538 | 0.389833  |
| C | 1.534152  | -0.238170 | 1.926496  |
| H | 1.393744  | 0.784526  | 2.285396  |
| H | 0.710317  | -0.870424 | 2.264720  |
| H | 2.463920  | -0.624566 | 2.349449  |
| C | 1.876308  | -1.746966 | -0.048553 |
| O | 1.270175  | -2.680162 | 0.421504  |
| O | 2.817016  | -1.860601 | -0.997103 |
| H | 2.863599  | -2.806261 | -1.237061 |
| O | -0.789538 | 2.158465  | -0.326822 |
| O | 0.327855  | 2.932904  | 0.179301  |
| C | 2.738903  | 0.667567  | -0.089578 |
| O | 2.600210  | 1.629434  | -0.812930 |
| O | 3.922537  | 0.327442  | 0.451546  |
| H | 4.580531  | 0.964942  | 0.113517  |
| H | 1.024418  | 2.687209  | -0.468327 |

PBN-CH2CONH2-2-OOH.com.log

39

|   |           |           |           |
|---|-----------|-----------|-----------|
| C | 3.577013  | -2.138996 | 0.117560  |
| C | 2.374628  | -1.466432 | 0.327489  |
| C | 2.308063  | -0.074383 | 0.190905  |
| C | 3.462308  | 0.634395  | -0.156051 |
| C | 4.664498  | -0.042428 | -0.371636 |
| C | 4.726653  | -1.428736 | -0.235076 |
| H | 3.613830  | -3.219706 | 0.224970  |
| H | 1.484833  | -2.031034 | 0.589542  |
| H | 3.413208  | 1.712138  | -0.259185 |
| H | 5.553256  | 0.519413  | -0.646074 |
| H | 5.663060  | -1.954186 | -0.402016 |
| C | 1.027853  | 0.682102  | 0.521138  |
| N | -0.167666 | -0.078724 | 0.075832  |
| O | -0.124768 | -0.507590 | -1.138590 |
| C | -1.513303 | -0.080068 | 0.753722  |
| C | -1.942391 | -1.554247 | 1.058542  |
| H | -2.651277 | -1.524862 | 1.888886  |
| H | -1.055191 | -2.097348 | 1.407770  |
| C | -1.442280 | 0.653781  | 2.103372  |
| H | -0.793536 | 0.119819  | 2.806888  |

H -1.097258 1.682215 2.004045  
H -2.446222 0.677485 2.536325  
C -2.533131 0.599946 -0.209421  
H -2.751251 -0.071929 -1.040908  
H -3.464450 0.766310 0.340122  
C -2.040246 1.942782 -0.733323  
O -1.955759 2.940096 -0.008446  
N -1.709468 1.971088 -2.049509  
H -1.221589 2.797520 -2.373494  
H -1.475909 1.101504 -2.511161  
C -2.660868 -2.394298 -0.011713  
O -3.799592 -2.798981 0.183741  
N -1.935694 -2.715792 -1.120639  
H -2.430041 -3.203063 -1.856487  
H -1.123329 -2.155326 -1.362503  
H 0.946779 0.849652 1.593935  
O 1.059671 1.958985 -0.113302  
O 0.660364 2.982951 0.836998  
H -0.247222 3.191197 0.503303

PBN-CH2COOMe-2-OOH.com.log

43

C 3.437684 -3.084436 -0.425111  
C 2.364732 -2.242254 -0.139954  
C 2.585410 -0.896385 0.178005  
C 3.894570 -0.407838 0.208638  
C 4.968185 -1.252665 -0.080867  
C 4.744447 -2.591901 -0.397682  
H 3.251784 -4.125604 -0.675260  
H 1.351894 -2.630893 -0.178310  
H 4.066351 0.633609 0.454959  
H 5.980903 -0.858891 -0.058261  
H 5.580406 -3.248617 -0.623587  
C 1.431916 0.006150 0.594637  
N 0.229121 -0.251342 -0.214845  
O 0.393009 -0.381750 -1.483322  
C -1.185967 -0.007979 0.240724  
C -1.962195 -1.255909 -0.251576  
H -1.797523 -1.371058 -1.328667  
H -1.532626 -2.151411 0.212458  
C -1.281763 0.103599 1.767060  
H -0.930624 -0.818338 2.245210  
H -0.714613 0.947098 2.159526  
H -2.330108 0.247223 2.039014  
C -1.725342 1.252135 -0.499672  
H -2.750017 1.424709 -0.158140  
H -1.741048 1.047480 -1.571202  
C 0.298989 4.245832 -1.291119  
H -0.224427 5.013071 -0.715835  
H 1.243802 3.997929 -0.801334  
H 0.474582 4.578555 -2.313780  
O -0.512295 3.061114 -1.410426  
C -0.926649 2.513851 -0.264273  
O -0.702580 3.009839 0.832711  
C -3.456908 -1.274938 0.006791  
O -4.150761 -0.351181 0.382307  
O -3.948311 -2.502832 -0.258276  
C -5.369154 -2.653966 -0.088546  
H -5.583641 -3.690651 -0.348385  
H -5.655343 -2.448691 0.946193  
H -5.909201 -1.971341 -0.749673  
H 1.183360 -0.153681 1.643132  
O 1.818664 1.385107 0.471999  
O 1.682364 2.034153 1.764679  
H 0.883806 2.583519 1.586150

PBN-CH2NHCOMe-2-OOH.com.log

45

C -4.895810 1.220178 0.736514

C -3.586992 0.779520 0.915216  
C -3.043380 -0.190676 0.063555  
C -3.827424 -0.717092 -0.964654  
C -5.138581 -0.269441 -1.145958  
C -5.676323 0.697572 -0.298335  
H -5.306898 1.973094 1.403788  
H -2.981230 1.196541 1.715282  
H -3.411086 -1.478423 -1.613692  
H -5.739128 -0.684055 -1.951272  
H -6.697557 1.041852 -0.438628  
C -1.639588 -0.711822 0.320990  
N -0.661790 0.412864 0.377973  
O -0.891075 1.451211 -0.351185  
C 0.762432 0.173781 0.759567  
C 1.366808 1.512841 1.273178  
H 2.310591 1.283995 1.772028  
H 0.682513 1.940449 2.013024  
C 0.847903 -0.830117 1.919181  
H 0.294869 -0.454415 2.788034  
H 0.461347 -1.813574 1.652639  
C 1.485498 -0.310843 -0.534426  
H 1.577989 0.538573 -1.213582  
H 0.866721 -1.049878 -1.034466  
N 2.789861 -0.895888 -0.314857  
H 3.565709 -0.253690 -0.181654  
C 2.958059 -2.240950 -0.272788  
O 2.019702 -3.041437 -0.386033  
C 4.380057 -2.733535 -0.087800  
H 4.660792 -3.335215 -0.958088  
H 5.105338 -1.924395 0.036212  
H 4.417614 -3.390273 0.786575  
N 1.667463 2.523072 0.278047  
H 0.869954 2.961371 -0.163364  
C 2.897426 2.619106 -0.299990  
O 3.841014 1.885274 0.010048  
C 3.053851 3.711706 -1.342703  
H 2.130331 4.264067 -1.538369  
H 3.821050 4.413736 -1.000697  
H 3.413580 3.266707 -2.275370  
H 1.893361 -0.950669 2.214212  
H -1.598309 -1.233560 1.277577  
O -1.263375 -1.658996 -0.683354  
O -0.797487 -2.880859 -0.042610  
H 0.159865 -2.895464 -0.302544

PBN-CH2OCOMe-2-OOHb.com.log

43

C 0.367477 -0.553131 -1.031294  
N -0.401561 0.248086 -0.047443  
O -0.450832 -0.114768 1.183970  
C -1.188940 1.468264 -0.401771  
C -2.595705 1.296008 0.212430  
H -3.231017 2.138576 -0.078891  
H -2.527217 1.252273 1.298673  
C -0.510134 2.670226 0.296137  
H -0.430921 2.470265 1.366198  
H -1.111007 3.574026 0.146209  
C -1.285692 1.694290 -1.915793  
H -1.684780 0.812434 -2.419178  
H -0.315271 1.954869 -2.342737  
O -3.177390 0.102862 -0.320821  
O 0.763276 2.923657 -0.295026  
C -3.550378 -0.947569 0.453572  
O -3.672308 -2.026307 -0.087981  
C 1.959217 2.648021 0.322132  
O 2.959061 2.737145 -0.345569  
C 1.953980 2.280554 1.790713  
H 1.477714 3.059922 2.396431  
H 1.422155 1.339161 1.964356  
H 2.992286 2.168747 2.102873

C -3.810942 -0.725411 1.924403  
H -2.855768 -0.617270 2.450621  
H -4.414045 0.168904 2.109022  
H -4.325714 -1.605617 2.310217  
H -1.959524 2.537465 -2.103178  
H 0.725884 0.143639 -1.791722  
O -0.494276 -1.370756 -1.815814  
O -1.035170 -2.447346 -1.005950  
H -1.994071 -2.230453 -1.016216  
C 1.566772 -1.238553 -0.410586  
C 2.836597 -0.791199 -0.798844  
C 1.465727 -2.288216 0.514981  
C 3.990262 -1.382764 -0.281609  
H 2.930596 0.035054 -1.499114  
C 2.619840 -2.882389 1.021968  
H 0.489979 -2.636050 0.823191  
C 3.883121 -2.434023 0.627545  
H 4.966194 -1.020574 -0.592436  
H 2.531274 -3.700363 1.732111  
H 4.778091 -2.902136 1.029316

PBN-CH2OCONHMe-2-OOH.com.log  
47

C 4.354486 -1.509886 1.851182  
C 3.235939 -1.622213 1.024695  
C 2.826224 -0.529543 0.242790  
C 3.550466 0.668937 0.315985  
C 4.664576 0.778037 1.149021  
C 5.071894 -0.313607 1.916078  
H 4.661426 -2.360883 2.453707  
H 2.663737 -2.539961 1.003467  
H 3.231705 1.520947 -0.278861  
H 5.213602 1.714810 1.195444  
H 5.940781 -0.232729 2.564110  
C 1.679498 -0.584230 -0.744954  
H 1.573104 0.398646 -1.208405  
N 0.383771 -0.935665 -0.140489  
O 0.361004 -1.759140 0.847066  
C -0.909180 -0.757706 -0.878599  
C -0.987732 0.605128 -1.584825  
H -1.936450 0.645733 -2.122774  
H -0.169396 0.751369 -2.290496  
C -1.097540 -1.876108 -1.922557  
H -0.414946 -1.750893 -2.765723  
H -0.885645 -2.843219 -1.457859  
H -2.129534 -1.872211 -2.285296  
C -2.010578 -0.850904 0.202954  
H -1.814487 -0.123578 0.996171  
H -2.011880 -1.859669 0.624435  
C -4.413873 -0.428119 0.277111  
O -5.421498 -0.050622 -0.282183  
O -3.256873 -0.566614 -0.440627  
N -4.334052 -0.706371 1.617081  
H -3.549656 -1.238809 1.962823  
C -5.550595 -0.716643 2.416681  
H -6.145567 -1.626562 2.263093  
H -5.281633 -0.638366 3.473546  
H -6.162222 0.141652 2.135266  
O -1.016143 1.690281 -0.641154  
C 0.000057 2.597522 -0.669389  
O 0.998781 2.507690 -1.371591  
N -0.265839 3.603043 0.199634  
H -1.148887 3.564608 0.687956  
C 0.628511 4.726693 0.402628  
H 0.141862 5.671951 0.135581  
H 0.963303 4.782230 1.444993  
H 1.495934 4.582142 -0.242190  
O 1.957689 -1.385229 -1.906914  
O 2.119201 -2.776469 -1.529861  
H 3.087487 -2.817569 -1.413248

PBN-CH2OMe-2-OOH.com.log

39

|   |           |           |           |
|---|-----------|-----------|-----------|
| C | -4.328792 | 1.435091  | 0.610713  |
| C | -3.061842 | 0.967198  | 0.963304  |
| C | -2.390214 | 0.054989  | 0.144163  |
| C | -3.004045 | -0.397425 | -1.031168 |
| C | -4.273194 | 0.063340  | -1.378733 |
| C | -4.936585 | 0.981755  | -0.560694 |
| H | -4.842097 | 2.144390  | 1.254180  |
| H | -2.593392 | 1.311846  | 1.882604  |
| H | -2.477083 | -1.098472 | -1.669377 |
| H | -4.742858 | -0.289071 | -2.293112 |
| H | -5.925314 | 1.339923  | -0.834813 |
| C | -1.026150 | -0.454418 | 0.552441  |
| N | 0.060690  | 0.123664  | -0.238385 |
| O | -0.154826 | 0.370535  | -1.481254 |
| C | 1.492338  | 0.113559  | 0.206039  |
| C | 2.057947  | 1.486844  | -0.239951 |
| H | 2.173121  | 1.502246  | -1.332863 |
| H | 1.323091  | 2.266946  | 0.024068  |
| C | 1.624673  | -0.057681 | 1.720488  |
| H | 1.139738  | 0.761246  | 2.263417  |
| H | 1.204735  | -1.012421 | 2.051154  |
| H | 2.686689  | -0.043826 | 1.966805  |
| C | 2.156240  | -1.068263 | -0.538752 |
| H | 2.022809  | -0.920537 | -1.621683 |
| H | 1.635695  | -1.997685 | -0.257702 |
| C | 4.176343  | -2.221451 | -0.828436 |
| H | 4.139169  | -2.138893 | -1.926836 |
| H | 5.220389  | -2.198710 | -0.505303 |
| H | 3.731802  | -3.188171 | -0.540777 |
| O | 3.524123  | -1.138679 | -0.200795 |
| O | 3.287645  | 1.734568  | 0.403630  |
| C | 3.872342  | 2.950859  | -0.006370 |
| H | 4.810209  | 3.058091  | 0.544744  |
| H | 4.088773  | 2.955519  | -1.086741 |
| H | 3.223147  | 3.813463  | 0.218514  |
| H | -0.843794 | -0.240400 | 1.606696  |
| O | -0.897812 | -1.880347 | 0.359193  |
| O | -1.753593 | -2.518934 | 1.343415  |
| H | -2.598325 | -2.554662 | 0.853933  |

PBN-CH2POOMe-2-OOH.com.log

53

|   |           |           |           |
|---|-----------|-----------|-----------|
| C | 5.455663  | -0.419758 | -0.331003 |
| C | 4.136463  | -0.822882 | -0.539501 |
| C | 3.188026  | -0.687001 | 0.487876  |
| C | 3.589247  | -0.134425 | 1.711765  |
| C | 4.908018  | 0.274113  | 1.914710  |
| C | 5.846145  | 0.128372  | 0.892874  |
| H | 6.180135  | -0.527134 | -1.133975 |
| H | 3.832031  | -1.216202 | -1.500130 |
| H | 2.862996  | -0.019292 | 2.512716  |
| H | 5.199036  | 0.702866  | 2.869708  |
| H | 6.874816  | 0.443560  | 1.046447  |
| C | 1.759652  | -1.173312 | 0.375988  |
| N | 1.000751  | -0.575357 | -0.730269 |
| O | 1.627736  | -0.152950 | -1.767019 |
| C | -0.502177 | -0.726100 | -0.892442 |
| C | -0.723414 | -1.770637 | -2.003877 |
| H | -1.781925 | -1.837139 | -2.259308 |
| H | -0.148963 | -1.483335 | -2.887765 |
| H | -0.380074 | -2.754978 | -1.672367 |
| C | -1.121121 | -1.178950 | 0.452511  |
| H | -0.744510 | -2.173720 | 0.708231  |
| H | -0.816607 | -0.486573 | 1.245090  |
| C | -1.022133 | 0.652594  | -1.374975 |
| H | -2.109456 | 0.621240  | -1.473480 |



H -0.594908 0.865872 -2.357669  
H 1.235983 -0.936077 1.303665  
P -0.621468 2.078848 -0.296086  
O -1.916297 3.005881 -0.580089  
O 0.528597 2.956390 -1.022927  
C 1.909171 2.881843 -0.612877  
H 2.397238 2.047796 -1.121038  
H 2.367960 3.827359 -0.909883  
H 1.981437 2.754230 0.470025  
C -1.950106 4.344224 -0.056218  
H -1.796733 4.339122 1.027650  
H -1.184280 4.960081 -0.536340  
H -2.941359 4.739006 -0.285678  
O -0.324931 1.762418 1.134811  
P -2.924583 -1.289385 0.714418  
O -3.267556 -1.967353 1.991289  
O -3.536418 0.209847 0.572401  
O -3.487098 -1.966361 -0.641537  
C -4.884868 -2.310571 -0.706211  
H -5.016834 -2.887551 -1.622901  
H -5.169413 -2.913657 0.160318  
H -5.494744 -1.402922 -0.746294  
C -3.694425 1.029558 1.750945  
H -4.119845 0.441517 2.567618  
H -2.727327 1.447187 2.044317  
H -4.375396 1.835084 1.469959  
O 1.640640 -2.609308 0.376820  
O 2.255440 -3.153308 -0.817838

PBN-CH2SMe-2-OOH.com.log

39

C 4.442211 -0.591843 1.813069  
C 3.178157 -0.070539 1.532629  
C 2.710602 -0.014289 0.216451  
C 3.527032 -0.474105 -0.825215  
C 4.793201 -0.986272 -0.545825  
C 5.252025 -1.048687 0.772720  
H 4.795644 -0.631887 2.839728  
H 2.552345 0.297215 2.342916  
H 3.159217 -0.437570 -1.845003  
H 5.420764 -1.343966 -1.357593  
H 6.239074 -1.449603 0.987049  
C 1.348037 0.577779 -0.065935  
H 1.005850 1.143774 0.801924  
N 0.341749 -0.432860 -0.405730  
O 0.736206 -1.459413 -1.063935  
C -1.159301 -0.152770 -0.428001  
C -1.777127 -1.437834 0.180686  
H -1.218964 -2.288187 -0.216954  
H -1.650783 -1.416775 1.269871  
C -1.426473 1.102710 0.431336  
H -1.056528 0.937377 1.449878  
H -0.885363 1.945919 -0.006638  
C -1.551986 0.062238 -1.899442  
H -1.294640 -0.824816 -2.482750  
H -1.009258 0.921430 -2.304251  
S -3.558645 -1.696374 -0.203295  
S -3.195677 1.618916 0.538788  
C -3.802528 -3.210504 0.787168  
H -4.839195 -3.523552 0.638101  
H -3.138966 -4.014460 0.453039  
H -3.641756 -3.020204 1.853030  
C -2.910747 3.380625 0.944086  
H -2.361671 3.891496 0.146850  
H -3.897465 3.840843 1.044342  
H -2.374933 3.494957 1.891631  
H -2.623638 0.251617 -1.992637  
O 1.365510 1.472455 -1.199968  
O 2.115410 2.648993 -0.796028  
H 3.021546 2.380401 -1.043212

PBN-CONH2-2-OOH.com.log

33

C -3.755029 -1.660364 -0.383008  
C -2.451922 -1.198137 -0.550835  
C -2.116811 0.115368 -0.197745  
C -3.100678 0.961193 0.318769  
C -4.405548 0.492907 0.490880  
C -4.736603 -0.815432 0.141605  
H -4.004213 -2.680984 -0.660652  
H -1.691254 -1.861762 -0.953533  
H -2.842701 1.980287 0.581895  
H -5.163089 1.157413 0.897464  
H -5.752830 -1.176734 0.274070  
C -0.713532 0.631881 -0.464414  
N 0.303523 -0.334205 0.049837  
O 0.068572 -0.827589 1.218946  
C 1.739972 -0.224126 -0.358193  
C 1.889558 0.172819 -1.831538  
H 1.350710 -0.537683 -2.467362  
H 1.530724 1.183727 -2.019473  
H 2.950047 0.127060 -2.080965  
C 2.372704 0.868210 0.567040  
N 2.550847 0.496567 1.854316  
H 2.797265 1.227347 2.510063  
H 2.044954 -0.305591 2.209091  
O 2.656793 1.986679 0.142018  
C 2.530522 -1.563737 -0.183998  
O 3.702451 -1.587093 -0.526461  
N 1.857215 -2.649740 0.275162  
H 2.411130 -3.480903 0.435481  
H 0.985290 -2.529602 0.775358  
H -0.542588 0.757446 -1.533186  
O -0.521555 1.893749 0.162778  
O 0.138730 2.799420 -0.757992  
H 1.069723 2.746788 -0.429142

PBN-COOMe-2-OOH.com.log

37

C 4.610053 -0.609544 0.764281  
C 3.255087 -0.944717 0.806449  
C 2.321986 -0.206478 0.074119  
C 2.755383 0.867323 -0.714808  
C 4.107751 1.197823 -0.761738  
C 5.037167 0.461340 -0.020815  
H 5.328748 -1.188539 1.337659  
H 2.921360 -1.785572 1.409929  
H 2.026454 1.440144 -1.279176  
H 4.438570 2.034133 -1.371665  
H 6.091542 0.722013 -0.058652  
C 0.868701 -0.607617 0.094244  
H 0.735906 -1.586481 0.560436  
N 0.016370 0.367482 0.789775  
O 0.473548 1.510078 1.136750  
C -1.448528 0.176226 0.983859  
C -1.756657 0.243157 2.490414  
H -2.836391 0.236163 2.651889  
H -1.301683 -0.614299 2.991315  
H -1.344549 1.170204 2.893543  
C -3.286885 -2.375156 -1.022792  
H -2.453025 -2.882497 -1.513421  
H -3.688690 -3.011267 -0.230723  
H -4.062028 -2.114896 -1.742923  
C -1.892607 -1.208118 0.464791  
O -1.465808 -2.249189 0.914731  
O -2.836339 -1.118792 -0.477563  
C -2.203831 1.312458 0.251179  
O -3.196158 1.842327 0.696106  
O -1.639546 1.617616 -0.923193

C -2.303689 2.648986 -1.671814  
H -2.315200 3.583255 -1.104640  
H -1.723860 2.761136 -2.587949  
H -3.331405 2.353265 -1.898101  
O 0.300764 -0.677580 -1.230706  
O 0.790627 -1.905138 -1.833398  
H 1.599374 -1.577809 -2.271980

PBN-NHCOMe-2-OOH.com.log

39

C 3.574328 -0.355203 -1.808195  
C 2.489588 0.312571 -1.238736  
C 2.166013 0.107679 0.106962  
C 2.932936 -0.773295 0.880222  
C 4.020846 -1.431841 0.308835  
C 4.343968 -1.224858 -1.034225  
H 3.816862 -0.194070 -2.855075  
H 1.878968 0.974191 -1.846457  
H 2.671699 -0.939116 1.918398  
H 4.615798 -2.111063 0.913435  
H 5.191781 -1.741814 -1.476166  
C 0.976135 0.828290 0.702095  
N -0.184922 -0.062008 0.899177  
O -0.018588 -1.112296 1.607516  
C -1.608433 0.192296 0.423160  
N -1.688034 1.488202 -0.249924  
H -2.050833 2.244735 0.312707  
C -1.322360 1.761357 -1.540258  
O -0.788436 0.930096 -2.272742  
C -1.636944 3.167317 -2.020753  
H -2.531101 3.132185 -2.653387  
H -1.813989 3.878411 -1.208204  
H -0.808045 3.520439 -2.638457  
N -1.964356 -0.854779 -0.508145  
H -1.446329 -0.778192 -1.378213  
C -2.590689 -2.057291 -0.240993  
O -3.189754 -2.323887 0.787899  
C -2.475805 -3.050267 -1.390730  
H -1.526013 -3.591943 -1.305645  
H -3.291857 -3.770502 -1.313397  
H -2.502628 -2.565363 -2.372354  
C -2.508279 0.257499 1.660935  
H -2.210918 1.131873 2.250454  
H -3.555271 0.346036 1.364266  
H -2.390140 -0.646433 2.251579  
H 0.654951 1.647316 0.062365  
O 1.419058 1.347254 1.952706  
O 0.316013 2.102816 2.533127  
H 0.084065 1.506020 3.268413

PBN-OCOMe-2-OOH.com.log

37

C -3.716673 1.186000 -1.523524  
C -2.640057 1.262564 -0.639297  
C -2.298842 0.157644 0.147804  
C -3.036849 -1.028580 0.045066  
C -4.116131 -1.097216 -0.835074  
C -4.457858 0.007146 -1.619612  
H -3.975213 2.046485 -2.134519  
H -2.053043 2.175151 -0.571015  
H -2.759312 -1.884713 0.648996  
H -4.690691 -2.016542 -0.910256  
H -5.298985 -0.052150 -2.305353  
C -1.120950 0.262629 1.090145  
H -0.780432 1.292585 1.182128  
N 0.037013 -0.532174 0.611147  
O -0.072913 -1.798472 0.515739  
C 1.385812 0.044989 0.322436  
C 2.286989 -0.079188 1.545300

H 1.900605 0.593412 2.314614  
H 2.259388 -1.102958 1.914255  
H 3.321844 0.172444 1.308466  
C 2.408507 -1.846044 -0.892866  
O 3.045272 -2.326706 0.005981  
O 1.823485 -0.587382 -0.868309  
C 2.155520 -2.472317 -2.238581  
H 1.098139 -2.753442 -2.293358  
H 2.350125 -1.759599 -3.045442  
H 2.779608 -3.359398 -2.352032  
O 1.094939 1.389412 -0.015863  
C 1.945294 2.339521 -0.551059  
O 1.456405 3.410092 -0.800102  
C 3.403211 2.010123 -0.766000  
H 3.931588 2.012812 0.193556  
H 3.540721 1.032367 -1.228892  
H 3.827752 2.792574 -1.396152  
O -1.566142 -0.224120 2.342653  
O -0.515772 0.064661 3.315347  
H -1.021211 0.632681 3.924983

PBN-OCONHMe-2-OOH.com.log

41

C 4.753343 -1.060581 -1.168048  
C 3.414068 -0.675222 -1.150711  
C 2.893828 -0.003047 -0.041478  
C 3.724362 0.282870 1.045283  
C 5.063870 -0.107993 1.031417  
C 5.579970 -0.780942 -0.076908  
H 5.154133 -1.579446 -2.034849  
H 2.766608 -0.877982 -1.996822  
H 3.323976 0.816962 1.904527  
H 5.703824 0.121121 1.879377  
H 6.624585 -1.080886 -0.093838  
C 1.444689 0.421126 -0.001864  
N 0.579173 -0.663338 0.494930  
O 0.861598 -1.884738 0.236008  
C -0.818639 -0.415889 0.943416  
C -1.091869 -1.254661 2.185278  
H -0.868864 -2.300492 1.968950  
H -0.433265 -0.907596 2.984803  
H -2.129576 -1.135959 2.495970  
C -1.425285 1.960490 0.451948  
O -0.669872 2.841740 0.072076  
O -0.972235 0.938029 1.297582  
N -2.748457 1.936399 0.256402  
H -3.275953 1.139329 0.609226  
C -3.399002 2.955162 -0.553222  
H -3.008892 2.956410 -1.576818  
H -4.469524 2.742652 -0.576930  
H -3.238732 3.949143 -0.124366  
O -1.601879 -0.798522 -0.193500  
C -2.906348 -1.209807 -0.072369  
O -3.721274 -0.724971 0.704699  
N -3.155016 -2.176120 -0.978841  
H -2.364567 -2.504690 -1.516503  
C -4.476864 -2.734607 -1.203055  
H -5.173034 -2.228712 -0.533323  
H -4.795082 -2.578660 -2.239707  
H -4.488819 -3.807941 -0.984321  
H 1.306024 1.278499 0.659325  
O 0.896852 0.743714 -1.285706  
O 1.383140 2.066930 -1.630275  
H 0.689874 2.600807 -1.177333

PBN-OMe-2-OOH.com.log

33

C -3.711516 0.180723 1.055263  
C -2.430672 0.674696 0.812196

C -1.693353 0.194531 -0.279204  
C -2.250439 -0.778843 -1.115777  
C -3.530906 -1.274803 -0.865868  
C -4.263868 -0.793779 0.219801  
H -4.280607 0.557075 1.901151  
H -1.990192 1.421427 1.462300  
H -1.678881 -1.152231 -1.962199  
H -3.954386 -2.032815 -1.519415  
H -5.262197 -1.176486 0.415131  
C -0.299564 0.710913 -0.567186  
N 0.664255 0.382456 0.510954  
O 0.479504 0.895920 1.666187  
C 1.685977 -0.708136 0.429151  
C 1.269439 -1.870616 1.327362  
H 2.075110 -2.605522 1.397990  
H 1.062440 -1.477601 2.324081  
H 0.368517 -2.345811 0.929080  
C 3.403643 0.966899 0.348711  
H 2.810030 1.816769 0.695926  
H 4.431526 1.059309 0.705860  
H 3.391941 0.941238 -0.745915  
O 2.913668 -0.257857 0.906922  
O 1.730374 -1.036031 -0.944982  
C 2.623289 -2.089365 -1.294936  
H 2.230070 -3.068840 -0.994667  
H 2.712866 -2.060653 -2.383198  
H 3.609178 -1.939606 -0.842489  
H 0.099881 0.287372 -1.486419  
O -0.425235 2.116905 -0.682081  
O 0.848959 2.629004 -1.181661  
H 0.534582 3.042330 -2.006052

PBN-POOMe-2-OOH.com.log

47

C 4.753687 -0.782987 1.266171  
C 3.615901 -1.150539 0.548282  
C 2.919970 -0.191887 -0.198747  
C 3.369572 1.132534 -0.220059  
C 4.504873 1.498600 0.504929  
C 5.199437 0.541182 1.246345  
H 5.290371 -1.529391 1.845780  
H 3.255100 -2.173895 0.569330  
H 2.823492 1.872342 -0.800212  
H 4.851097 2.528507 0.482832  
H 6.087214 0.824473 1.805770  
C 1.700463 -0.572884 -1.007169  
N 0.498781 -0.746191 -0.179103  
O 0.612644 -1.214100 1.006896  
C -0.836894 -0.290293 -0.625837  
C -1.056999 -0.595323 -2.125709  
H -0.373080 -0.018785 -2.751567  
H -0.894905 -1.661065 -2.302498  
H -2.079830 -0.341600 -2.410426  
H 1.492506 0.195067 -1.753541  
P -2.097897 -1.296466 0.345236  
O -3.424785 -0.697235 -0.365726  
O -2.283419 -0.693201 1.824263  
C -1.601867 -1.242506 2.970060  
H -2.283895 -1.123616 3.815142  
H -1.373716 -2.298701 2.813536  
H -0.680162 -0.684087 3.137301  
C -4.709260 -1.170333 0.077885  
H -4.911681 -0.815353 1.092477  
H -5.445889 -0.757158 -0.613357  
H -4.747129 -2.263347 0.048267  
O -1.906077 -2.763233 0.243404  
P -0.861630 1.566203 -0.363667  
O 0.025416 2.256285 -1.343632  
O -0.463576 1.674934 1.185738  
O -2.383143 2.106380 -0.345004

C -3.042219 2.531902 -1.551195  
H -2.323614 2.949490 -2.261211  
H -3.570502 1.682891 -1.994557  
H -3.762967 3.298249 -1.258785  
C -0.231032 2.972541 1.767040  
H -1.180527 3.500850 1.893604  
H 0.227802 2.791923 2.739804  
H 0.445640 3.559483 1.139579  
O 1.846613 -1.843185 -1.668698  
O 2.836967 -1.648691 -2.711363  
H 3.657211 -1.862651 -2.226086

PBN-SMe-2-OOH.com.log

33

C -3.346483 -1.245887 1.100336  
C -2.115671 -0.601711 0.948756  
C -1.840575 0.115567 -0.218480  
C -2.809196 0.183927 -1.229750  
C -4.035627 -0.456855 -1.074773  
C -4.306958 -1.176324 0.092435  
H -3.551757 -1.799047 2.012778  
H -1.377958 -0.653937 1.741001  
H -2.602745 0.759205 -2.127995  
H -4.780880 -0.393012 -1.862995  
H -5.263600 -1.677345 0.213999  
C -0.511939 0.807275 -0.478635  
H -0.021184 0.384312 -1.359654  
N 0.451523 0.688161 0.638945  
O 0.172810 1.344080 1.710621  
C 1.740542 -0.034235 0.550027  
S 1.501876 -1.890354 0.483801  
C 0.785079 -2.240778 -1.160028  
H -0.281628 -2.008949 -1.199635  
H 1.325257 -1.700911 -1.942507  
H 0.918569 -3.315216 -1.313584  
S 2.616026 0.688623 -0.936324  
C 4.166227 -0.277540 -0.986388  
H 4.640553 -0.024107 -1.938466  
H 4.840562 -0.004461 -0.171229  
H 3.960488 -1.350096 -0.958209  
C 2.533545 0.204434 1.836724  
H 2.685053 1.274249 1.987254  
H 1.994508 -0.192619 2.700808  
H 3.501700 -0.295371 1.765519  
O -0.638383 2.172556 -0.835226  
O -1.488550 2.858372 0.124289  
H -0.954707 2.740566 0.941861

PBN-alpha-3CH2OH-OOH.com.log

34

C -3.830515 -1.463455 0.812327  
C -2.501205 -1.051005 0.869981  
C -2.071050 0.056688 0.130287  
C -2.985204 0.753305 -0.660531  
C -4.318034 0.339580 -0.717564  
C -4.743828 -0.767315 0.016037  
H -4.154490 -2.326064 1.388639  
H -1.791277 -1.598690 1.486047  
H -2.648609 1.617067 -1.222499  
H -5.023504 0.886626 -1.337332  
H -5.781704 -1.086650 -0.028563  
C -0.627601 0.511849 0.241285  
H -0.371478 0.699233 1.285677  
N 0.293667 -0.507177 -0.283560  
O -0.074319 -1.154402 -1.334788  
C 1.767428 -0.487672 -0.030298  
C 2.162672 0.211463 1.273860  
H 3.177660 -0.120936 1.505357  
H 1.498673 -0.099523 2.091741

C 2.152547 -1.980583 0.119424  
H 1.580000 -2.413721 0.957481  
H 1.839859 -2.490505 -0.797282  
C 2.466364 0.178797 -1.264661  
O 3.765268 0.666972 -0.992490  
H 3.636837 1.465118 -0.454748  
H 1.805811 0.972510 -1.631598  
H 2.565108 -0.568788 -2.054868  
O 3.549415 -2.081021 0.344903  
H 3.826276 -2.981419 0.122345  
O 2.157604 1.651928 1.140802  
H 2.599404 2.012489 1.925667  
O -0.368231 1.727783 -0.476504  
O -0.313757 2.819597 0.476504  
H 0.628483 2.726714 0.740568

PBN-alpha-3COOH-HO2.com.log

31

C -3.536855 -1.780279 -0.379391  
C -2.305110 -1.123559 -0.357150  
C -2.233170 0.215399 0.040179  
C -3.404688 0.889173 0.410500  
C -4.632534 0.230371 0.382579  
C -4.701968 -1.107578 -0.011471  
H -3.582051 -2.820223 -0.691316  
H -1.407752 -1.655910 -0.653905  
H -3.350001 1.931072 0.708814  
H -5.535472 0.763578 0.667753  
H -5.659404 -1.621388 -0.033182  
C -0.911403 0.959939 0.148169  
H -0.607249 1.088635 1.186708  
N 0.188174 0.225164 -0.542106  
O 0.159054 0.193989 -1.823926  
C 1.457375 -0.231873 0.050870  
C 1.927698 -1.383810 -0.892308  
O 1.311633 -2.408535 -1.022042  
O 3.088213 -1.096362 -1.499519  
H 3.301248 -1.853111 -2.079176  
O -1.097476 2.220646 -0.452313  
O -0.058195 3.107595 0.037198  
C 2.484732 0.934645 0.056728  
O 2.396337 1.926090 -0.626530  
O 3.490862 0.704314 0.914229  
H 4.102000 1.463597 0.845316  
C 1.301965 -0.810691 1.478460  
O 0.488683 -0.447967 2.292997  
O 2.220344 -1.760559 1.711608  
H 2.090134 -2.061736 2.631667  
H 0.659434 2.925224 -0.604550

PBN-CH2CONH2-3-OOH.com.log

43

C 4.151141 0.801803 0.372979  
C 2.827265 1.061055 0.007380  
C 2.123832 0.143394 -0.784317  
C 2.755762 -1.030672 -1.213990  
C 4.080453 -1.278317 -0.855407  
C 4.779540 -0.367323 -0.059074  
H 4.691195 1.518749 0.985789  
H 2.334743 1.973393 0.332610  
H 2.206510 -1.739246 -1.822133  
H 4.568180 -2.187841 -1.196114  
H 5.810895 -0.566780 0.220002  
C 0.679716 0.435210 -1.135226  
N -0.247843 -0.381670 -0.306940  
O -0.073967 -1.652957 -0.335816  
C -1.335621 0.123336 0.589134  
C -0.781394 0.259377 2.042753  
H -1.616200 0.525510 2.700979

H -0.060107 1.077425 2.063942  
C -1.932452 1.472293 0.090693  
H -1.999784 1.435422 -1.001838  
H -2.963415 1.525081 0.455277  
C -2.451085 -0.960681 0.577732  
H -2.158730 -1.780918 1.233757  
H -3.356972 -0.523091 1.016329  
C -2.817919 -1.488305 -0.804161  
O -2.832350 -0.793124 -1.823460  
N -3.231480 -2.781880 -0.825710  
H -3.404737 -3.194880 -1.732890  
H -3.008696 -3.405614 -0.063379  
C -0.167278 -1.023934 2.606745  
O -0.852782 -1.929065 3.071727  
N 1.197564 -1.059773 2.610478  
H 1.617318 -1.956197 2.820821  
H 1.732407 -0.442436 2.012168  
C -1.234429 2.779045 0.467159  
O -0.028287 2.899180 0.668593  
N -2.073381 3.852517 0.550741  
H -1.648406 4.766360 0.634594  
H -3.031864 3.806488 0.237177  
H 0.450623 1.482378 -0.955426  
O 0.500482 0.115525 -2.502176  
O -0.755297 0.700968 -2.936917  
H -1.404567 -0.000059 -2.691669

PBN-CH2COOMe-3-OOH.com.log

49

C 4.642188 -2.341757 -0.473208  
C 3.414321 -1.932632 0.049967  
C 3.150718 -0.576569 0.258359  
C 4.130248 0.373703 -0.048953  
C 5.357723 -0.034649 -0.565878  
C 5.615423 -1.391345 -0.782112  
H 4.839592 -3.398899 -0.629250  
H 2.660673 -2.675926 0.303432  
H 3.922912 1.423542 0.124960  
H 6.116182 0.706869 -0.802018  
H 6.574850 -1.705772 -1.184516  
C 1.810308 -0.155746 0.815403  
N 0.910899 0.398561 -0.205371  
O 1.419842 1.014824 -1.203591  
C -0.575280 0.129014 -0.213860  
C -0.711060 -1.276427 -0.862418  
H -0.198735 -1.245773 -1.833424  
H -0.174614 -2.017324 -0.260890  
C -1.096352 0.165705 1.252927  
H -0.678176 -0.669306 1.820092  
H -0.761521 1.108947 1.686623  
C -1.229297 1.204723 -1.099804  
H -2.309729 1.044374 -1.101222  
H -0.886762 1.096157 -2.130046  
C -1.119423 4.873647 -1.379387  
H -1.756137 5.163658 -0.539258  
H -0.078298 5.095346 -1.130473  
H -1.417531 5.400107 -2.286678  
O -1.279155 3.477216 -1.675527  
C -0.966398 2.635258 -0.668262  
O -0.567982 3.010923 0.413283  
C -2.106306 -1.820394 -1.121952  
O -3.127995 -1.180022 -1.255364  
O -2.052006 -3.162295 -1.246537  
C -3.294359 -3.806947 -1.578734  
H -3.053115 -4.864545 -1.686292  
H -4.026130 -3.659838 -0.780178  
H -3.698207 -3.405567 -2.511593  
C -2.608096 0.120577 1.389489  
O -3.357713 1.046226 1.173438  
O -3.023075 -1.093400 1.823042



C -4.449782 -1.240221 1.935220  
H -4.910855 -1.139910 0.949519  
H -4.609652 -2.240544 2.339657  
H -4.862227 -0.483082 2.606494  
H 1.321562 -1.014430 1.287200  
O 1.906603 0.896648 1.784716  
O 2.562591 0.300269 2.950708  
H 1.973282 0.653231 3.641338

PBN-CH2NHCOMe-3-OOH.com.log

52

C 3.881429 -1.835770 2.145565  
C 2.807662 -1.419317 1.360810  
C 3.030002 -0.705144 0.177209  
C 4.342960 -0.418385 -0.211328  
C 5.416361 -0.829258 0.581702  
C 5.190513 -1.539255 1.760260  
H 3.693667 -2.389527 3.061549  
H 1.794046 -1.645523 1.676220  
H 4.519931 0.127054 -1.130779  
H 6.431037 -0.593880 0.271788  
H 6.026969 -1.861279 2.374788  
C 1.867257 -0.337845 -0.736880  
H 1.606236 -1.190622 -1.365469  
N 0.662330 0.031650 0.045880  
O 0.850322 0.869217 1.007953  
C -0.754595 -0.244433 -0.330785  
C -1.378753 0.962141 -1.103588  
H -2.464986 0.812594 -1.114318  
H -1.020130 0.963458 -2.133515  
C -0.817761 -1.497853 -1.255375  
H -0.278731 -1.284859 -2.182222  
H -0.346396 -2.346460 -0.751870  
C -1.545185 -0.550962 0.966069  
H -1.026889 -1.348655 1.510561  
H -2.530638 -0.925548 0.690133  
N -1.785108 0.584426 1.843106  
H -0.970439 0.966378 2.304351  
C -3.048334 0.922052 2.264703  
O -4.063029 0.422227 1.794765  
C -3.103348 1.980214 3.357170  
H -2.142405 2.470277 3.544522  
H -3.849211 2.732217 3.085772  
H -3.439966 1.508570 4.286792  
N -1.086445 2.273622 -0.563072  
H -1.360533 2.434693 0.395281  
N -2.168152 -1.914611 -1.591785  
H -2.616779 -1.496926 -2.393909  
C -2.754885 -3.011195 -1.002239  
O -2.213148 -3.626736 -0.093946  
C -0.276430 3.178018 -1.168249  
O 0.209329 3.012884 -2.294273  
C 0.010741 4.437949 -0.376805  
H -0.707813 4.616670 0.428777  
H 1.012317 4.351732 0.059364  
H 0.014402 5.290866 -1.059191  
C -4.135025 -3.372576 -1.523544  
H -4.204827 -4.459900 -1.605114  
H -4.884425 -3.045234 -0.794389  
H -4.371939 -2.919716 -2.491559  
O 2.289792 0.715192 -1.577540  
O 1.467336 0.673413 -2.777411  
H 1.038667 1.568158 -2.711016

PBN-CH2OCOMe-3-OOH.com.log

49

C 5.088552 -1.506166 -0.500467  
C 3.730634 -1.671325 -0.229170  
C 3.001927 -0.629338 0.356336

C 3.637271 0.579443 0.658891  
C 4.993467 0.745847 0.375099  
C 5.721407 -0.297880 -0.199053  
H 5.650606 -2.317621 -0.954558  
H 3.227521 -2.600505 -0.479451  
H 3.072065 1.397913 1.098479  
H 5.480098 1.688433 0.608874  
H 6.779172 -0.170279 -0.412433  
C 1.535593 -0.801422 0.679847  
H 1.257061 -0.147635 1.509947  
N 0.665425 -0.510655 -0.465142  
O 1.123884 -0.686715 -1.649050  
C -0.794280 -0.194073 -0.349854  
C -1.566609 -1.355032 -1.047199  
H -0.924964 -1.752286 -1.836544  
H -1.774222 -2.144986 -0.322626  
C -1.194975 -0.057905 1.134561  
H -0.910553 -0.960333 1.683301  
H -0.707101 0.809058 1.577936  
C -1.026887 1.138386 -1.096940  
H -2.088077 1.383762 -1.094953  
H -0.687461 1.045568 -2.128135  
C 0.812828 2.775517 -0.821622  
O 1.441482 3.421167 -0.017622  
O -0.346299 2.185271 -0.390026  
C 1.208700 2.611524 -2.271795  
H 1.494062 1.575090 -2.481251  
H 0.388497 2.882268 -2.945184  
H 2.062445 3.263416 -2.457801  
O -2.747634 -0.870868 -1.681987  
O -2.618849 0.052341 1.200054  
C -4.022403 -1.304520 -1.408973  
O -4.923619 -0.777236 -2.008480  
C -3.280784 1.046131 1.885335  
O -4.480571 0.971549 1.940796  
C -4.214027 -2.411370 -0.395732  
H -3.628671 -3.303974 -0.641415  
H -3.925456 -2.063843 0.600839  
H -5.273406 -2.668128 -0.389867  
C -2.466615 2.158022 2.512602  
H -1.824759 1.775477 3.314625  
H -1.826234 2.660039 1.779785  
H -3.168187 2.875818 2.937841  
O 1.195364 -2.153977 1.042528  
O 1.737071 -2.381835 2.369592  
H 2.640155 -2.685288 2.150944

PBN-CH2OCONHMe-3-OOHb.com.log  
55

C 3.166321 -2.025400 2.879721  
C 2.131688 -2.007770 1.944708  
C 2.335429 -1.425700 0.686105  
C 3.589929 -0.888214 0.371710  
C 4.622493 -0.908917 1.310626  
C 4.411561 -1.474441 2.568549  
H 3.000696 -2.478037 3.853945  
H 1.165813 -2.435120 2.182459  
H 3.760100 -0.463481 -0.613845  
H 5.593288 -0.492363 1.054204  
H 5.215160 -1.494082 3.300274  
C 1.259559 -1.419991 -0.384108  
H 1.613881 -0.883393 -1.262994  
N -0.003190 -0.766226 0.069278  
O -0.602700 -1.292262 1.078928  
C -0.766522 0.279244 -0.670463  
C 0.107734 1.083086 -1.643924  
H -0.530214 1.817889 -2.142098  
H 0.579563 0.454052 -2.400096  
C -1.906015 -0.358613 -1.507792  
H -1.500012 -1.105288 -2.190035

H -2.415502 0.426859 -2.070324  
C -1.350561 1.215971 0.410554  
H -0.528013 1.658835 0.980053  
H -1.990589 0.627845 1.071528  
C -2.642552 3.289301 0.407690  
O -3.167932 4.185701 -0.216482  
O -2.099800 2.227466 -0.267303  
N -2.517162 3.267098 1.771786  
H -2.283089 2.400541 2.232368  
C -3.175649 4.292675 2.568086  
H -4.252919 4.110998 2.677599  
H -2.714876 4.323681 3.559091  
H -3.040974 5.257402 2.077134  
O 1.107735 1.803382 -0.911361  
C 2.365812 1.846597 -1.452753  
O 2.730544 1.174537 -2.403281  
N 3.123022 2.735724 -0.764908  
H 2.696670 3.180122 0.035245  
C 4.541332 2.909233 -1.017802  
H 4.794647 3.973942 -1.038927  
H 5.154405 2.412313 -0.255014  
H 4.764914 2.470210 -1.990873  
O -2.907207 -0.945582 -0.670154  
C -2.977829 -2.302507 -0.595767  
O -2.309405 -3.083464 -1.263105  
N -3.939818 -2.664799 0.282348  
H -4.371290 -1.923334 0.814753  
C -4.188878 -4.049283 0.641582  
H -3.767631 -4.294043 1.624389  
H -5.265096 -4.248951 0.653699  
H -3.716271 -4.681987 -0.110087  
O 1.029889 -2.770760 -0.722078  
O 0.323352 -2.787017 -1.994674  
H -0.581550 -3.044815 -1.696236

PBN-CH2OMe-3-OOH.com.log

43

C -4.492577 0.727031 1.179931  
C -3.164916 0.890240 0.782801  
C -2.548520 -0.076637 -0.028786  
C -3.288508 -1.199901 -0.422385  
C -4.613927 -1.363222 -0.019196  
C -5.220608 -0.396127 0.782405  
H -4.957047 1.479600 1.811750  
H -2.594716 1.744555 1.121780  
H -2.821918 -1.955664 -1.049699  
H -5.169160 -2.243524 -0.331602  
H -6.253050 -0.518159 1.099254  
C -1.144339 0.059555 -0.576051  
H -0.877298 -0.846930 -1.123840  
N -0.109241 0.255348 0.441313  
O -0.395228 0.851250 1.543769  
C 1.348427 0.072425 0.153715  
C 1.902071 -0.726764 1.357058  
H 1.793778 -0.122458 2.268355  
H 1.292519 -1.635241 1.476166  
C 1.613361 -0.683996 -1.152038  
H 1.220187 -0.120749 -2.011101  
H 2.700528 -0.758793 -1.257109  
C 1.936770 1.500875 0.043360  
H 1.850604 1.989827 1.024950  
H 1.327028 2.076794 -0.670274  
C 3.852661 2.732316 -0.510069  
H 3.861304 3.267817 0.452857  
H 4.882592 2.594541 -0.849581  
H 3.311077 3.351411 -1.243833  
O 3.281241 1.447800 -0.386042  
O 3.253535 -1.063251 1.126976  
C 3.802208 -1.820474 2.182682  
H 4.840780 -2.036511 1.918080

H 3.783847 -1.266196 3.135062  
H 3.262767 -2.770985 2.327153  
O 1.026572 -1.978241 -1.091856  
C 1.451561 -2.813323 -2.151641  
H 0.954591 -3.778095 -2.020088  
H 1.176072 -2.398724 -3.134257  
H 2.541420 -2.962611 -2.129749  
O -1.043807 1.041276 -1.630532  
O -1.331271 2.362702 -1.107308  
H -2.291539 2.418371 -1.274248

PBN-CH2POOMe2-3-OOH.com.log

64

C 5.217248 -1.365876 -0.323167  
C 4.069295 -0.599573 -0.520129  
C 2.937664 -1.173237 -1.114507  
C 2.966486 -2.516018 -1.503134  
C 4.113470 -3.284720 -1.296380  
C 5.241226 -2.708819 -0.709929  
H 6.092265 -0.917538 0.139684  
H 4.033528 0.436739 -0.201007  
H 2.088301 -2.961981 -1.963822  
H 4.127513 -4.327378 -1.601564  
H 6.137678 -3.303341 -0.555139  
C 1.697337 -0.350213 -1.374460  
N 0.919485 -0.090909 -0.159326  
O 1.534146 -0.059791 0.964437  
C -0.487665 0.454613 -0.178555  
C -0.456016 2.012493 -0.199214  
H -1.486054 2.372842 -0.138379  
H -0.082421 2.335759 -1.177436  
C -1.176852 -0.042214 -1.480211  
H -0.706636 0.426732 -2.350533  
H -1.034209 -1.125583 -1.560253  
C -1.188598 -0.062156 1.102291  
H -2.234264 0.253416 1.084210  
H -0.717305 0.382507 1.978955  
P -1.199467 -1.877762 1.346777  
O -2.592560 -2.013537 2.159375  
O -0.141531 -2.244241 2.515171  
C 1.104407 -2.910879 2.230444  
H 1.875715 -2.166800 2.022840  
H 1.358855 -3.483054 3.125583  
H 0.993346 -3.582041 1.375379  
C -2.941781 -3.276985 2.747301  
H -2.945460 -4.068292 1.990638  
H -2.240525 -3.532514 3.547035  
H -3.945616 -3.157779 3.158780  
O -1.052810 -2.721671 0.121526  
P -2.970083 0.150085 -1.789703  
O -3.324287 -0.139025 -3.202704  
O -3.764400 -0.751972 -0.701192  
O -3.299210 1.634421 -1.240129  
C -4.625181 2.169326 -1.429892  
H -4.577760 3.216774 -1.128967  
H -4.918121 2.093487 -2.480459  
H -5.340321 1.631457 -0.800534  
C -4.173282 -2.095946 -1.041659  
H -3.319900 -2.772659 -0.950378  
H -4.943279 -2.368159 -0.317446  
H -4.580367 -2.122804 -2.055106  
P 0.471518 3.067808 0.969848  
O 0.097463 4.498825 0.810334  
O 0.182355 2.403888 2.412641  
O 2.061649 2.794402 0.785809  
C 0.781926 2.988703 3.583058  
H 0.541428 4.054153 3.644761  
H 0.359043 2.462136 4.440036  
H 1.866305 2.848111 3.558443  
C 2.843941 3.673613 -0.043741

H 2.828408 3.312778 -1.076317  
H 2.461389 4.695829 0.005227  
H 3.865816 3.637976 0.341865  
H 1.063549 -0.854606 -2.104141  
O 2.010589 0.959986 -1.900267  
O 2.470063 0.770276 -3.264194  
H 3.419698 0.593091 -3.115643

PBN-CH2SMe-3-OOH.com.log

43

C 5.098940 -1.073343 -0.784309  
C 3.805816 -1.132988 -0.265812  
C 3.106947 0.048975 0.012846  
C 3.718556 1.282958 -0.228760  
C 5.009328 1.341880 -0.756106  
C 5.701762 0.162308 -1.032989  
H 5.635023 -1.993350 -1.001090  
H 3.326201 -2.088999 -0.086775  
H 3.184512 2.203337 -0.002226  
H 5.474829 2.305965 -0.941364  
H 6.709094 0.204797 -1.438355  
C 1.710645 0.008919 0.595862  
H 1.464875 0.974009 1.037328  
N 0.691829 -0.340023 -0.404093  
O 0.974437 -1.329478 -1.171152  
C -0.798324 0.005886 -0.261508  
C -1.387694 -1.235380 0.462190  
H -1.246627 -2.096621 -0.197960  
H -0.777230 -1.401153 1.353341  
C -0.888919 1.319439 0.549452  
H -0.695801 1.116167 1.608364  
H -0.108923 1.992314 0.175473  
C -1.259347 0.191521 -1.732893  
H -0.795669 -0.595335 -2.329547  
H -0.875359 1.150430 -2.093216  
S -3.056373 0.189715 -2.097338  
C -3.316209 -1.550476 -2.599104  
H -3.273883 -2.225794 -1.740912  
H -4.321221 -1.596343 -3.028008  
H -2.593801 -1.852395 -3.363528  
S -3.136570 -1.163794 1.040655  
S -2.458249 2.279135 0.414058  
C -2.991291 -2.408747 2.375826  
H -3.983342 -2.500112 2.826706  
H -2.693283 -3.387131 1.985943  
H -2.281372 -2.090125 3.145825  
C -1.829484 3.823392 1.164468  
H -1.006540 4.252156 0.582146  
H -2.663256 4.530587 1.166148  
H -1.504597 3.665782 2.198128  
O 1.579567 -0.995047 1.625461  
O 2.356845 -0.533060 2.759485  
H 3.231479 -0.914291 2.548887

PBN-CONH2-3-OOHb.com.log

34

C -0.828911 -0.831821 0.332655  
H -0.564483 -0.757223 1.385154  
N 0.167104 -0.013687 -0.434118  
O -0.050633 0.192185 -1.678015  
C 1.551955 0.357252 0.001021  
C 2.506938 -0.493714 -0.903887  
N 3.264593 0.131868 -1.799645  
H 3.822511 -0.439105 -2.421198  
H 3.187670 1.146869 -1.892548  
O 2.529239 -1.728228 -0.755514  
C 1.644974 1.927717 -0.203727  
O 2.393639 2.462467 -1.019043  
N 0.784476 2.627648 0.557423

H 0.837151 3.635801 0.497128  
H 0.382342 2.187896 1.379340  
C 1.753520 0.048349 1.523175  
O 1.049267 0.613024 2.359672  
N 2.752666 -0.795297 1.855480  
H 2.799963 -1.048974 2.834742  
H 3.074463 -1.470199 1.169743  
O -0.782681 -2.182809 -0.072494  
O 0.370091 -2.793469 0.564480  
H 1.085803 -2.585202 -0.083387  
C -2.230754 -0.321107 0.095666  
C -2.873181 0.382729 1.119424  
C -2.899575 -0.552028 -1.112779  
C -4.171678 0.860991 0.938858  
H -2.357050 0.554277 2.061276  
C -4.199124 -0.079220 -1.287453  
H -2.400142 -1.095800 -1.905609  
C -4.836367 0.629478 -0.265825  
H -4.663333 1.406521 1.739778  
H -4.715791 -0.262910 -2.225565  
H -5.849135 0.997214 -0.408283

PBN-COOMe-3-OOH.com.log

40

C 4.209245 -1.844399 0.532437  
C 2.932275 -1.316023 0.711064  
C 2.626757 -0.038096 0.228503  
C 3.605790 0.709267 -0.427488  
C 4.884690 0.177803 -0.604158  
C 5.188765 -1.097530 -0.127110  
H 4.441345 -2.836069 0.911538  
H 2.166429 -1.891801 1.224984  
H 3.365138 1.703653 -0.786634  
H 5.644048 0.763787 -1.115092  
H 6.185824 -1.507743 -0.264408  
C 1.234580 0.508169 0.457944  
H 0.921868 0.365515 1.490237  
N 0.254202 -0.197921 -0.402190  
O 0.551147 -0.377212 -1.635511  
C -1.198603 -0.081729 -0.095417  
C -3.309230 -1.162324 2.749866  
H -2.965258 -2.186541 2.911209  
H -2.933890 -0.520376 3.549993  
H -4.396530 -1.120396 2.697987  
C -1.522432 -0.652904 1.304219  
O -0.713182 -1.040232 2.113718  
O -2.848696 -0.676756 1.472317  
C -1.970596 -0.934438 -1.138019  
O -2.818218 -0.525508 -1.888014  
C -1.571386 1.417443 -0.122192  
O -1.727461 2.062314 0.903775  
O -1.594079 -2.214605 -1.011383  
O -1.595258 1.910307 -1.346737  
C -1.731401 3.342450 -1.450749  
H -0.851486 3.824355 -1.017209  
H -1.795723 3.544987 -2.518793  
H -2.633405 3.676425 -0.933880  
C -2.204550 -3.130431 -1.940202  
H -1.932812 -2.859576 -2.963163  
H -1.805044 -4.110936 -1.682750  
H -3.292023 -3.111657 -1.834654  
O 1.120804 1.907868 0.151829  
O 1.004235 2.648332 1.392254  
H 0.024348 2.712220 1.455806

PBN-NHCOMe-3-OOH.com.log

43

C 4.217715 -0.463833 -1.701983  
C 2.961015 0.107669 -1.506266

C 2.371686 0.083989 -0.235246  
C 3.054100 -0.509215 0.832124  
C 4.309302 -1.086273 0.632639  
C 4.892433 -1.063331 -0.635080  
H 4.669716 -0.446321 -2.690057  
H 2.425952 0.562359 -2.332920  
H 2.601774 -0.512367 1.821342  
H 4.833442 -1.543971 1.467249  
H 5.871584 -1.508048 -0.791884  
C 1.020397 0.713330 0.008857  
H 0.828221 0.795925 1.080087  
N -0.090574 -0.029848 -0.593110  
O 0.038818 -0.569888 -1.739684  
C -1.428829 -0.165858 0.163973  
N -1.723661 1.083189 0.822326  
H -1.343974 1.140232 1.765891  
C -2.084826 2.228741 0.147931  
O -2.461670 2.224061 -1.020879  
C -1.970005 3.499468 0.961222  
H -2.660125 4.243595 0.560140  
H -2.173295 3.337347 2.024494  
H -0.945973 3.878322 0.859150  
N -2.435837 -0.485195 -0.810500  
H -2.669099 0.343713 -1.358792  
N -1.324501 -1.240755 1.134968  
H -1.556497 -2.145592 0.713664  
C -2.635765 -1.727252 -1.364577  
O -2.262928 -2.778762 -0.844390  
C -0.808606 -1.159832 2.391420  
O -0.419524 -0.107072 2.911490  
C -3.392617 -1.705191 -2.675371  
H -2.682810 -1.494718 -3.484036  
H -3.841199 -2.684904 -2.845947  
H -4.166342 -0.931046 -2.691909  
C -0.736979 -2.477743 3.138699  
H -1.243869 -3.297580 2.623350  
H 0.315943 -2.744247 3.280334  
H -1.176557 -2.341086 4.130550  
O 0.912108 2.029472 -0.578737  
O 1.781890 2.899659 0.192356  
H 2.611432 2.828884 -0.317790

PBN-OCOMe-3-OOH.com.log

40

C 3.795594 -0.699795 -1.914702  
C 2.682861 -0.308451 -1.168261  
C 2.776366 -0.196007 0.224076  
C 3.993630 -0.475827 0.858258  
C 5.103493 -0.860425 0.106901  
C 5.007494 -0.975257 -1.281143  
H 3.712549 -0.780874 -2.994972  
H 1.751379 -0.080407 -1.675072  
H 4.067596 -0.379978 1.935965  
H 6.044571 -1.069081 0.608423  
H 5.873222 -1.274956 -1.865554  
C 1.567580 0.132555 1.088274  
N 0.512940 0.832356 0.305263  
O 0.830074 1.908543 -0.308303  
C -0.897940 0.428565 0.186731  
C -1.644276 2.473922 1.287815  
O -0.969920 2.330236 2.276715  
O -1.725344 1.572880 0.254178  
C -2.519863 3.660091 0.991431  
H -2.130476 4.183206 0.111506  
H -3.540290 3.337281 0.762745  
H -2.521115 4.330401 1.850967  
O -1.045272 -0.097257 -1.102286  
C -2.253454 -0.467992 -1.712237  
O -2.148402 -1.064951 -2.747481  
C -3.566424 -0.097674 -1.068621

H -3.585583 -0.311821 0.001920  
H -3.744905 0.973976 -1.194881  
H -4.349110 -0.657774 -1.581738  
O -1.299138 -0.436133 1.202502  
C -1.197096 -1.844147 1.240648  
O -1.743763 -2.370342 2.165802  
C -0.453160 -2.585765 0.154360  
H -0.158196 -3.548714 0.574816  
H -1.121170 -2.772002 -0.693190  
H 0.418579 -2.058661 -0.233566  
H 1.124130 -0.770853 1.507566  
O 1.991906 0.935003 2.163569  
O 1.094480 0.695889 3.277883  
H 0.379329 1.338035 3.076668

PBN-OCONHMe-3-OOH.com.log  
46

C -4.768227 0.195008 -1.211553  
C -3.443179 -0.078293 -0.879644  
C -3.015787 0.036317 0.449698  
C -3.922024 0.419348 1.439734  
C -5.248850 0.696341 1.100756  
C -5.674920 0.585600 -0.222148  
H -5.093886 0.102906 -2.244396  
H -2.735426 -0.379150 -1.647402  
H -3.588325 0.492784 2.468367  
H -5.948629 0.996429 1.876321  
H -6.708332 0.798929 -0.482993  
C -1.582277 -0.324494 0.797964  
N -0.649113 0.500598 -0.027266  
O -0.939576 1.730563 -0.234122  
C 0.777722 0.122130 -0.157408  
C 0.429360 -1.908153 -1.425131  
O -0.388562 -1.435747 -2.181407  
O 0.918346 -1.263245 -0.281617  
N 1.003586 -3.129317 -1.487251  
H 1.661085 -3.371884 -0.760060  
C 0.637685 -4.110165 -2.494535  
H 1.519104 -4.431376 -3.059635  
H 0.165378 -4.987544 -2.038294  
H -0.070172 -3.639452 -3.177587  
O 1.320006 0.744446 -1.275176  
C 2.112574 1.902303 -1.132672  
O 3.321951 1.816989 -0.989166  
N 1.384962 3.011773 -1.284620  
H 0.379374 2.871425 -1.213161  
C 1.960529 4.342213 -1.181940  
H 3.036273 4.268819 -1.345487  
H 1.521604 4.993379 -1.943290  
H 1.779310 4.778348 -0.192234  
O 1.418729 0.507484 1.027354  
C 2.406294 -0.317476 1.611933  
O 2.117439 -0.978229 2.595420  
N 3.600431 -0.204683 1.023054  
H 3.687084 0.459934 0.249648  
C 4.779742 -0.887368 1.530988  
H 5.309802 -1.377804 0.708436  
H 5.462595 -0.182808 2.019940  
H 4.464369 -1.635848 2.258865  
H -1.375919 -1.368998 0.567634  
O -1.321650 -0.132199 2.176737  
O -0.672356 -1.321041 2.695256  
H 0.269182 -1.028706 2.765436

PBN-OMe-3-OOH.com.log  
34

C -3.458613 -1.309450 -1.056357  
C -2.215540 -0.685729 -1.174617  
C -1.753227 0.167365 -0.167597



|   |           |           |           |
|---|-----------|-----------|-----------|
| C | -2.550064 | 0.396201  | 0.962100  |
| C | -3.795026 | -0.222433 | 1.076258  |
| C | -4.251026 | -1.076532 | 0.068939  |
| H | -3.810364 | -1.968880 | -1.845274 |
| H | -1.599595 | -0.860584 | -2.053721 |
| H | -2.181962 | 1.048447  | 1.747007  |
| H | -4.408255 | -0.041879 | 1.955172  |
| H | -5.221709 | -1.556740 | 0.160172  |
| C | -0.403505 | 0.836662  | -0.311763 |
| N | 0.627170  | 0.239430  | 0.547380  |
| O | 0.338591  | -0.070107 | 1.755479  |
| C | 1.877303  | -0.328814 | -0.056349 |
| C | 3.243567  | 0.620520  | 1.665531  |
| H | 3.458550  | 1.462423  | 1.000451  |
| H | 2.471803  | 0.899820  | 2.386572  |
| H | 4.153426  | 0.320169  | 2.188708  |
| O | 2.834152  | -0.531923 | 0.915987  |
| O | 2.246468  | 0.582573  | -1.031762 |
| C | 3.314271  | 0.161572  | -1.890443 |
| H | 2.976451  | -0.612683 | -2.584517 |
| H | 3.612868  | 1.054870  | -2.441833 |
| H | 4.159875  | -0.214355 | -1.305816 |
| O | 1.605445  | -1.544703 | -0.670789 |
| C | 1.297505  | -2.646604 | 0.193608  |
| H | 0.440497  | -2.416292 | 0.834677  |
| H | 1.049658  | -3.475211 | -0.472677 |
| H | 2.158171  | -2.907222 | 0.814469  |
| H | -0.044690 | 0.782860  | -1.339800 |
| O | -0.429452 | 2.213000  | 0.103047  |
| O | -1.257782 | 2.915170  | -0.857690 |
| H | -2.138176 | 2.820623  | -0.445290 |

PBN-POOMe-3-OOHb.com.log

55

|   |           |           |           |
|---|-----------|-----------|-----------|
| C | -4.750213 | 1.631234  | 0.451619  |
| C | -3.499485 | 1.026046  | 0.555821  |
| C | -3.272137 | -0.227531 | -0.027366 |
| C | -4.307706 | -0.871051 | -0.705715 |
| C | -5.560180 | -0.260913 | -0.810049 |
| C | -5.784992 | 0.988871  | -0.234053 |
| H | -4.918953 | 2.602974  | 0.908490  |
| H | -2.694646 | 1.527514  | 1.088419  |
| H | -4.128394 | -1.845848 | -1.144464 |
| H | -6.360579 | -0.767581 | -1.342813 |
| H | -6.760907 | 1.460540  | -0.314295 |
| C | -1.918461 | -0.894579 | 0.150152  |
| N | -0.860305 | -0.002344 | -0.405199 |
| O | -1.100310 | 0.505344  | -1.562071 |
| C | 0.575976  | -0.016056 | -0.025678 |
| P | 1.328534  | 1.438833  | -1.008413 |
| O | 2.562054  | 1.740005  | -0.013723 |
| O | 0.419989  | 2.741718  | -0.755064 |
| C | -0.462926 | 3.272945  | -1.769310 |
| H | -0.386143 | 4.360348  | -1.697911 |
| H | -0.156694 | 2.935272  | -2.760872 |
| H | -1.482013 | 2.943914  | -1.563236 |
| C | 3.681901  | 2.503942  | -0.493891 |
| H | 3.399512  | 3.554163  | -0.621494 |
| H | 4.455819  | 2.419525  | 0.270477  |
| H | 4.040539  | 2.097806  | -1.442797 |
| O | 1.718225  | 1.166957  | -2.414540 |
| P | 0.891033  | 0.198168  | 1.834189  |
| O | 2.292213  | -0.071917 | 2.241375  |
| O | -0.210792 | -0.688591 | 2.598773  |
| O | 0.292983  | 1.664154  | 2.081089  |
| C | 1.063858  | 2.719196  | 2.691203  |
| H | 2.095529  | 2.401213  | 2.852211  |
| H | 1.032646  | 3.573677  | 2.013318  |
| H | 0.593874  | 2.972508  | 3.644911  |
| C | 0.115120  | -1.934297 | 3.266060  |

H 1.178175 -2.155454 3.173309  
H -0.159529 -1.812684 4.316158  
H -0.480354 -2.719570 2.800607  
P 1.381493 -1.636028 -0.593298  
O 1.040585 -2.732313 0.366454  
O 0.844173 -1.861584 -2.066519  
O 2.948138 -1.359937 -0.772261  
C 1.623345 -1.807645 -3.285980  
H 2.469768 -2.495423 -3.222205  
H 0.939500 -2.128128 -4.072575  
H 1.957140 -0.784760 -3.455374  
C 3.929506 -1.811015 0.196596  
H 4.890119 -1.758235 -0.318128  
H 3.906305 -1.151198 1.063596  
H 3.716146 -2.839487 0.495395  
H -1.699202 -1.051322 1.201682  
O -1.851754 -2.151902 -0.510317  
O -1.630271 -3.199058 0.471783  
H -0.644948 -3.275836 0.400519

PBN-SMe-3-OOH.com.log

34

C 3.829736 -1.758178 0.250026  
C 2.546637 -1.226321 0.356760  
C 2.336526 0.150543 0.209561  
C 3.426070 0.988660 -0.038413  
C 4.710730 0.451849 -0.150723  
C 4.917103 -0.919489 -0.007137  
H 3.980539 -2.828054 0.366772  
H 1.704039 -1.883715 0.553015  
H 3.264730 2.055074 -0.142543  
H 5.550825 1.111937 -0.349428  
H 5.917902 -1.334287 -0.092592  
C 0.942786 0.725047 0.406397  
N -0.043018 -0.054213 -0.406654  
O 0.255176 -0.190899 -1.645578  
C -1.470165 -0.198923 -0.021536  
S -2.336729 -1.401437 -1.108140  
C -1.223603 -2.847790 -1.045464  
H -0.289363 -2.630003 -1.565488  
H -1.035377 -3.143521 -0.010047  
H -1.754564 -3.654724 -1.558256  
S -1.484531 -0.694159 1.774402  
C -3.272272 -0.828581 2.125925  
H -3.336121 -1.302446 3.109314  
H -3.751645 0.151148 2.164641  
H -3.757063 -1.461952 1.380180  
S -2.401771 1.420105 -0.200440  
C -2.045786 1.891755 -1.936486  
H -2.541244 2.856435 -2.079577  
H -0.970471 2.001066 -2.087176  
H -2.455653 1.158133 -2.631047  
H 0.638275 0.675663 1.452627  
O 0.913901 2.090619 0.015236  
O 0.233567 2.863159 1.034894  
H -0.702910 2.742130 0.753157
